# Supplementary material for: Stereo- and regiocontrol in intermolecular [2+2] cycloadditions between diarylketenes and allenamides to access substituted α-methylenecyclobutanones
Source: Royal Society of Chemistry journal article supplement (doi:10.1039/d3cc03979j), 2023-01-01

# Stereo- and Regiocontrol in Intermolecular [2+2] Cycloadditions between Diarylketenes and Allenamides to Access Substituted $\alpha$ -Methylenecyclobutanones.

Akshay Suresh Kshirsagar<sup>at</sup>, Sayaji Arun More<sup>at</sup> and Rai-Shung Liu\*<sup>a</sup>

<sup>a</sup>Department of Chemistry, National Tsing-Hua University, Hsinchu, Taiwan, ROC-----e-mail: rslu@mx.nthu.edu.tw

## Content

|                                                                                                      |     |
|------------------------------------------------------------------------------------------------------|-----|
| 1. General synthetic procedures for preparation of substrates-----                                   | S2  |
| 2. Standard reaction procedures-----                                                                 | S4  |
| 3. Chemical functionalization procedures -----                                                       | S4  |
| 4. References -----                                                                                  | S5  |
| 5. NOE of compound <b>5a</b> and <b>5b</b> -----                                                     | S6  |
| 6. Spectral data of key compounds -----                                                              | S7  |
| 7. X-ray crystallographic data of compound ( <b>3i</b> , <b>3l</b> , <b>3m</b> and <b>4f</b> ) ----- | S22 |
| 8. <sup>1</sup> H, <sup>13</sup> C and NOE spectra and of key compounds. -----                       | S64 |

## 1. (a) General Procedure.

Unless otherwise noted, all the preparations of substrates were performed in oven-dried glassware under a nitrogen atmosphere with freshly distilled solvents. The catalytic reactions were performed under a nitrogen atmosphere. DCE, DCM and Ether were distilled from CaH<sub>2</sub> under nitrogen. THF was re-distilled from Na metal under nitrogen. All other commercial reagents were used without further purification unless otherwise indicated. <sup>1</sup>H NMR and <sup>13</sup>C NMR spectra were recorded on a Bruker 500, 600 MHz and Varian 500,700 MHz spectrometers using chloroform-d (CDCl<sub>3</sub>) as the internal standards. High-resolution mass spectral analysis (HRMS) data were measured on JMS-T100LP4G (JEOL) mass spectrometer or a TOF mass analyzer equipped with the ESI source and Magnetic Sector Mass Analyzer (MStation) equipped with the EI source. Brand: JEOL Model: JMS-T200GC AccuTOF GCx, Source mode: FD (field desorption). Single crystal X-ray diffraction intensity data were collected on a Bruker X8 APEX diffractometer equipped with a CCD area detector and Mo K $\alpha$  radiation ( $\lambda = 0.71073 \text{ \AA}$ ) at 100 K; all data calculations were performed by using the PC version of the APEX2 program package. Final R indices were obtained using those reflections  $I > 2\sigma(I)$ .

## (b) General synthetic procedures for preparation of diazo ketones<sup>[s1]</sup> and allene substrates<sup>[s2]</sup>

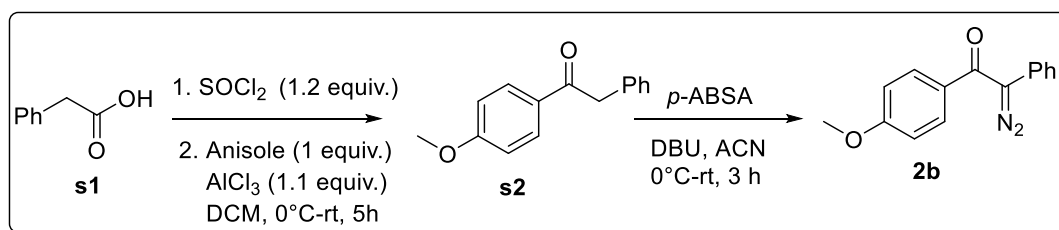

To a DCM (60 ml) solution of substituted phenylacetic acid (**s1**) (5.0 g, 36.72 mmol) was added SOCl<sub>2</sub> (3.20 ml, 44.07 mmol) dropwise at 0 °C. The mixture was warm to room temperature and stirred for 2 h. The resulting solution was cooled to 0 °C, followed by the addition of AlCl<sub>3</sub> (5.39 g, 40.40 mmol) and Anisole (3.99 ml, 36.72 mmol). The mixture was stirred at room temperature for 3h. After completion of the reaction. The reaction was quenched with H<sub>2</sub>O, extracted with ethyl acetate (2 x 50 mL), and washed with brine (25 mL). The combined organic layers were dried over MgSO<sub>4</sub>, concentrated under reduced pressure, and purified by a silica column (EA/Hexane = 10/90) to afford 1-(4-methoxyphenyl)-2-phenylethanone (**s2**) white solid (7.0 g, 30.94 mmol,

84%). To an acetonitrile (23 ml) solution of 1-(4-methoxyphenyl)-2-phenylethanone (**s2**) (3.0 g, 13.26 mmol) was added p-ABSA (3.5 g, 14.59 mmol). The solution was cooled to 0 °C and DBU (2.34 ml, 17.24 mmol) was added dropwise to the above mixture and stirred at room temperature for 3 h. The reaction was quenched with water, followed by extraction with ether (2 x 100 mL), and washed with brine (25 mL). The combined organic layers were dried over MgSO<sub>4</sub>, concentrated under reduced pressure, and purified by a silica column (EA/Hexane = 15/85) to afford 2-diazo-1-(4-methoxyphenyl)-2-phenylethan-1-one (**2b**) (2.4 g, 9.51 mmol, 72%) as a yellow solid.

All diazo ketones (**2a – 2m**) were synthesized according to the our recently reported literature above procedure <sup>[S1]</sup>

All the allenamide (**1a-1i**) substrates were known compounds and synthesized according to related reported procedures of literature. <sup>[S2]</sup>

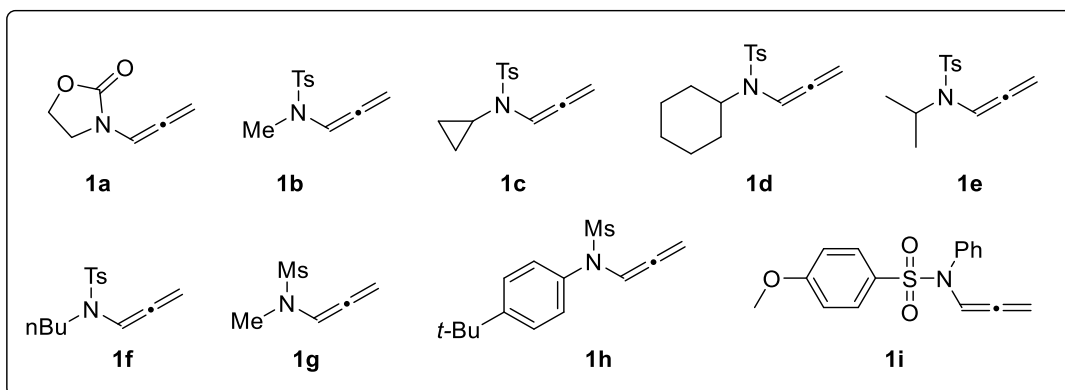

## 2. Standard catalytic reaction procedure:

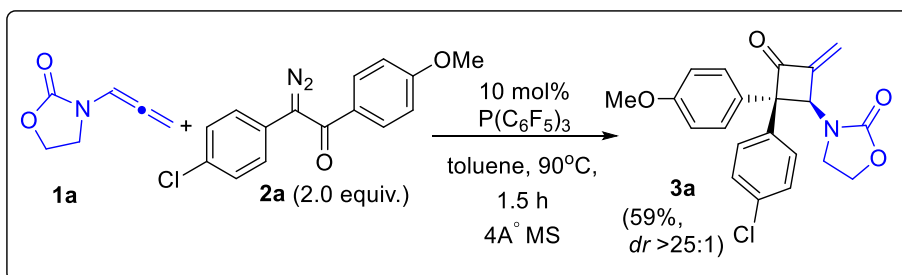

A suspension of  $P(C_6F_5)_3$  (21.4 mg, 0.040 mmol) in dry toluene (1 mL) was fitted with  $N_2$  balloon. To this solution was added a toluene (1 mL) solution of 3-(propa-1,2-dien-1-yl)oxazolidin-2-one **1a** (50 mg, 0.402 mmol) and 2-(4-chlorophenyl)-2-diazo-1-(4-methoxyphenyl)ethan-1-one **2a** (231 mg, 0.805 mmol) at room temperature. After addition reaction mixture was stirred in pre-heated oil bath  $90^\circ C$  for 1.5 h, reaction progress was monitored by TLC, after completion then reaction mixture was filtered over a short celite bed, concentrated, and purified through a silica column using ethyl acetate/hexane (30: 70) as the eluent to afford compound 3-((1R,2R)-2-(4-chlorophenyl)-2-(4-methoxyphenyl)-4-methylene-3-oxocyclobutyl)oxazolidin-2-one **3a** (92 mg, 0.239 mmol, 59%) as a pale yellow oil.

## 3. Synthetic procedures for chemical functionalizations:

### (a) Synthesis of N-isopropyl-N-((1R,2S,4S)-2-(4-methoxyphenyl)-4-methyl-3-oxo-2-phenylcyclobutyl)-4-methylbenzenesulfonamide (**5a**):

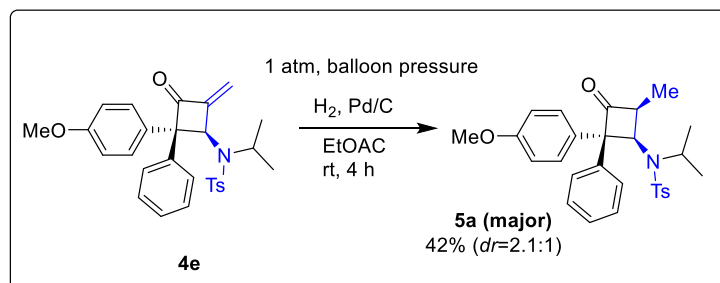

A suspension of **4e** (50 mg, 0.105 mmol) in an ethyl acetate (2 mL) was degassed with  $N_2$  for 10 min. To this solution Palladium on carbon (Pd/C, 30.0 mg, 10% Wt), was added then reaction vessel was evacuated and then fitted with  $H_2(g)$  balloon (1 atm) and reaction was stirred at room temperature for 4 h. Reaction progress was monitored by TLC, after completion then reaction mixture was filtered over a short celite bed, concentrated, and purified through a silica column using ethyl acetate/hexane (10: 90) as the eluent to afford N-

isopropyl-N-((1R,2S,4S)-2-(4-methoxyphenyl)-4-methyl-3-oxo-2-phenylcyclobutyl)-4-methylbenzenesulfonamide **5a** (57 mg, 0.043 mmol, 42%, *dr*=2.1:1) as a colourless oil.

**(b) Synthesis of N-((1R,2S,3S,4R)-3-hydroxy-2-(4-methoxyphenyl)-4-methyl-2-phenylcyclobutyl)-N,4-dimethylbenzenesulfonamide (5b):**

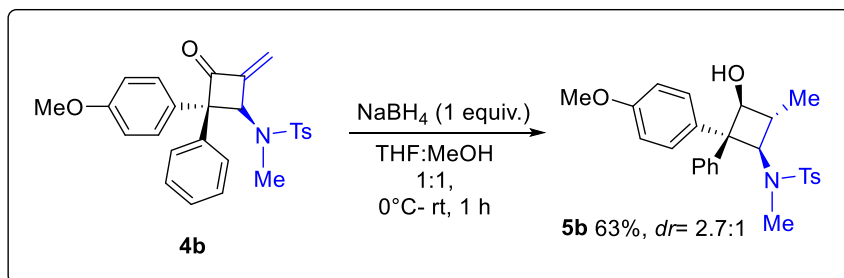

A suspension of **4b** (50 mg, 0.111 mmol) in an Methanol (1 mL): THF (1mL) was cooled to  $0^\circ\text{C}$  then  $\text{NaBH}_4$  (4.23 mg, 0.111mmol) was added, then reaction mixture was stirred at  $0^\circ\text{C}$  for 1 h. Reaction progress was monitored by TLC, after completion then reaction mixture was quenched with saturated solution of  $\text{NH}_4\text{Cl}$  (2mL) and extracted with ethyl acetate (2X10mL) dried over sodium sulfate, concentrated, and purified through a silica column using ethyl acetate/hexane (30: 70) as the eluent to afford N-((1R,2S,3S,4R)-3-hydroxy-2-(4-methoxyphenyl)-4-methyl-2-phenylcyclobutyl)-N,4-dimethylbenzenesulfonamide **5b** (31 mg, 0.070 mmol, 63% *dr*=2.7:1) as a colourless oil.

## 2. References:

[S1] (a) A. V. Sasane and R.-S Liu, *Chem. Commun.*, 2023, **59**, 1086-1089; (b) S. A. More, V. A. Sadaphal, T-C Kuo, M-J Cheng and R.-S Liu, *Chem. Commun.*, 2022, **58**, 10064–10067; (c) C. N. Chen, W. M. Cheng, J. K. Wang, T. H. Chao, M. J. Cheng and R.-S. Liu, *Angew. Chem. Int. Ed.* 2021, **60**, 4479-4484; (d) Q. Lu, S. Mondal, S. Cembellín and F. Glorius, *Angew. Chem. Int. Ed.* 2018, **57**, 10732- 10736.

[S2] (a) J. He, L. Yang, X. Zhang, W. Xu, H. Wang, M. Lang, J. Wang and S. Peng, *ACS Catal.*, 2022, **12**, 23, 14647–14653; (b) Y. B. Pandit and R.-S. Liu., *Org. Lett.*, 2022, **24** (2), 548-553; (c) R. R. Singh, S. K. Pawar, M.-J. Huang and R.-S. Liu, *Chem. Commun.*, 2016, **52**, 11434-11437; (d) S.-P. Samuel, C. Hernandez-Diaz, M. Piedrafita, E. Rubio and J. M. Gonzalez., *Adv. Synth. Catal.* 2012, **354**, 1651–1657; (e) Suárez-Pantiga, Samuel, C. Hernández-Díaz, E. Rubio,

and J. M. González., *Angew. Chem., Int. Ed.* 2012, **51**, 11552–11555; (f) Yang, Xiaoyu, and F. D. Toste., *Chem. Sci.* 2016, **7**, 2653–2656; (g) I. Chakrabarty, S. M. Inamdar, M. O. Akram, A. B. Gade, S. Banerjee, S. Berac and N. T. Patil., *Chem. Commun.*, 2017, **53**, 196–199; (h) H.-H. Li, X.-X. Li, Z.-G. Zhao, X. Yuan and C.-Y. Sun., *Org. Biomol. Chem.*, 2017, **15**, 4005–4013; (i) H. Fuwa and M. A Sasaki., *Org. Biomol. Chem.* 2007, **5**, 2214–2218; (j) W.-F. Zheng, G.-J. Sun, L. Chen and Q. Kang., *Adv. Synth. Catal.*, 2018, **360**, 1790–1794; (k) R. Blicck, L. A. Perego, I. Ciofini, L. Grimaud, M. Taillefer and F. Monnier., *Synthesis* 2019, **51**, 1225–1234; (l) L.-L. Wei, J. A. Mulder, H. Xiong, C. A. Zificksak, C. J. Douglas and R. P. Hsung., *Tetrahedron* 2001, **57**, 459–466; (m) S. Peng, S. Cao and J. Sun., *Org. Lett.*, 2017, **19**, 524–527; (n) S. Guo, J. Chen, M. Yi, L. Dong, A. Lin and H. Yao., *Org. Chem. Front.*, 2021, **8**, 1783–1788; (o) L. Rout and A. M. Harned., *Chem. Eur. J.*, 2009, **15**, 12926–12928; (p) R. Kuppusamy, R. Santhoshkumar, R. Boobalan, H.-R. Wu and C.-H. Cheng., *ACS Catal.*, 2018, **8**, 1880–1883; (q) X. Huang, W. Thor, X. Feng, L. Kang, M. Yang, C.-S. Lee, Y.-K. Cheng and S. He., *Org. Chem. Front.*, 2020, **7**, 255–260; (r) Y. Liu, Z. Yi, X. Yang, H. Wang, C. Yin, M. Wang, X.-Q. Dong and X. Zhang., *ACS Catal.*, 2020, **10**, 11153–11161.

## 5. NOE of compound 5a and 5b

### (a) NOE for compound 5a:

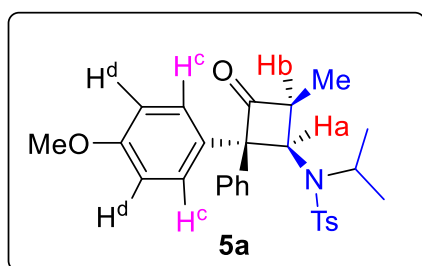

| Sr. No. | Irradiation                     | Intensity increase % (Key peaks)                                                      |
|---------|---------------------------------|---------------------------------------------------------------------------------------|
| 1.      | Me ( $\delta$ 1.1)              | H <sup>b</sup> ( $\delta$ 3.5, 1.48%), H <sup>a</sup> (not affected)                  |
| 2.      | H <sup>a</sup> ( $\delta$ 4.8)  | H <sup>b</sup> ( $\delta$ 7.35, 0.63%), H <sup>c</sup> ( $\delta$ 7.25, 4.18%)        |
| 3.      | H <sup>b</sup> ( $\delta$ 3.5)  | H <sup>a</sup> ( $\delta$ 4.8, 0.77%), Me (1.1, 2.66%) and (isopropyl group affected) |
| 4.      | H <sup>c</sup> ( $\delta$ 7.25) | H <sup>d</sup> ( $\delta$ 6.79, 3.86%), H <sup>a</sup> ( $\delta$ 4.8, 2.94%)         |

**(b) NOE for compound 5b:**

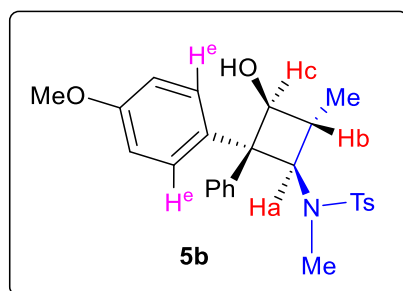

| Sr. No. | Irradiation                    | Intensity increase % (Key peaks)                                                                                                                                                                       |
|---------|--------------------------------|--------------------------------------------------------------------------------------------------------------------------------------------------------------------------------------------------------|
| 1.      | Me ( $\delta$ 0.6)             | H <sup>a</sup> ( $\delta$ 4.2, 1.03%), H <sup>c</sup> ( $\delta$ 3.7, 1.09%), H <sup>b</sup> ( $\delta$ 2.6, 1.77%) (H <sup>a</sup> , H <sup>c</sup> and H <sup>b</sup> all affected, cis to Me group) |
| 2.      | H <sup>a</sup> ( $\delta$ 4.2) | H <sup>c</sup> ( $\delta$ 3.7, 2.63%), Me ( $\delta$ 0.6, 1.88%), H <sup>b</sup> ( $\delta$ 2.6, very less affected, 0.60%), H <sup>e</sup> ( $\delta$ 7.4, 3.93%)                                     |
| 3.      | H <sup>b</sup> ( $\delta$ 2.6) | H <sup>a</sup> ( $\delta$ 4.2, 0.72%) and H <sup>c</sup> (3.7, 0.75%) (very less affected)<br>Me ( $\delta$ 0.6, 3.27 %)                                                                               |

**6. Spectral Data:**

**Spectral data for N-methyl-N-(propa-1,2-dien-1-yl)methanesulfonamide (1g)**

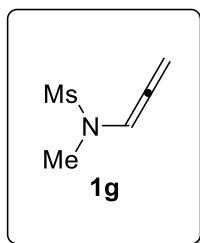

(Compound **1i**) was purified on silica gel column using ethyl acetate/hexane: (10: 90) as the eluent; brown oil (300 mg, 2.04 mmol, 75%); <sup>1</sup>H NMR (400 MHz, CDCl<sub>3</sub>): 6.70 ~ 6.67 (m, 1H), 5.37 (d, *J* = 10.5 Hz, 2H), 2.84 (s, 3H), 2.80 (s, 3H); <sup>13</sup>C NMR (100 MHz, CDCl<sub>3</sub>): 200.7, 101.0, 87.8, 35.5, 33.0; HRMS-ESI+ *m/z*: [M+Na]<sup>+</sup> calcd C<sub>5</sub>H<sub>9</sub>NO<sub>2</sub>S: 170.02517; found: 170.02518.

**Spectral data for N-(4-(tert-butyl)phenyl)-N-(propa-1,2-dien-1-yl)methanesulfonamide (1h)**

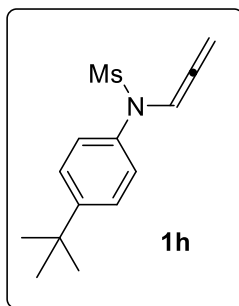

(Compound **1h**) was purified on silica gel column using ethyl acetate/hexane: (10: 90) as the eluent; brown oil (350 mg, 1.32 mmol, 70%);  $^1\text{H}$  NMR (400 MHz,  $\text{CDCl}_3$ ): 7.40 ~ 7.37 (m, 2H), 7.25 ~ 7.23 (m, 2H), 6.90 (t,  $J = 11.2$  Hz, 1H), 5.15 (d,  $J = 11.2$  Hz, 2H), 2.98 (s, 3H), 1.30 (s, 9H);  $^{13}\text{C}$  NMR (175 MHz,  $\text{CDCl}_3$ ): 201.0, 151.8, 134.5, 128.4, 126.1, 101.7, 87.5, 38.0, 34.6, 31.2, four carbons are merged; HRMS-ESI-  $m/z$ :  $[\text{M}-\text{H}]$  calcd  $\text{C}_{14}\text{H}_{19}\text{NO}_2\text{S}$ : 264.10582; found: 264.10616.

**Spectral data for 4-methoxy-N-phenyl-N-(propa-1,2-dien-1-yl)benzenesulfonamide(1i)**

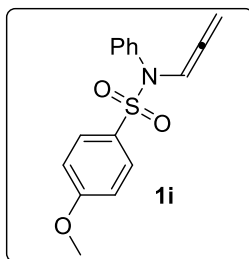

(Compound **1i**) was purified on silica gel column using ethyl acetate/hexane: (10: 90) as the eluent; brown oil (280 mg, 0.929 mmol, 56%);  $^1\text{H}$  NMR (700 MHz,  $\text{CDCl}_3$ ): 7.56 (d,  $J = 9.1$  Hz, 2H), 7.27 ~ 7.23 (m, 3H), 7.06 (t,  $J = 6.3$  Hz, 1H), 6.98 ~ 6.97 (m, 2H), 6.91 (d,  $J = 9.1$  Hz, 2H), 4.99 (d,  $J = 6.3$  Hz, 2H), 3.83 (s, 3H);  $^{13}\text{C}$  NMR (175 MHz,  $\text{CDCl}_3$ ): 201.0, 163.1, 137.2, 129.5, 128.6, 128.5, 113.9, 102.3, 87.3, 55.5, six carbons are merged; HRMS-ESI+  $m/z$ :  $[\text{M}+\text{Na}]^+$  calcd  $\text{C}_{16}\text{H}_{15}\text{NO}_3\text{S}$ : 324.06703; found: 324.06727.

**Spectral Data for 3-((1*R*,2*R*)-2-(4-chlorophenyl)-2-(4-methoxyphenyl)-4-methylene-3-oxocyclobutyl)oxazolidin-2-one (3a):**



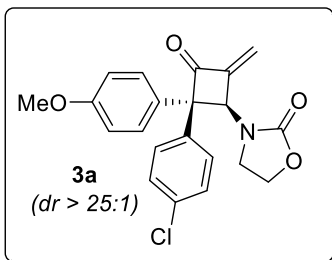

(Compound **3a**, *diastereomeric ratio* > 25:1) was purified on silica gel column using ethyl acetate/hexane: (25: 75) as the eluent; pale yellow oil (92 mg, 0.239 mmol, 59%);  $^1\text{H}$  NMR (700 MHz,  $\text{CDCl}_3$ ):  $\delta$  7.62 (d,  $J$  = 8.5 Hz, 2H), 7.27 (d,  $J$  = 8.4 Hz, 2H), 7.21 (d,  $J$  = 8.4 Hz, 2H), 6.87 (d,  $J$  = 8.4 Hz, 2H), 6.28 (s, 1H), 5.85 (s, 1H), 5.44 (s, 1H), 4.17 ~ 4.13 (m, 1H), 3.81 ~ 3.76 (m, 1H), 3.74 (s, 3H), 3.30 ~ 3.26 (m, 1H), 2.27 ~ 2.25 (m, 1H);  $^{13}\text{C}$  NMR (175 MHz,  $\text{CDCl}_3$ ):  $\delta$ ; 197.3, 158.9, 158.4, 149.6, 136.9, 133.6, 131.9, 129.2, 128.25, 128.21, 120.3, 114.4, 77.6, 62.5, 57.9, 55.2, 41.2, four carbons are merged with aromatic region; HRMS (FD)  $m/z$ :  $[\text{M}]^+$  calcd for  $\text{C}_{21}\text{H}_{18}\text{ClNO}_4$ : 383.09298; found: 383.09315.

**Spectral Data for 3-((*1R,2S*)-2-(4-methoxyphenyl)-4-methylene-3-oxo-2-phenylcyclobutyl)oxazolidin-2-one (**3b**):**

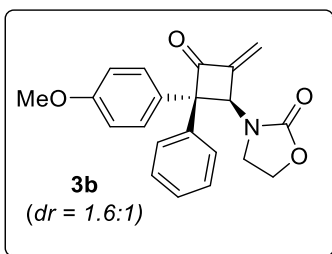

Compound **3b** (*diastereomeric ratio* 1.6:1) was purified on silica gel column using ethyl acetate/hexane: (30: 70) as the eluent; brown oil (86.0 mg, 0.246 mmol, 60%);  $^1\text{H}$  NMR (700 MHz,  $\text{CDCl}_3$ ) for major isomer: 7.66 (d,  $J$  = 7.1 Hz, 2H), 7.29~7.26 (m, 2H), 7.24 (d,  $J$  = 7.7 Hz, 2H), 7.21 ~ 7.16 (m, 3H), 6.86 (d,  $J$  = 8.4 Hz, 2H), 6.26 (s, 1H), 5.86 (s, 1H), 5.41 (s, 1H), 4.14 ~ 4.07 (m, 1H), 3.74 (s, 3H), 3.71 ~ 3.67 (m, 1H), 3.26 ~ 3.20 (m, 1H), 2.15 ~ 2.11 (m, 1H).;  $^1\text{H}$  NMR (700 MHz,  $\text{CDCl}_3$ ) for minor isomer: 7.72 (d,  $J$  = 7.7 Hz, 2H), 7.32 (t,  $J$  = 8.4 Hz, 2H), 6.82 (d,  $J$  = 9.1 Hz, 2H), 5.89 (s, 1H), 3.80~3.76 (m, 1H), 2.24 ~ 2.20 (m, 1H) rest of peaks are merged.;  $^{13}\text{C}$  NMR (175 MHz,  $\text{CDCl}_3$ ) for major isomer: 197.90, 158.7, 158.42, 149.94, 140.4, 138.3, 132.3, 130.0, 129.0, 128.8, 128.3, 128.0, 127.4, 127.1, 127.0, 126.8, 119.71, 114.2, 78.3, 62.51, 57.9, 55.23, 41.08.;  $^{13}\text{C}$  NMR (175 MHz,  $\text{CDCl}_3$ ) for minor isomer: 197.97, 158.9, 158.42, 149.96,

119.74, 114.46, 78.4, 62.59, 57.6, 55.23, 41.1, rest of carbons are merged.; HRMS-ESI+  $m/z$ :  $[M+Na]^+$  calcd for  $C_{21}H_{19}NO_4$ : 372.12118; found: 372.12115.

**Spectral Data for 3-((1*R*,2*S*)-2-(4-methoxyphenyl)-4-methylene-3-oxo-2-(*p*-tolyl)cyclobutyl)oxazolidin-2-one (3c):**

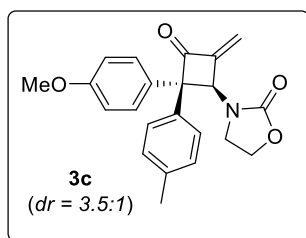

Compound **3c** (*diastereomeric ratio* 3.5:1) was purified on silica gel column using ethyl acetate/hexane: (25: 75) as the eluent; white solid (111 mg, 0.305 mmol, 76%);  $^1H$  NMR (700 MHz,  $CDCl_3$ ) for major isomer: 7.64 (d,  $J = 9.1$  Hz, 2H), 7.16 ~ 7.11 (m, 3H), 7.08 (d,  $J = 8.4$  Hz, 2H), 6.85 (d,  $J = 9.1$  Hz, 2H), 6.25 ~ 6.24 (m, 1H), 5.84 (s, 1H), 5.40 (s, 1H), 4.13 ~ 4.08 (m, 1H), 3.78 ~ 3.71 (m, 6H), 3.26 ~ 3.21 (m, 1H), 2.25 (s, 3H), 2.21 ~ 2.19 (m, 1H).;  $^1H$  NMR (700 MHz,  $CDCl_3$ ) for minor isomer: 7.59 (d,  $J = 8.4$  Hz, 1H), 6.81 (d,  $J = 8.4$  Hz, 1H), 5.86 (s, 1H), 2.26 (s, 3H), rest of peaks are merged with major isomer.;  $^{13}C$  NMR (175 MHz,  $CDCl_3$ ) for major isomer: 198.1, 158.7, 158.45, 150.0, 137.2, 135.3, 132.6, 130.2, 129.7, 129.5, 128.2, 128.01, 126.8, 126.7, 119.5, 114.2, 78.09, 62.54, 57.8, 55.23, 41.09, 21.01;  $^{13}C$  NMR (175 MHz,  $CDCl_3$ ) for minor isomer: 158.8, 158.42, 136.9, 119.6, 114.4, 78.1, 62.5, 57.7, 55.22, 41.15, 20.9, rest of carbons are merged; HRMS-ESI+  $m/z$ :  $[M+Na]^+$  calcd for  $C_{22}H_{21}NO_4$ : 386.13683; found: 386.13653.

**Spectral Data for 3-((1*R*,2*S*)-2-(4-methoxyphenyl)-4-methylene-2-(4-nitrophenyl)-3-oxocyclobutyl)oxazolidin-2-one (3d):**

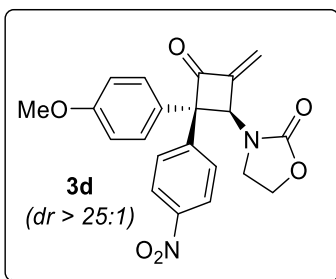

Compound **3d** (*diastereomeric ratio* > 25:1) was purified on silica gel column using ethyl acetate/hexane: (30: 70) as the eluent; yellow solid (90 mg, 0.228 mmol, 57%);  $^1H$  NMR (700 MHz,  $CDCl_3$ ):  $\delta$  7.62 (d,  $J = 8.4$  Hz, 2H), 7.42 (d,  $J = 8.4$  Hz, 2H), 7.15 (d,  $J = 8.4$  Hz, 2H), 6.86

(d,  $J = 8.4$  Hz, 2H), 6.28 (s, 1H), 5.85 (s, 1H), 5.44 (s, 1H), 4.17 ~ 4.13 (m, 1H), 3.82 ~ 3.79 (m, 1H), 3.74 (s, 3H), 3.30 ~ 3.26 (m, 1H), 2.29 ~ 2.26 (m, 1H);  $^{13}\text{C}$  NMR (175 MHz,  $\text{CDCl}_3$ ):  $\delta$ ; 197.3, 158.9, 158.4, 149.6, 137.4, 132.2, 131.8, 128.5, 128.2, 121.7, 120.3, 114.4, 77.6, 62.5, 57.9, 55.2, 41.2, rest of carbons are merged with aromatic region; HRMS (FD)  $m/z$ :  $[\text{M}]^+$  calcd for  $\text{C}_{21}\text{H}_{18}\text{NO}_6$ : 394.11703; found: 394.11758.

**Spectral Data for 3-((*1R,2R*)-2-(4-bromophenyl)-2-(4-methoxyphenyl)-4-methylene-3-oxocyclobutyl)oxazolidin-2-one (3e):**

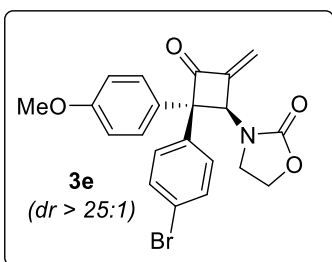

(Compound **3e**, *diastereomeric ratio*  $> 25:1$ ) was purified on silica gel column using ethyl acetate/hexane: (25: 75) as the eluent; brown solid (79.9 mg, 0.186 mmol, 46%);  $^1\text{H}$  NMR (700 MHz,  $\text{CDCl}_3$ ):  $\delta$  7.62 (d,  $J = 9.1$  Hz, 2H), 7.42 (d,  $J = 8.4$  Hz, 2H), 7.16 (d,  $J = 9.1$  Hz, 2H), 6.86 (d,  $J = 8.4$  Hz, 2H), 6.28 (dd,  $J = 2.1, 1.4$  Hz, 1H), 5.85 (t,  $J = 2.8$  Hz, 1H), 5.44 (dd,  $J = 1.4, 1.4$  Hz, 1H), 4.17 ~ 4.13 (m, 1H), 3.83 ~ 3.78 (m, 1H), 3.74 (s, 3H), 3.30 ~ 3.26 (m, 1H), 2.29 ~ 2.26 (m, 1H);  $^{13}\text{C}$  NMR (175 MHz,  $\text{CDCl}_3$ ):  $\delta$ ; 197.3, 158.9, 158.4, 149.6, 137.4, 132.2, 131.8, 128.5, 128.2, 121.7, 120.3, 114.4, 77.6, 62.5, 57.9, 55.2, 41.2, rest of carbons are merged with aromatic region; HRMS (FD)  $m/z$ :  $[\text{M}]^+$  calcd for  $\text{C}_{21}\text{H}_{18}\text{BrNO}_4$ : 427.04247; found: 427.04198.

**Spectral Data for 3-((*1R,2R*)-2-(3-methoxyphenyl)-2-(4-methoxyphenyl)-4-methylene-3-oxocyclobutyl)oxazolidin-2-one (3f):**

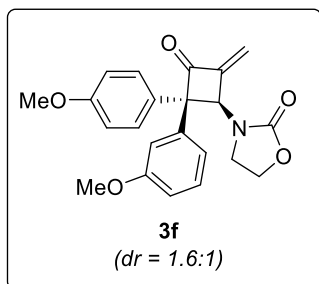

Compound **3f** (*diastereomeric ratio 1.6:1*) was purified on silica gel column using ethyl acetate/hexane: (20: 80) as the eluent; yellow solid (83.0 mg, 0.218 mmol, 54%); <sup>1</sup>H NMR (700 MHz, CDCl<sub>3</sub>) for major isomer: 7.66 (d, *J* = 9.1 Hz, 2H), 7.32 ~ 7.31(m, 1H), 7.23 ~ 7.17 (m, 3H), 6.87 ~ 6.84 (m, 3H), 6.82 (d, *J* = 8.4 Hz, 1H), 6.77 ~ 6.74 (m, 3H), 6.26 ~ 6.25 (m, 1H), 5.84 (s, 1H), 5.41 (s, 1H), 4.13 ~ 4.10 (m, 1H), 3.74 (s, 3H), 3.71 (s, 3H), 3.27 ~ 3.23 (m, 1H), 2.26 ~ 2.19 (m, 1H); <sup>1</sup>H NMR (700 MHz, CDCl<sub>3</sub>) for minor isomer: 5.87 (s, 1H), 5.40 (s, 1H), 4.13 ~ 4.10 (m, 1H), 3.81 ~ 3.78 (m, 3H), 3.73 (s, 3H) 3.27~3.23 (m, 1H), 2.26 ~ 2.19 (m, 1H), rest of peaks are merged with major isomer.; <sup>13</sup>C NMR (175 MHz, CDCl<sub>3</sub>) for major isomer: 197.6, 160.0, 158.8, 158.49, 149.9, 141.9, 139.7, 132.2, 130.0, 129.8, 128.2, 119.7, 118.8, 114.2, 113.4, 111.8, 78.2, 62.5, 57.92, 55.24, 55.20, 41.1; <sup>13</sup>C NMR (175 MHz, CDCl<sub>3</sub>) for minor isomer: 197.8, 159.8, 158.9, 158.44, 129.9, 128.0, 119.6, 119.2, 114.4, 113.3, 112.2, 78.4, 62.6, 57.94, 55.28, 55.24, other carbons are merged; HRMS-ESI+ *m/z*: [M+Na]<sup>+</sup> calcd for C<sub>22</sub>H<sub>21</sub>NO<sub>5</sub>: 402.13174; found:402.13187.

**Spectral Data for 3-((*1R,2R*)-2-(4-methoxyphenyl)-4-methylene-3-oxo-2-(m-tolyl)cyclobutyl)oxazolidin-2-one (3g):**

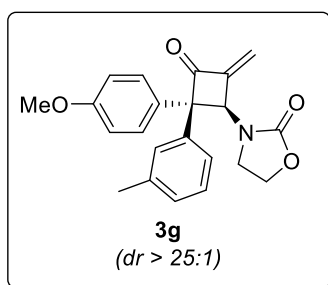

(Compound **3g**, *diastereomeric ratio* > 25:1) was purified on silica gel column using ethyl acetate/hexane: (30: 70) as the eluent; yellow oil (96.5 mg, 0.264 mmol, 66%); <sup>1</sup>H NMR (700 MHz, CDCl<sub>3</sub>): δ 7.65 (d, *J* = 8.4 Hz, 2H), 7.16 (*t*, *J* = 7.0 Hz, 1H), 7.04 ~ 7.01 (m, 3H), 6.87 (d, *J* = 8.4 Hz, 2H), 6.25 (d, *J* = 2.8 Hz, 1H), 5.85 (*t*, *J* = 2.8 Hz, 1H), 5.40 (s, 1H), 4.12 ~ 4.08 (m, 1H), 3.74 (s, 3H), 3.71 ~ 3.68 (m, 1H), 3.24 ~ 3.20 (m, 1H), 3.26 (s, 3H), 2.15 ~ 2.12 (m, 1H); <sup>13</sup>C NMR (175 MHz, CDCl<sub>3</sub>): δ; 198.0, 158.7, 158.4, 149.9, 138.8, 138.2, 132.4, 128.9, 128.28, 128.2, 127.2, 123.9, 119.5, 114.2, 78.3, 62.5, 57.8, 55.2, 41.0, 21.4, two carbons merged with aromatic region; HRMS (FD) *m/z*: [M]<sup>+</sup> calcd for C<sub>22</sub>H<sub>21</sub>NO<sub>4</sub>: 363.14761; found: 363.14750.

**Spectral Data for 3-((*1R,2R*)-2-(3-chlorophenyl)-2-(4-methoxyphenyl)-4-methylene-3-oxocyclobutyl)oxazolidin-2-one (3h):**

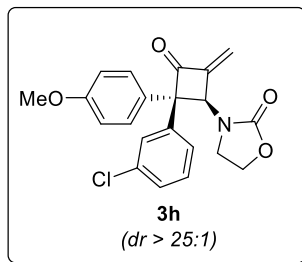

(Compound **3h**, *diastereomeric ratio* > 25:1) was purified on silica gel column using ethyl acetate/hexane: (25: 75) as the eluent; yellow solid (86 mg, 0.224 mmol, 56%); <sup>1</sup>H NMR (700 MHz, CDCl<sub>3</sub>): δ 7.64 (d, *J* = 9.1 Hz, 2H), 7.31 (s, 1H), 7.23 ~ 7.19 (m, 2H), 7.11 (d, *J* = 7.7 Hz, 1H), 6.88 (d, *J* = 8.4 Hz, 2H), 6.28 (t, *J* = 1.4 Hz, 1H), 5.86 (s, 1H), 5.44 (s, 1H), 4.17 ~ 4.14 (m, 1H), 3.81 ~ 3.77 (m, 1H), 3.75 (s, 3H), 3.31 ~ 3.27 (m, 1H), 2.25 ~ 2.22 (m, 1H); <sup>13</sup>C NMR (175 MHz, CDCl<sub>3</sub>): δ; 197.0, 159.0, 158.4, 149.5, 140.3, 134.8, 131.6, 130.3, 128.2, 127.7, 126.6, 125.3, 120.3, 114.4, 77.7, 62.5, 58.0, 55.2, 41.2, three carbons are merged with aromatic region; HRMS-ESI+ *m/z*: [M+Na]<sup>+</sup> calcd for C<sub>21</sub>H<sub>18</sub>ClNO<sub>4</sub>: 406.08220; found: 406.08235.

**Spectral Data for 3-((1*R*,2*R*)-2-(3-bromophenyl)-2-(4-methoxyphenyl)-4-methylene-3-oxocyclobutyl)oxazolidin-2-one (**3i**):**

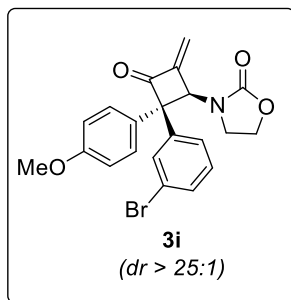

(Compound **3i**, *diastereomeric ratio* > 25:1) was purified on silica gel column using ethyl acetate/hexane: (15: 85) as the eluent; pale yellow solid (103.0 mg, 0.240 mmol, 60%); <sup>1</sup>H NMR (700 MHz, CDCl<sub>3</sub>): δ 7.63 (d, *J* = 8.4 Hz, 2H), 7.46 (s, 1H), 7.36 ~ 7.35 (m, 1H), 7.17 ~ 7.16 (m, 2H) 6.88 (d, *J* = 8.4 Hz, 2H), 6.28 (s, 1H), 5.86 (s, 1H), 5.44 (s, 1H), 4.17 ~ 4.14 (m, 1H), 3.82 ~ 3.77 (m, 1H), 3.75 (s, 3H), 3.31 ~ 3.27 (m, 1H), 2.24 ~ 2.21 (m, 1H); <sup>13</sup>C NMR (175 MHz, CDCl<sub>3</sub>): δ; 196.9, 159.0, 158.4, 149.5, 140.5, 131.6, 130.66, 130.64, 129.5, 128.2, 125.7, 122.9, 120.3, 114.4, 77.6, 62.5, 58.0, 55.2, 41.2, two carbons are merged with aromatic region; HRMS (FD) *m/z*: [M]<sup>+</sup> calcd for C<sub>21</sub>H<sub>18</sub>BrNO<sub>4</sub>: 427.0419; found: 427.0425.

**Spectral Data for 3-((1*R*,2*S*)-4-methylene-3-oxo-2-phenyl-2-(*p*-tolyl)cyclobutyl)oxazolidin-2-one (3j):**

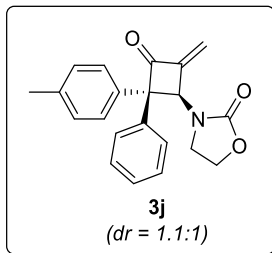

(Compound **3j**, *diastereomeric ratio 1.1:1*) was purified on silica gel column using ethyl acetate/hexane: (20: 80) as the eluent; colourless oil (81.0 mg, 0.242 mmol, 61%); <sup>1</sup>H NMR (700 MHz, CDCl<sub>3</sub>) for major isomer: 7.62 (d, *J* = 8.4 Hz, 2H), 7.28 ~ 7.25 (m, 4H), 7.14 (d, *J* = 7.7 Hz, 4H), 6.25 (s, 1H), 5.90 ~ 5.89 (m, 1H), 5.41 (s, 1H), 4.12 ~ 4.07 (m, 1H), 3.70 ~ 3.67 (m, 1H), 3.25 ~ 3.21 (m, 1H), 2.27 (s, 3H), 2.20 ~ 2.17 (m, 1H); <sup>1</sup>H NMR (700 MHz, CDCl<sub>3</sub>) for minor isomer: 7.73 (d, *J* = 7.7 Hz, 2H), 7.31 (t, *J* = 8.4 Hz, 2H), 7.21 ~ 7.18 (m, 2H), 7.09 (d, *J* = 8.4 Hz, 2H), 3.75 ~ 3.72 (m, 1H), 2.26 (s, 3H), 2.14 ~ 2.11 (m, 1H), rest of peaks are merged with major isomer; <sup>13</sup>C NMR (175 MHz, CDCl<sub>3</sub>) for major isomer: 197.8, 158.40, 149.84, 140.3, 138.2, 137.0, 135.0, 129.7, 129.5, 128.8, 127.4, 127.0, 126.9, 126.8, 126.7, 119.7, 78.70, 62.4, 57.7, 41.0, 20.95; <sup>13</sup>C NMR (175 MHz, CDCl<sub>3</sub>) for minor isomer: 197.9, 158.41, 149.8, 137.3, 137.2, 127.1, 119.6, 78.71, 62.5, 57.6, 41.0, 20.9, rest of carbons are merged; HRMS (FD) *m/z*: [M]<sup>+</sup> calcd for C<sub>21</sub>H<sub>19</sub>NO<sub>3</sub>: 333.13704; found: 333.13668.

**Spectral Data for 3-((1*R*,2*S*)-2-(4-butoxyphenyl)-4-methylene-3-oxo-2-phenylcyclobutyl)oxazolidin-2-one (3k):**

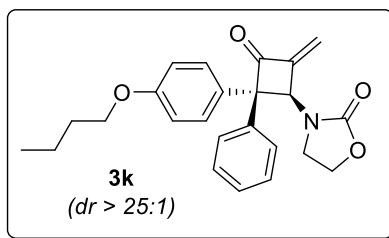

Compound **3k**, (*diastereomeric ratio* > 25:1) was purified on silica gel column using ethyl acetate/hexane: (15: 85) as the eluent; white solid (82.0 mg, 0.209 mmol, 52%); <sup>1</sup>H NMR (700 MHz, CDCl<sub>3</sub>): δ 7.62 (d, *J* = 8.4 Hz, 2H), 7.26 ~ 7.23 (m, 4H), 7.20 ~ 7.18 (m, 1H), 6.84 (d, *J* = 9.1 Hz, 2H), 6.25 (s, 1H), 5.85 (s, 1H), 5.40 (s, 1H), 4.09 ~ 4.06 (m, 1H), 3.88 (t, *J* = 6.3 Hz, 2H), 3.69 ~ 3.66 (m, 1H), 3.23 ~ 3.19 (m, 1H), 2.14 ~ 2.11 (m, 1H), 1.71 ~ 1.67 (m, 2H), 1.44 ~ 1.41

(m, 2H), 0.91 (t,  $J = 7.7$  Hz, 3H);  $^{13}\text{C}$  NMR (175 MHz,  $\text{CDCl}_3$ ):  $\delta$ ; 197.9, 158.4, 158.3, 149.9, 138.4, 132.0, 129.0, 128.2, 127.4, 126.8, 119.6, 114.8, 78.3, 67.6, 62.5, 57.9, 41.0, 31.2, 19.1, 13.7, four carbons merged with aromatic region; HRMS (FD)  $m/z$ :  $[\text{M}]^+$  calcd for  $\text{C}_{24}\text{H}_{25}\text{NO}_4$ : 391.17891; found: 391.17823.

**Spectral Data for 3-((*1R,2S*)-2-(4-chlorophenyl)-4-methylene-3-oxo-2-phenylcyclobutyl)oxazolidin-2-one (**3l**):**

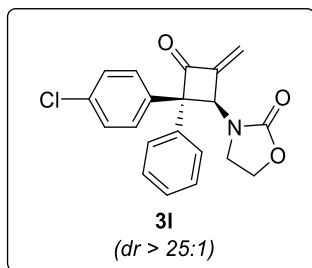

Compound **3l**, (*diastereomeric ratio* > 25:1) was purified on silica gel column using ethyl acetate/hexane: (20: 80) as the eluent; white solid (93 mg, 0.254 mmol, 63%);  $^1\text{H}$  NMR (700 MHz,  $\text{CDCl}_3$ ):  $\delta$  7.71 (d,  $J = 7.7$  Hz, 2H), 7.33 (t,  $J = 7.7$  Hz, 2H), 7.27 (d,  $J = 8.4$  Hz, 2H), 7.23 ~ 7.21 (m, 3H), 6.29 (s, 1H), 5.91 (s, 1H), 5.45 (s, 1H), 4.17 ~ 4.14 (m, 1H), 3.83 ~ 3.79 (m, 1H), 3.31 ~ 3.27 (m, 1H), 2.28 ~ 2.24 (m, 1H);  $^{13}\text{C}$  NMR (175 MHz,  $\text{CDCl}_3$ ):  $\delta$ ; 197.1, 158.3, 149.5, 139.7, 136.6, 133.7, 129.2, 129.0, 128.2, 127.5, 126.9, 120.4, 78.2, 62.5, 57.8, 41.2, four carbons are merged with aromatic region; HRMS-ESI+  $m/z$ :  $[\text{M}+\text{Na}]^+$  calcd for  $\text{C}_{20}\text{H}_{16}\text{ClNO}_3$ : 376.07164; found: 376.07177.

**Spectral Data for (*R*)-3-(4-methylene-3-oxo-2,2-diphenylcyclobutyl)oxazolidin-2-one (**3m**):**

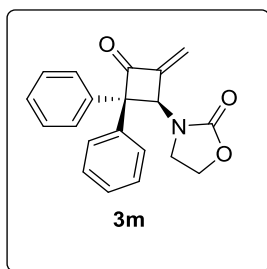

(Compound **3m**) was purified on silica gel column using ethyl acetate/hexane: (15: 85) as the eluent; yellow oil (91.0 mg, 0.284 mmol, 71%);  $^1\text{H}$  NMR (700 MHz,  $\text{CDCl}_3$ ):  $\delta$  7.75 (d,  $J = 7.7$  Hz, 2H), 7.33 (t,  $J = 7.7$  Hz, 2H), 7.29 ~ 7.25 (m, 4H), 7.22 ~ 7.20 (m, 2H), 6.26 (s, 1H), 5.92 (s, 1H), 5.42 (s, 1H), 4.11 ~ 4.08 (m, 1H), 3.72 ~ 3.68 (m, 1H), 3.25 ~ 3.21 (m, 1H), 2.14 ~ 2.10 (m,

1H); <sup>13</sup>C NMR (175 MHz, CDCl<sub>3</sub>): δ; 197.6, 158.4, 149.7, 140.1, 138.0, 129.0, 128.8, 127.5, 127.2, 127.0, 126.9, 119.8, 79.0, 62.5, 57.7, 41.0, one carbon is merged with aromatic region; HRMS-ESI+ m/z: [M+Na]<sup>+</sup> calcd for C<sub>20</sub>H<sub>17</sub>NO<sub>4</sub>: 342.11061; found: 342.11023.

**Spectral Data for *N*-((1*R*,2*S*)-2-(4-methoxyphenyl)-4-methylene-3-oxo-2-phenylcyclobutyl)-*N*,4-dimethylbenzenesulfonamide (4b):**

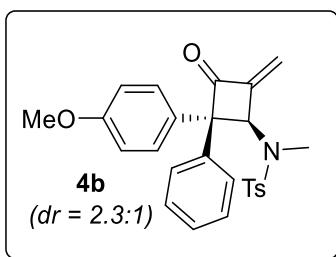

Compound **4b**, (*diastereomeric ratio 2.3:1*) was purified on silica gel column using ethyl acetate/hexane: (12: 88) as the eluent; yellow solid (65.2 mg, 0.145 mmol, 65%); <sup>1</sup>H NMR (700 MHz, CDCl<sub>3</sub>) for major isomer: 7.77 ~ 7.75 (m, 2H), 7.64 (d, *J* = 9.1 Hz, 2H), 7.40 (d, *J* = 7.7 Hz, 2H), 7.32 ~ 7.31 (m, 3H), 7.27 ~ 7.23 (m, 2H), 6.87 (d, *J* = 8.4 Hz, 2H), 5.95 (t, *J* = 2.8 Hz, 1H), 5.89 (d, *J* = 2.8 Hz, 1H), 4.14 (d, *J* = 1.4 Hz, 1H), 3.74 (s, 3H), 2.42 (s, 3H), 2.01 (s, 3H). <sup>1</sup>H NMR (700 MHz, CDCl<sub>3</sub>) for minor isomer: 7.71(d, *J* = 7.7 Hz, 2H), 7.20 ~ 7.17 (m, 2H), 6.81 (d, *J* = 9.1 HZ, 2H), 5.97 (t, *J* = 2.1 Hz, 1H), 4.12 (d, *J* = 2.1 Hz, 1H), 3.73 (s, 3H), 2.05 (s, 3H), rest of peaks are merged with major isomer.; <sup>13</sup>C NMR (175 MHz, CDCl<sub>3</sub>) for major isomer: 197.9, 158.6, 149.85, 143.94, 141.9, 138.01, 135.9, 133.8, 129.9, 128.8, 128.2, 127.7, 127.1, 127.0, 126.4, 119.0, 114.3, 76.9, 61.9, 55.2, 30.9, 21.5, three carbons merged with aromatic region; <sup>13</sup>C NMR (175 MHz, CDCl<sub>3</sub>) for minor isomer: 198.03, 158.7, 149.82, 143.95, 135.8, 128.8, 127.2, 127.1, 119.05, 114.2, 61.6, 55.1, 31.05, other carbons merged with major isomer.; HRMS-ESI+ m/z: [M+Na]<sup>+</sup> calcd for C<sub>26</sub>H<sub>25</sub>NO<sub>4</sub>S: 470.14020; found: 470.14006.

**Spectral Data for *N*-cyclopropyl-*N*-((1*R*,2*S*)-2-(4-methoxyphenyl)-4-methylene-3-oxo-2-phenylcyclobutyl)-4-methylbenzenesulfonamide (4c):**



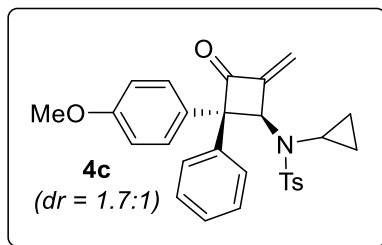

Compound **4c**, (*diastereomeric ratio 1.7:1*) was purified on silica gel column using ethyl acetate/hexane: (15: 85) as the eluent; yellow solid (68.5 mg, 0.144 mmol, 72%);  $^1\text{H}$  NMR (700 MHz,  $\text{CDCl}_3$ ) for major isomer: 7.83 ~ 7.82 (m, 2H), 7.67 (d,  $J = 9.1$  Hz, 2H), 7.62 (d,  $J = 7.0$  Hz, 2H), 7.35 (d,  $J = 7.7$  Hz, 2H), 7.27 (t,  $J = 7.7$  Hz, 2H), 7.18 ~ 7.14 (m, 1H), 6.85 (d,  $J = 11.9$  Hz, 2H), 5.94 ~ 5.92 (m, 1H), 5.90 ~ 5.89 (m, 1H), 4.38 (s, 1H), 3.73 (s, 3H), 2.44 (s, 3H), 1.65 ~ 1.62 (s, 1H), 0.75 ~ 0.71 (m, 1H), 0.63 ~ 0.56 (m, 1H), 0.01 ~ -0.04 (m, 1H), -0.47 ~ -0.50 (m, 1H);  $^1\text{H}$  NMR (700 MHz,  $\text{CDCl}_3$ ) for minor isomer: 7.73 (d,  $J = 7.7$  Hz, 2H), 7.56 (d,  $J = 8.4$  Hz, 2H), 7.30 (t,  $J = 7.7$  Hz, 2H), 6.82 (d,  $J = 7$  Hz, 2H), 0.81 ~ 0.78 (m, 1H), -0.38 ~ -0.42 (m, 1H), rest of peaks are merged with major isomer;  $^{13}\text{C}$  NMR (175 MHz,  $\text{CDCl}_3$ ) for major isomer: 197.70, 158.6, 149.67, 144.0, 142.7, 139.7, 135.15, 134.5, 131.6, 129.8, 129.0, 128.39, 127.5, 127.0, 126.9, 126.3, 118.64, 114.4, 113.8, 77.4, 65.3, 55.2, 29.5, 21.5, 9.51, three carbons are merged with major isomer;  $^{13}\text{C}$  NMR (175 MHz,  $\text{CDCl}_3$ ) for minor isomer: 197.8, 158.4, 149.69, 135.12, 128.34, 126.8, 118.60, 65.1, 55.1, 29.7, 9.6, rest of carbons are merged.; HRMS-ESI+  $m/z$ :  $[\text{M}+\text{Na}]^+$  calcd for  $\text{C}_{28}\text{H}_{27}\text{NO}_4\text{S}$ : 496.15585; found: 496.15548.

**Spectral data for N-cyclohexyl-N-((1R,2S)-2-(4-methoxyphenyl)-4-methylene-3-oxo-2-phenylcyclobutyl)-4-methylbenzenesulfonamide (4d)**

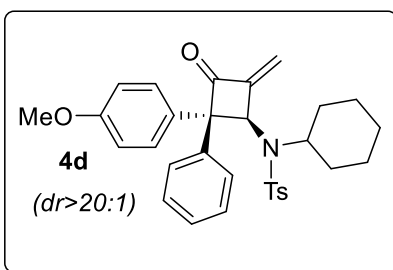

Compound **4d**, (*diastereomeric ratio 20:1*) was purified on silica gel column using ethyl acetate/hexane: (15: 85) as the eluent; pale yellow solid (65.5 mg, 0.127 mmol, 74%);  $^1\text{H}$  NMR (700 MHz,  $\text{CDCl}_3$ ); 7.82 (s, 2H), 7.46 (d,  $J = 8.4$  Hz, 2H), 7.33 ~ 7.28 (m, 4H), 7.26 ~ 7.24 (m, 2H), 7.17 (t,  $J = 7$  Hz, 1H), 6.82 (d,  $J = 9.1$  Hz, 2H), 6.04 (s, 1H), 5.71 (s, 1H), 4.92 (s, 1H), 3.74

(s, 3H), 2.50 ~ 2.45 (m, 1H), 2.43 (s, 3H), 1.86 ~ 1.81 (m, 1H), 1.66 ~ 1.59 (m, 2H), 1.48 (s, 1H), 1.41 ~ 1.37 (m, 1H), 1.29 ~ 1.37 (m, 2H), 0.98 ~ 0.86 (m, 2H), 0.57 ~ 0.50 (m, 1H);  $^{13}\text{C}$  NMR (175 MHz,  $\text{CDCl}_3$ ); 194.5, 158.6, 152.2, 143.4, 139.1, 133.7, 129.6, 128.6, 128.0, 127.7, 119.5, 114.2, 78.3, 63.5, 62.1, 55.2, 32.6, 32.2, 28.8, 27.1, 26.6, 25.2, 21.5 rest of carbons are merged; HRMS-ESI+ calcd for  $\text{C}_{31}\text{H}_{33}\text{NO}_4\text{S}$   $[\text{M}+\text{Na}]^+$ : 538.20280, found: 538.20302

**Spectral data for N-isopropyl-N-((1R,2S)-2-(4-methoxyphenyl)-4-methylene-3-oxo-2-phenylcyclobutyl)-4-methylbenzenesulfonamide (4e);**

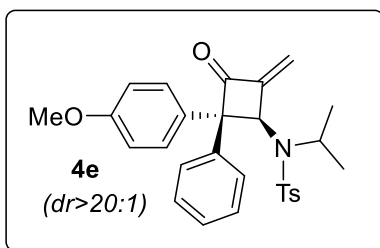

Compound **4e**, (*diastereomeric ratio 20:1*) was purified on silica gel column using ethyl acetate/hexane: (15: 85) as the eluent; yellow solid (55.9 mg, 0.117 mmol, 59%);  $^1\text{H}$  NMR (700 MHz,  $\text{CDCl}_3$ ); 7.81 ~ 7.80 (m, 2H), 7.51 (d,  $J = 7.7$  Hz, 1H), 7.44 (d,  $J = 8.4$  Hz, 1H), 7.36 (d,  $J = 7.7$  Hz, 1H), 7.31 ~ 7.25 (m, 5H), 7.17 (t,  $J = 7$  Hz, 1H), 6.82 ~ 6.79 (m, 2H), 6.04 (d,  $J = 2.8$  Hz, 1H), 5.70 (d,  $J = 13.3$  Hz, 1H), 4.94 (s, 1H), 3.73 (s, 3H), 3.03 ~ 2.98 (m, 1H), 2.43 (s, 3H), 1.16 ~ 1.14 (m, 3H), 0.56 ~ 0.47 (m, 3H);  $^{13}\text{C}$  NMR (175 MHz,  $\text{CDCl}_3$ ) for major isomer: 198.5, 158.6, 152.0, 143.4, 141.9, 138.9, 138.8, 133.7, 130.8, 129.5, 129.0, 128.5, 128.5, 127.8, 127.9, 127.7, 127.6, 126.6, 119.6, 114.2, 78.0, 63.5, 55.1, 53.0, 22.0, 21.4, two carbons are merged.  $^{13}\text{C}$  NMR (175 MHz,  $\text{CDCl}_3$ ) for minor isomer: 198.8, 128.9, 127.11, 114.0, 78.4, 22.2, rest of carbons are merged. HRMS-ESI+ calcd for  $\text{C}_{28}\text{H}_{29}\text{NO}_4\text{S}$   $[\text{M}+\text{Na}]^+$ : 498.17150, found: 498.17089.

**Spectral Data for N-butyl-N-((1R,2S)-2-(4-methoxyphenyl)-4-methylene-3-oxo-2-phenylcyclobutyl)-4-methylbenzenesulfonamide (4f);**

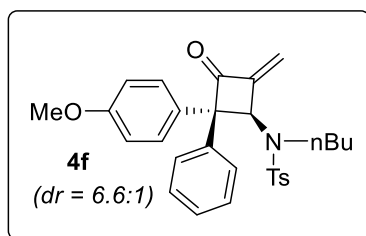

Compound **4f**, (*diastereomeric ratio 6.6:1*) was purified on silica gel column using ethyl acetate/hexane: (15: 85) as the eluent; pale yellow solid (72.0 mg, 0.147 mmol, 78%); <sup>1</sup>H NMR (700 MHz, CDCl<sub>3</sub>) for major isomer: 7.80 (d, *J* = 7.7 Hz, 2H), 7.61 (d, *J* = 8.4 Hz, 2H), 7.38 (d, *J* = 7.0 Hz, 2H), 7.33 ~ 7.25 (m, 5H), 7.19 ~ 7.17 (m, 1H), 6.85 (d, *J* = 8.4 Hz, 2H), 5.92 (s, 1H), 4.34 (s, 1H), 3.74 (s, 3H), 2.59 ~ 2.54 (m, 1H), 2.43 (s, 3H), 2.32 ~ 2.28 (m, 1H), 1.27 ~ 1.22 (m, 1H), 0.81 ~ 0.78 (m, 1H), 0.66 ~ 0.62 (m, 1H), 0.60 ~ 0.54 (m, 3H), 0.35 ~ 0.32 (m, 1H); <sup>1</sup>H NMR (700 MHz, CDCl<sub>3</sub>) for minor isomer: 7.68 (d, *J* = 7.7 Hz, 2H), 6.81 (d, *J* = 9.1 Hz, 2H), 3.73 (s, 1H), 0.47 ~ 0.41 (m, 1H) rest of peaks are merged with major isomer; <sup>13</sup>C NMR (175 MHz, CDCl<sub>3</sub>) for major isomer: 198.7, 158.6, 151.2, 143.8, 138.3, 136.8, 134.05, 129.9, 128.7, 127.9, 127.7, 127.3, 127.1, 119.1, 114.2, 77.8, 63.8, 55.2, 47.6, 31.2, 21.5, 20.3, 13.3, six carbons are merged; HRMS-ESI+ calcd for C<sub>29</sub>H<sub>31</sub>NO<sub>4</sub>S [M+Na]<sup>+</sup>: 512.18715, found: 512.18748.

**Spectral data for N-((1R,2S)-2-(4-methoxyphenyl)-4-methylene-3-oxo-2-phenylcyclobutyl)-N-methylmethanesulfonamide (4g)**

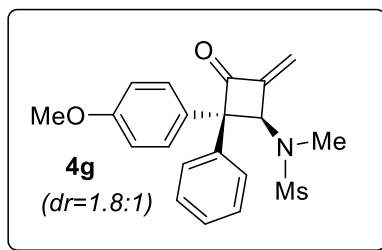

Compound **4g**, (*diastereomeric ratio 1.8:1*) was purified on silica gel column using ethyl acetate/hexane: (12: 88) as the eluent; yellow oil (85.8 mg, 0.230 mmol, 68%); <sup>1</sup>H NMR (700 MHz, CDCl<sub>3</sub>) for major isomer: 7.57 (d, *J* = 9.1 Hz, 2H), 7.35 ~ 7.18 (m, 5H), 6.84 ~ 6.81 (m, 2H), 6.27 (s, 1H), 5.95 (s, 1H), 5.31 (s, 1H), 3.73 (s, 3H), 2.91 (s, 3H), 2.12 (s, 3H); <sup>1</sup>H NMR (700 MHz, CDCl<sub>3</sub>) for minor isomer: 7.65 (d, *J* = 7.7 Hz, 2H), 5.97 (s, 1H), 2.93 (s, 3H), 2.17 (s, 3H) rest of peaks are merged with major isomer; <sup>13</sup>C NMR (175 MHz, CDCl<sub>3</sub>) for major isomer: 198.11, 158.6, 150.65, 141.2, 138.0, 133.1, 129.7, 128.82, 128.4, 127.8, 127.2, 127.1, 126.5, 119.0, 114.25, 77.6, 61.5, 55.2, 38.1, 30.6; <sup>13</sup>C NMR (175 MHz, CDCl<sub>3</sub>) for minor isomer: 198.17, 158.8, 150.64, 128.85, 127.3, 114.28, 77.7, 61.2, 55.1, 38.0, 30.7 rest of the carbons are merged.; HRMS-ESI- calcd for C<sub>20</sub>H<sub>21</sub>NO<sub>4</sub>S [M-H]: 370.11130, found: 370.11098.

**Spectral data for N-(4-(tert-butyl)phenyl)-N-((1R,2S)-2-(4-methoxyphenyl)-4-methylene-3-oxo-2-phenylcyclobutyl)methanesulfonamide (4h)**

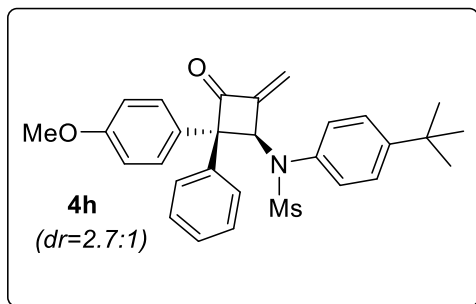

Compound **4h**, (*diastereomeric ratio 2.7:1*) was purified on silica gel column using ethyl acetate/hexane: (15: 85) as the eluent; white solid (57.2 mg, 0.116 mmol, 62%);  $^1\text{H NMR}$  (700 MHz,  $\text{CDCl}_3$ ) for major isomer: 7.62 (d,  $J = 8.4$  Hz, 2H), 7.37 (d,  $J = 7.7$  Hz, 2H), 7.33 ~ 7.20 (m, 3H), 7.14 ~ 7.11 (m, 2H), 6.86 ~ 6.83 (m, 2H), 6.50 (d,  $J = 7.7$  Hz, 2H), 6.25 (s, 1H), 6.07 (s, 1H), 5.31 (s, 1H), 3.75 (s, 3H), 2.68 (s, 3H), 1.23 (s, 9H);  $^1\text{H NMR}$  (700 MHz,  $\text{CDCl}_3$ ) for minor isomer: 7.69 (d,  $J = 7.7$  Hz, 2H), 6.56 (d,  $J = 7.7$  Hz, 2H), 6.28 (s, 1H), 3.78 (s, 3H), 2.73 (s, 3H) other peaks are merged;  $^{13}\text{C NMR}$  (175 MHz,  $\text{CDCl}_3$ ) for major isomer: 198.7, 158.7, 152.0, 151.07, 140.9, 139.2, 133.5, 132.7, 131.65, 131.1, 129.9, 128.81, 128.5, 128.4, 127.3, 127.2, 127.1, 125.92, 121.63, 114.2, 79.1, 63.9, 55.2, 39.6, 34.59, 31.17, three carbons are merged;  $^{13}\text{C NMR}$  (175 MHz,  $\text{CDCl}_3$ ) for minor isomer: 198.9, 158.8, 151.9, 151.1, 133.6, 131.61, 128.85, 125.93, 121.60, 113.8, 79.3, 63.7, 55.3, 39.7, 34.58, 31.18, rest of carbons are merged; HRMS-ESI+ calcd for  $\text{C}_{29}\text{H}_{31}\text{NO}_4\text{S}$  [ $\text{M}+\text{Na}$ ] $^+$ : 512.18715, found: 512.18737.

**Spectral data for 4-methoxy-N-((1R,2S)-2-(4-methoxyphenyl)-4-methylene-3-oxo-2-phenylcyclobutyl)-N-phenylbenzenesulfonamide (4i)**

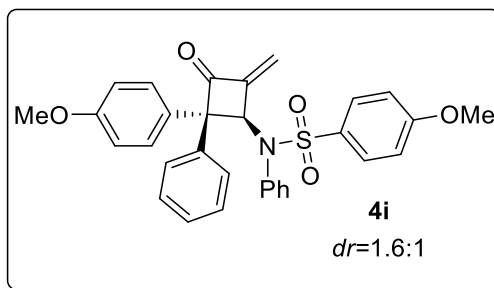

Compound **4i**, (*diastereomeric ratio 1.6:1*) was purified on silica gel column using ethyl acetate/hexane: (20: 80) as the eluent; white solid (65 mg, 0.162 mmol, 77%);  $^1\text{H NMR}$  (700 MHz,  $\text{CDCl}_3$ ) for major isomer: 7.65 ~ 7.64 (m, 2H), 7.59 ~ 7.56 (m, 2H), 7.30 ~ 7.28 (m, 2H), 7.23 ~ 7.17 (m, 3H), 7.08 ~ 7.05 (m, 1H), 6.94 ~ 6.86 (m, 6H), 6.34 (dd,  $J = 2.1$  Hz, 1H), 6.12 (d,  $J = 8.4$  Hz, 2H), 5.99 (s, 1H), 4.95 (s, 1H), 3.83 (s, 3H), 3.74 (s, 3H);  $^1\text{H NMR}$  (700 MHz,  $\text{CDCl}_3$ ) for

minor isomer: 7.72 (d,  $J = 7.7$  Hz, 2H), 7.33 (t,  $J = 7.7$  Hz, 2H), 6.75 (dd,  $J = 1.4$  Hz, 2H), 6.20 (d,  $J = 7.7$  Hz, 2H), 4.93 (s, 3H), 3.75 (s, 3H), rest of peaks are merged with major isomer;  $^{13}\text{C}$  NMR (175 MHz,  $\text{CDCl}_3$ ) for major isomer: 198.5, 163.11, 158.71, 151.90, 141.68, 138.84, 136.0, 133.5, 132.58, 131.5, 130.7, 129.8, 129.4, 128.9, 128.5, 128.21, 128.0, 127.0, 126.9, 121.07, 114.3, 114.0, 113.9, 78.6, 64.1, 55.6, 55.23, three carbons are merged;  $^{13}\text{C}$  NMR (175 MHz,  $\text{CDCl}_3$ ) for minor isomer: 198.8, 163.12, 158.78, 151.97, 141.69, 138.85, 136.2, 132.51, 131.6, 128.24, 127.1, 121.02, 114.03, 78.8, 64.0, 55.27, rest of carbons are merged; HRMS-ESI+ calcd for  $\text{C}_{31}\text{H}_{27}\text{NO}_5\text{S}$   $[\text{M}+\text{Na}]^+$ : 548.15076, found: 548.15126.

**Spectral data for N-isopropyl-N-((1R,2S,4S)-2-(4-methoxyphenyl)-4-methyl-3-oxo-2-phenylcyclobutyl)-4-methylbenzenesulfonamide (5a)**

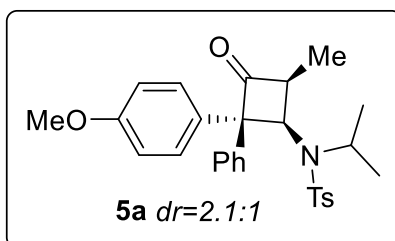

Compound **5a**, (*diastereomeric ratio 2.1:1*) was purified on silica gel column using ethyl acetate/hexane: (10: 90) as the eluent; colourless oil (57 mg, 0.043 mmol, 42%);  $^1\text{H}$  NMR (700 MHz,  $\text{CDCl}_3$ ) for major isomer: 7.76 ~ 7.75 (m, 2H), 7.33 (d,  $J = 9.1$  Hz, 2H), 7.28 ~ 7.23 (m, 5H), 7.21 ~ 7.14 (m, 2H), 6.80 ~ 6.78 (m, 2H), 4.87 ~ 4.85 (m, 1H), 3.76 ~ 3.74 (m, 3H), 3.54 ~ 3.46 (m, 1H), 3.01 ~ 2.94 (m, 1H), 2.41 (s, 3H), 1.20 ~ 1.17 (m, 3H), 0.99 (d,  $J = 7$  Hz, 3H), 0.87 (d,  $J = 7$  Hz, 3H);  $^1\text{H}$  NMR (700 MHz,  $\text{CDCl}_3$ ) for minor isomer: 7.38 (d,  $J = 7.7$  Hz, 2H), 7.07 (d,  $J = 9.1$  Hz, 2H), 3.05 ~ 3.01 (m, 1H), 0.95 (d,  $J = 6.3$  Hz, 3H), rest of peaks are merged with major isomer;  $^{13}\text{C}$  NMR (175 MHz,  $\text{CDCl}_3$ ) for major isomer: 210.74, 158.4, 143.5, 141.8, 138.64, 133.8, 130.3, 129.5, 129.3, 128.7, 128.1, 127.9, 127.2, 126.7, 113.9, 77.9, 61.9, 55.46, 55.1, 51.91, 22.2, 22.10, 21.4, 13.4, four carbons are merged;  $^{13}\text{C}$  NMR (175 MHz,  $\text{CDCl}_3$ ) for minor isomer: 210.73, 158.7, 138.62, 128.5, 126.8, 114.1, 78.01, 61.6, 55.42, 55.2, 51.94, 22.4, 22.15, 13.3, rest of carbons are merged; HRMS-ESI+ calcd for  $\text{C}_{28}\text{H}_{31}\text{NO}_4\text{S}$   $[\text{M}+\text{Na}]^+$ : 500.18715, found: 500.18661.

**Spectral data for N-((1R,2S,3S,4R)-3-hydroxy-2-(4-methoxyphenyl)-4-methyl-2-phenylcyclobutyl)-N,4-dimethylbenzenesulfonamide (5b)**

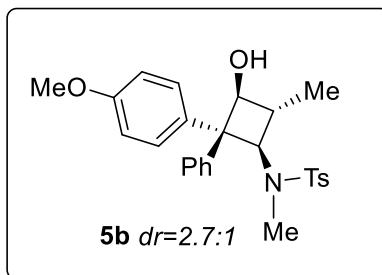

Compound **5b**, (*diastereomeric ratio 2.7:1*) was purified on silica gel column using ethyl acetate/hexane: (30: 70) as the eluent; colourless oil (31 mg, 0.070 mmol, 63%);  $^1\text{H NMR}$  (700 MHz,  $\text{CDCl}_3$ ) for major isomer: 7.68 ~ 7.67 (m, 2H), 7.65 (d,  $J = 7.7$  Hz, 2H), 7.51 (d,  $J = 8.4$  Hz, 2H), 7.27 ~ 7.24 (m, 3H), 7.20 (t,  $J = 7.7$  Hz, 2H), 6.86 (d,  $J = 9.1$  Hz, 2H), 4.27 ~ 4.25 (m, 1H), 3.78 (s, 3H), 3.74 (s, 1H), 2.70 ~ 2.62 (m, 1H), 2.46 (s, 1H), 2.39 (s, 3H), 1.91 (s, 3H), 0.68 (d,  $J = 6.3$  Hz, 3H);  $^1\text{H NMR}$  (700 MHz,  $\text{CDCl}_3$ ) for minor isomer: 7.58 ~ 7.56 (m, 2H), 7.32 (t,  $J = 7.7$  Hz, 2H), 7.16 ~ 7.14 (m, 2H), 6.76 (d,  $J = 8.4$  Hz, 2H), 1.97 (s, 3H), rest of peaks are merged with major isomer;  $^{13}\text{C NMR}$  (175 MHz,  $\text{CDCl}_3$ ) for major isomer: 157.7, 149.3, 143.3, 141.6, 140.5, 135.8, 131.5, 130.4, 129.7, 129.5, 128.5, 127.8, 127.45, 127.3, 127.2, 126.2, 126.1, 113.8, 80.0, 62.1, 58.4, 55.2, 41.14, 31.1, 21.4, 16.69;  $^{13}\text{C NMR}$  (175 MHz,  $\text{CDCl}_3$ ) for minor isomer: 157.9, 132.2, 127.47, 126.0, 113.3, 79.6, 62.0, 58.1, 55.1, 41.12, 31.2, 16.66, rest of carbons are merged; HRMS-ESI+ calcd for  $\text{C}_{26}\text{H}_{29}\text{NO}_4\text{S}$   $[\text{M}+\text{Na}]^+$ : 474.17150, found: 474.17158.

## 7. X-ray crystallographic structure and data for compound (3i, 3l, 3m and 4f):

### (a) X-ray crystallographic data of compound (3i):

Ellipsoid contour % probability level = 50%

**Experimental:** The sample was dissolved in appropriate amount of Dichloromethane followed by the addition of pentane to furnish a saturated solution. Afterwards, the mixture was allowed to stand at room temperature to form the crystals.

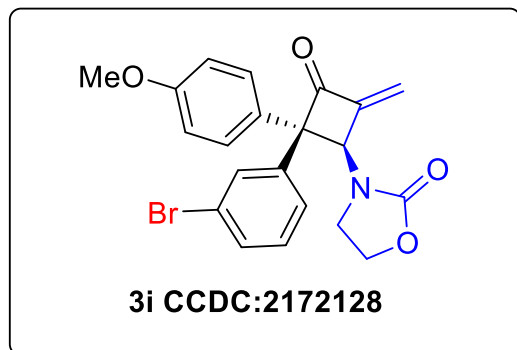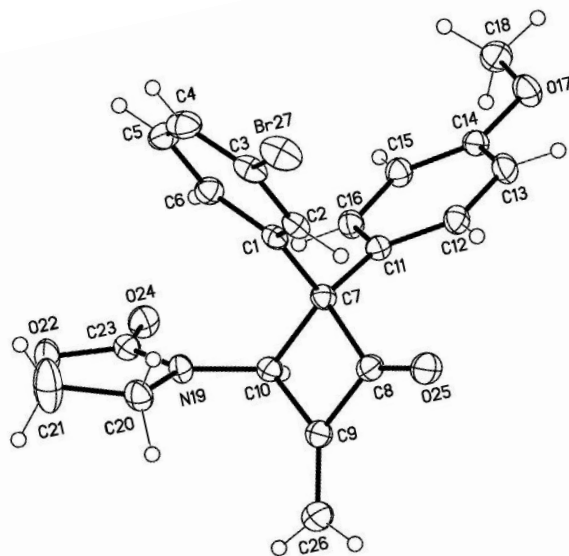

## 220428lt\_auto

**Table S1 Crystal data and structure refinement for 220428lt\_auto.**

|                     |                                                   |
|---------------------|---------------------------------------------------|
| Identification code | 220428lt_auto                                     |
| Empirical formula   | C <sub>21</sub> H <sub>18</sub> BrNO <sub>4</sub> |
| Formula weight      | 428.27                                            |
| Temperature/K       | 100.00(10)                                        |
| Crystal system      | triclinic                                         |
| Space group         | P-1                                               |

|                                             |                                                                |
|---------------------------------------------|----------------------------------------------------------------|
| a/Å                                         | 8.5723(2)                                                      |
| b/Å                                         | 10.1918(3)                                                     |
| c/Å                                         | 10.7219(3)                                                     |
| $\alpha$ /°                                 | 91.770(2)                                                      |
| $\beta$ /°                                  | 98.537(2)                                                      |
| $\gamma$ /°                                 | 96.489(2)                                                      |
| Volume/Å <sup>3</sup>                       | 919.34(4)                                                      |
| Z                                           | 2                                                              |
| $\rho_{\text{calcd}}$ /cm <sup>3</sup>      | 1.547                                                          |
| $\mu$ /mm <sup>-1</sup>                     | 3.282                                                          |
| F(000)                                      | 436.0                                                          |
| Crystal size/mm <sup>3</sup>                | 0.05 × 0.04 × 0.04                                             |
| Radiation                                   | Cu K $\alpha$ ( $\lambda$ = 1.54184)                           |
| 2 $\theta$ range for data collection/°      | 8.348 to 149.922                                               |
| Index ranges                                | -10 ≤ h ≤ 10, -11 ≤ k ≤ 12, -13 ≤ l ≤ 12                       |
| Reflections collected                       | 10098                                                          |
| Independent reflections                     | 3579 [ $R_{\text{int}}$ = 0.0236, $R_{\text{sigma}}$ = 0.0280] |
| Data/restraints/parameters                  | 3579/0/245                                                     |
| Goodness-of-fit on F <sup>2</sup>           | 1.063                                                          |
| Final R indexes [ $I \geq 2\sigma(I)$ ]     | $R_1$ = 0.0296, $wR_2$ = 0.0722                                |
| Final R indexes [all data]                  | $R_1$ = 0.0344, $wR_2$ = 0.0743                                |
| Largest diff. peak/hole / e Å <sup>-3</sup> | 0.37/-0.54                                                     |



**Table S2 Fractional Atomic Coordinates ( $\times 10^4$ ) and Equivalent Isotropic Displacement Parameters ( $\text{\AA}^2 \times 10^3$ ) for 220428lt\_auto.  $U_{\text{eq}}$  is defined as 1/3 of the trace of the orthogonalised  $U_{\text{IJ}}$  tensor.**

| Atom | <i>x</i>   | <i>y</i>    | <i>z</i>    | $U(\text{eq})$ |
|------|------------|-------------|-------------|----------------|
| Br27 | 4948.9 (3) | 2240.5 (2)  | 6479.6 (2)  | 32.73 (9)      |
| C1   | 4224 (2)   | 6134 (2)    | 7152.3 (18) | 17.7 (4)       |
| C2   | 4039 (3)   | 4760 (2)    | 7034.2 (19) | 19.8 (4)       |
| C3   | 5245 (3)   | 4113 (2)    | 6653.1 (19) | 23.6 (5)       |
| C4   | 6639 (3)   | 4795 (2)    | 6402 (2)    | 27.7 (5)       |
| C5   | 6809 (3)   | 6166 (2)    | 6504 (2)    | 27.1 (5)       |
| C6   | 5617 (2)   | 6837 (2)    | 6864 (2)    | 20.9 (4)       |
| C7   | 2935 (2)   | 6886.7 (19) | 7547.6 (19) | 17.0 (4)       |
| C8   | 1778 (2)   | 6097 (2)    | 8314 (2)    | 19.9 (4)       |
| C9   | 2286 (2)   | 7003 (2)    | 9451 (2)    | 20.4 (4)       |
| C10  | 3457 (2)   | 7849 (2)    | 8778.6 (19) | 17.6 (4)       |
| C11  | 2108 (2)   | 7526 (2)    | 6409.3 (19) | 18.3 (4)       |
| C12  | 878 (2)    | 6781 (2)    | 5591 (2)    | 20.0 (4)       |
| C13  | 201 (3)    | 7292 (2)    | 4487 (2)    | 22.8 (4)       |
| C14  | 746 (2)    | 8559 (2)    | 4165.3 (19) | 20.4 (4)       |
| C15  | 1939 (2)   | 9327 (2)    | 4986 (2)    | 20.7 (4)       |
| C16  | 2608 (2)   | 8799 (2)    | 6096.2 (19) | 20.0 (4)       |
| C18  | 654 (3)    | 10190 (2)   | 2612 (2)    | 28.1 (5)       |
| C20  | 5832 (3)   | 7001 (2)    | 10145 (2)   | 23.8 (5)       |
| C21  | 7494 (3)   | 7704 (3)    | 10529 (3)   | 46.3 (8)       |
| C23  | 6093 (2)   | 9073 (2)    | 9280.9 (19) | 20.8 (4)       |
| C26  | 1876 (3)   | 7030 (2)    | 10594 (2)   | 28.4 (5)       |
| N19  | 5092 (2)   | 7965.4 (16) | 9360.5 (16) | 18.3 (4)       |

**Table S2 Fractional Atomic Coordinates ( $\times 10^4$ ) and Equivalent Isotropic Displacement Parameters ( $\text{\AA}^2 \times 10^3$ ) for 220428lt\_auto.  $U_{\text{eq}}$  is defined as 1/3 of the trace of the orthogonalised  $U_{\text{IJ}}$  tensor.**

| Atom | $x$         | $y$          | $z$         | $U(\text{eq})$ |
|------|-------------|--------------|-------------|----------------|
| O17  | 27.5 (18)   | 8951.9 (15)  | 3038.8 (14) | 25.9 (3)       |
| O22  | 7534.0 (18) | 8971.2 (16)  | 9967.7 (15) | 27.3 (3)       |
| O24  | 5817.1 (18) | 10033.0 (15) | 8687.5 (14) | 25.2 (3)       |
| O25  | 832.5 (19)  | 5111.3 (15)  | 8073.3 (15) | 27.9 (4)       |

**Table S3 Anisotropic Displacement Parameters ( $\text{\AA}^2 \times 10^3$ ) for 220428lt\_auto. The Anisotropic displacement factor exponent takes the form:  $-2\pi^2[\text{h}^2\text{a}^*{}^2U_{11}+2\text{hka}^*\text{b}^*U_{12}+\dots]$ .**

| Atom | $U_{11}$   | $U_{22}$   | $U_{33}$   | $U_{23}$  | $U_{13}$  | $U_{12}$   |
|------|------------|------------|------------|-----------|-----------|------------|
| Br27 | 50.57 (18) | 20.91 (13) | 27.73 (14) | -0.68 (9) | 3.49 (11) | 12.45 (10) |
| C1   | 19.9 (10)  | 19.8 (10)  | 13.0 (9)   | 1.4 (7)   | 0.4 (8)   | 3.5 (8)    |
| C2   | 23.4 (11)  | 20.6 (10)  | 14.3 (9)   | 0.4 (8)   | 0.2 (8)   | 1.8 (8)    |
| C3   | 33.6 (12)  | 21.6 (11)  | 15.7 (10)  | 1.1 (8)   | 0.7 (9)   | 7.7 (9)    |
| C4   | 31.0 (12)  | 32.2 (12)  | 23.4 (11)  | 1.8 (9)   | 8.0 (9)   | 13.9 (10)  |
| C5   | 24.8 (11)  | 34.8 (13)  | 23.6 (11)  | 4.3 (9)   | 9.0 (9)   | 4.4 (9)    |
| C6   | 22.8 (11)  | 20.4 (10)  | 19.7 (10)  | 2.4 (8)   | 3.9 (8)   | 1.4 (8)    |
| C7   | 18.6 (10)  | 15.2 (9)   | 16.5 (10)  | -1.0 (8)  | 2.4 (8)   | -0.4 (8)   |
| C8   | 18.8 (10)  | 20.8 (10)  | 20.5 (10)  | 0.2 (8)   | 4.5 (8)   | 2.2 (8)    |
| C9   | 20.2 (10)  | 20.7 (10)  | 19.8 (10)  | 0.3 (8)   | 3.5 (8)   | -0.7 (8)   |
| C10  | 18.0 (10)  | 18.1 (10)  | 16.4 (10)  | -1.1 (8)  | 3.0 (8)   | 1.3 (8)    |
| C11  | 16.9 (10)  | 21.6 (10)  | 16.6 (10)  | -0.5 (8)  | 2.9 (8)   | 3.5 (8)    |
| C12  | 18.5 (10)  | 18.4 (10)  | 22.2 (10)  | -2.4 (8)  | 2.2 (8)   | 1.2 (8)    |
| C13  | 20.4 (10)  | 24.2 (11)  | 21.7 (11)  | -4.3 (9)  | -1.1 (8)  | 0.3 (8)    |
| C14  | 17.9 (10)  | 27.1 (11)  | 16.8 (10)  | 0.7 (8)   | 2.0 (8)   | 7.0 (8)    |

**Table S3 Anisotropic Displacement Parameters ( $\text{\AA}^2 \times 10^3$ ) for 220428lt\_auto. The Anisotropic displacement factor exponent takes the form:  $-2\pi^2[h^2a^{*2}U_{11}+2hka^*b^*U_{12}+\dots]$ .**

| Atom | U <sub>11</sub> | U <sub>22</sub> | U <sub>33</sub> | U <sub>23</sub> | U <sub>13</sub> | U <sub>12</sub> |
|------|-----------------|-----------------|-----------------|-----------------|-----------------|-----------------|
| C15  | 20.1 (10)       | 19.9 (10)       | 21.5 (10)       | 2.1 (8)         | 2.2 (8)         | 0.9 (8)         |
| C16  | 18.6 (10)       | 20.5 (10)       | 19.9 (10)       | 0.5 (8)         | 1.1 (8)         | 0.1 (8)         |
| C18  | 26.5 (12)       | 35.2 (13)       | 23.4 (11)       | 9.1 (9)         | 3.9 (9)         | 5.2 (10)        |
| C20  | 24.2 (11)       | 25.1 (11)       | 21.0 (11)       | 5.8 (9)         | -0.5 (9)        | 2.2 (9)         |
| C21  | 30.7 (14)       | 40.6 (16)       | 59.9 (19)       | 21.6 (14)       | -16.1 (13)      | -3.5 (11)       |
| C23  | 20.0 (10)       | 23.6 (11)       | 17.8 (10)       | -1.6 (8)        | 3.3 (8)         | -0.7 (8)        |
| C26  | 26.0 (12)       | 32.9 (13)       | 25.8 (12)       | -1.0 (10)       | 7.2 (9)         | -2.0 (9)        |
| N19  | 17.6 (9)        | 17.2 (8)        | 18.6 (8)        | 1.9 (7)         | -0.5 (7)        | -0.3 (7)        |
| O17  | 26.1 (8)        | 29.6 (8)        | 20.4 (8)        | 4.1 (6)         | -2.9 (6)        | 4.0 (6)         |
| O22  | 19.9 (8)        | 29.9 (8)        | 28.8 (8)        | 4.6 (7)         | -2.4 (6)        | -4.2 (6)        |
| O24  | 25.9 (8)        | 21.4 (8)        | 27.8 (8)        | 4.8 (6)         | 4.5 (6)         | -1.8 (6)        |
| O25  | 27.8 (8)        | 25.5 (8)        | 28.4 (9)        | -1.8 (6)        | 6.9 (7)         | -8.5 (7)        |

**Table S4 Bond Lengths for 220428lt\_auto.**

| Atom Atom | Length/ $\text{\AA}$ | Atom Atom | Length/ $\text{\AA}$ |
|-----------|----------------------|-----------|----------------------|
| Br27 C3   | 1.896 (2)            | C10 N19   | 1.437 (3)            |
| C1 C2     | 1.392 (3)            | C11 C12   | 1.400 (3)            |
| C1 C6     | 1.402 (3)            | C11 C16   | 1.387 (3)            |
| C1 C7     | 1.517 (3)            | C12 C13   | 1.383 (3)            |
| C2 C3     | 1.391 (3)            | C13 C14   | 1.395 (3)            |
| C3 C4     | 1.379 (3)            | C14 C15   | 1.393 (3)            |
| C4 C5     | 1.387 (3)            | C14 O17   | 1.365 (2)            |
| C5 C6     | 1.385 (3)            | C15 C16   | 1.393 (3)            |

**Table S4 Bond Lengths for 220428lt\_auto.**

| Atom | Atom | Length/Å  | Atom | Atom | Length/Å  |
|------|------|-----------|------|------|-----------|
| C7   | C8   | 1.552 (3) | C18  | O17  | 1.430 (3) |
| C7   | C10  | 1.597 (3) | C20  | C21  | 1.513 (3) |
| C7   | C11  | 1.521 (3) | C20  | N19  | 1.452 (3) |
| C8   | C9   | 1.488 (3) | C21  | O22  | 1.441 (3) |
| C8   | O25  | 1.212 (3) | C23  | N19  | 1.352 (3) |
| C9   | C10  | 1.525 (3) | C23  | O22  | 1.357 (3) |
| C9   | C26  | 1.324 (3) | C23  | O24  | 1.210 (3) |

**Table S5 Bond Angles for 220428lt\_auto.**

| Atom | Atom | Atom | Angle/°     | Atom | Atom | Atom | Angle/°     |
|------|------|------|-------------|------|------|------|-------------|
| C2   | C1   | C6   | 119.04 (19) | N19  | C10  | C7   | 117.68 (16) |
| C2   | C1   | C7   | 121.51 (18) | N19  | C10  | C9   | 115.74 (17) |
| C6   | C1   | C7   | 119.42 (18) | C12  | C11  | C7   | 119.38 (18) |
| C3   | C2   | C1   | 119.48 (19) | C16  | C11  | C7   | 122.14 (18) |
| C2   | C3   | Br27 | 118.56 (17) | C16  | C11  | C12  | 118.30 (19) |
| C4   | C3   | Br27 | 119.60 (17) | C13  | C12  | C11  | 120.8 (2)   |
| C4   | C3   | C2   | 121.8 (2)   | C12  | C13  | C14  | 120.27 (19) |
| C3   | C4   | C5   | 118.4 (2)   | C15  | C14  | C13  | 119.55 (19) |
| C6   | C5   | C4   | 121.0 (2)   | O17  | C14  | C13  | 115.49 (19) |
| C5   | C6   | C1   | 120.2 (2)   | O17  | C14  | C15  | 124.96 (19) |
| C1   | C7   | C8   | 115.15 (17) | C16  | C15  | C14  | 119.47 (19) |
| C1   | C7   | C10  | 115.56 (16) | C11  | C16  | C15  | 121.52 (19) |
| C1   | C7   | C11  | 109.59 (16) | N19  | C20  | C21  | 101.32 (17) |

**Table S5 Bond Angles for 220428lt\_auto.**

| Atom | Atom | Atom | Angle/°     | Atom | Atom | Atom | Angle/°     |
|------|------|------|-------------|------|------|------|-------------|
| C8   | C7   | C10  | 86.56 (14)  | O22  | C21  | C20  | 106.98 (19) |
| C11  | C7   | C8   | 113.90 (17) | N19  | C23  | O22  | 110.03 (18) |
| C11  | C7   | C10  | 114.65 (16) | O24  | C23  | N19  | 127.4 (2)   |
| C9   | C8   | C7   | 92.52 (16)  | O24  | C23  | O22  | 122.54 (19) |
| O25  | C8   | C7   | 133.47 (19) | C10  | N19  | C20  | 125.99 (16) |
| O25  | C8   | C9   | 134.0 (2)   | C23  | N19  | C10  | 121.33 (17) |
| C8   | C9   | C10  | 91.53 (16)  | C23  | N19  | C20  | 112.56 (17) |
| C26  | C9   | C8   | 133.3 (2)   | C14  | O17  | C18  | 117.37 (17) |
| C26  | C9   | C10  | 135.2 (2)   | C23  | O22  | C21  | 109.10 (17) |
| C9   | C10  | C7   | 89.39 (15)  |      |      |      |             |

**Table S6 Torsion Angles for 220428lt\_auto.**

| A    | B  | C   | D    | Angle/°     | A   | B   | C   | D   | Angle/°      |
|------|----|-----|------|-------------|-----|-----|-----|-----|--------------|
| Br27 | C3 | C4  | C5   | 178.32 (17) | C9  | C10 | N19 | C20 | 27.4 (3)     |
| C1   | C2 | C3  | Br27 | 179.20 (15) | C9  | C10 | N19 | C23 | -148.34 (19) |
| C1   | C2 | C3  | C4   | 0.9 (3)     | C10 | C7  | C8  | C9  | -0.17 (16)   |
| C1   | C7 | C8  | C9   | 116.52 (18) | C10 | C7  | C8  | O25 | -179.7 (3)   |
| C1   | C7 | C8  | O25  | -63.0 (3)   | C10 | C7  | C11 | C12 | -144.38 (18) |
| C1   | C7 | C10 | C9   | 116.14 (18) | C10 | C7  | C11 | C16 | 40.5 (3)     |
| C1   | C7 | C10 | N19  | 2.9 (3)     | C11 | C7  | C8  | C9  | -115.66 (18) |
| C1   | C7 | C11 | C12  | 83.8 (2)    | C11 | C7  | C8  | O25 | 64.8 (3)     |
| C1   | C7 | C11 | C16  | -91.3 (2)   | C11 | C7  | C10 | C9  | 114.93 (18)  |

**Table S6 Torsion Angles for 220428lt\_auto.**

| <b>A</b> | <b>B</b> | <b>C</b> | <b>D</b> | <b>Angle/°</b> | <b>A</b> | <b>B</b> | <b>C</b> | <b>D</b> | <b>Angle/°</b> |
|----------|----------|----------|----------|----------------|----------|----------|----------|----------|----------------|
| C2       | C1       | C6       | C5       | -2.0 (3)       | C11      | C7       | C10      | N19      | -126.06 (19)   |
| C2       | C1       | C7       | C8       | 24.0 (3)       | C11      | C12      | C13      | C14      | 0.6 (3)        |
| C2       | C1       | C7       | C10      | 122.6 (2)      | C12      | C11      | C16      | C15      | -1.4 (3)       |
| C2       | C1       | C7       | C11      | -106.0 (2)     | C12      | C13      | C14      | C15      | -2.4 (3)       |
| C2       | C3       | C4       | C5       | -1.7 (3)       | C12      | C13      | C14      | O17      | 178.14 (19)    |
| C3       | C4       | C5       | C6       | 0.8 (3)        | C13      | C14      | C15      | C16      | 2.2 (3)        |
| C4       | C5       | C6       | C1       | 1.1 (3)        | C13      | C14      | O17      | C18      | -174.00 (19)   |
| C6       | C1       | C2       | C3       | 1.0 (3)        | C14      | C15      | C16      | C11      | -0.4 (3)       |
| C6       | C1       | C7       | C8       | 157.89 (18)    | C15      | C14      | O17      | C18      | 6.5 (3)        |
| C6       | C1       | C7       | C10      | -59.2 (2)      | C16      | C11      | C12      | C13      | 1.2 (3)        |
| C6       | C1       | C7       | C11      | 72.2 (2)       | C20      | C21      | O22      | C23      | -1.2 (3)       |
| C7       | C1       | C2       | C3       | 179.16 (18)    | C21      | C20      | N19      | C10      | -176.8 (2)     |
| C7       | C1       | C6       | C5       | 179.83 (19)    | C21      | C20      | N19      | C23      | -0.7 (3)       |
| C7       | C8       | C9       | C10      | 0.18 (16)      | C26      | C9       | C10      | C7       | 179.0 (3)      |
| C7       | C8       | C9       | C26      | -179.0 (3)     | C26      | C9       | C10      | N19      | 58.3 (3)       |
| C7       | C10      | N19      | C20      | -76.5 (3)      | N19      | C20      | C21      | O22      | 1.1 (3)        |
| C7       | C10      | N19      | C23      | 107.8 (2)      | N19      | C23      | O22      | C21      | 0.7 (3)        |
| C7       | C11      | C12      | C13      | 174.04 (19)    | O17      | C14      | C15      | C16      | -178.33 (19)   |
| C7       | C11      | C16      | C15      | 173.77 (19)    | O22      | C23      | N19      | C10      | 176.29 (17)    |
| C8       | C7       | C10      | C9       | 0.17 (15)      | O22      | C23      | N19      | C20      | 0.0 (2)        |
| C8       | C7       | C10      | N19      | 119.17 (18)    | O24      | C23      | N19      | C10      | -4.6 (3)       |
| C8       | C7       | C11      | C12      | -46.8 (2)      | O24      | C23      | N19      | C20      | 179.1 (2)      |
| C8       | C7       | C11      | C16      | 138.1 (2)      | O24      | C23      | O22      | C21      | -178.4 (2)     |

**Table S6 Torsion Angles for 220428lt\_auto.**

| A  | B  | C   | D   | Angle/°    | A   | B  | C  | D   | Angle/°  |
|----|----|-----|-----|------------|-----|----|----|-----|----------|
| C8 | C9 | C10 | C7  | -0.17(16)  | O25 | C8 | C9 | C10 | 179.7(3) |
| C8 | C9 | C10 | N19 | 120.88(18) | O25 | C8 | C9 | C26 | 0.5(5)   |

**Table S7 Hydrogen Atom Coordinates ( $\text{\AA}\times 10^4$ ) and Isotropic Displacement Parameters ( $\text{\AA}^2\times 10^3$ ) for 220428lt\_auto.**

| Atom | x       | y        | z        | U(eq) |
|------|---------|----------|----------|-------|
| H2   | 3095.73 | 4266.89  | 7212.59  | 24    |
| H4   | 7463.84 | 4337.11  | 6165.24  | 33    |
| H5   | 7755.96 | 6651.34  | 6324.66  | 32    |
| H6   | 5744.34 | 7776.05  | 6914.46  | 25    |
| H10  | 3105.59 | 8740.9   | 8626.77  | 21    |
| H12  | 505.17  | 5912.9   | 5797.08  | 24    |
| H13  | -639.73 | 6777.19  | 3945.76  | 27    |
| H15  | 2292.74 | 10202.79 | 4790.97  | 25    |
| H16  | 3424.82 | 9323.31  | 6651.37  | 24    |
| H18A | 74.45   | 10337.26 | 1779.41  | 42    |
| H18B | 1782.23 | 10177.06 | 2554.04  | 42    |
| H18C | 534.39  | 10904.09 | 3211.57  | 42    |
| H20A | 5839.51 | 6159.74  | 9661.19  | 29    |
| H20B | 5292.27 | 6824.31  | 10888.04 | 29    |
| H21A | 7746.65 | 7820.78  | 11460.44 | 56    |
| H21B | 8281.68 | 7183.87  | 10223.84 | 56    |
| H26A | 1103.51 | 6366.27  | 10807.92 | 34    |

**Table S7 Hydrogen Atom Coordinates ( $\text{\AA} \times 10^4$ ) and Isotropic Displacement Parameters ( $\text{\AA}^2 \times 10^3$ ) for 220428lt\_auto.**

| Atom | x       | y       | z        | U(eq) |
|------|---------|---------|----------|-------|
| H26B | 2354.81 | 7712.58 | 11199.19 | 34    |

### Experimental

Single crystals of  $\text{C}_{21}\text{H}_{18}\text{BrNO}_4$  [220428lt\_auto] were [ ]. A suitable crystal was selected and [ ] on a **XtaLAB Synergy R, DW system, HyPix-Arc 150** diffractometer. The crystal was kept at 100.00(10) K during data collection. Using Olex2 [1], the structure was solved with the SHELXT [2] structure solution program using Intrinsic Phasing and refined with the SHELXL [3] refinement package using Least Squares minimisation.

1. Dolomanov, O.V., Bourhis, L.J., Gildea, R.J, Howard, J.A.K. & Puschmann, H. (2009), *J. Appl. Cryst.* 42, 339-341.
2. Sheldrick, G.M. (2015). *Acta Cryst.* A71, 3-8.
3. Sheldrick, G.M. (2015). *Acta Cryst.* C71, 3-8.

### Crystal structure determination of [220428lt\_auto]

**Crystal Data** for  $\text{C}_{21}\text{H}_{18}\text{BrNO}_4$  ( $M = 428.27$  g/mol): triclinic, space group P-1 (no. 2),  $a = 8.5723(2)$   $\text{\AA}$ ,  $b = 10.1918(3)$   $\text{\AA}$ ,  $c = 10.7219(3)$   $\text{\AA}$ ,  $\alpha = 91.770(2)^\circ$ ,  $\beta = 98.537(2)^\circ$ ,  $\gamma = 96.489(2)^\circ$ ,  $V = 919.34(4)$   $\text{\AA}^3$ ,  $Z = 2$ ,  $T = 100.00(10)$  K,  $\mu(\text{Cu K}\alpha) = 3.282$   $\text{mm}^{-1}$ ,  $D_{\text{calc}} = 1.547$   $\text{g/cm}^3$ , 10098 reflections measured ( $8.348^\circ \leq 2\theta \leq 149.922^\circ$ ), 3579 unique ( $R_{\text{int}} = 0.0236$ ,  $R_{\text{sigma}} = 0.0280$ ) which were used in all calculations. The final  $R_1$  was 0.0296 ( $I > 2\sigma(I)$ ) and  $wR_2$  was 0.0743 (all data).

### Refinement model description

Number of restraints - 0, number of constraints - unknown.

Details:

1. Fixed Uiso  
At 1.2 times of:  
All C(H) groups, All C(H,H) groups  
At 1.5 times of:  
All C(H,H,H) groups
- 2.a Ternary CH refined with riding coordinates:  
C10 (H10)
- 2.b Secondary CH2 refined with riding coordinates:  
C20 (H20A,H20B), C21 (H21A,H21B)
- 2.c Aromatic/amide H refined with riding coordinates:  
C2 (H2), C4 (H4), C5 (H5), C6 (H6), C12 (H12), C13 (H13), C15 (H15), C16 (H16)
- 2.d X=CH2 refined with riding coordinates:  
C26 (H26A,H26B)
- 2.e Idealised Me refined as rotating group:  
C18 (H18A,H18B,H18C)

### (b) X-ray crystallographic data of compound (3l):



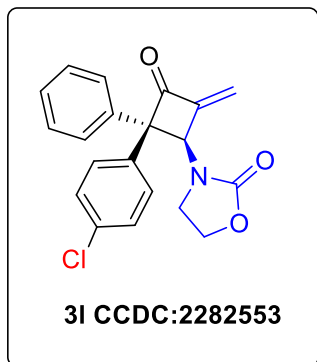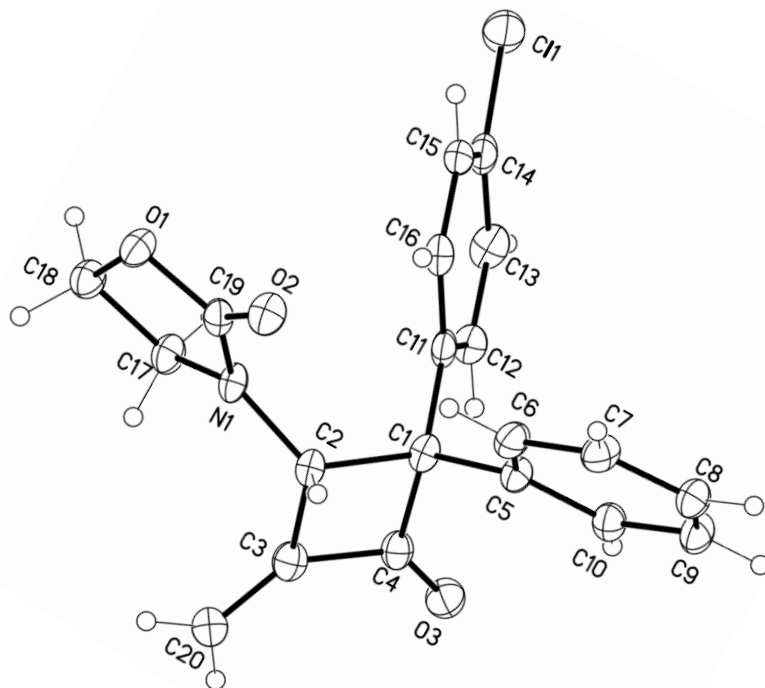

Ellipsoid contour % probability level = 50%

**Experimental:** The sample was dissolved in appropriate amount of Dichloromethane followed by the addition of pentane to furnish a saturated solution. Afterwards, the mixture was allowed to stand at room temperature to form the crystals.

## 230734lt\_auto

**Table S8 Crystal data and structure refinement for 230734lt\_auto.**

|                     |                                                   |
|---------------------|---------------------------------------------------|
| Identification code | 230734lt_auto                                     |
| Empirical formula   | C <sub>20</sub> H <sub>16</sub> ClNO <sub>3</sub> |

|                                             |                                                                |
|---------------------------------------------|----------------------------------------------------------------|
| Formula weight                              | 353.79                                                         |
| Temperature/K                               | 99.98(10)                                                      |
| Crystal system                              | monoclinic                                                     |
| Space group                                 | Pc                                                             |
| a/Å                                         | 9.0167(3)                                                      |
| b/Å                                         | 11.7335(4)                                                     |
| c/Å                                         | 8.0325(2)                                                      |
| $\alpha$ /°                                 | 90                                                             |
| $\beta$ /°                                  | 104.733(3)                                                     |
| $\gamma$ /°                                 | 90                                                             |
| Volume/Å <sup>3</sup>                       | 821.88(4)                                                      |
| Z                                           | 2                                                              |
| $\rho_{\text{calc}}/\text{cm}^3$            | 1.430                                                          |
| $\mu/\text{mm}^{-1}$                        | 2.223                                                          |
| F(000)                                      | 368.0                                                          |
| Crystal size/mm <sup>3</sup>                | 0.12 × 0.09 × 0.04                                             |
| Radiation                                   | Cu K $\alpha$ ( $\lambda$ = 1.54184)                           |
| 2 $\Theta$ range for data collection/°      | 7.534 to 133.126                                               |
| Index ranges                                | -10 ≤ h ≤ 10, -13 ≤ k ≤ 13, -9 ≤ l ≤ 5                         |
| Reflections collected                       | 5108                                                           |
| Independent reflections                     | 2012 [ $R_{\text{int}}$ = 0.0316, $R_{\text{sigma}}$ = 0.0357] |
| Data/restraints/parameters                  | 2012/2/227                                                     |
| Goodness-of-fit on F <sup>2</sup>           | 1.094                                                          |
| Final R indexes [ $I \geq 2\sigma(I)$ ]     | $R_1$ = 0.0408, $wR_2$ = 0.1030                                |
| Final R indexes [all data]                  | $R_1$ = 0.0422, $wR_2$ = 0.1038                                |
| Largest diff. peak/hole / e Å <sup>-3</sup> | 0.36/-0.44                                                     |

Flack parameter 0.03(3)

**Table S9 Fractional Atomic Coordinates ( $\times 10^4$ ) and Equivalent Isotropic Displacement Parameters ( $\text{\AA}^2 \times 10^3$ ) for 230734lt\_auto.  $U_{\text{eq}}$  is defined as 1/3 of the trace of the orthogonalised  $U_{\text{IJ}}$  tensor.**

| Atom | <i>x</i>     | <i>y</i>    | <i>z</i>     | $U(\text{eq})$ |
|------|--------------|-------------|--------------|----------------|
| C1   | 403 (4)      | -2693 (3)   | 3861 (5)     | 19.7 (8)       |
| C2   | 15 (4)       | -1859 (3)   | 5252 (5)     | 19.3 (8)       |
| C3   | 597 (5)      | -2752 (3)   | 6638 (5)     | 21.8 (8)       |
| C4   | 994 (4)      | -3544 (4)   | 5368 (5)     | 20.2 (8)       |
| C5   | 1675 (4)     | -2254 (4)   | 3070 (5)     | 21.4 (9)       |
| C6   | 1750 (4)     | -1112 (4)   | 2646 (5)     | 23.4 (9)       |
| C7   | 2850 (5)     | -747 (4)    | 1798 (6)     | 23.9 (9)       |
| C8   | 3842 (4)     | -1536 (4)   | 1359 (5)     | 26.4 (10)      |
| C9   | 3769 (5)     | -2668 (4)   | 1794 (5)     | 26.4 (9)       |
| C10  | 2693 (4)     | -3043 (4)   | 2656 (5)     | 21.9 (8)       |
| C11  | -953 (4)     | -3091 (4)   | 2429 (5)     | 19.4 (8)       |
| C12  | -1337 (5)    | -4239 (4)   | 2160 (5)     | 22.3 (9)       |
| C13  | -2568 (4)    | -4562 (4)   | 803 (5)      | 26.7 (10)      |
| C14  | -3401 (4)    | -3732 (4)   | -275 (5)     | 23.5 (9)       |
| C15  | -3018 (4)    | -2599 (4)   | -33 (5)      | 21.3 (8)       |
| C16  | -1795 (4)    | -2285 (3)   | 1322 (5)     | 19.8 (8)       |
| C17  | -2778 (4)    | -2128 (3)   | 5486 (5)     | 22.0 (8)       |
| C18  | -3963 (5)    | -1180 (3)   | 5429 (5)     | 22.8 (9)       |
| C19  | -2017 (4)    | -465 (3)    | 4396 (5)     | 19.9 (8)       |
| C20  | 705 (5)      | -2837 (4)   | 8311 (5)     | 25.2 (9)       |
| Cl1  | -4970.8 (11) | -4127.1 (9) | -1928.7 (12) | 31.4 (3)       |

**Table S9 Fractional Atomic Coordinates ( $\times 10^4$ ) and Equivalent Isotropic Displacement Parameters ( $\text{\AA}^2 \times 10^3$ ) for 230734lt\_auto.  $U_{\text{eq}}$  is defined as 1/3 of the trace of the orthogonalised  $U_{\text{IJ}}$  tensor.**

| Atom | $x$       | $y$       | $z$      | $U(\text{eq})$ |
|------|-----------|-----------|----------|----------------|
| N1   | -1543 (4) | -1472 (3) | 5069 (4) | 19.8 (7)       |
| O1   | -3496 (3) | -268 (3)  | 4452 (3) | 23.4 (6)       |
| O2   | -1301 (3) | 244 (2)   | 3775 (4) | 25.8 (6)       |
| O3   | 1563 (3)  | -4483 (3) | 5461 (4) | 26.8 (7)       |

**Table S10 Anisotropic Displacement Parameters ( $\text{\AA}^2 \times 10^3$ ) for 230734lt\_auto. The Anisotropic displacement factor exponent takes the form:  $-2\pi^2[\text{h}^2\text{a}^{*2}U_{11}+2\text{hka}^*\text{b}^*U_{12}+\dots]$ .**

| Atom | $U_{11}$  | $U_{22}$ | $U_{33}$  | $U_{23}$  | $U_{13}$  | $U_{12}$  |
|------|-----------|----------|-----------|-----------|-----------|-----------|
| C1   | 18.1 (19) | 18 (2)   | 25 (2)    | -1.0 (16) | 9.6 (16)  | 0.1 (16)  |
| C2   | 18.7 (18) | 20 (2)   | 21.6 (18) | -1.0 (16) | 9.5 (15)  | 1.0 (16)  |
| C3   | 21.3 (19) | 20 (2)   | 25 (2)    | -1.0 (17) | 8.7 (16)  | -2.4 (16) |
| C4   | 20.3 (19) | 20 (2)   | 22.6 (19) | -1.3 (17) | 9.3 (15)  | -2.4 (16) |
| C5   | 16.5 (19) | 27 (2)   | 22 (2)    | -1.1 (17) | 7.3 (16)  | 0.3 (16)  |
| C6   | 17.3 (19) | 28 (2)   | 26 (2)    | 1.7 (17)  | 7.4 (16)  | 0.7 (16)  |
| C7   | 19 (2)    | 25 (2)   | 28 (2)    | 4.1 (18)  | 7.5 (17)  | -2.4 (16) |
| C8   | 18 (2)    | 37 (3)   | 26 (2)    | -0.2 (19) | 9.8 (16)  | -1.5 (19) |
| C9   | 19.9 (19) | 33 (2)   | 29 (2)    | -2.2 (19) | 10.9 (16) | -0.8 (18) |
| C10  | 21.0 (19) | 23 (2)   | 23 (2)    | -2.2 (16) | 7.9 (16)  | -1.6 (16) |
| C11  | 17.7 (19) | 24 (2)   | 20.3 (18) | -3.0 (16) | 11.2 (15) | 0.8 (16)  |
| C12  | 22 (2)    | 22 (2)   | 25 (2)    | -1.4 (18) | 8.7 (17)  | -0.5 (17) |
| C13  | 24 (2)    | 22 (2)   | 36 (2)    | -5.4 (19) | 10.3 (18) | -3.0 (16) |
| C14  | 21 (2)    | 29 (2)   | 23 (2)    | -4.4 (17) | 11.8 (17) | 0.7 (17)  |
| C15  | 17.2 (18) | 30 (2)   | 18.4 (18) | -2.3 (17) | 6.8 (15)  | 1.4 (16)  |

**Table S10 Anisotropic Displacement Parameters ( $\text{\AA}^2 \times 10^3$ ) for 230734lt\_auto. The Anisotropic displacement factor exponent takes the form:  $-2\pi^2[h^2a^{*2}U_{11}+2hka^*b^*U_{12}+\dots]$ .**

| Atom | U <sub>11</sub> | U <sub>22</sub> | U <sub>33</sub> | U <sub>23</sub> | U <sub>13</sub> | U <sub>12</sub> |
|------|-----------------|-----------------|-----------------|-----------------|-----------------|-----------------|
| C16  | 22.6 (19)       | 18 (2)          | 22.6 (18)       | -2.8 (16)       | 12.3 (15)       | -1.9 (15)       |
| C17  | 20.3 (19)       | 22 (2)          | 27 (2)          | 1.7 (17)        | 10.9 (16)       | -0.5 (17)       |
| C18  | 22 (2)          | 22 (2)          | 25 (2)          | 2.7 (17)        | 9.0 (16)        | 1.4 (16)        |
| C19  | 20.6 (19)       | 21 (2)          | 19.8 (19)       | -3.2 (16)       | 8.5 (15)        | 0.0 (16)        |
| C20  | 25 (2)          | 29 (2)          | 23 (2)          | -1.3 (18)       | 7.5 (16)        | 1.3 (18)        |
| Cl1  | 23.9 (5)        | 36.9 (6)        | 32.3 (5)        | -9.3 (5)        | 5.4 (4)         | -5.2 (4)        |
| N1   | 18.6 (16)       | 20.2 (17)       | 24.1 (17)       | -0.3 (14)       | 12.0 (13)       | -0.5 (14)       |
| O1   | 18.5 (14)       | 24.6 (16)       | 28.9 (15)       | 3.1 (13)        | 9.2 (11)        | 2.4 (12)        |
| O2   | 26.4 (15)       | 22.3 (15)       | 30.7 (16)       | 1.2 (13)        | 11.1 (12)       | 0.7 (13)        |
| O3   | 30.5 (16)       | 23.6 (16)       | 26.7 (16)       | 2.6 (12)        | 8.1 (12)        | 6.1 (13)        |

**Table S11 Bond Lengths for 230734lt\_auto.**

| Atom Atom | Length/ $\text{\AA}$ | Atom Atom | Length/ $\text{\AA}$ |
|-----------|----------------------|-----------|----------------------|
| C1 C2     | 1.590 (5)            | C9 C10    | 1.398 (5)            |
| C1 C4     | 1.555 (6)            | C11 C12   | 1.393 (6)            |
| C1 C5     | 1.535 (5)            | C11 C16   | 1.385 (6)            |
| C1 C11    | 1.523 (5)            | C12 C13   | 1.396 (6)            |
| C2 C3     | 1.521 (6)            | C13 C14   | 1.390 (6)            |
| C2 N1     | 1.447 (5)            | C14 C15   | 1.374 (6)            |
| C3 C4     | 1.490 (6)            | C14 Cl1   | 1.740 (4)            |
| C3 C20    | 1.326 (6)            | C15 C16   | 1.387 (6)            |
| C4 O3     | 1.209 (5)            | C17 C18   | 1.534 (5)            |
| C5 C6     | 1.389 (6)            | C17 N1    | 1.461 (5)            |

**Table S11 Bond Lengths for 230734lt\_auto.**

| Atom | Atom | Length/Å  | Atom | Atom | Length/Å  |
|------|------|-----------|------|------|-----------|
| C5   | C10  | 1.402 (6) | C18  | O1   | 1.451 (5) |
| C6   | C7   | 1.405 (6) | C19  | N1   | 1.325 (5) |
| C7   | C8   | 1.394 (6) | C19  | O1   | 1.366 (4) |
| C8   | C9   | 1.379 (6) | C19  | O2   | 1.234 (5) |

**Table S12 Bond Angles for 230734lt\_auto.**

| Atom | Atom | Atom | Angle/°   | Atom | Atom | Atom | Angle/°   |
|------|------|------|-----------|------|------|------|-----------|
| C4   | C1   | C2   | 86.6 (3)  | C8   | C9   | C10  | 120.8 (4) |
| C5   | C1   | C2   | 113.9 (3) | C9   | C10  | C5   | 119.2 (4) |
| C5   | C1   | C4   | 113.2 (3) | C12  | C11  | C1   | 122.3 (4) |
| C11  | C1   | C2   | 116.2 (3) | C16  | C11  | C1   | 118.6 (4) |
| C11  | C1   | C4   | 116.2 (3) | C16  | C11  | C12  | 119.1 (4) |
| C11  | C1   | C5   | 109.3 (3) | C11  | C12  | C13  | 120.1 (4) |
| C3   | C2   | C1   | 89.6 (3)  | C14  | C13  | C12  | 119.5 (4) |
| N1   | C2   | C1   | 120.2 (3) | C13  | C14  | C11  | 119.6 (3) |
| N1   | C2   | C3   | 115.8 (3) | C15  | C14  | C13  | 120.9 (4) |
| C4   | C3   | C2   | 91.6 (3)  | C15  | C14  | C11  | 119.5 (3) |
| C20  | C3   | C2   | 135.7 (4) | C14  | C15  | C16  | 119.2 (4) |
| C20  | C3   | C4   | 132.7 (4) | C11  | C16  | C15  | 121.3 (4) |
| C3   | C4   | C1   | 92.2 (3)  | N1   | C17  | C18  | 100.2 (3) |
| O3   | C4   | C1   | 133.6 (4) | O1   | C18  | C17  | 104.8 (3) |
| O3   | C4   | C3   | 134.3 (4) | N1   | C19  | O1   | 110.8 (3) |
| C6   | C5   | C1   | 120.9 (3) | O2   | C19  | N1   | 128.2 (3) |

**Table S12 Bond Angles for 230734lt\_auto.**

| Atom | Atom | Atom | Angle/°   | Atom | Atom | Atom | Angle/°   |
|------|------|------|-----------|------|------|------|-----------|
| C6   | C5   | C10  | 120.2 (4) | O2   | C19  | O1   | 121.0 (4) |
| C10  | C5   | C1   | 118.7 (4) | C2   | N1   | C17  | 126.1 (3) |
| C5   | C6   | C7   | 119.8 (4) | C19  | N1   | C2   | 121.7 (3) |
| C8   | C7   | C6   | 119.9 (4) | C19  | N1   | C17  | 112.2 (3) |
| C9   | C8   | C7   | 120.0 (4) | C19  | O1   | C18  | 108.2 (3) |

**Table S13 Torsion Angles for 230734lt\_auto.**

| A  | B   | C   | D   | Angle/°    | A   | B   | C   | D   | Angle/°    |
|----|-----|-----|-----|------------|-----|-----|-----|-----|------------|
| C1 | C2  | C3  | C4  | 0.8 (3)    | C6  | C7  | C8  | C9  | -1.6 (6)   |
| C1 | C2  | C3  | C20 | -178.2 (5) | C7  | C8  | C9  | C10 | 0.9 (6)    |
| C1 | C2  | N1  | C17 | 78.3 (5)   | C8  | C9  | C10 | C5  | 0.3 (6)    |
| C1 | C2  | N1  | C19 | -98.1 (4)  | C10 | C5  | C6  | C7  | 0.0 (6)    |
| C1 | C5  | C6  | C7  | -174.9 (4) | C11 | C1  | C2  | C3  | 116.8 (3)  |
| C1 | C5  | C10 | C9  | 174.3 (4)  | C11 | C1  | C2  | N1  | -3.2 (5)   |
| C1 | C11 | C12 | C13 | -178.4 (3) | C11 | C1  | C4  | C3  | -116.9 (3) |
| C1 | C11 | C16 | C15 | 178.4 (3)  | C11 | C1  | C4  | O3  | 63.5 (6)   |
| C2 | C1  | C4  | C3  | 0.8 (3)    | C11 | C1  | C5  | C6  | 91.4 (4)   |
| C2 | C1  | C4  | O3  | -178.8 (5) | C11 | C1  | C5  | C10 | -83.6 (4)  |
| C2 | C1  | C5  | C6  | -40.5 (5)  | C11 | C12 | C13 | C14 | 0.1 (6)    |
| C2 | C1  | C5  | C10 | 144.5 (4)  | C12 | C11 | C16 | C15 | 0.7 (6)    |
| C2 | C1  | C11 | C12 | -119.8 (4) | C12 | C13 | C14 | C15 | 0.7 (6)    |
| C2 | C1  | C11 | C16 | 62.5 (5)   | C12 | C13 | C14 | C11 | -178.1 (3) |
| C2 | C3  | C4  | C1  | -0.8 (3)   | C13 | C14 | C15 | C16 | -0.9 (6)   |

**Table S13 Torsion Angles for 230734lt\_auto.**

| A  | B  | C   | D   | Angle/°   | A   | B   | C   | D   | Angle/°   |
|----|----|-----|-----|-----------|-----|-----|-----|-----|-----------|
| C2 | C3 | C4  | O3  | 178.8(5)  | C14 | C15 | C16 | C11 | 0.2(6)    |
| C3 | C2 | N1  | C17 | -27.6(5)  | C16 | C11 | C12 | C13 | -0.8(6)   |
| C3 | C2 | N1  | C19 | 156.0(4)  | C17 | C18 | O1  | C19 | -16.6(4)  |
| C4 | C1 | C2  | C3  | -0.8(3)   | C18 | C17 | N1  | C2  | 167.2(3)  |
| C4 | C1 | C2  | N1  | -120.8(4) | C18 | C17 | N1  | C19 | -16.1(4)  |
| C4 | C1 | C5  | C6  | -137.4(4) | C20 | C3  | C4  | C1  | 178.2(5)  |
| C4 | C1 | C5  | C10 | 47.6(5)   | C20 | C3  | C4  | O3  | -2.2(8)   |
| C4 | C1 | C11 | C12 | -20.1(5)  | C11 | C14 | C15 | C16 | 178.0(3)  |
| C4 | C1 | C11 | C16 | 162.3(3)  | N1  | C2  | C3  | C4  | 124.5(3)  |
| C5 | C1 | C2  | C3  | -114.7(3) | N1  | C2  | C3  | C20 | -54.4(6)  |
| C5 | C1 | C2  | N1  | 125.3(4)  | N1  | C17 | C18 | O1  | 18.9(4)   |
| C5 | C1 | C4  | C3  | 115.4(3)  | N1  | C19 | O1  | C18 | 6.9(4)    |
| C5 | C1 | C4  | O3  | -64.2(6)  | O1  | C19 | N1  | C2  | -176.5(3) |
| C5 | C1 | C11 | C12 | 109.5(4)  | O1  | C19 | N1  | C17 | 6.6(5)    |
| C5 | C1 | C11 | C16 | -68.1(4)  | O2  | C19 | N1  | C2  | 3.7(6)    |
| C5 | C6 | C7  | C8  | 1.2(6)    | O2  | C19 | N1  | C17 | -173.2(4) |
| C6 | C5 | C10 | C9  | -0.8(6)   | O2  | C19 | O1  | C18 | -173.2(3) |

**Table S14 Hydrogen Atom Coordinates ( $\text{\AA} \times 10^4$ ) and Isotropic Displacement Parameters ( $\text{\AA}^2 \times 10^3$ ) for 230734lt\_auto.**

| Atom | x       | y        | z       | U(eq) |
|------|---------|----------|---------|-------|
| H2   | 728.31  | -1191.86 | 5440.41 | 23    |
| H6   | 1059.32 | -578.33  | 2927.63 | 28    |
| H7   | 2917.73 | 36.04    | 1525.05 | 29    |



**Table S14 Hydrogen Atom Coordinates ( $\text{\AA}\times 10^4$ ) and Isotropic Displacement Parameters ( $\text{\AA}^2\times 10^3$ ) for 230734lt\_auto.**

| Atom | x        | y        | z       | U(eq) |
|------|----------|----------|---------|-------|
| H8   | 4568.45  | -1294.5  | 758.67  | 32    |
| H9   | 4458.04  | -3199.41 | 1505.08 | 32    |
| H10  | 2652.5   | -3823.19 | 2956.7  | 26    |
| H12  | -761.52  | -4801.39 | 2900.43 | 27    |
| H13  | -2833.73 | -5343.7  | 617.17  | 32    |
| H15  | -3584.16 | -2037.76 | -783.98 | 26    |
| H16  | -1529.87 | -1502.84 | 1492.89 | 24    |
| H17A | -2449.46 | -2479.34 | 6641.88 | 26    |
| H17B | -3173.04 | -2726.28 | 4617.56 | 26    |
| H18A | -5007.65 | -1449.31 | 4852.27 | 27    |
| H18B | -3949.91 | -920.82  | 6605.26 | 27    |
| H20A | 1104.44  | -3511.85 | 8913.62 | 30    |
| H20B | 383.09   | -2223.14 | 8905.86 | 30    |

### Experimental

Single crystals of  $\text{C}_{20}\text{H}_{16}\text{ClNO}_3$  [230734lt\_auto] were [ ]. A suitable crystal was selected and [ ] on a **XtaLAB Synergy R, DW system, HyPix-Arc 150** diffractometer. The crystal was kept at 99.98(10) K during data collection. Using Olex2 [1], the structure was solved with the SHELXS [2] structure solution program using Direct Methods and refined with the SHELXL [3] refinement package using Least Squares minimisation.

1. Dolomanov, O.V., Bourhis, L.J., Gildea, R.J, Howard, J.A.K. & Puschmann, H. (2009), *J. Appl. Cryst.* 42, 339-341.
2. Sheldrick, G.M. (2008). *Acta Cryst.* A64, 112-122.
3. Sheldrick, G.M. (2015). *Acta Cryst.* C71, 3-8.

### Crystal structure determination of [230734lt\_auto]

**Crystal Data** for  $\text{C}_{20}\text{H}_{16}\text{ClNO}_3$  ( $M = 353.79$  g/mol): monoclinic, space group Pc (no. 7),  $a = 9.0167(3)$   $\text{\AA}$ ,  $b = 11.7335(4)$   $\text{\AA}$ ,  $c = 8.0325(2)$   $\text{\AA}$ ,  $\beta = 104.733(3)^\circ$ ,  $V = 821.88(4)$   $\text{\AA}^3$ ,  $Z = 2$ ,  $T = 99.98(10)$  K,  $\mu(\text{Cu K}\alpha) = 2.223$   $\text{mm}^{-1}$ ,  $D_{\text{calc}} = 1.430$   $\text{g/cm}^3$ , 5108 reflections measured ( $7.534^\circ \leq 2\theta \leq 133.126^\circ$ ), 2012 unique ( $R_{\text{int}} = 0.0316$ ,  $R_{\text{sigma}} = 0.0357$ ) which were used in all calculations. The final  $R_1$  was 0.0408 ( $I > 2\sigma(I)$ ) and  $wR_2$  was 0.1038 (all data).

### Refinement model description

Number of restraints - 2, number of constraints - unknown.

Details:

1. Twinned data refinement  
Scales: 0.97(3)

0.03(3)  
2. Fixed Uiso  
At 1.2 times of:  
All C(H) groups, All C(H,H) groups  
3.a Ternary CH refined with riding coordinates:  
C2(H2)  
3.b Secondary CH2 refined with riding coordinates:  
C17(H17A,H17B), C18(H18A,H18B)  
3.c Aromatic/amide H refined with riding coordinates:  
C6(H6), C7(H7), C8(H8), C9(H9), C10(H10), C12(H12), C13(H13), C15(H15),  
C16(H16)  
3.d X=CH2 refined with riding coordinates:  
C20(H20A,H20B)

**(c) X-ray crystallographic data of compound (3m):**

Ellipsoid contour %probability level = 50%

**Experimental:** The sample was dissolved in appropriate amount of Dichloromethane followed by the addition of pentane to furnish a saturated solution. Afterwards, the mixture was allowed to stand at room temperature to form the crystals.

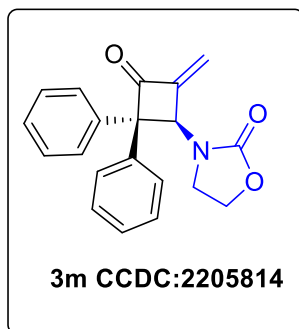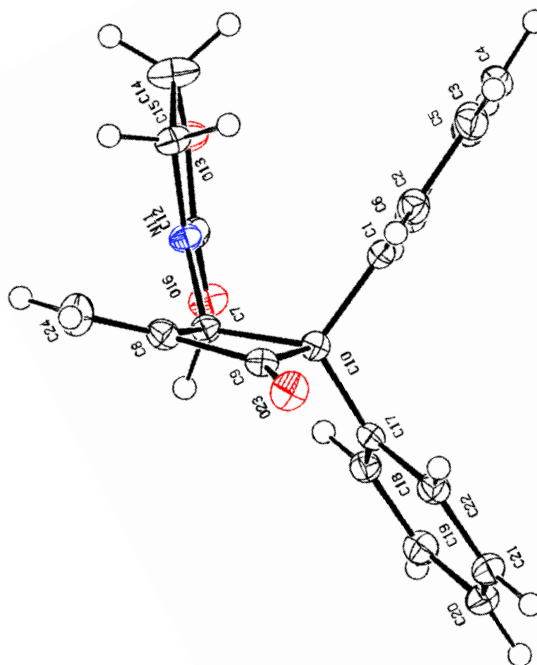

# 220677lt\_auto

**Table S15 Crystal data and structure refinement for 220677lt\_auto.**

|                                    |                                                               |
|------------------------------------|---------------------------------------------------------------|
| Identification code                | 220677lt_auto                                                 |
| Empirical formula                  | C <sub>20</sub> H <sub>17</sub> NO <sub>3</sub>               |
| Formula weight                     | 319.35                                                        |
| Temperature/K                      | 100.00(10)                                                    |
| Crystal system                     | orthorhombic                                                  |
| Space group                        | Pbca                                                          |
| a/Å                                | 8.86145(10)                                                   |
| b/Å                                | 18.8062(2)                                                    |
| c/Å                                | 19.06566(19)                                                  |
| α/°                                | 90                                                            |
| β/°                                | 90                                                            |
| γ/°                                | 90                                                            |
| Volume/Å <sup>3</sup>              | 3177.30(6)                                                    |
| Z                                  | 8                                                             |
| ρ <sub>calc</sub> /cm <sup>3</sup> | 1.335                                                         |
| μ/mm <sup>-1</sup>                 | 0.729                                                         |
| F(000)                             | 1344.0                                                        |
| Crystal size/mm <sup>3</sup>       | 0.23 × 0.22 × 0.19                                            |
| Radiation                          | Cu Kα (λ = 1.54184)                                           |
| 2θ range for data collection/°     | 9.278 to 134.15                                               |
| Index ranges                       | -10 ≤ h ≤ 10, -22 ≤ k ≤ 22, -17 ≤ l ≤ 22                      |
| Reflections collected              | 23337                                                         |
| Independent reflections            | 2834 [R <sub>int</sub> = 0.0211, R <sub>sigma</sub> = 0.0125] |

Data/restraints/parameters 2834/0/218  
 Goodness-of-fit on  $F^2$  1.039  
 Final R indexes [ $I \geq 2\sigma(I)$ ]  $R_1 = 0.0325$ ,  $wR_2 = 0.0784$   
 Final R indexes [all data]  $R_1 = 0.0340$ ,  $wR_2 = 0.0793$   
 Largest diff. peak/hole /  $e \text{ \AA}^{-3}$  0.26/-0.17

**Table S16 Fractional Atomic Coordinates ( $\times 10^4$ ) and Equivalent Isotropic Displacement Parameters ( $\text{\AA}^2 \times 10^3$ ) for 220677lt\_auto.  $U_{eq}$  is defined as 1/3 of the trace of the orthogonalised  $U_{ij}$  tensor.**

| Atom | x           | y          | z          | U(eq)    |
|------|-------------|------------|------------|----------|
| C1   | 3713.6 (13) | 3564.0 (6) | 3862.6 (6) | 16.6 (2) |
| C2   | 5189.9 (14) | 3397.2 (7) | 4046.9 (6) | 21.5 (3) |
| C3   | 6392.9 (14) | 3751.6 (8) | 3735.9 (7) | 26.8 (3) |
| C4   | 6137.3 (15) | 4278.2 (7) | 3244.3 (7) | 27.0 (3) |
| C5   | 4668.7 (15) | 4435.1 (7) | 3040.3 (6) | 23.9 (3) |
| C6   | 3465.1 (14) | 4077.3 (6) | 3344.0 (6) | 19.9 (3) |
| C7   | 1339.7 (13) | 3735.8 (6) | 4666.9 (6) | 15.7 (2) |
| C8   | 1926.0 (13) | 3376.3 (6) | 5329.2 (6) | 18.6 (3) |
| C9   | 2733.8 (13) | 2829.7 (6) | 4910.7 (6) | 17.7 (3) |
| C10  | 2362.9 (13) | 3207.1 (6) | 4206.6 (6) | 15.8 (2) |
| C12  | 809.3 (13)  | 4904.5 (6) | 4168.0 (6) | 17.8 (3) |
| C14  | 2721.1 (16) | 5594.5 (7) | 4597.2 (8) | 30.4 (3) |
| C15  | 2876.5 (14) | 4862.7 (6) | 4927.5 (6) | 20.0 (3) |
| C17  | 1526.9 (13) | 2742.8 (6) | 3681.7 (6) | 16.1 (2) |
| C18  | 297.3 (13)  | 2994.4 (6) | 3302.6 (6) | 18.7 (3) |
| C19  | -401.6 (14) | 2565.4 (7) | 2805.0 (6) | 21.9 (3) |
| C20  | 123.5 (14)  | 1879.7 (7) | 2684.5 (6) | 22.6 (3) |

**Table S16 Fractional Atomic Coordinates ( $\times 10^4$ ) and Equivalent Isotropic Displacement Parameters ( $\text{\AA}^2 \times 10^3$ ) for 220677lt\_auto.  $U_{eq}$  is defined as 1/3 of the trace of the orthogonalised  $U_{ij}$  tensor.**

| Atom | <i>x</i>    | <i>y</i>   | <i>z</i>   | $U_{eq}$ |
|------|-------------|------------|------------|----------|
| C21  | 1352.1 (14) | 1628.5 (6) | 3057.6 (6) | 22.1 (3) |
| C22  | 2058.7 (13) | 2055.7 (6) | 3552.4 (6) | 19.2 (3) |
| C24  | 1883.5 (15) | 3508.8 (7) | 6010.3 (6) | 25.5 (3) |
| N11  | 1594.6 (11) | 4491.9 (5) | 4620.1 (5) | 16.2 (2) |
| O13  | 1419.6 (10) | 5565.9 (4) | 4144.7 (5) | 23.2 (2) |
| O16  | -286.6 (9)  | 4742.4 (4) | 3822.1 (4) | 22.3 (2) |
| O23  | 3382.6 (10) | 2285.1 (4) | 5056.8 (4) | 24.0 (2) |

**Table S17 Anisotropic Displacement Parameters ( $\text{\AA}^2 \times 10^3$ ) for 220677lt\_auto. The Anisotropic displacement factor exponent takes the form:  $-2\pi^2[h^2a^{*2}U_{11}+2hka^*b^*U_{12}+\dots]$ .**

| Atom | $U_{11}$ | $U_{22}$ | $U_{33}$ | $U_{23}$ | $U_{13}$  | $U_{12}$  |
|------|----------|----------|----------|----------|-----------|-----------|
| C1   | 17.2 (6) | 15.9 (6) | 16.9 (5) | -3.8 (4) | 0.8 (4)   | -0.8 (4)  |
| C2   | 18.7 (6) | 24.6 (6) | 21.3 (6) | -3.0 (5) | -0.4 (5)  | 1.9 (5)   |
| C3   | 16.1 (6) | 38.8 (8) | 25.7 (6) | -8.1 (6) | 0.6 (5)   | -1.3 (5)  |
| C4   | 23.6 (6) | 35.0 (7) | 22.3 (6) | -7.5 (5) | 6.8 (5)   | -11.6 (6) |
| C5   | 28.8 (7) | 23.5 (6) | 19.5 (6) | -0.8 (5) | 4.0 (5)   | -5.4 (5)  |
| C6   | 19.4 (6) | 20.7 (6) | 19.6 (6) | -1.1 (5) | 1.0 (5)   | -0.5 (5)  |
| C7   | 16.8 (5) | 13.1 (5) | 17.1 (5) | 0.5 (4)  | 0.8 (4)   | 0.0 (4)   |
| C8   | 19.2 (6) | 15.8 (6) | 20.8 (6) | 3.7 (5)  | 0.7 (5)   | 0.1 (5)   |
| C9   | 17.3 (6) | 15.8 (6) | 19.9 (6) | 1.4 (5)  | -1.0 (5)  | -1.8 (5)  |
| C10  | 15.2 (6) | 14.6 (5) | 17.5 (5) | 0.7 (4)  | -0.2 (4)  | 1.8 (4)   |
| C12  | 19.6 (6) | 14.8 (5) | 19.0 (6) | -0.3 (4) | 1.9 (5)   | 1.5 (5)   |
| C14  | 30.8 (7) | 21.4 (7) | 39.1 (8) | 4.8 (6)  | -14.9 (6) | -6.7 (6)  |

**Table S17 Anisotropic Displacement Parameters ( $\text{\AA}^2 \times 10^3$ ) for 220677lt\_auto. The Anisotropic displacement factor exponent takes the form:  $-2\pi^2[h^2a^{*2}U_{11}+2hka^*b^*U_{12}+\dots]$ .**

| Atom | U <sub>11</sub> | U <sub>22</sub> | U <sub>33</sub> | U <sub>23</sub> | U <sub>13</sub> | U <sub>12</sub> |
|------|-----------------|-----------------|-----------------|-----------------|-----------------|-----------------|
| C15  | 19.8 (6)        | 16.6 (6)        | 23.7 (6)        | -2.1 (5)        | -3.8 (5)        | -1.7 (5)        |
| C17  | 16.6 (5)        | 16.1 (6)        | 15.8 (5)        | 1.4 (4)         | 3.0 (4)         | -2.5 (4)        |
| C18  | 19.2 (6)        | 16.9 (6)        | 20.1 (6)        | 0.5 (5)         | 1.5 (5)         | 0.1 (5)         |
| C19  | 20.7 (6)        | 24.4 (6)        | 20.4 (6)        | 1.5 (5)         | -1.9 (5)        | -1.0 (5)        |
| C20  | 24.7 (6)        | 23.1 (6)        | 19.9 (6)        | -3.5 (5)        | 0.5 (5)         | -6.0 (5)        |
| C21  | 25.7 (6)        | 16.2 (6)        | 24.4 (6)        | -2.0 (5)        | 3.7 (5)         | -1.1 (5)        |
| C22  | 19.4 (6)        | 17.4 (6)        | 20.8 (6)        | 1.8 (5)         | 0.7 (5)         | 0.0 (5)         |
| C24  | 31.2 (7)        | 25.0 (6)        | 20.3 (6)        | 2.7 (5)         | 0.3 (5)         | 6.2 (5)         |
| N11  | 16.8 (5)        | 13.3 (5)        | 18.3 (5)        | 0.2 (4)         | -2.1 (4)        | 0.0 (4)         |
| O13  | 25.4 (5)        | 14.5 (4)        | 29.6 (5)        | 3.4 (3)         | -6.1 (4)        | -1.9 (3)        |
| O16  | 21.4 (4)        | 19.7 (4)        | 25.8 (4)        | 0.7 (3)         | -6.0 (4)        | 1.1 (3)         |
| O23  | 27.6 (5)        | 19.3 (4)        | 25.1 (5)        | 3.0 (4)         | -3.0 (4)        | 6.2 (4)         |

**Table S18 Bond Lengths for 220677lt\_auto.**

| Atom Atom | Length/ $\text{\AA}$ | Atom Atom | Length/ $\text{\AA}$ |
|-----------|----------------------|-----------|----------------------|
| C1 C2     | 1.3904 (17)          | C10 C17   | 1.5206 (16)          |
| C1 C6     | 1.3993 (17)          | C12 N11   | 1.3524 (15)          |
| C1 C10    | 1.5209 (16)          | C12 O13   | 1.3570 (14)          |
| C2 C3     | 1.3900 (18)          | C12 O16   | 1.2129 (15)          |
| C3 C4     | 1.382 (2)            | C14 C15   | 1.5198 (17)          |
| C4 C5     | 1.3900 (19)          | C14 O13   | 1.4412 (15)          |
| C5 C6     | 1.3877 (17)          | C15 N11   | 1.4561 (15)          |
| C7 C8     | 1.5236 (16)          | C17 C18   | 1.3906 (16)          |

**Table S18 Bond Lengths for 220677lt\_auto.**

| Atom | Atom | Length/Å    | Atom | Atom | Length/Å    |
|------|------|-------------|------|------|-------------|
| C7   | C10  | 1.6065 (15) | C17  | C22  | 1.3974 (16) |
| C7   | N11  | 1.4426 (14) | C18  | C19  | 1.3907 (17) |
| C8   | C9   | 1.4851 (16) | C19  | C20  | 1.3902 (18) |
| C8   | C24  | 1.3229 (17) | C20  | C21  | 1.3837 (18) |
| C9   | C10  | 1.5537 (15) | C21  | C22  | 1.3884 (17) |
| C9   | O23  | 1.2071 (14) |      |      |             |

**Table S19 Bond Angles for 220677lt\_auto.**

| Atom | Atom | Atom | Angle/°     | Atom | Atom | Atom | Angle/°     |
|------|------|------|-------------|------|------|------|-------------|
| C2   | C1   | C6   | 118.83 (11) | C17  | C10  | C1   | 110.67 (9)  |
| C2   | C1   | C10  | 122.14 (10) | C17  | C10  | C7   | 116.10 (9)  |
| C6   | C1   | C10  | 119.03 (10) | C17  | C10  | C9   | 114.17 (9)  |
| C3   | C2   | C1   | 120.38 (12) | N11  | C12  | O13  | 109.98 (10) |
| C4   | C3   | C2   | 120.47 (12) | O16  | C12  | N11  | 127.90 (11) |
| C3   | C4   | C5   | 119.69 (12) | O16  | C12  | O13  | 122.12 (10) |
| C6   | C5   | C4   | 119.99 (12) | O13  | C14  | C15  | 106.66 (10) |
| C5   | C6   | C1   | 120.56 (11) | N11  | C15  | C14  | 101.32 (9)  |
| C8   | C7   | C10  | 89.18 (8)   | C18  | C17  | C10  | 121.90 (10) |
| N11  | C7   | C8   | 115.80 (9)  | C18  | C17  | C22  | 119.15 (11) |
| N11  | C7   | C10  | 119.21 (9)  | C22  | C17  | C10  | 118.87 (10) |
| C9   | C8   | C7   | 91.50 (9)   | C17  | C18  | C19  | 120.41 (11) |
| C24  | C8   | C7   | 136.08 (11) | C20  | C19  | C18  | 120.12 (11) |
| C24  | C8   | C9   | 132.18 (11) | C21  | C20  | C19  | 119.68 (11) |

**Table S19 Bond Angles for 220677lt\_auto.**

| Atom | Atom | Atom | Angle/°     | Atom | Atom | Atom | Angle/°     |
|------|------|------|-------------|------|------|------|-------------|
| C8   | C9   | C10  | 92.64 (9)   | C20  | C21  | C22  | 120.44 (11) |
| O23  | C9   | C8   | 133.86 (11) | C21  | C22  | C17  | 120.20 (11) |
| O23  | C9   | C10  | 133.45 (11) | C7   | N11  | C15  | 124.70 (9)  |
| C1   | C10  | C7   | 113.99 (9)  | C12  | N11  | C7   | 121.63 (10) |
| C1   | C10  | C9   | 114.06 (9)  | C12  | N11  | C15  | 112.53 (9)  |
| C9   | C10  | C7   | 85.99 (8)   | C12  | O13  | C14  | 109.49 (9)  |

**Table S20 Torsion Angles for 220677lt\_auto.**

| A  | B   | C   | D   | Angle/°     | A   | B   | C   | D   | Angle/°     |
|----|-----|-----|-----|-------------|-----|-----|-----|-----|-------------|
| C1 | C2  | C3  | C4  | 0.56 (19)   | C10 | C7  | C8  | C24 | 168.32 (15) |
| C1 | C10 | C17 | C18 | -94.03 (12) | C10 | C7  | N11 | C12 | 93.20 (13)  |
| C1 | C10 | C17 | C22 | 82.72 (12)  | C10 | C7  | N11 | C15 | -73.67 (14) |
| C2 | C1  | C6  | C5  | -2.71 (17)  | C10 | C17 | C18 | C19 | 177.25 (11) |
| C2 | C1  | C10 | C7  | 114.13 (12) | C10 | C17 | C22 | C21 | 177.68 (10) |
| C2 | C1  | C10 | C9  | 17.54 (15)  | C14 | C15 | N11 | C7  | 169.40 (11) |
| C2 | C1  | C10 | C17 | 112.82 (12) | C14 | C15 | N11 | C12 | 1.49 (13)   |
| C2 | C3  | C4  | C5  | -2.47 (19)  | C15 | C14 | O13 | C12 | -0.53 (14)  |
| C3 | C4  | C5  | C6  | 1.77 (19)   | C17 | C18 | C19 | C20 | 0.18 (18)   |
| C4 | C5  | C6  | C1  | 0.84 (18)   | C18 | C17 | C22 | C21 | -0.83 (17)  |
| C6 | C1  | C2  | C3  | 2.01 (17)   | C18 | C19 | C20 | C21 | -0.54 (18)  |
| C6 | C1  | C10 | C7  | -65.83 (13) | C19 | C20 | C21 | C22 | 0.21 (18)   |
| C6 | C1  | C10 | C9  | 162.43 (10) | C20 | C21 | C22 | C17 | 0.48 (18)   |



**Table S20 Torsion Angles for 220677lt\_auto.**

| A   | B   | C   | D   | Angle/°     | A   | B   | C   | D   | Angle/°     |
|-----|-----|-----|-----|-------------|-----|-----|-----|-----|-------------|
| C6  | C1  | C10 | C17 | 67.21 (13)  | C22 | C17 | C18 | C19 | 0.51 (17)   |
| C7  | C8  | C9  | C10 | 6.53 (9)    | C24 | C8  | C9  | C10 | 168.45 (14) |
| C7  | C8  | C9  | O23 | 171.00 (14) | C24 | C8  | C9  | O23 | 14.0 (2)    |
| C7  | C10 | C17 | C18 | 37.94 (15)  | N11 | C7  | C8  | C9  | 128.66 (10) |
| C7  | C10 | C17 | C22 | 145.31 (10) | N11 | C7  | C8  | C24 | 46.0 (2)    |
| C8  | C7  | C10 | C1  | 108.55 (10) | N11 | C7  | C10 | C1  | 10.84 (14)  |
| C8  | C7  | C10 | C9  | 6.04 (8)    | N11 | C7  | C10 | C9  | 125.42 (10) |
| C8  | C7  | C10 | C17 | 121.04 (10) | N11 | C7  | C10 | C17 | 119.58 (11) |
| C8  | C7  | N11 | C12 | 162.20 (10) | N11 | C12 | O13 | C14 | 1.50 (13)   |
| C8  | C7  | N11 | C15 | 30.93 (15)  | O13 | C12 | N11 | C7  | 170.28 (10) |
| C8  | C9  | C10 | C1  | 108.32 (10) | O13 | C12 | N11 | C15 | -1.95 (13)  |
| C8  | C9  | C10 | C7  | -6.20 (9)   | O13 | C14 | C15 | N11 | -0.55 (13)  |
| C8  | C9  | C10 | C17 | 123.07 (10) | O16 | C12 | N11 | C7  | 10.02 (19)  |
| C9  | C10 | C17 | C18 | 135.66 (11) | O16 | C12 | N11 | C15 | 178.35 (12) |
| C9  | C10 | C17 | C22 | -47.59 (14) | O16 | C12 | O13 | C14 | 178.78 (12) |
| C10 | C1  | C2  | C3  | 177.96 (11) | O23 | C9  | C10 | C1  | -74.13 (16) |
| C10 | C1  | C6  | C5  | 177.26 (11) | O23 | C9  | C10 | C7  | 171.35 (14) |
| C10 | C7  | C8  | C9  | -6.31 (9)   | O23 | C9  | C10 | C17 | 54.48 (18)  |

**Table S21 Hydrogen Atom Coordinates ( $\text{\AA}\times 10^4$ ) and Isotropic Displacement Parameters ( $\text{\AA}^2\times 10^3$ ) for 220677lt\_auto.**

| Atom | x        | y       | z       | U(eq) |
|------|----------|---------|---------|-------|
| H2   | 5377.46  | 3039.06 | 4387.24 | 26    |
| H3   | 7397.93  | 3630.98 | 3862.09 | 32    |
| H4   | 6961.48  | 4531.65 | 3046.75 | 32    |
| H5   | 4488.91  | 4787.29 | 2692.99 | 29    |
| H6   | 2463.91  | 4181.67 | 3198.57 | 24    |
| H7   | 245.61   | 3625.81 | 4598.06 | 19    |
| H14A | 2580.44  | 5960.83 | 4964.32 | 37    |
| H14B | 3636.37  | 5713.23 | 4323.37 | 37    |
| H15A | 3843.46  | 4634.65 | 4797.08 | 24    |
| H15B | 2796.87  | 4885.9  | 5444.95 | 24    |
| H18  | -67.66   | 3462.14 | 3383.94 | 22    |
| H19  | -1239.41 | 2741.38 | 2547.08 | 26    |
| H20  | -358.71  | 1584.97 | 2347.54 | 27    |
| H21  | 1714.46  | 1160.54 | 2974.75 | 26    |
| H22  | 2906.32  | 1880.44 | 3803.77 | 23    |
| H24A | 2448.16  | 3222.45 | 6325.9  | 31    |
| H24B | 1288.3   | 3890.36 | 6183.86 | 31    |

### Experimental

Single crystals of  $\text{C}_{20}\text{H}_{17}\text{NO}_3$  [220677lt\_auto] were [ ]. A suitable crystal was selected and [ ] on a **XtaLAB Synergy R, DW system, HyPix-Arc 150** diffractometer. The crystal was kept at 100.00(10) K during data collection. Using Olex2 [1], the structure was solved with the SHELXT [2] structure solution program using Intrinsic Phasing and refined with the SHELXL [3] refinement package using Least Squares minimisation.

1. Dolomanov, O.V., Bourhis, L.J., Gildea, R.J., Howard, J.A.K. & Puschmann, H. (2009), *J. Appl. Cryst.* 42, 339-341.
2. Sheldrick, G.M. (2015). *Acta Cryst. A*71, 3-8.
3. Sheldrick, G.M. (2015). *Acta Cryst. C*71, 3-8.

### Crystal structure determination of [220677lt\_auto]

**Crystal Data** for  $C_{20}H_{17}NO_3$  ( $M = 319.35$  g/mol): orthorhombic, space group  $Pbca$  (no. 61),  $a = 8.86145(10)$  Å,  $b = 18.8062(2)$  Å,  $c = 19.06566(19)$  Å,  $V = 3177.30(6)$  Å<sup>3</sup>,  $Z = 8$ ,  $T = 100.00(10)$  K,  $\mu(\text{Cu K}\alpha) = 0.729$  mm<sup>-1</sup>,  $D_{\text{calc}} = 1.335$  g/cm<sup>3</sup>, 23337 reflections measured ( $9.278^\circ \leq 2\theta \leq 134.15^\circ$ ), 2834 unique ( $R_{\text{int}} = 0.0211$ ,  $R_{\text{sigma}} = 0.0125$ ) which were used in all calculations. The final  $R_1$  was 0.0325 ( $I > 2\sigma(I)$ ) and  $wR_2$  was 0.0793 (all data).

### Refinement model description

Number of restraints - 0, number of constraints - unknown.

#### Details:

1. Fixed Uiso

At 1.2 times of:

All C(H) groups, All C(H,H) groups

2.a Ternary CH refined with riding coordinates:

C7 (H7)

2.b Secondary CH<sub>2</sub> refined with riding coordinates:

C14 (H14A, H14B), C15 (H15A, H15B)

2.c Aromatic/amide H refined with riding coordinates:

C2 (H2), C3 (H3), C4 (H4), C5 (H5), C6 (H6), C18 (H18), C19 (H19), C20 (H20), C21 (H21), C22 (H22)

2.d X=CH<sub>2</sub> refined with riding coordinates:

C24 (H24A, H24B)

### (d) X-ray crystallographic data of compound (4f):

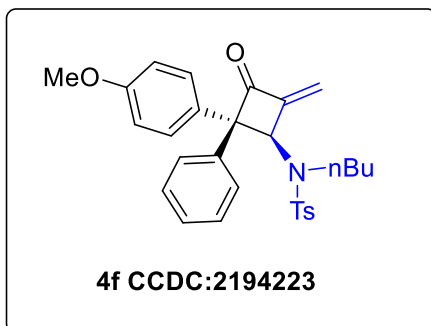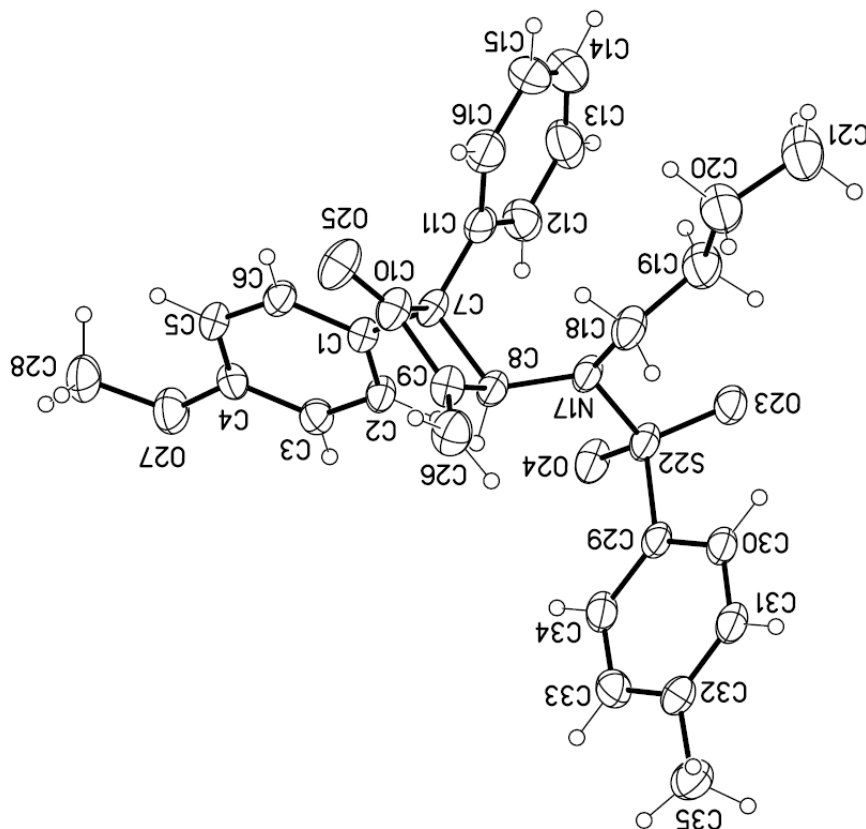

Ellipsoid contour %probability level = 50%

**Experimental:** The sample was dissolved in appropriate amount of Dichloromethane followed by the addition of pentane to furnish a saturated solution. Afterwards, the mixture was allowed to stand at room temperature to form the crystals.

## 220766lt\_auto

**Table S22 Crystal data and structure refinement for 220766lt\_auto.**

|                                    |                                                   |
|------------------------------------|---------------------------------------------------|
| Identification code                | 220766lt_auto                                     |
| Empirical formula                  | C <sub>29</sub> H <sub>29</sub> NO <sub>4</sub> S |
| Formula weight                     | 487.59                                            |
| Temperature/K                      | 99.99(10)                                         |
| Crystal system                     | triclinic                                         |
| Space group                        | P-1                                               |
| a/Å                                | 7.73568(18)                                       |
| b/Å                                | 12.3470(3)                                        |
| c/Å                                | 14.4133(3)                                        |
| α/°                                | 69.991(2)                                         |
| β/°                                | 83.0268(19)                                       |
| γ/°                                | 79.978(2)                                         |
| Volume/Å <sup>3</sup>              | 1270.97(5)                                        |
| Z                                  | 2                                                 |
| ρ <sub>calc</sub> /cm <sup>3</sup> | 1.274                                             |
| μ/mm <sup>-1</sup>                 | 1.414                                             |
| F(000)                             | 516.0                                             |

|                                             |                                                               |
|---------------------------------------------|---------------------------------------------------------------|
| Crystal size/mm <sup>3</sup>                | 0.13 × 0.11 × 0.08                                            |
| Radiation                                   | Cu Kα (λ = 1.54184)                                           |
| 2θ range for data collection/°              | 6.542 to 134.038                                              |
| Index ranges                                | -9 ≤ h ≤ 9, -14 ≤ k ≤ 14, -17 ≤ l ≤ 15                        |
| Reflections collected                       | 13857                                                         |
| Independent reflections                     | 4513 [R <sub>int</sub> = 0.0206, R <sub>sigma</sub> = 0.0239] |
| Data/restraints/parameters                  | 4513/0/320                                                    |
| Goodness-of-fit on F <sup>2</sup>           | 1.065                                                         |
| Final R indexes [I >= 2σ (I)]               | R <sub>1</sub> = 0.0593, wR <sub>2</sub> = 0.1650             |
| Final R indexes [all data]                  | R <sub>1</sub> = 0.0639, wR <sub>2</sub> = 0.1686             |
| Largest diff. peak/hole / e Å <sup>-3</sup> | 0.83/-0.40                                                    |

**Table S23 Fractional Atomic Coordinates (×10<sup>4</sup>) and Equivalent Isotropic Displacement Parameters (Å<sup>2</sup>×10<sup>3</sup>) for 220766lt\_auto. U<sub>eq</sub> is defined as 1/3 of the trace of the orthogonalised U<sub>ij</sub> tensor.**

| Atom | x        | y        | z           | U(eq)    |
|------|----------|----------|-------------|----------|
| C1   | 4732 (3) | 7877 (2) | 3994.7 (19) | 27.2 (6) |
| C2   | 2928 (3) | 7971 (2) | 3909.8 (19) | 28.8 (6) |
| C3   | 1714 (4) | 8385 (2) | 4540.3 (19) | 31.3 (6) |
| C4   | 2279 (4) | 8704 (2) | 5278.5 (19) | 31.6 (6) |
| C5   | 4062 (4) | 8641 (3) | 5359 (2)    | 33.6 (6) |
| C6   | 5267 (4) | 8234 (2) | 4717.1 (19) | 30.4 (6) |
| C7   | 6116 (3) | 7426 (2) | 3312 (2)    | 28.8 (6) |
| C8   | 5594 (4) | 6351 (2) | 3080.0 (19) | 29.5 (6) |
| C9   | 7044 (4) | 5547 (3) | 3722 (2)    | 34.3 (6) |
| C10  | 7593 (4) | 6547 (3) | 3911 (2)    | 35.6 (6) |
| C11  | 6711 (4) | 8407 (3) | 2424 (2)    | 34.3 (6) |

**Table S23 Fractional Atomic Coordinates ( $\times 10^4$ ) and Equivalent Isotropic Displacement Parameters ( $\text{\AA}^2 \times 10^3$ ) for 220766lt\_auto.  $U_{\text{eq}}$  is defined as 1/3 of the trace of the orthogonalised  $U_{\text{IJ}}$  tensor.**

| Atom | <i>x</i>  | <i>y</i>    | <i>z</i>    | $U(\text{eq})$ |
|------|-----------|-------------|-------------|----------------|
| C12  | 5489 (4)  | 9188 (3)    | 1805 (2)    | 41.2 (7)       |
| C13  | 5974 (5)  | 10119 (3)   | 998 (2)     | 51.3 (9)       |
| C14  | 7717 (6)  | 10277 (3)   | 791 (3)     | 58.1 (10)      |
| C15  | 8947 (5)  | 9499 (4)    | 1361 (3)    | 55.2 (9)       |
| C16  | 8482 (4)  | 8554 (3)    | 2190 (3)    | 48.2 (8)       |
| C18  | 7442 (4)  | 6118 (3)    | 1574 (2)    | 39.1 (7)       |
| C19  | 7880 (4)  | 6822 (3)    | 529 (2)     | 47.4 (8)       |
| C20  | 9848 (4)  | 6567 (4)    | 268 (3)     | 54.9 (9)       |
| C21  | 10330 (5) | 7125 (4)    | -823 (3)    | 58.9 (10)      |
| C26  | 7629 (5)  | 4411 (3)    | 4020 (2)    | 44.4 (7)       |
| C28  | 1596 (5)  | 9296 (3)    | 6705 (2)    | 48.8 (8)       |
| C29  | 3641 (3)  | 4868 (3)    | 1994.1 (19) | 30.6 (6)       |
| C30  | 4563 (4)  | 4155 (3)    | 1476 (2)    | 32.3 (6)       |
| C31  | 4353 (4)  | 2996 (3)    | 1782 (2)    | 35.0 (6)       |
| C32  | 3215 (4)  | 2523 (3)    | 2597 (2)    | 35.7 (6)       |
| C33  | 2297 (4)  | 3252 (3)    | 3101 (2)    | 38.5 (7)       |
| C34  | 2505 (4)  | 4413 (3)    | 2814 (2)    | 35.5 (6)       |
| C35  | 2971 (5)  | 1264 (3)    | 2897 (2)    | 45.8 (8)       |
| N17  | 5711 (3)  | 6444 (2)    | 2032.4 (16) | 30.3 (5)       |
| O23  | 4182 (2)  | 6724.9 (18) | 536.8 (14)  | 35.1 (5)       |
| O24  | 2484 (2)  | 6939.5 (18) | 2052.0 (15) | 37.0 (5)       |
| O25  | 8743 (3)  | 6644 (2)    | 4364.8 (18) | 48.4 (6)       |
| O27  | 1013 (3)  | 9034 (2)    | 5911.0 (15) | 43.6 (5)       |

**Table S23 Fractional Atomic Coordinates ( $\times 10^4$ ) and Equivalent Isotropic Displacement Parameters ( $\text{\AA}^2 \times 10^3$ ) for 220766lt\_auto.  $U_{\text{eq}}$  is defined as 1/3 of the trace of the orthogonalised  $U_{\text{IJ}}$  tensor.**

| Atom | $x$        | $y$        | $z$        | $U(\text{eq})$ |
|------|------------|------------|------------|----------------|
| S22  | 3910.1 (8) | 6350.0 (6) | 1592.2 (5) | 30.6 (2)       |

**Table S24 Anisotropic Displacement Parameters ( $\text{\AA}^2 \times 10^3$ ) for 220766lt\_auto. The Anisotropic displacement factor exponent takes the form:  $-2\pi^2[h^2a^*^2U_{11}+2hka^*b^*U_{12}+\dots]$ .**

| Atom | $U_{11}$  | $U_{22}$  | $U_{33}$  | $U_{23}$   | $U_{13}$  | $U_{12}$   |
|------|-----------|-----------|-----------|------------|-----------|------------|
| C1   | 29.1 (13) | 29.7 (13) | 25.2 (12) | -11.5 (10) | -4.1 (10) | -3.8 (10)  |
| C2   | 29.9 (13) | 34.8 (14) | 25.6 (12) | -13.7 (11) | -5.4 (10) | -4.9 (11)  |
| C3   | 28.8 (14) | 37.9 (15) | 28.7 (13) | -12.4 (11) | -0.6 (11) | -7.0 (11)  |
| C4   | 37.6 (15) | 34.3 (14) | 24.2 (13) | -11.9 (11) | 3.9 (11)  | -8.1 (11)  |
| C5   | 40.6 (16) | 39.8 (15) | 27.1 (13) | -15.9 (12) | -4.0 (11) | -11.3 (12) |
| C6   | 29.4 (14) | 35.4 (14) | 30.3 (13) | -13.6 (11) | -6.1 (11) | -6.4 (11)  |
| C7   | 25.6 (13) | 34.6 (14) | 32.9 (14) | -18.6 (12) | -7.6 (11) | -2.5 (11)  |
| C8   | 29.9 (13) | 34.2 (14) | 30.2 (13) | -16.7 (11) | -3.8 (11) | -5.8 (11)  |
| C9   | 36.3 (15) | 37.1 (15) | 32.2 (14) | -15.5 (12) | -5.4 (12) | -1.6 (12)  |
| C10  | 31.5 (15) | 42.3 (16) | 38.2 (15) | -20.3 (13) | -9.0 (12) | 0.1 (12)   |
| C11  | 38.1 (15) | 40.3 (16) | 35.1 (15) | -25.5 (13) | 6.5 (12)  | -12.9 (12) |
| C12  | 46.0 (17) | 41.5 (17) | 36.7 (16) | -15.5 (13) | 3.5 (13)  | -6.5 (13)  |
| C13  | 74 (2)    | 44.7 (18) | 34.7 (16) | -15.7 (14) | 6.1 (16)  | -8.0 (17)  |
| C14  | 79 (3)    | 57 (2)    | 41.0 (18) | -15.0 (16) | 9.1 (18)  | -25 (2)    |
| C15  | 55 (2)    | 73 (2)    | 46.6 (19) | -26.3 (18) | 17.7 (17) | -35.2 (19) |
| C16  | 42.3 (18) | 65 (2)    | 46.6 (18) | -27.9 (17) | 3.3 (14)  | -15.9 (16) |
| C18  | 26.5 (14) | 59.1 (19) | 42.0 (16) | -29.7 (15) | -4.4 (12) | -4.8 (13)  |
| C19  | 35.1 (16) | 71 (2)    | 41.1 (17) | -22.7 (16) | -3.9 (13) | -9.6 (15)  |

**Table S24 Anisotropic Displacement Parameters ( $\text{\AA}^2 \times 10^3$ ) for 220766lt\_auto. The Anisotropic displacement factor exponent takes the form:  $-2\pi^2[h^2a^{*2}U_{11}+2hka^*b^*U_{12}+\dots]$ .**

| Atom | U <sub>11</sub> | U <sub>22</sub> | U <sub>33</sub> | U <sub>23</sub> | U <sub>13</sub> | U <sub>12</sub> |
|------|-----------------|-----------------|-----------------|-----------------|-----------------|-----------------|
| C20  | 32.0 (17)       | 93 (3)          | 43.7 (18)       | -25.0 (19)      | -1.7 (14)       | -14.6 (17)      |
| C21  | 35.9 (18)       | 99 (3)          | 44.8 (19)       | -28 (2)         | -4.6 (14)       | -7.6 (18)       |
| C26  | 52.1 (19)       | 38.7 (17)       | 40.5 (17)       | -12.8 (14)      | -5.6 (14)       | -0.2 (14)       |
| C28  | 53 (2)          | 65 (2)          | 37.9 (17)       | -30.2 (16)      | 5.3 (14)        | -12.4 (17)      |
| C29  | 26.2 (13)       | 44.4 (16)       | 28.9 (13)       | -18.8 (12)      | -3.6 (11)       | -9.8 (11)       |
| C30  | 28.5 (14)       | 46.3 (16)       | 29.1 (13)       | -19.6 (12)      | -2.0 (11)       | -9.0 (12)       |
| C31  | 33.6 (15)       | 45.9 (17)       | 33.2 (15)       | -21.5 (13)      | -6.0 (12)       | -6.0 (12)       |
| C32  | 33.5 (15)       | 45.4 (17)       | 32.9 (14)       | -13.8 (13)      | -11.7 (12)      | -9.6 (12)       |
| C33  | 33.1 (15)       | 54.3 (19)       | 30.4 (14)       | -14.1 (13)      | 0.1 (12)        | -13.2 (13)      |
| C34  | 29.6 (14)       | 54.3 (18)       | 30.0 (14)       | -22.3 (13)      | -0.5 (11)       | -9.2 (13)       |
| C35  | 49.1 (19)       | 46.6 (18)       | 45.1 (18)       | -12.6 (15)      | -13.0 (14)      | -14.2 (15)      |
| N17  | 27.0 (11)       | 41.2 (13)       | 31.1 (12)       | -21.3 (10)      | -3.4 (9)        | -6.8 (10)       |
| O23  | 31.2 (10)       | 48.6 (12)       | 30.3 (10)       | -16.9 (9)       | -4.7 (8)        | -8.9 (9)        |
| O24  | 28.1 (10)       | 50.8 (12)       | 40.9 (11)       | -27.8 (10)      | -5.2 (8)        | -0.3 (9)        |
| O25  | 40.2 (12)       | 55.6 (14)       | 59.4 (14)       | -29.7 (12)      | -22.9 (11)      | 2.9 (10)        |
| O27  | 40.8 (12)       | 58.6 (14)       | 37.2 (11)       | -25.3 (10)      | 2.2 (9)         | -5.5 (10)       |
| S22  | 25.4 (4)        | 43.3 (4)        | 31.3 (4)        | -21.5 (3)       | -3.6 (3)        | -5.8 (3)        |

**Table S25 Bond Lengths for 220766lt\_auto.**

| Atom Atom | Length/ $\text{\AA}$ | Atom Atom | Length/ $\text{\AA}$ |
|-----------|----------------------|-----------|----------------------|
| C1 C2     | 1.397 (4)            | C13 C14   | 1.378 (6)            |
| C1 C6     | 1.390 (4)            | C14 C15   | 1.355 (6)            |
| C1 C7     | 1.528 (4)            | C15 C16   | 1.417 (5)            |



**Table S25 Bond Lengths for 220766lt\_auto.**

| Atom | Atom | Length/Å  | Atom | Atom | Length/Å  |
|------|------|-----------|------|------|-----------|
| C2   | C3   | 1.382 (4) | C18  | C19  | 1.491 (4) |
| C3   | C4   | 1.393 (4) | C18  | N17  | 1.474 (3) |
| C4   | C5   | 1.384 (4) | C19  | C20  | 1.528 (4) |
| C4   | O27  | 1.361 (3) | C20  | C21  | 1.514 (5) |
| C5   | C6   | 1.386 (4) | C28  | O27  | 1.431 (4) |
| C7   | C8   | 1.600 (4) | C29  | C30  | 1.394 (4) |
| C7   | C10  | 1.548 (4) | C29  | C34  | 1.396 (4) |
| C7   | C11  | 1.519 (4) | C29  | S22  | 1.762 (3) |
| C8   | C9   | 1.529 (4) | C30  | C31  | 1.379 (4) |
| C8   | N17  | 1.467 (3) | C31  | C32  | 1.397 (4) |
| C9   | C10  | 1.489 (4) | C32  | C33  | 1.394 (4) |
| C9   | C26  | 1.330 (4) | C32  | C35  | 1.504 (4) |
| C10  | O25  | 1.211 (3) | C33  | C34  | 1.382 (4) |
| C11  | C12  | 1.385 (4) | N17  | S22  | 1.636 (2) |
| C11  | C16  | 1.398 (4) | O23  | S22  | 1.431 (2) |
| C12  | C13  | 1.395 (5) | O24  | S22  | 1.435 (2) |

**Table S26 Bond Angles for 220766lt\_auto.**

| Atom | Atom | Atom | Angle/°   | Atom | Atom | Atom | Angle/°   |
|------|------|------|-----------|------|------|------|-----------|
| C2   | C1   | C7   | 122.5 (2) | C11  | C12  | C13  | 122.0 (3) |
| C6   | C1   | C2   | 118.0 (2) | C14  | C13  | C12  | 120.0 (4) |
| C6   | C1   | C7   | 119.5 (2) | C15  | C14  | C13  | 119.2 (3) |
| C3   | C2   | C1   | 120.9 (2) | C14  | C15  | C16  | 121.7 (3) |

**Table S26 Bond Angles for 220766lt\_auto.**

| Atom | Atom | Atom | Angle/°   | Atom | Atom | Atom | Angle/°     |
|------|------|------|-----------|------|------|------|-------------|
| C2   | C3   | C4   | 120.2 (3) | C11  | C16  | C15  | 119.5 (3)   |
| C5   | C4   | C3   | 119.7 (2) | N17  | C18  | C19  | 117.5 (3)   |
| O27  | C4   | C3   | 117.0 (3) | C18  | C19  | C20  | 110.0 (3)   |
| O27  | C4   | C5   | 123.3 (2) | C21  | C20  | C19  | 112.3 (3)   |
| C4   | C5   | C6   | 119.6 (2) | C30  | C29  | C34  | 120.2 (3)   |
| C5   | C6   | C1   | 121.7 (2) | C30  | C29  | S22  | 119.2 (2)   |
| C1   | C7   | C8   | 112.7 (2) | C34  | C29  | S22  | 120.6 (2)   |
| C1   | C7   | C10  | 110.8 (2) | C31  | C30  | C29  | 119.6 (3)   |
| C10  | C7   | C8   | 86.6 (2)  | C30  | C31  | C32  | 121.2 (3)   |
| C11  | C7   | C1   | 112.1 (2) | C31  | C32  | C35  | 120.1 (3)   |
| C11  | C7   | C8   | 116.2 (2) | C33  | C32  | C31  | 118.4 (3)   |
| C11  | C7   | C10  | 116.1 (2) | C33  | C32  | C35  | 121.5 (3)   |
| C9   | C8   | C7   | 89.2 (2)  | C34  | C33  | C32  | 121.3 (3)   |
| N17  | C8   | C7   | 116.0 (2) | C33  | C34  | C29  | 119.3 (3)   |
| N17  | C8   | C9   | 117.9 (2) | C8   | N17  | C18  | 118.2 (2)   |
| C10  | C9   | C8   | 91.4 (2)  | C8   | N17  | S22  | 116.52 (18) |
| C26  | C9   | C8   | 136.0 (3) | C18  | N17  | S22  | 120.03 (18) |
| C26  | C9   | C10  | 132.6 (3) | C4   | O27  | C28  | 117.0 (2)   |
| C9   | C10  | C7   | 92.7 (2)  | N17  | S22  | C29  | 107.67 (12) |
| O25  | C10  | C7   | 133.2 (3) | O23  | S22  | C29  | 107.51 (12) |
| O25  | C10  | C9   | 134.1 (3) | O23  | S22  | N17  | 107.48 (11) |
| C12  | C11  | C7   | 120.1 (3) | O23  | S22  | O24  | 119.75 (12) |
| C12  | C11  | C16  | 117.6 (3) | O24  | S22  | C29  | 107.46 (13) |
| C16  | C11  | C7   | 122.3 (3) | O24  | S22  | N17  | 106.46 (11) |

**Table S27 Torsion Angles for 220766lt\_auto.**

| <b>A</b> | <b>B</b> | <b>C</b> | <b>D</b> | <b>Angle/°</b> | <b>A</b> | <b>B</b> | <b>C</b> | <b>D</b> | <b>Angle/°</b> |
|----------|----------|----------|----------|----------------|----------|----------|----------|----------|----------------|
| C1       | C2       | C3       | C4       | -0.6 (4)       | C10      | C7       | C8       | N17      | -118.9 (2)     |
| C1       | C7       | C8       | C9       | -109.1 (2)     | C10      | C7       | C11      | C12      | 175.6 (2)      |
| C1       | C7       | C8       | N17      | 130.0 (2)      | C10      | C7       | C11      | C16      | -3.6 (4)       |
| C1       | C7       | C10      | C9       | 110.8 (2)      | C11      | C7       | C8       | C9       | 119.6 (2)      |
| C1       | C7       | C10      | O25      | -68.6 (4)      | C11      | C7       | C8       | N17      | -1.3 (3)       |
| C1       | C7       | C11      | C12      | -55.7 (3)      | C11      | C7       | C10      | C9       | -119.8 (2)     |
| C1       | C7       | C11      | C16      | 125.2 (3)      | C11      | C7       | C10      | O25      | 60.8 (4)       |
| C2       | C1       | C6       | C5       | 1.9 (4)        | C11      | C12      | C13      | C14      | 0.6 (5)        |
| C2       | C1       | C7       | C8       | -40.1 (3)      | C12      | C11      | C16      | C15      | 1.9 (4)        |
| C2       | C1       | C7       | C10      | -135.3 (3)     | C12      | C13      | C14      | C15      | 2.1 (5)        |
| C2       | C1       | C7       | C11      | 93.2 (3)       | C13      | C14      | C15      | C16      | -2.7 (6)       |
| C2       | C3       | C4       | C5       | 2.0 (4)        | C14      | C15      | C16      | C11      | 0.7 (5)        |
| C2       | C3       | C4       | O27      | -176.0 (2)     | C16      | C11      | C12      | C13      | -2.6 (4)       |
| C3       | C4       | C5       | C6       | -1.4 (4)       | C18      | C19      | C20      | C21      | 171.9 (3)      |
| C3       | C4       | O27      | C28      | 176.4 (3)      | C18      | N17      | S22      | C29      | 76.4 (2)       |
| C4       | C5       | C6       | C1       | -0.6 (4)       | C18      | N17      | S22      | O23      | -39.1 (3)      |
| C5       | C4       | O27      | C28      | -1.5 (4)       | C18      | N17      | S22      | O24      | -168.6 (2)     |
| C6       | C1       | C2       | C3       | -1.4 (4)       | C19      | C18      | N17      | C8       | -142.8 (3)     |
| C6       | C1       | C7       | C8       | 141.4 (2)      | C19      | C18      | N17      | S22      | 63.7 (3)       |
| C6       | C1       | C7       | C10      | 46.3 (3)       | C26      | C9       | C10      | C7       | -177.4 (3)     |
| C6       | C1       | C7       | C11      | -85.3 (3)      | C26      | C9       | C10      | O25      | 2.0 (6)        |
| C7       | C1       | C2       | C3       | -179.9 (2)     | C29      | C30      | C31      | C32      | 0.8 (4)        |
| C7       | C1       | C6       | C5       | -179.5 (2)     | C30      | C29      | C34      | C33      | -0.4 (4)       |

**Table S27 Torsion Angles for 220766lt\_auto.**

| A   | B   | C   | D   | Angle/°     | A   | B   | C   | D   | Angle/°    |
|-----|-----|-----|-----|-------------|-----|-----|-----|-----|------------|
| C7  | C8  | C9  | C10 | -2.2 (2)    | C30 | C29 | S22 | N17 | -82.0 (2)  |
| C7  | C8  | C9  | C26 | 177.5 (4)   | C30 | C29 | S22 | O23 | 33.5 (2)   |
| C7  | C8  | N17 | C18 | 82.9 (3)    | C30 | C29 | S22 | O24 | 163.6 (2)  |
| C7  | C8  | N17 | S22 | -122.6 (2)  | C30 | C31 | C32 | C33 | -0.3 (4)   |
| C7  | C11 | C12 | C13 | 178.3 (3)   | C30 | C31 | C32 | C35 | 178.2 (3)  |
| C7  | C11 | C16 | C15 | -179.0 (3)  | C31 | C32 | C33 | C34 | -0.5 (4)   |
| C8  | C7  | C10 | C9  | -2.1 (2)    | C32 | C33 | C34 | C29 | 0.9 (4)    |
| C8  | C7  | C10 | O25 | 178.4 (4)   | C34 | C29 | C30 | C31 | -0.4 (4)   |
| C8  | C7  | C11 | C12 | 75.9 (3)    | C34 | C29 | S22 | N17 | 98.7 (2)   |
| C8  | C7  | C11 | C16 | -103.2 (3)  | C34 | C29 | S22 | O23 | -145.8 (2) |
| C8  | C9  | C10 | C7  | 2.2 (2)     | C34 | C29 | S22 | O24 | -15.6 (3)  |
| C8  | C9  | C10 | O25 | -178.3 (4)  | C35 | C32 | C33 | C34 | -179.0 (3) |
| C8  | N17 | S22 | C29 | -77.5 (2)   | N17 | C8  | C9  | C10 | 117.1 (2)  |
| C8  | N17 | S22 | O23 | 166.91 (19) | N17 | C8  | C9  | C26 | -63.2 (5)  |
| C8  | N17 | S22 | O24 | 37.4 (2)    | N17 | C18 | C19 | C20 | 165.8 (3)  |
| C9  | C8  | N17 | C18 | -21.1 (4)   | O27 | C4  | C5  | C6  | 176.4 (3)  |
| C9  | C8  | N17 | S22 | 133.4 (2)   | S22 | C29 | C30 | C31 | -179.7 (2) |
| C10 | C7  | C8  | C9  | 2.1 (2)     | S22 | C29 | C34 | C33 | 178.8 (2)  |

**Table S28 Hydrogen Atom Coordinates ( $\text{\AA}\times 10^4$ ) and Isotropic Displacement Parameters ( $\text{\AA}^2\times 10^3$ ) for 220766lt\_auto.**

| Atom | <i>x</i> | <i>y</i> | <i>z</i> | U(eq) |
|------|----------|----------|----------|-------|
| H2   | 2529.38  | 7748.91  | 3412.3   | 35    |
| H3   | 491.44   | 8450.61  | 4469.82  | 38    |

**Table S28 Hydrogen Atom Coordinates ( $\text{\AA}\times 10^4$ ) and Isotropic Displacement Parameters ( $\text{\AA}^2\times 10^3$ ) for 220766lt\_auto.**

| Atom | x        | y        | z        | U(eq) |
|------|----------|----------|----------|-------|
| H5   | 4457.37  | 8873.96  | 5850.87  | 40    |
| H6   | 6487.92  | 8198.97  | 4772.32  | 36    |
| H8   | 4406.18  | 6174.74  | 3397.95  | 35    |
| H12  | 4283.4   | 9085.92  | 1934.7   | 49    |
| H13  | 5102.4   | 10644.65 | 591.19   | 62    |
| H14  | 8051.01  | 10924.46 | 255.71   | 70    |
| H15  | 10153.5  | 9589.18  | 1200.19  | 66    |
| H16  | 9365.49  | 8023.37  | 2583.72  | 58    |
| H18A | 7526.12  | 5296.22  | 1607.14  | 47    |
| H18B | 8356.48  | 6152.72  | 1983.91  | 47    |
| H19A | 7551.2   | 7660.79  | 441.68   | 57    |
| H19B | 7202.78  | 6629.96  | 80.14    | 57    |
| H20A | 10510.44 | 6859.82  | 656.9    | 66    |
| H20B | 10201.27 | 5713.97  | 454.28   | 66    |
| H21A | 9818.55  | 6753.78  | -1205.95 | 88    |
| H21B | 11613.39 | 7024.72  | -942.17  | 88    |
| H21C | 9870.83  | 7957.22  | -1027.31 | 88    |
| H28A | 2317.52  | 9926.66  | 6434.2   | 73    |
| H28B | 2297.24  | 8601.73  | 7127.23  | 73    |
| H28C | 573.65   | 9538.78  | 7097.24  | 73    |
| H30  | 5330.16  | 4465.49  | 915.94   | 39    |
| H31  | 4993.05  | 2509.45  | 1432.89  | 42    |
| H33  | 1511.44  | 2944.51  | 3653.22  | 46    |

**Table S28 Hydrogen Atom Coordinates ( $\text{\AA}\times 10^4$ ) and Isotropic Displacement Parameters ( $\text{\AA}^2\times 10^3$ ) for 220766lt\_auto.**

| Atom | x       | y       | z       | U(eq) |
|------|---------|---------|---------|-------|
| H34  | 1881.96 | 4896.52 | 3170.84 | 43    |
| H35A | 2283.38 | 1047.04 | 3534.36 | 69    |
| H35B | 4123.42 | 777.61  | 2959.33 | 69    |
| H35C | 2346.18 | 1148.35 | 2394.11 | 69    |

### Experimental

Single crystals of  $\text{C}_{29}\text{H}_{29}\text{NO}_4\text{S}$  [220766lt\_auto] were [ ]. A suitable crystal was selected and [ ] on a **XtaLAB Synergy R, DW system, HyPix-Arc 150** diffractometer. The crystal was kept at 99.99(10) K during data collection. Using Olex2 [1], the structure was solved with the SHELXT [2] structure solution program using Intrinsic Phasing and refined with the SHELXL [3] refinement package using Least Squares minimisation.

1. Dolomanov, O.V., Bourhis, L.J., Gildea, R.J., Howard, J.A.K. & Puschmann, H. (2009), *J. Appl. Cryst.* 42, 339-341.
2. Sheldrick, G.M. (2015). *Acta Cryst.* A71, 3-8.
3. Sheldrick, G.M. (2015). *Acta Cryst.* C71, 3-8.

### Crystal structure determination of [220766lt\_auto]

**Crystal Data** for  $\text{C}_{29}\text{H}_{29}\text{NO}_4\text{S}$  ( $M = 487.59$  g/mol): triclinic, space group P-1 (no. 2),  $a = 7.73568(18)$   $\text{\AA}$ ,  $b = 12.3470(3)$   $\text{\AA}$ ,  $c = 14.4133(3)$   $\text{\AA}$ ,  $\alpha = 69.991(2)^\circ$ ,  $\beta = 83.0268(19)^\circ$ ,  $\gamma = 79.978(2)^\circ$ ,  $V = 1270.97(5)$   $\text{\AA}^3$ ,  $Z = 2$ ,  $T = 99.99(10)$  K,  $\mu(\text{Cu K}\alpha) = 1.414$   $\text{mm}^{-1}$ ,  $D_{\text{calc}} = 1.274$   $\text{g/cm}^3$ , 13857 reflections measured ( $6.542^\circ \leq 2\theta \leq 134.038^\circ$ ), 4513 unique ( $R_{\text{int}} = 0.0206$ ,  $R_{\text{sigma}} = 0.0239$ ) which were used in all calculations. The final  $R_1$  was 0.0593 ( $I > 2\sigma(I)$ ) and  $wR_2$  was 0.1686 (all data).

### Refinement model description

Number of restraints - 0, number of constraints - unknown.

#### Details:

1. Fixed Uiso  
At 1.2 times of:  
All C(H) groups, All C(H,H) groups  
At 1.5 times of:  
All C(H,H,H) groups
- 2.a Ternary CH refined with riding coordinates:  
C8(H8)
- 2.b Secondary CH2 refined with riding coordinates:  
C18(H18A,H18B), C19(H19A,H19B), C20(H20A,H20B)
- 2.c Aromatic/amide H refined with riding coordinates:  
C2(H2), C3(H3), C5(H5), C6(H6), C12(H12), C13(H13), C14(H14), C15(H15),  
C16(H16), C30(H30), C31(H31), C33(H33), C34(H34)
- 2.d Idealised Me refined as rotating group:  
C21(H21A,H21B,H21C), C28(H28A,H28B,H28C), C35(H35A,H35B,H35C)

## 8. $^1\text{H}$ , $^{13}\text{C}$ spectra and NOE of key compounds:

Current Data Parameters  
NAME AK-02-08  
EXPNO 2  
PROCNO 1

F2 - Acquisition Parameters  
Date\_ 20220728  
Time 10.36  
INSTRUM spect  
PROBHD 5 mm DUL 13C-1  
PULPROG zg30  
TD 32768  
SOLVENT CDCl3  
NS 23  
DS 0  
SWH 6410.256 Hz  
FIDRES 0.195625 Hz  
AQ 2.5559039 sec  
RG 90.5  
DW 78.000 usec  
DE 6.00 usec  
TE 300.0 K  
D1 2.00000000 sec  
TD0 1

==== CHANNEL f1 =====  
NUC1  $^1\text{H}$   
P1 10.00 usec  
PL1 -2.40 dB  
SFO1 400.1528010 MHz

F2 - Processing parameters  
SI 16384  
SF 400.1500168 MHz  
WDW EM  
SSB 0  
LB 0 Hz  
GB 0  
PC 1.00

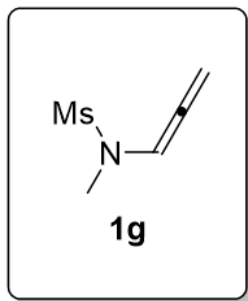

6.703  
6.688  
6.676  
6.673

5.377  
5.362

2.841  
2.808

$^1\text{H}$  NMR: 400 MHz  
Solvent :  $\text{CDCl}_3$

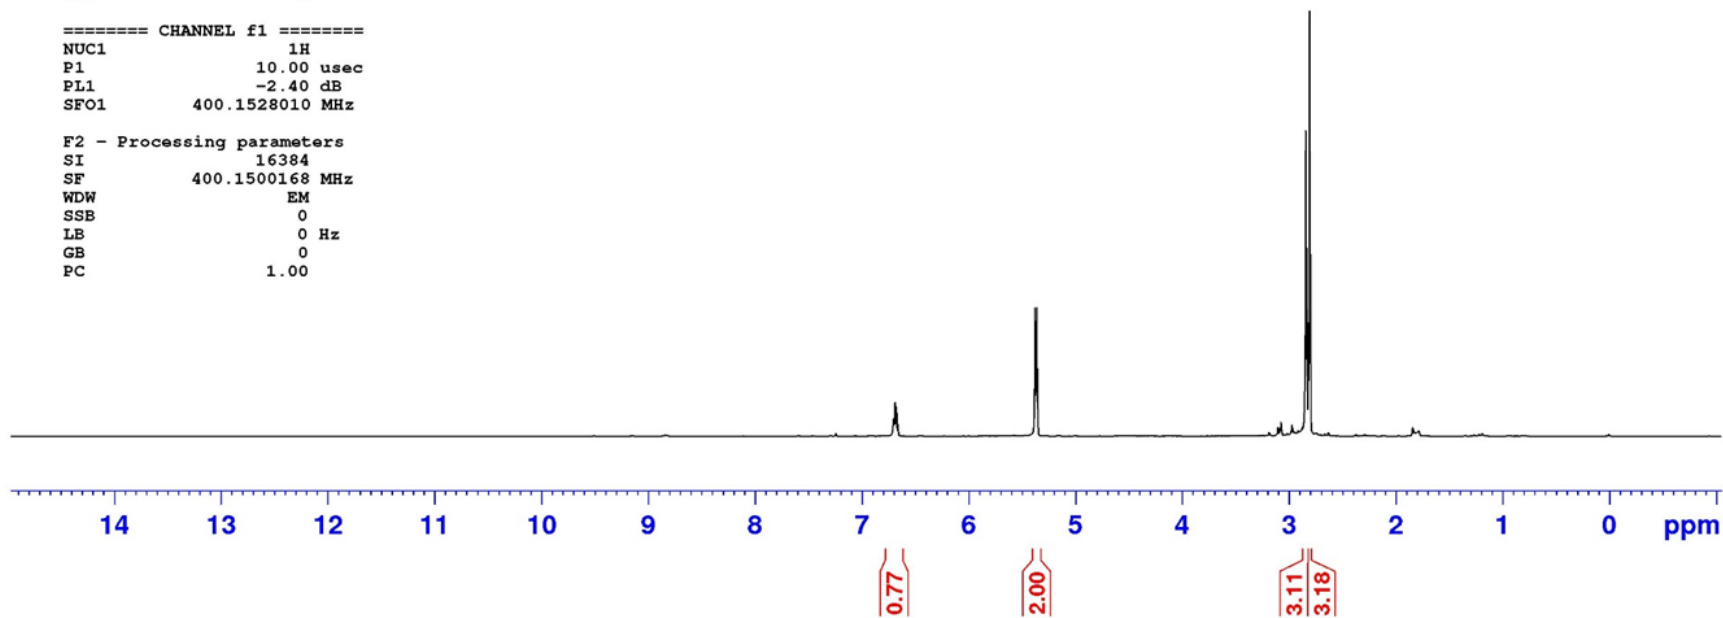

200.76  
 Current Data Parameters  
 NAME AK-02-08  
 EXPNO 4  
 PROCNO 1  
 F2 - Acquisition Parameters  
 Date\_ 20220815  
 Time 23.20  
 INSTRUM spect  
 PROBHD 5 mm DUL 13C-1  
 PULPROG zgpg30  
 TD 65536  
 SOLVENT CDCl3  
 NS 21  
 DS 0  
 SWH 22727.273 Hz  
 FIDRES 0.346791 Hz  
 AQ 1.4417920 sec  
 RG 2050  
 DW 22.000 usec  
 DE 6.00 usec  
 TE 300.0 K  
 D1 2.00000000 sec  
 d11 0.03000000 sec  
 DELTA 1.89999998 sec  
 TDO 1  
 ===== CHANNEL f1 =====  
 NUC1 13C 13C  
 P1 9.70 usec  
 PL1 -0.50 dB  
 SFO1 100.6288660 MHz  
 ===== CHANNEL f2 =====  
 CPDPRG[2] waltz16  
 NUC2 1H 1H  
 PCPD2 90.00 usec  
 PL2 -2.40 dB  
 PL12 15.10 dB  
 PL13 18.10 dB  
 SFO2 400.1516010 MHz  
 F2 - Processing parameters  
 SI 32768  
 SF 100.6178183 MHz  
 WDW EM  
 SSB 0  
 LB 3.00 Hz  
 GB 0  
 PC 1.00

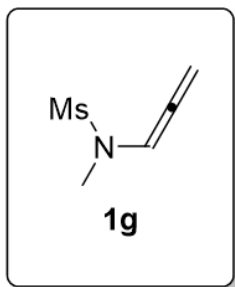

101.00  
 87.84  
 77.32  
 77.00  
 76.68  
 35.51  
 33.07

<sup>13</sup>C NMR: 100 MHz  
 Solvent : CDCl<sub>3</sub>

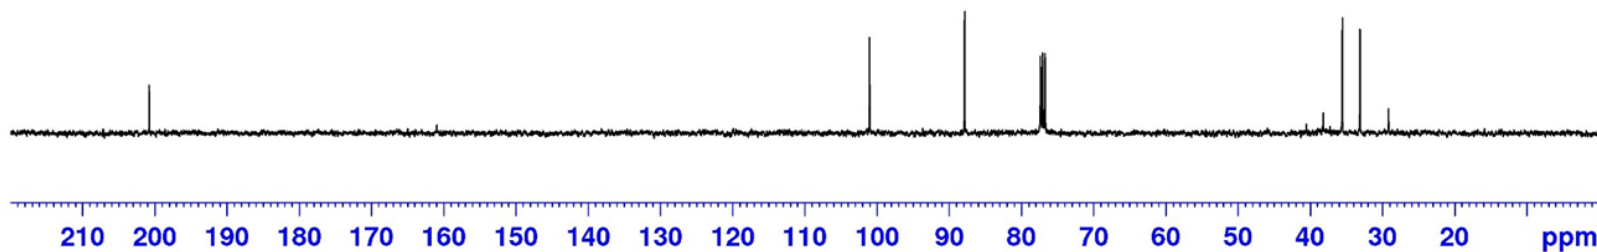



<sup>1</sup>H NMR: 400 MHz  
Solvent : CDCl<sub>3</sub>

7.400  
7.394  
7.389  
7.378  
7.372  
7.257  
7.251  
7.246  
7.241  
7.235  
6.922  
6.906  
6.890

5.153  
5.137

2.982

1.300

Current Data Parameters  
NAME AK-02-11  
EXPNO 1  
PROCNO 1  
  
F2 - Acquisition Parameters  
Date\_ 20220801  
Time 22.25  
INSTRUM spect  
PROBHD 5 mm DUL 13C-1  
PULPROG zg30  
TD 32768  
SOLVENT CDCl3  
NS 8  
DS 0  
SWH 6410.256 Hz  
FIDRES 0.195625 Hz  
AQ 2.5559039 sec  
RG 181  
DW 78.000 usec  
DE 6.00 usec  
TE 300.0 K  
D1 2.00000000 sec  
TD0 1

==== CHANNEL f1 =====  
NUC1 1H  
P1 10.00 usec  
PL1 -2.40 dB  
SFO1 400.1528010 MHz

F2 - Processing parameters  
SI 16384  
SF 400.1500168 MHz  
WDW EM  
SSB 0  
LB 0 Hz  
GB 0  
PC 1.00

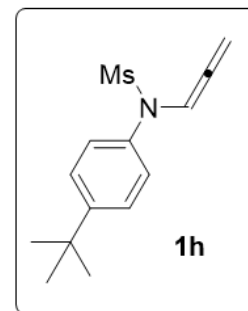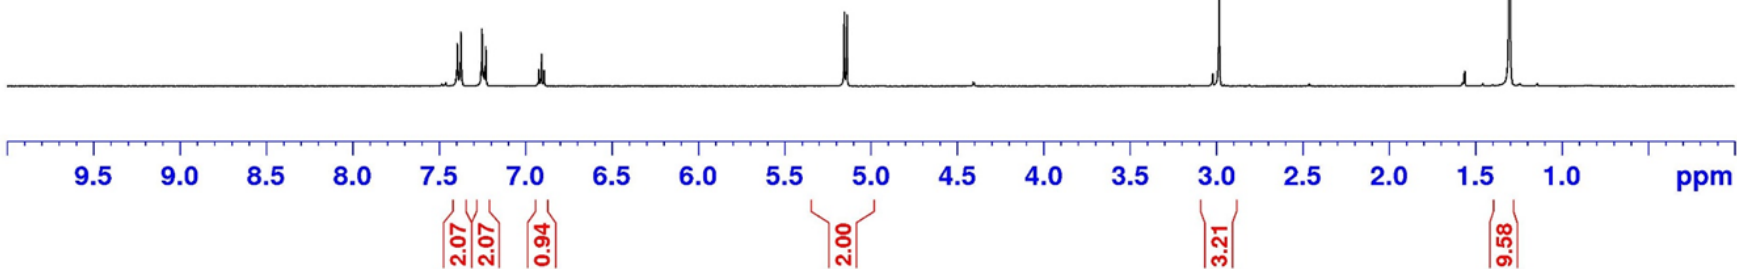

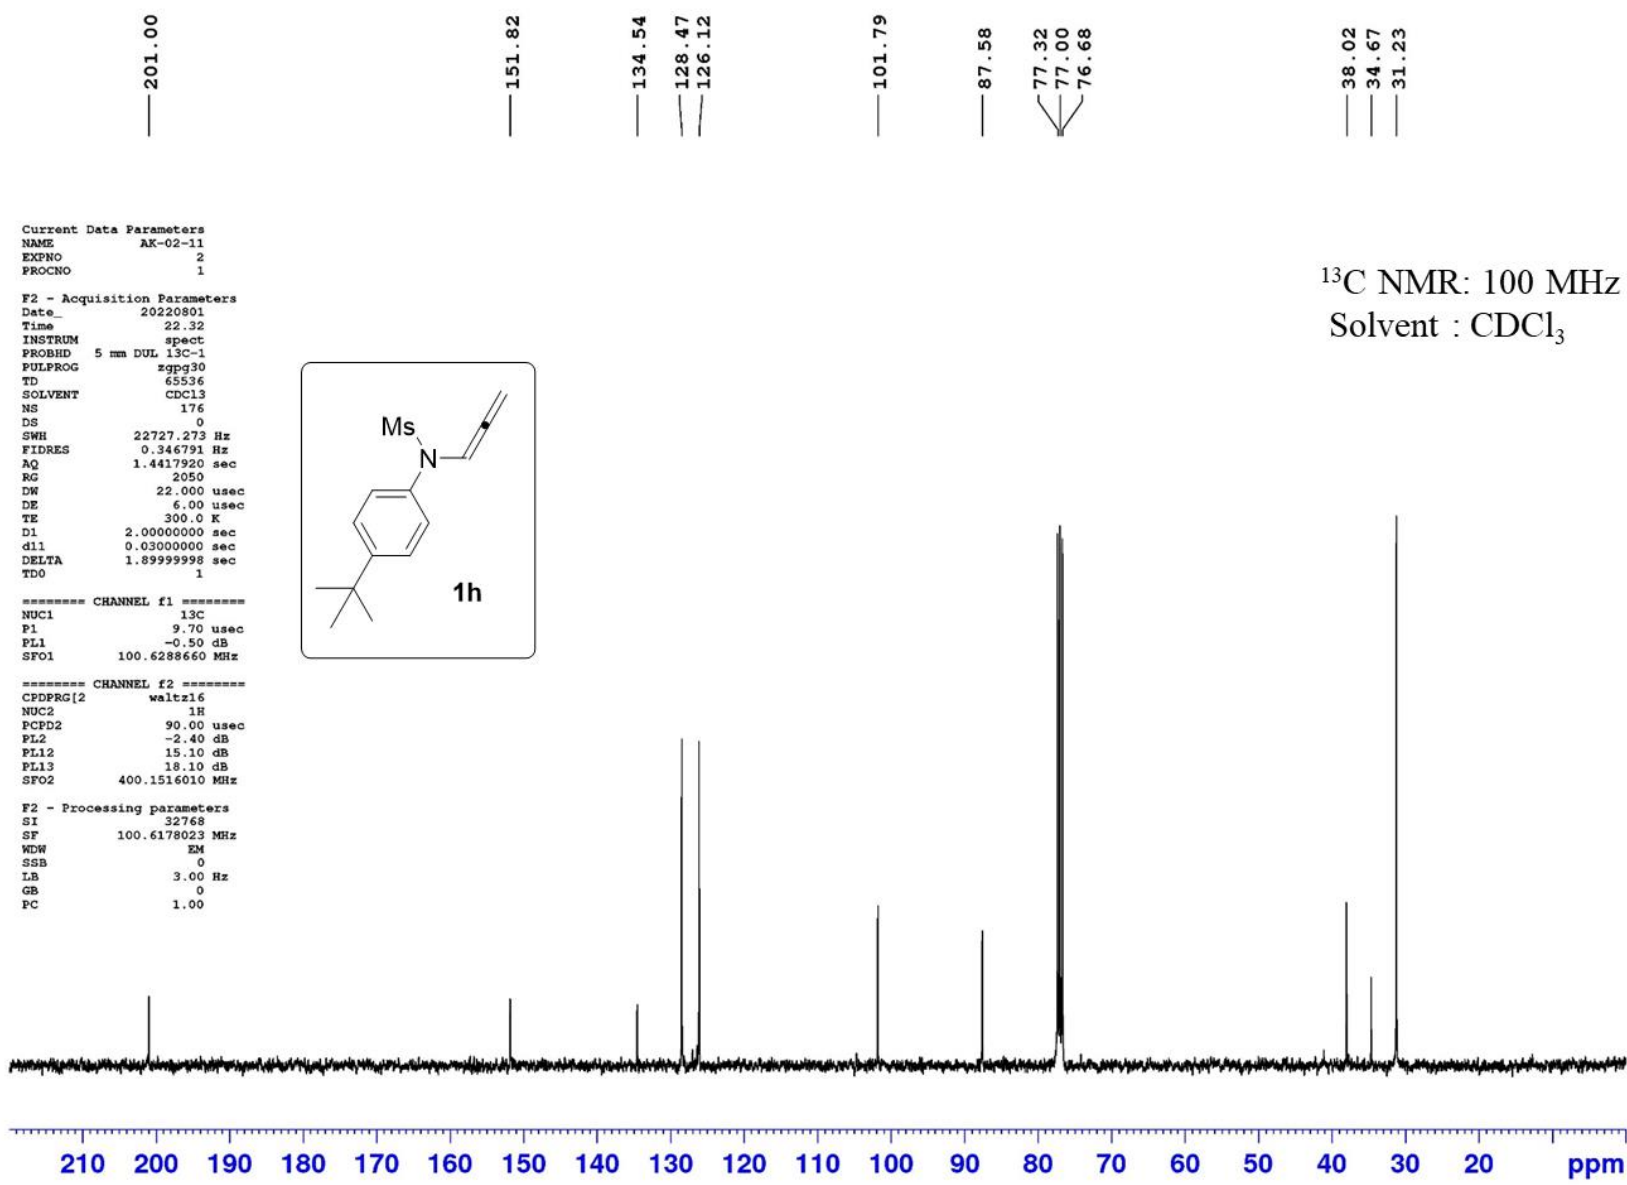

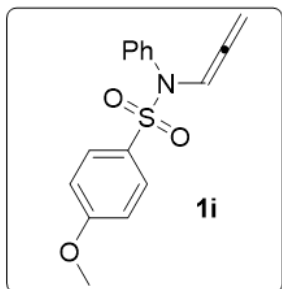

7.568  
7.555  
7.274  
7.272  
7.266  
7.263  
7.257  
7.252  
7.246  
7.243  
7.239  
7.077  
7.068  
7.059  
6.986  
6.984  
6.975  
6.972  
6.913  
6.900

4.994  
4.985

3.835

1.634

<sup>1</sup>H NMR: 700 MHz

Solvent : CDCl<sub>3</sub>

Current Data Parameters  
NAME AK-02-17-H.fid  
EXPNO 1  
PROCNO 1

F2 - Processing parameters  
SI 65536  
SF 699.7431020 MHz  
WDW EM  
SSB 0  
LB 0.30 Hz  
GB 0  
PC 1.00

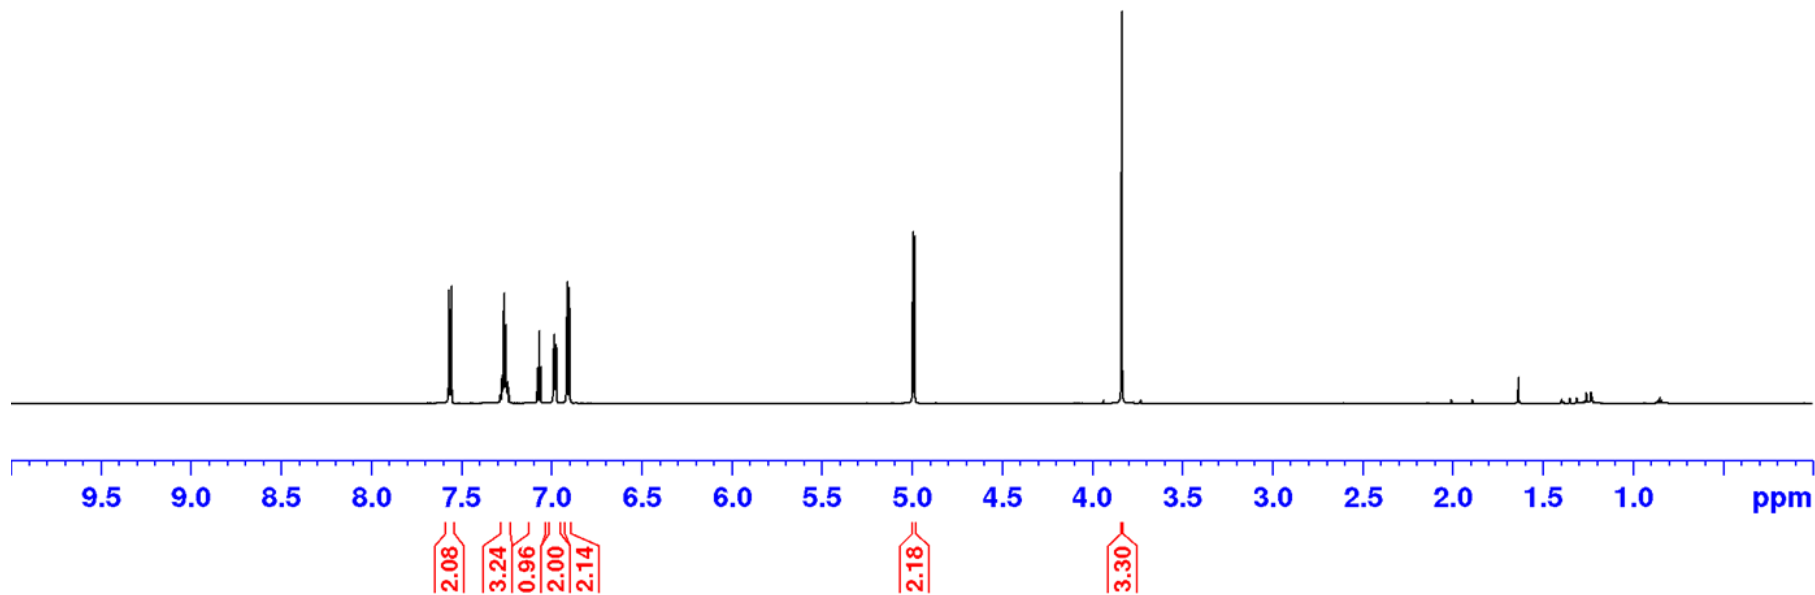

— 201.00  
 — 163.15  
 — 137.20  
 — 129.52  
 — 128.66  
 — 128.55  
 — 113.99  
 — 102.31  
 — 87.36  
 — 77.18  
 — 77.00  
 — 76.82  
 — 55.55

<sup>13</sup>C NMR: 175 MHz

Solvent : CDCl<sub>3</sub>

**AK-02-17**

Current Data Parameters  
 NAME AK-02-17-c.fid  
 EXPNO 1  
 PROCNO 1

F2 - Processing parameters  
 SI 131072  
 SF 175.9505524 MHz  
 WDW EM  
 SSB 0  
 LB 0.30 Hz  
 GB 0  
 PC 1.00

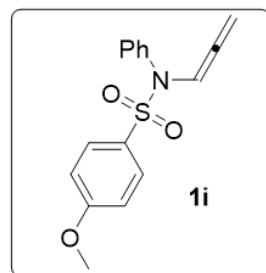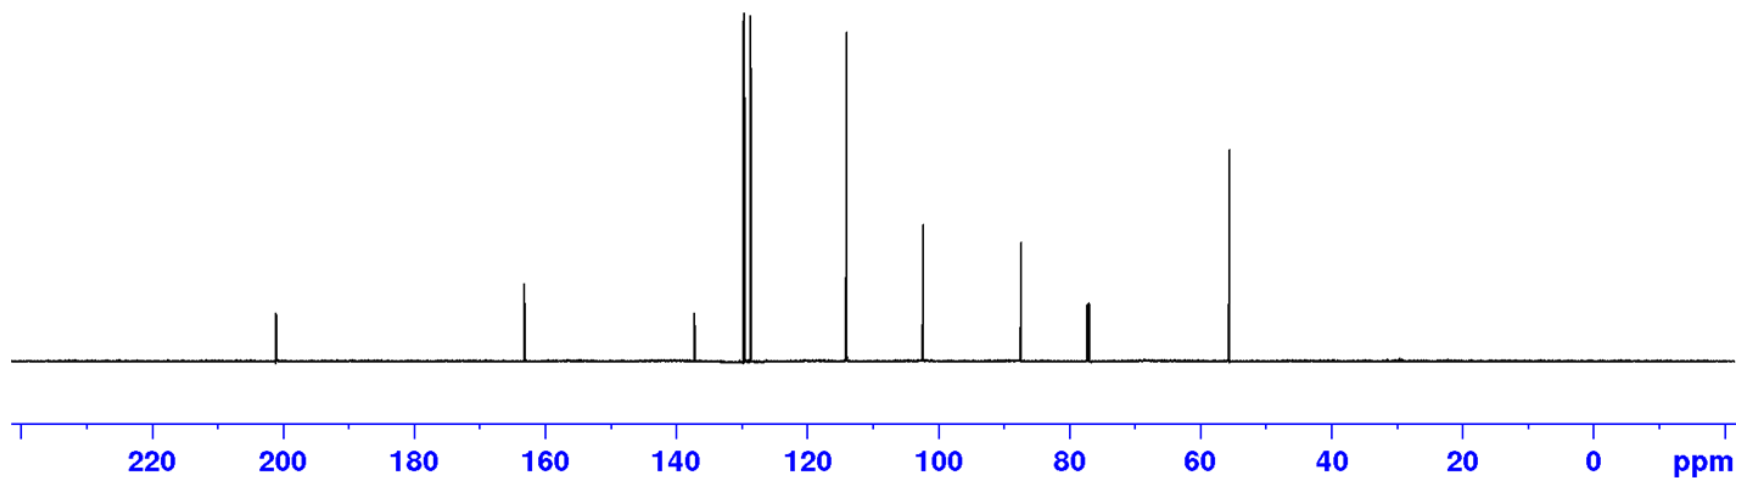

<sup>1</sup>H NMR: 700 MHz  
Solvent : CDCl<sub>3</sub>

7.626  
7.614  
7.271  
7.259  
7.240  
7.219  
7.207  
6.870  
6.858

6.280

5.857

5.447

4.170  
4.158  
4.150  
4.137  
3.814  
3.802  
3.790  
3.768  
3.746  
3.305  
3.293  
3.281  
3.269

2.279  
2.271  
2.267  
2.251

1.550

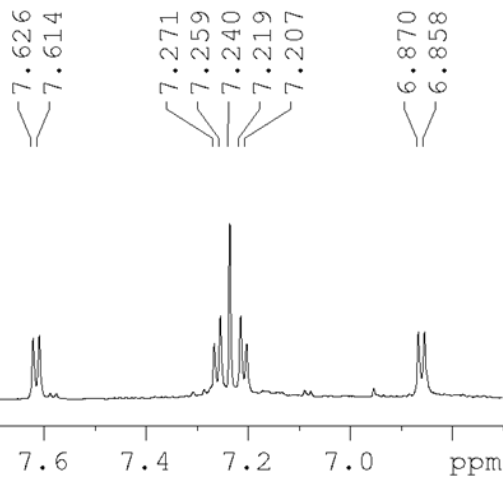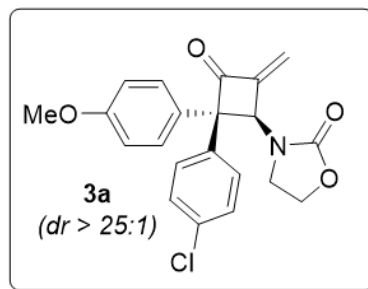

Current Data Parameters  
NAME SAM-03-155-H.fid  
EXPNO 1  
PROCNO 1

F2 - Processing parameters  
SI 65536  
SF 699.7431022 MHz  
WDW EM  
SSB 0  
LB 0.30 Hz  
GB 0  
PC 1.00

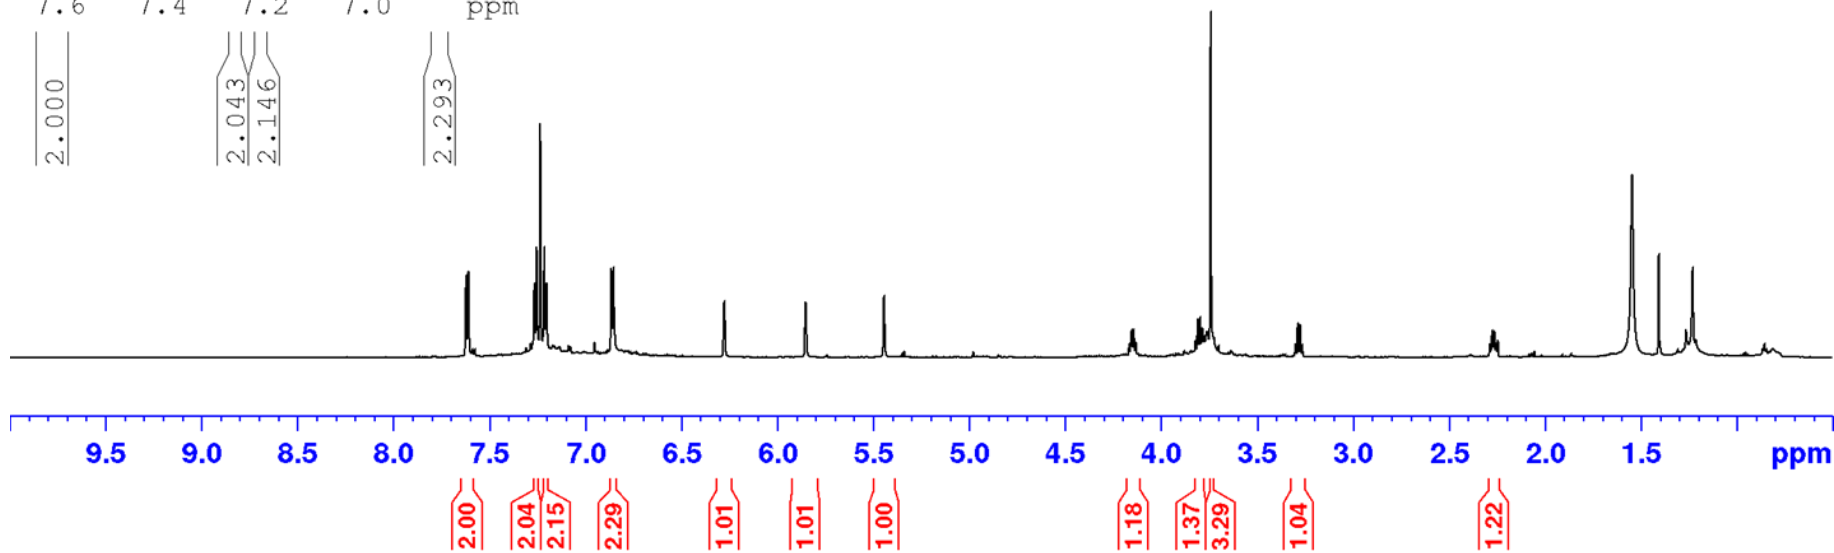



<sup>1</sup>H NMR: 700 MHz  
Solvent : CDCl<sub>3</sub>

7.726  
7.716  
7.661  
7.648  
7.334  
7.323  
7.312  
7.291  
7.280  
7.269  
7.249  
7.239  
7.219  
7.208  
7.202  
7.191  
7.174  
7.162  
6.869  
6.856  
6.820  
6.808  
6.260  
5.894  
5.865  
5.411  
4.141  
4.132  
4.128  
4.120  
4.115  
4.108  
4.100  
4.096  
4.088  
4.083  
4.075  
3.804  
3.792  
3.780  
3.768  
3.741  
3.729  
3.710  
3.698  
3.685  
3.673  
3.263  
3.250  
3.245  
3.238  
3.233  
3.221  
3.209  
2.243  
2.234  
2.230  
2.222  
2.218  
2.209  
2.152  
2.144  
2.140  
2.132  
2.127  
2.119  
1.573

7.726  
7.716  
7.661  
7.648  
7.323  
7.280  
7.269  
7.249  
7.239  
7.208  
7.174  
7.162  
6.869  
6.856  
6.820  
6.808

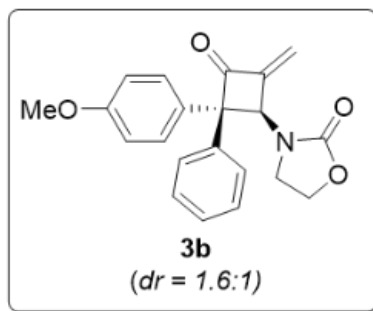

Current Data Parameters  
NAME SAM-03-123-H.fid  
EXPNO 1  
PROCNO 1

F2 - Processing parameters  
SI 65536  
SF 699.7431037 MHz  
WDW EM  
SSB 0  
LB 0.30 Hz  
GB 0  
PC 1.00

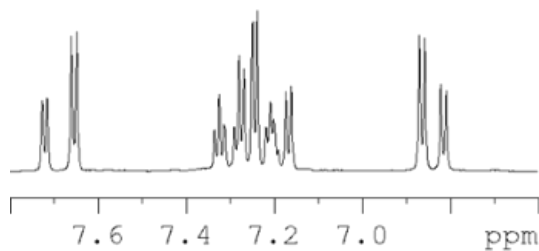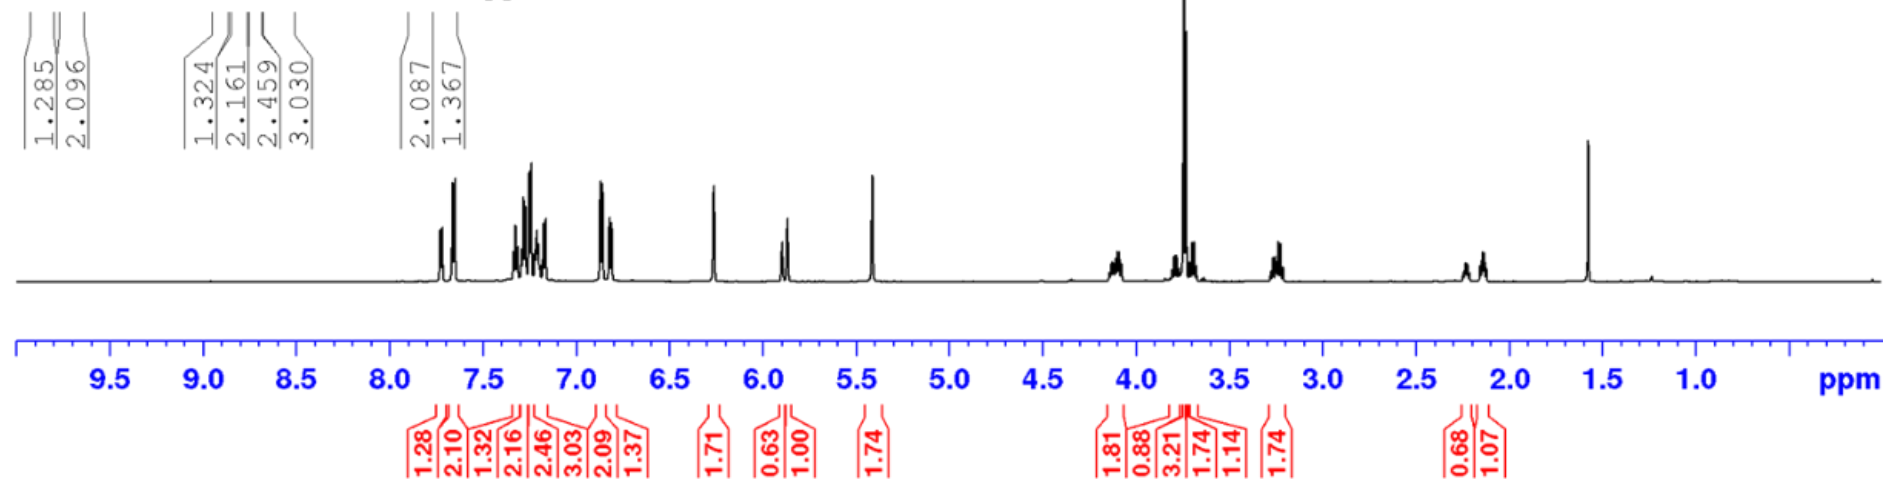

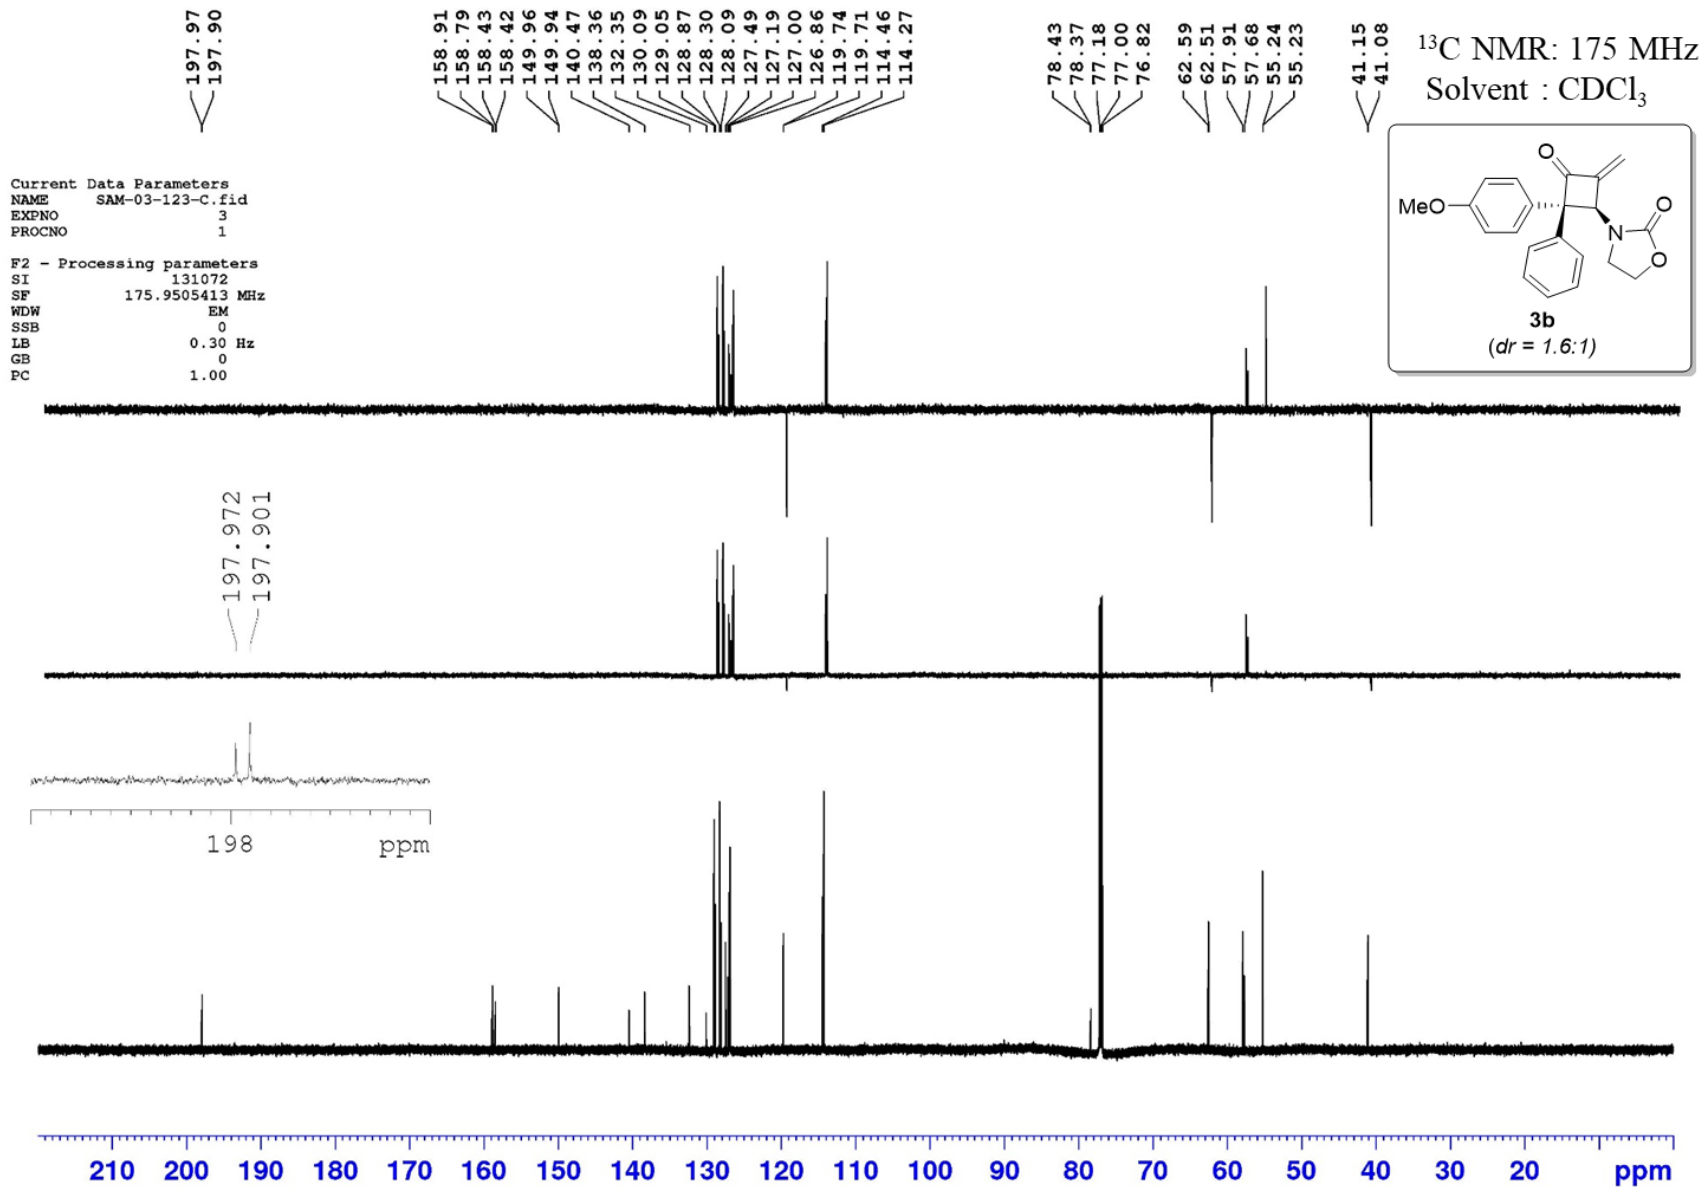



<sup>1</sup>H NMR: 700 MHz  
Solvent : CDCl<sub>3</sub>

7.641  
7.628  
7.597  
7.585  
7.240  
7.170  
7.157  
7.133  
7.124  
7.112  
7.085  
7.074  
6.858  
6.845  
6.813  
6.801  
6.252  
6.250  
6.247  
6.246  
5.865  
5.845  
5.401  
4.133  
4.125  
4.118  
4.110  
4.105  
4.097  
4.093  
4.085  
3.781  
3.769  
3.757  
3.747  
3.736  
3.725  
3.711  
3.268  
3.256  
3.250  
3.243  
3.237  
3.231  
3.225  
3.213  
2.269  
2.258  
2.216  
2.208  
2.203  
2.195  
2.191  
2.146  
1.605

7.641  
7.628  
7.597  
7.585  
7.240  
7.170  
7.157  
7.124  
7.112  
7.085  
7.074  
6.858  
6.845  
6.813  
6.801

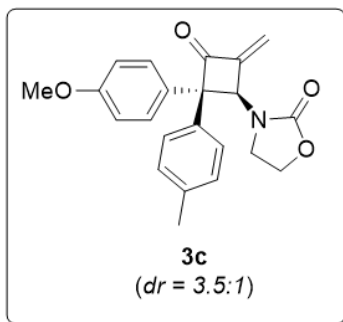

Current Data Parameters  
NAME SAM-03-136-H.fid  
EXPNO 1  
PROCNO 1

F2 - Processing parameters  
SI 65536  
SF 699.7431011 MHz  
WDW EM  
SSB 0  
LB 0.30 Hz  
GB 0  
PC 1.00

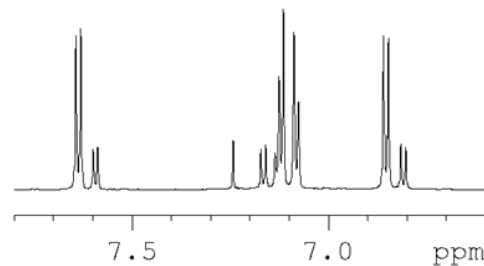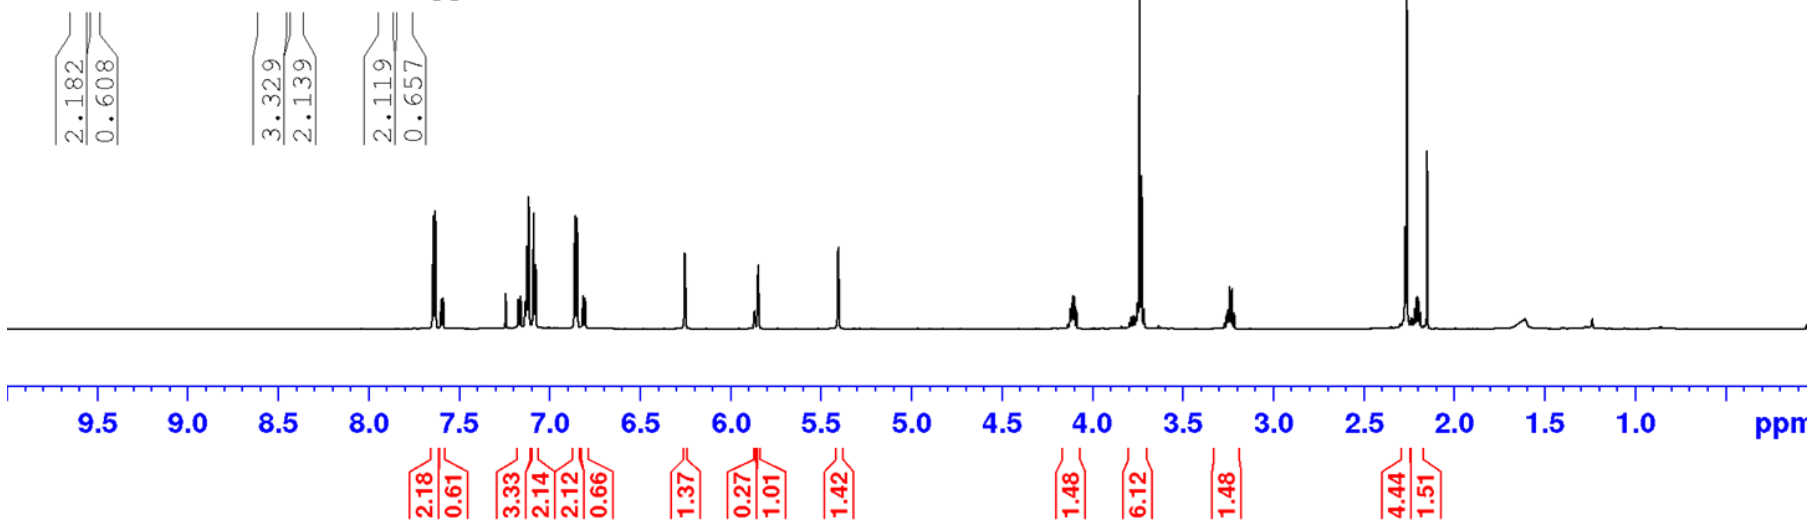

198.15

158.84  
158.71  
158.45  
158.43  
150.03  
137.23  
136.93  
135.35  
132.61  
130.29  
129.72  
129.55  
128.21  
128.02  
126.86  
126.70  
119.67  
119.57  
114.43  
114.23

78.14  
78.09  
77.19  
77.01  
76.82

62.58  
62.54  
57.82  
57.70  
55.23  
55.22

41.15  
41.10

21.01  
20.97

Current Data Parameters  
NAME SAM-03-136-C.fid  
EXPNO 3  
PROCNO 1

F2 - Processing parameters  
SI 131072  
SF 175.9505418 MHz  
WDW EM  
SSB 0  
LB 0.30 Hz  
GB 0  
PC 1.00

<sup>13</sup>C NMR: 175 MHz  
Solvent : CDCl<sub>3</sub>

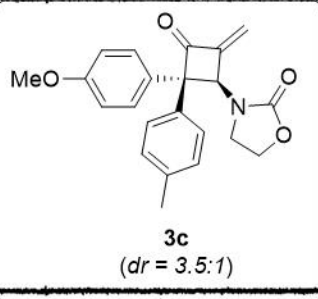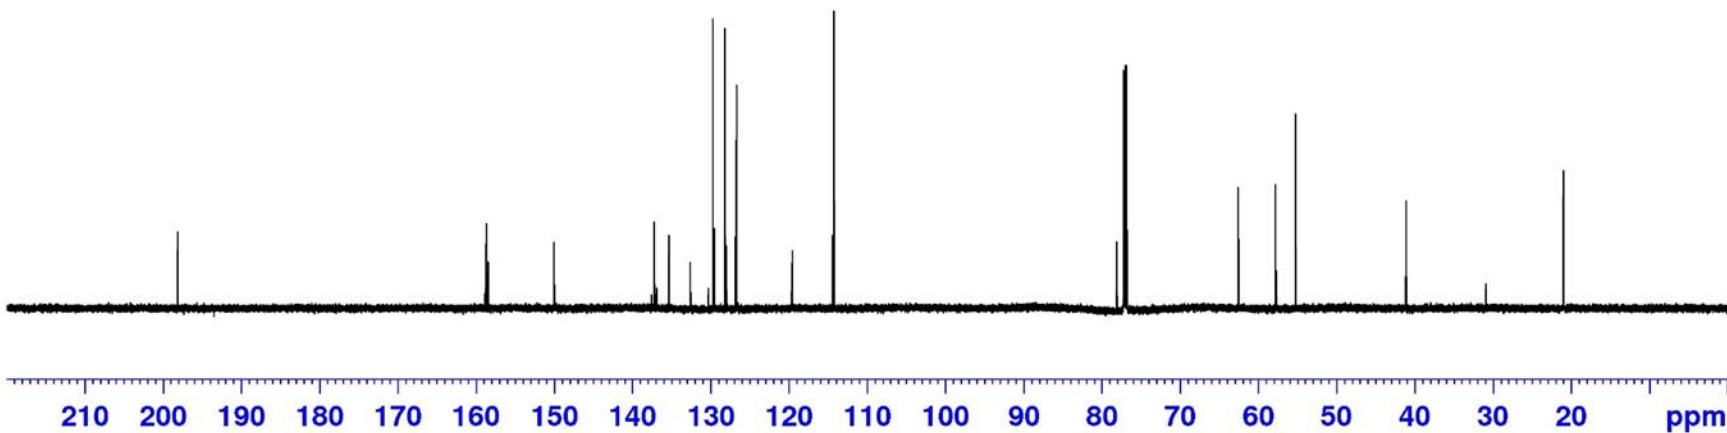

<sup>1</sup>H NMR: 700 MHz  
Solvent : CDCl<sub>3</sub>

7.621  
7.609  
7.422  
7.410  
7.240  
7.158  
7.146  
6.867  
6.855

6.280

5.854

5.449

4.171  
4.159  
4.151  
4.139  
3.829  
3.817  
3.805  
3.793  
3.744  
3.305  
3.293  
3.281  
3.269

2.296  
2.284  
2.276  
2.264

1.564

7.621  
7.609  
7.422  
7.410  
7.240  
7.158  
7.146  
6.867  
6.855

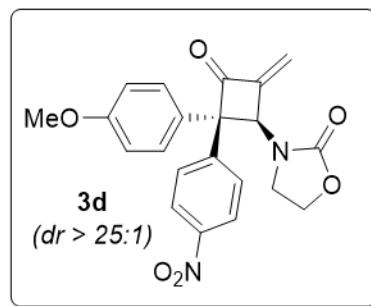

Current Data Parameters  
NAME SAM-03-135-H.fid  
EXPNO 1  
PROCNO 1

F2 - Processing parameters  
SI 65536  
SF 699.7431058 MHz  
WDW EM  
SSB 0  
LB 0.30 Hz  
GB 0  
PC 1.00

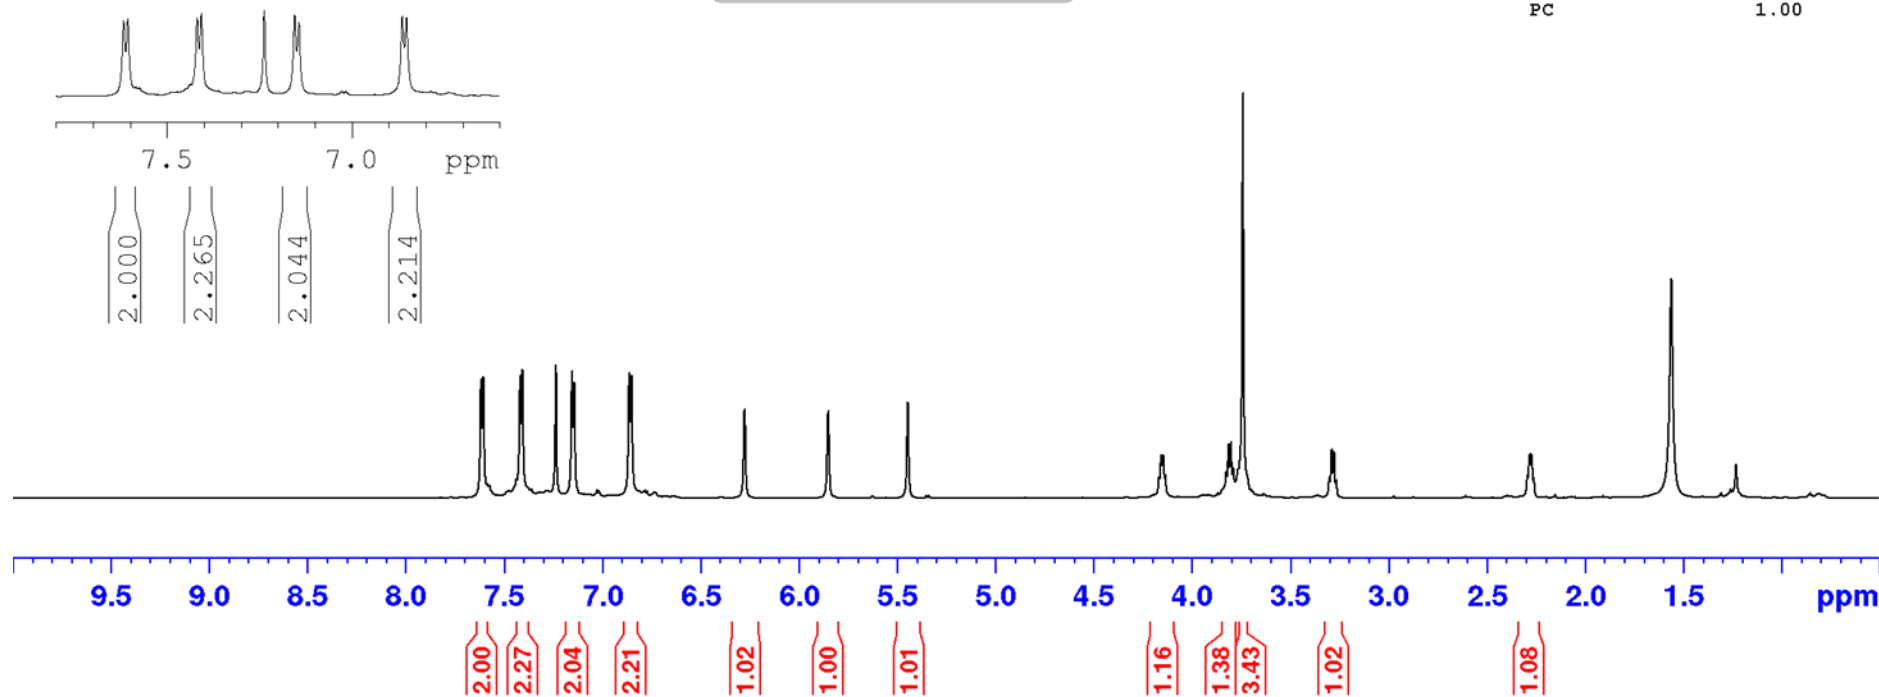

S75

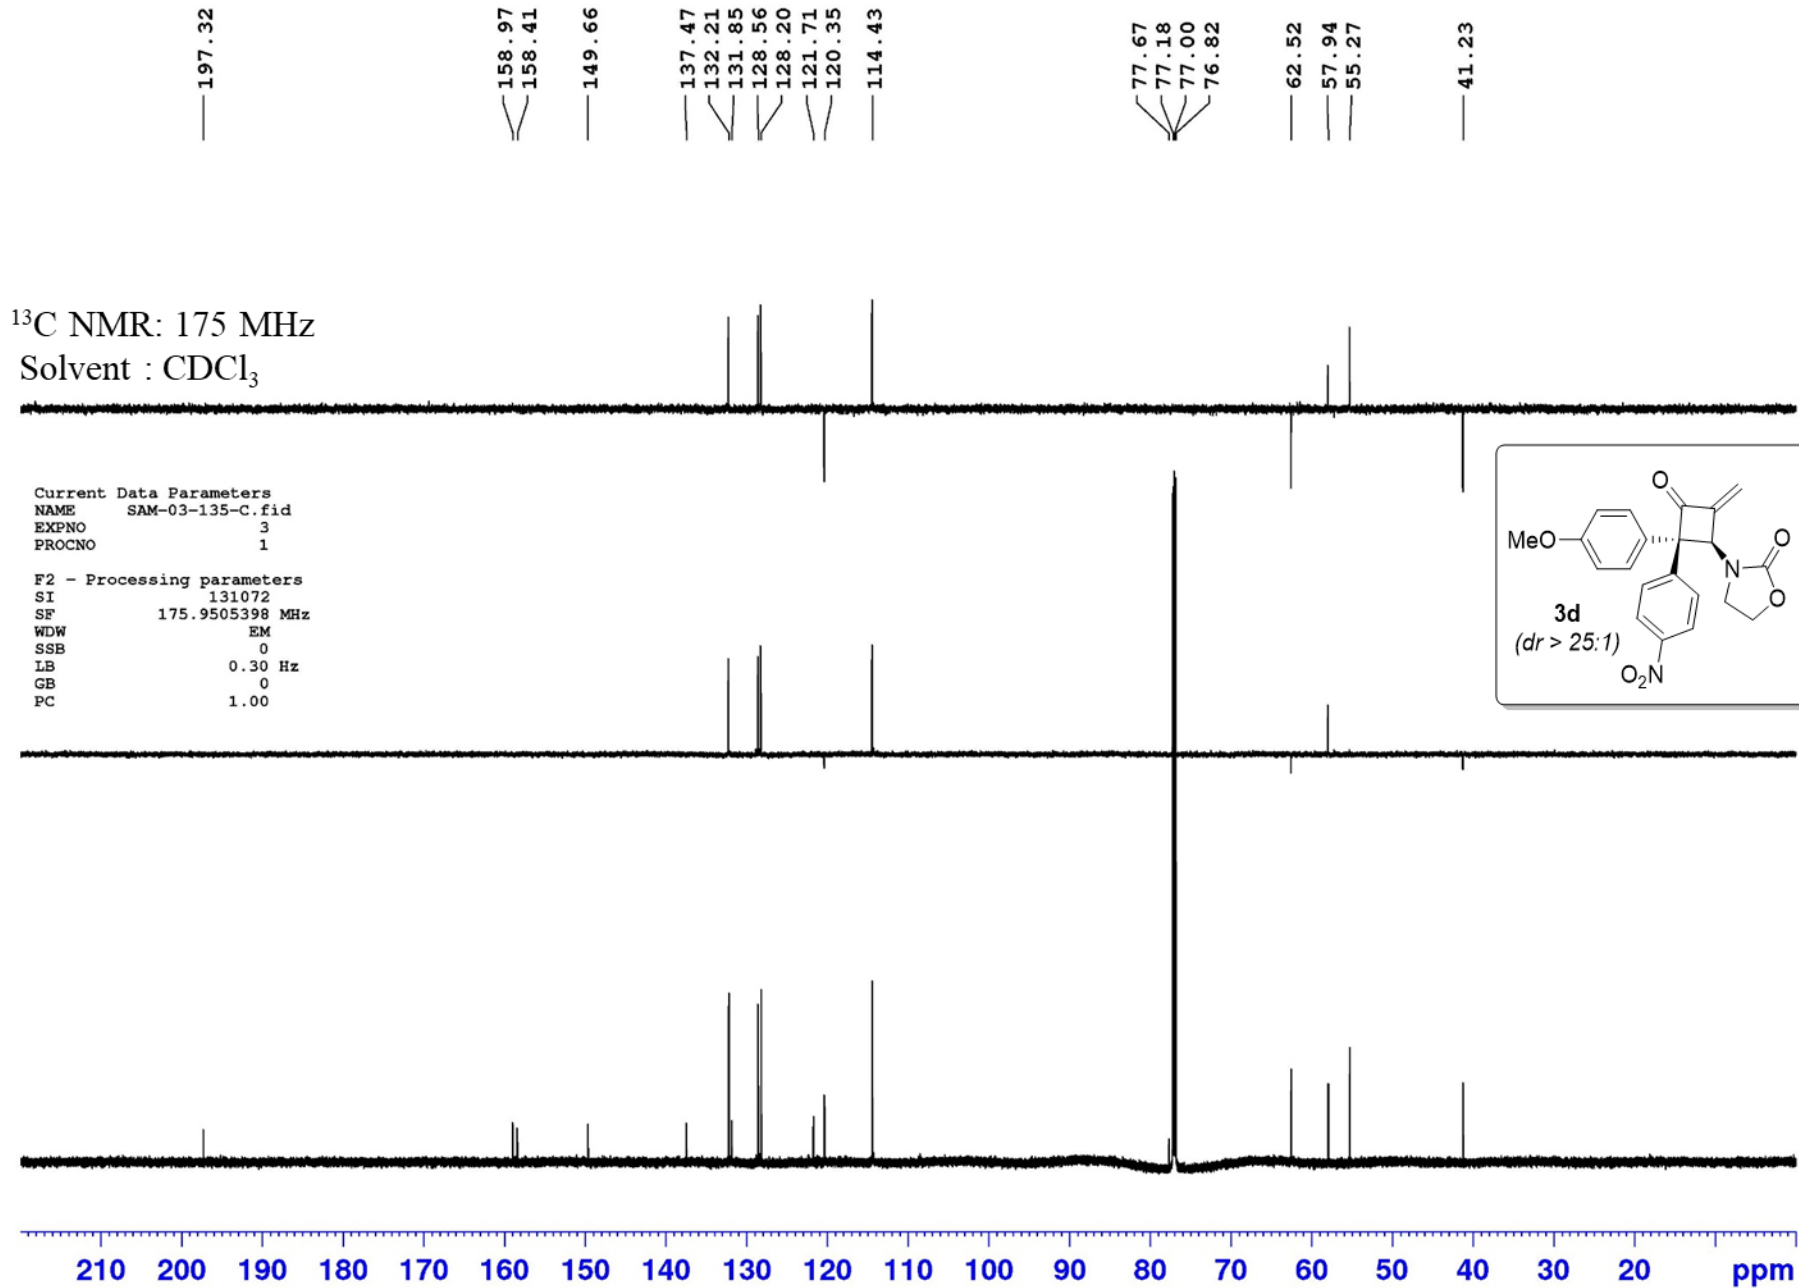

$^1\text{H}$  NMR: 700 MHz  
Solvent :  $\text{CDCl}_3$

Current Data Parameters  
NAME SAM-03-141-H.fid  
EXPNO 1  
PROCNO 1  
F2 - Processing parameters  
SI 65536  
SF 699.7431002 MHz  
WDW EM  
SSB 0  
LB 0.30 Hz  
GB 0  
PC 1.00

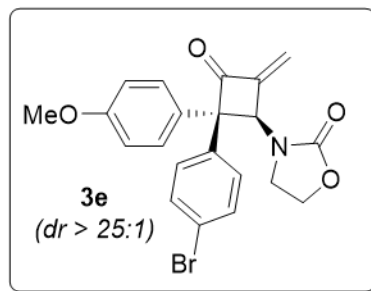

7.623  
7.610  
7.423  
7.411  
7.240  
7.160  
7.147  
6.868  
6.856

6.283  
6.282  
6.279  
6.277  
5.860  
5.856  
5.852  
5.451  
5.449  
5.448  
5.446

4.173  
4.165  
4.160  
4.152  
4.148  
4.139  
3.831  
3.818  
3.807  
3.794  
3.780  
3.746  
3.305  
3.293  
3.281  
3.269

2.298  
2.290  
2.285  
2.277  
2.273  
2.265

1.546

1.234

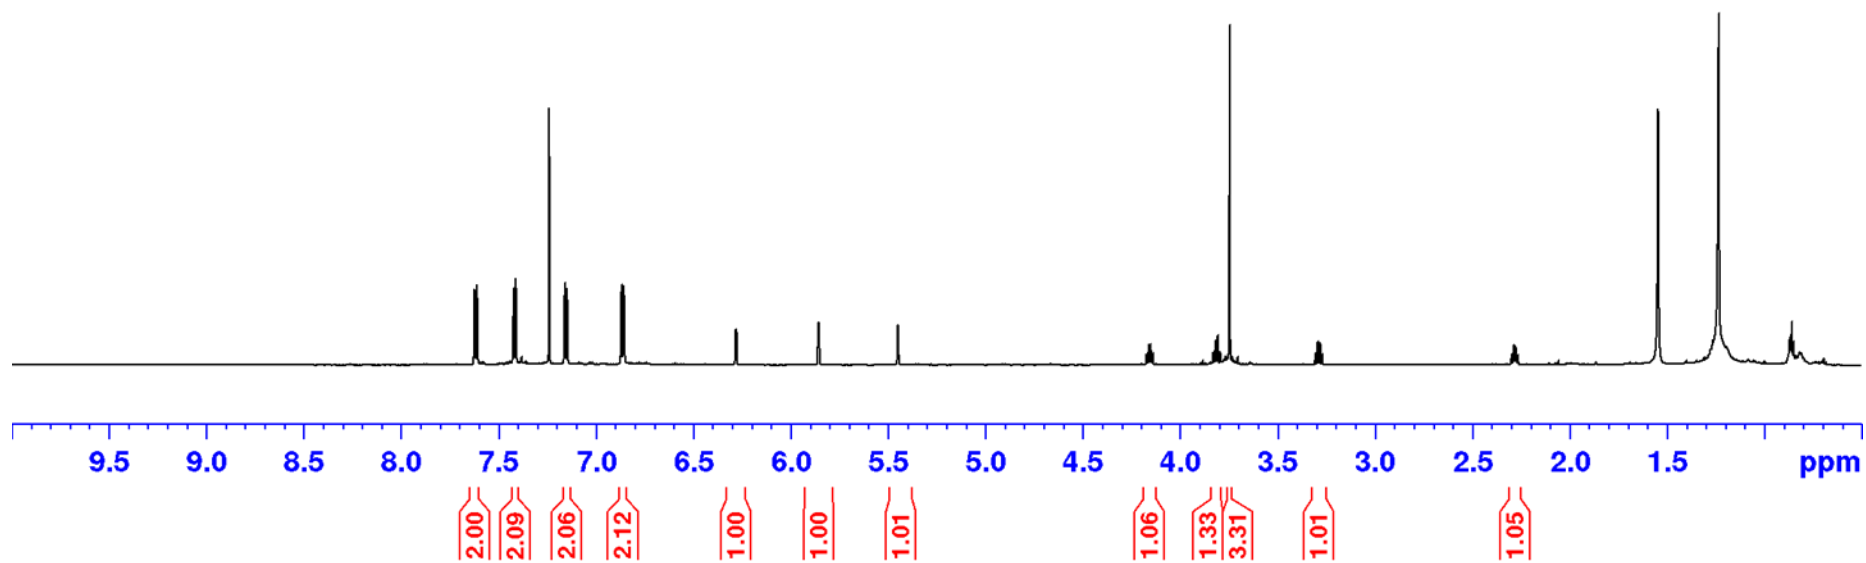

$^{13}\text{C}$  NMR: 175 MHz

Solvent :  $\text{CDCl}_3$

Current Data Parameters  
NAME SAM-03-141-C.fid  
EXPNO 3  
PROCNO 1

F2 - Processing parameters  
SI 131072  
SF 175.9505382 MHz  
WDW EM  
SSB 0  
LB 0.30 Hz  
GB 0  
PC 1.00

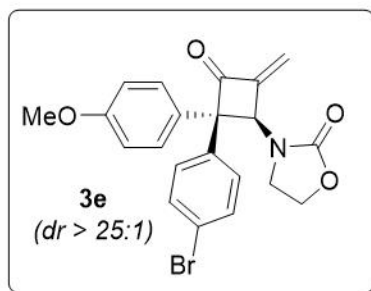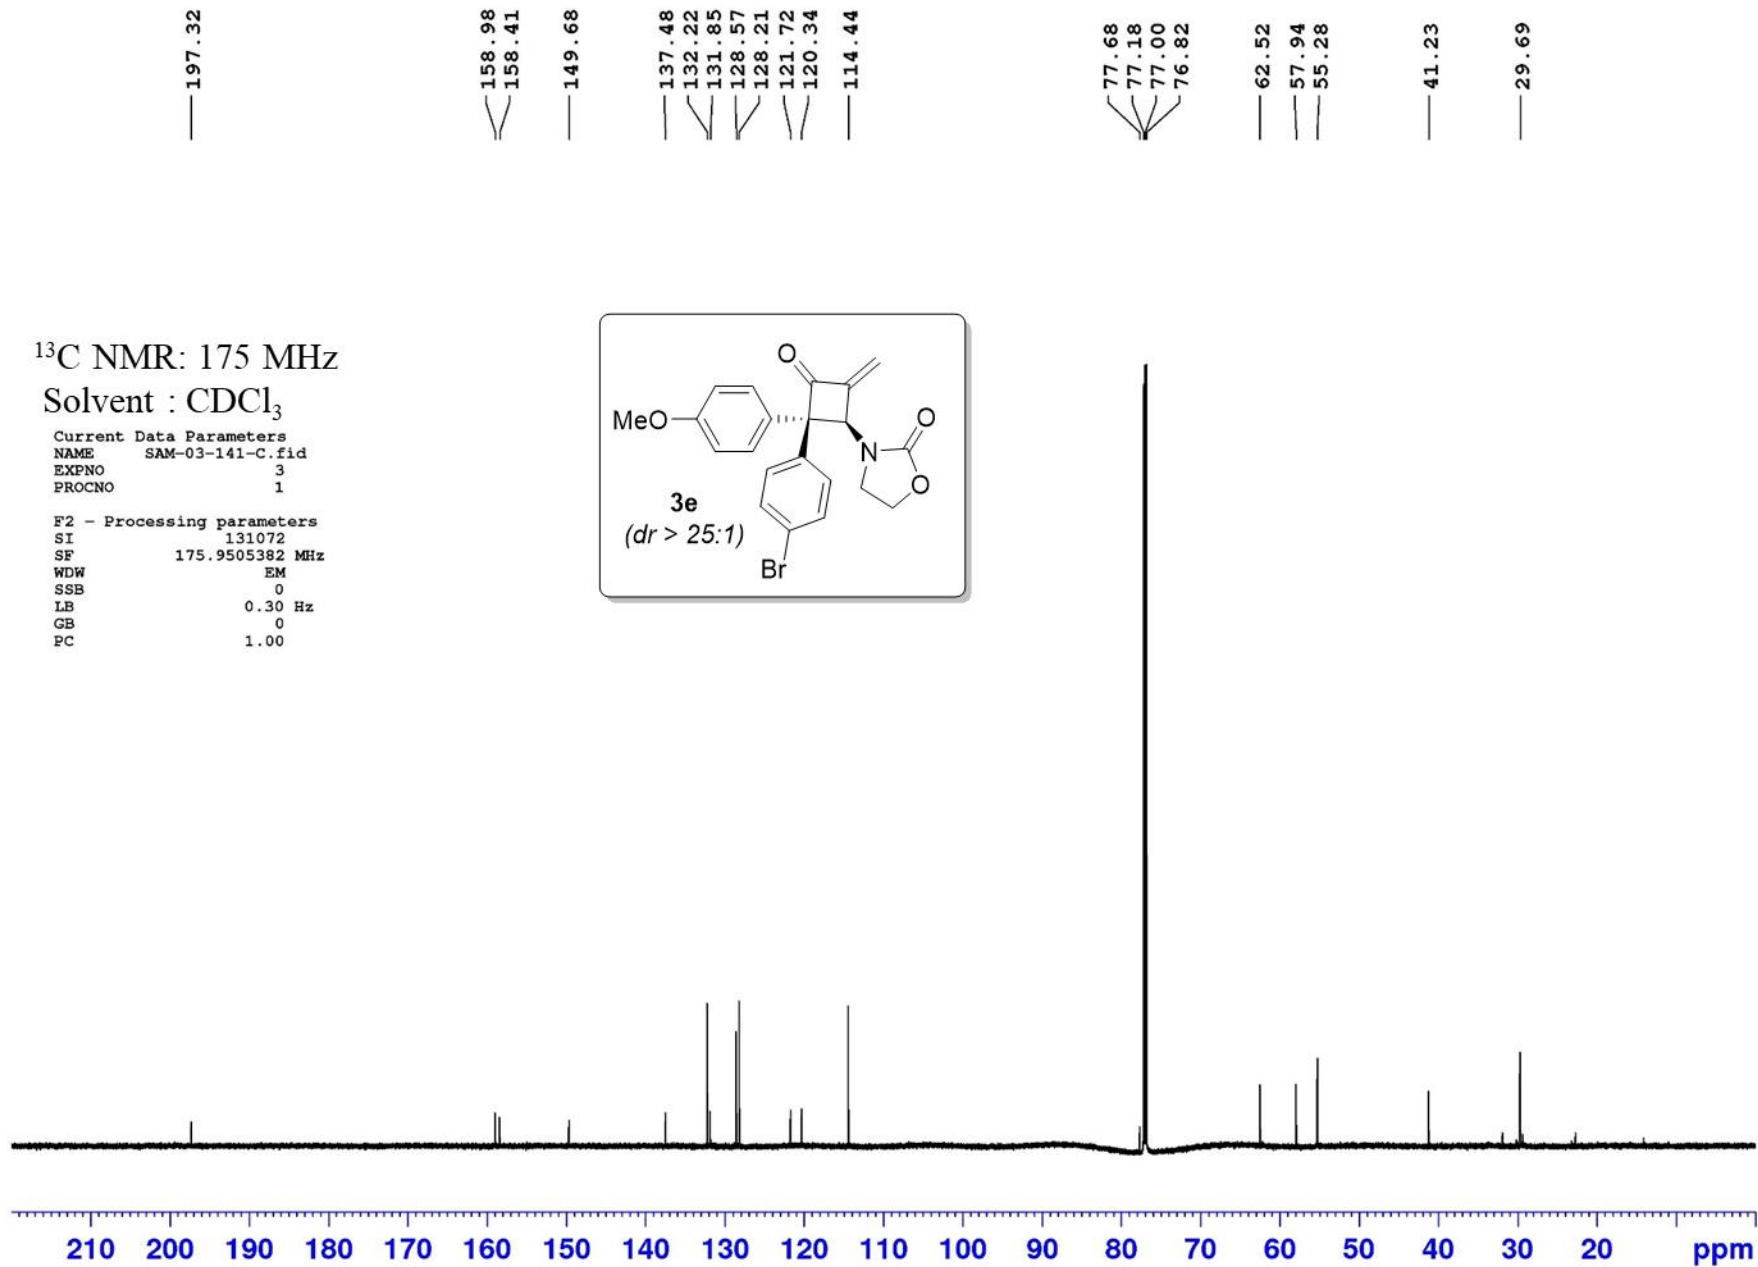

7.664  
7.651  
7.326  
7.323  
7.320  
7.245  
7.240  
7.233  
7.221  
7.200  
7.189  
7.183  
7.180  
7.178  
7.173  
7.170  
7.166  
6.875  
6.871  
6.868  
6.858  
6.846  
6.822  
6.810  
6.774  
6.771  
6.769  
6.753  
6.750  
6.741  
6.738  
6.263  
6.262  
6.257  
6.253  
6.252  
5.873  
5.841  
5.419  
5.406  
4.136  
4.134  
4.128  
4.123  
4.115  
4.111  
4.102  
3.811  
3.799  
3.790  
3.775  
3.762  
3.750  
3.744  
3.739  
3.732  
3.713  
3.272  
3.259  
3.248  
3.235  
2.261  
2.252  
2.248  
2.240  
2.236  
2.230  
2.227  
2.222  
2.218  
2.210  
2.205  
2.197  
1.599

<sup>1</sup>H NMR: 700 MHz  
Solvent : CDCl<sub>3</sub>

7.323  
7.320  
7.240  
7.233  
7.189  
7.183  
7.178  
7.170  
6.871  
6.868  
6.858  
6.846  
6.822  
6.810  
6.774  
6.771  
6.769  
6.753  
6.741

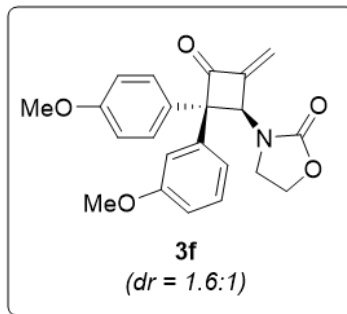

Current Data Parameters  
NAME SAM-03-151-H.fid  
EXPNO 1  
PROCNO 1

F2 - Processing parameters  
SI 65536  
SF 699.7431022 MHz  
WDW EM  
SSB 0  
LB 0.30 Hz  
GB 0  
PC 1.00

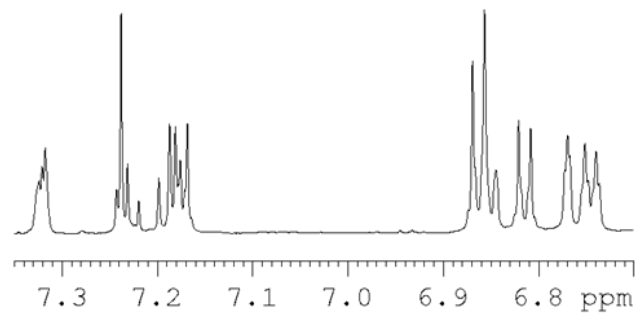

1.353  
3.382  
3.252  
1.380  
3.046

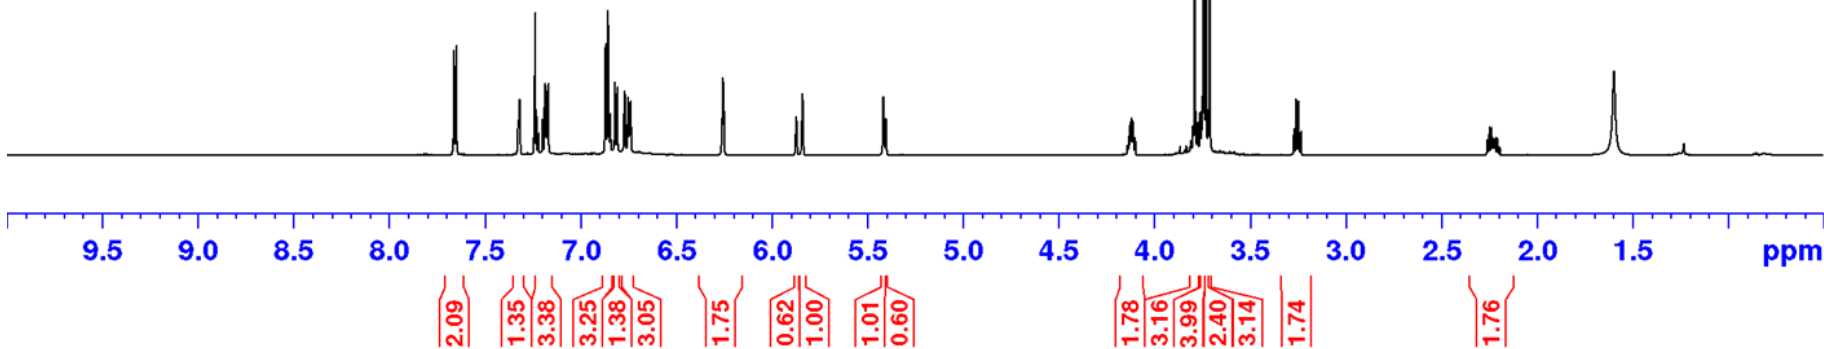

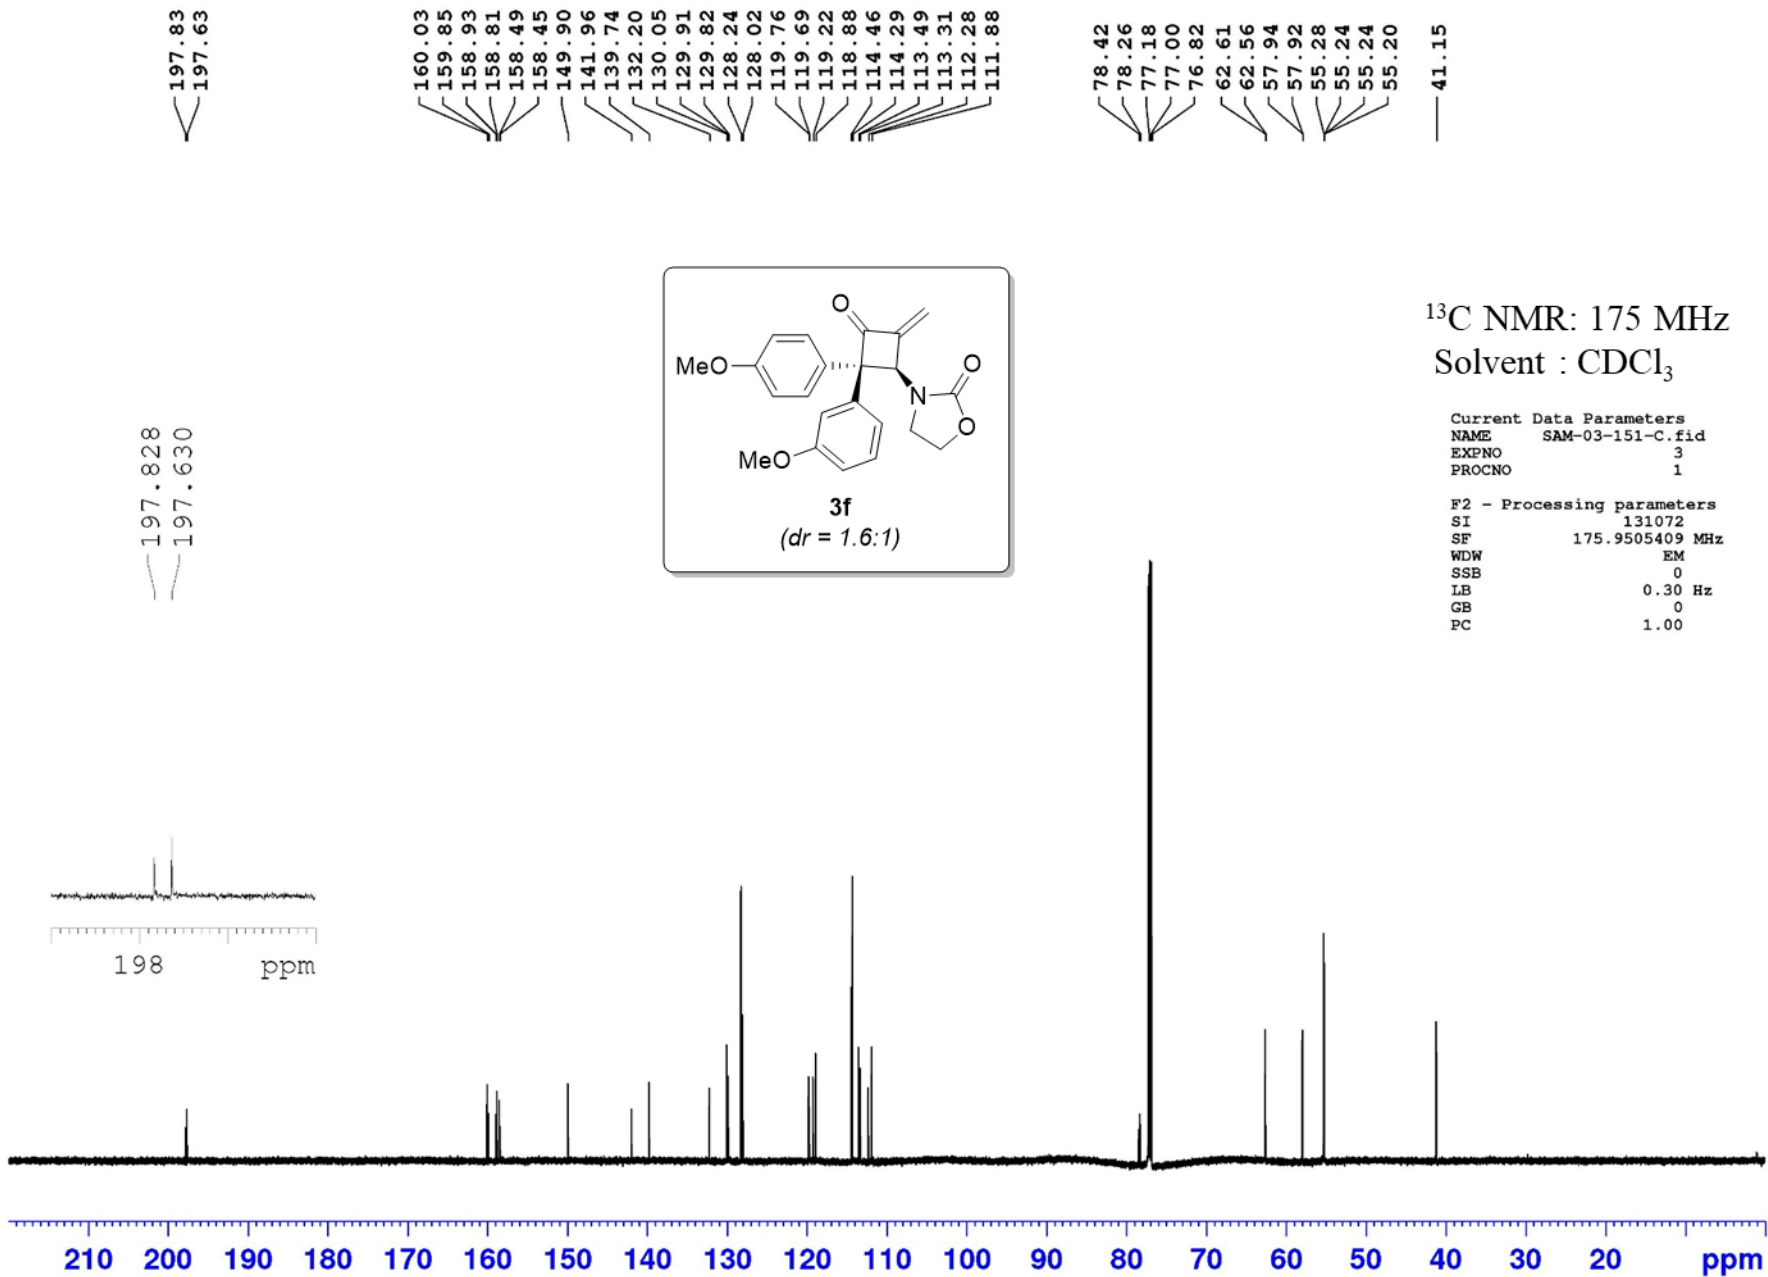



<sup>1</sup>H NMR: 700 MHz  
Solvent : CDCl<sub>3</sub>

7.658  
7.646  
7.240  
7.175  
7.164  
7.154  
7.048  
7.035  
7.023  
7.012  
6.871  
6.859  
6.254  
6.250  
5.857  
5.853  
5.849  
5.400  
4.121  
4.113  
4.108  
4.100  
4.096  
4.088  
3.746  
3.719  
3.707  
3.695  
3.682  
3.241  
3.229  
3.217  
3.205  
2.267  
2.154  
2.146  
2.141  
2.133  
2.128  
2.120  
1.558

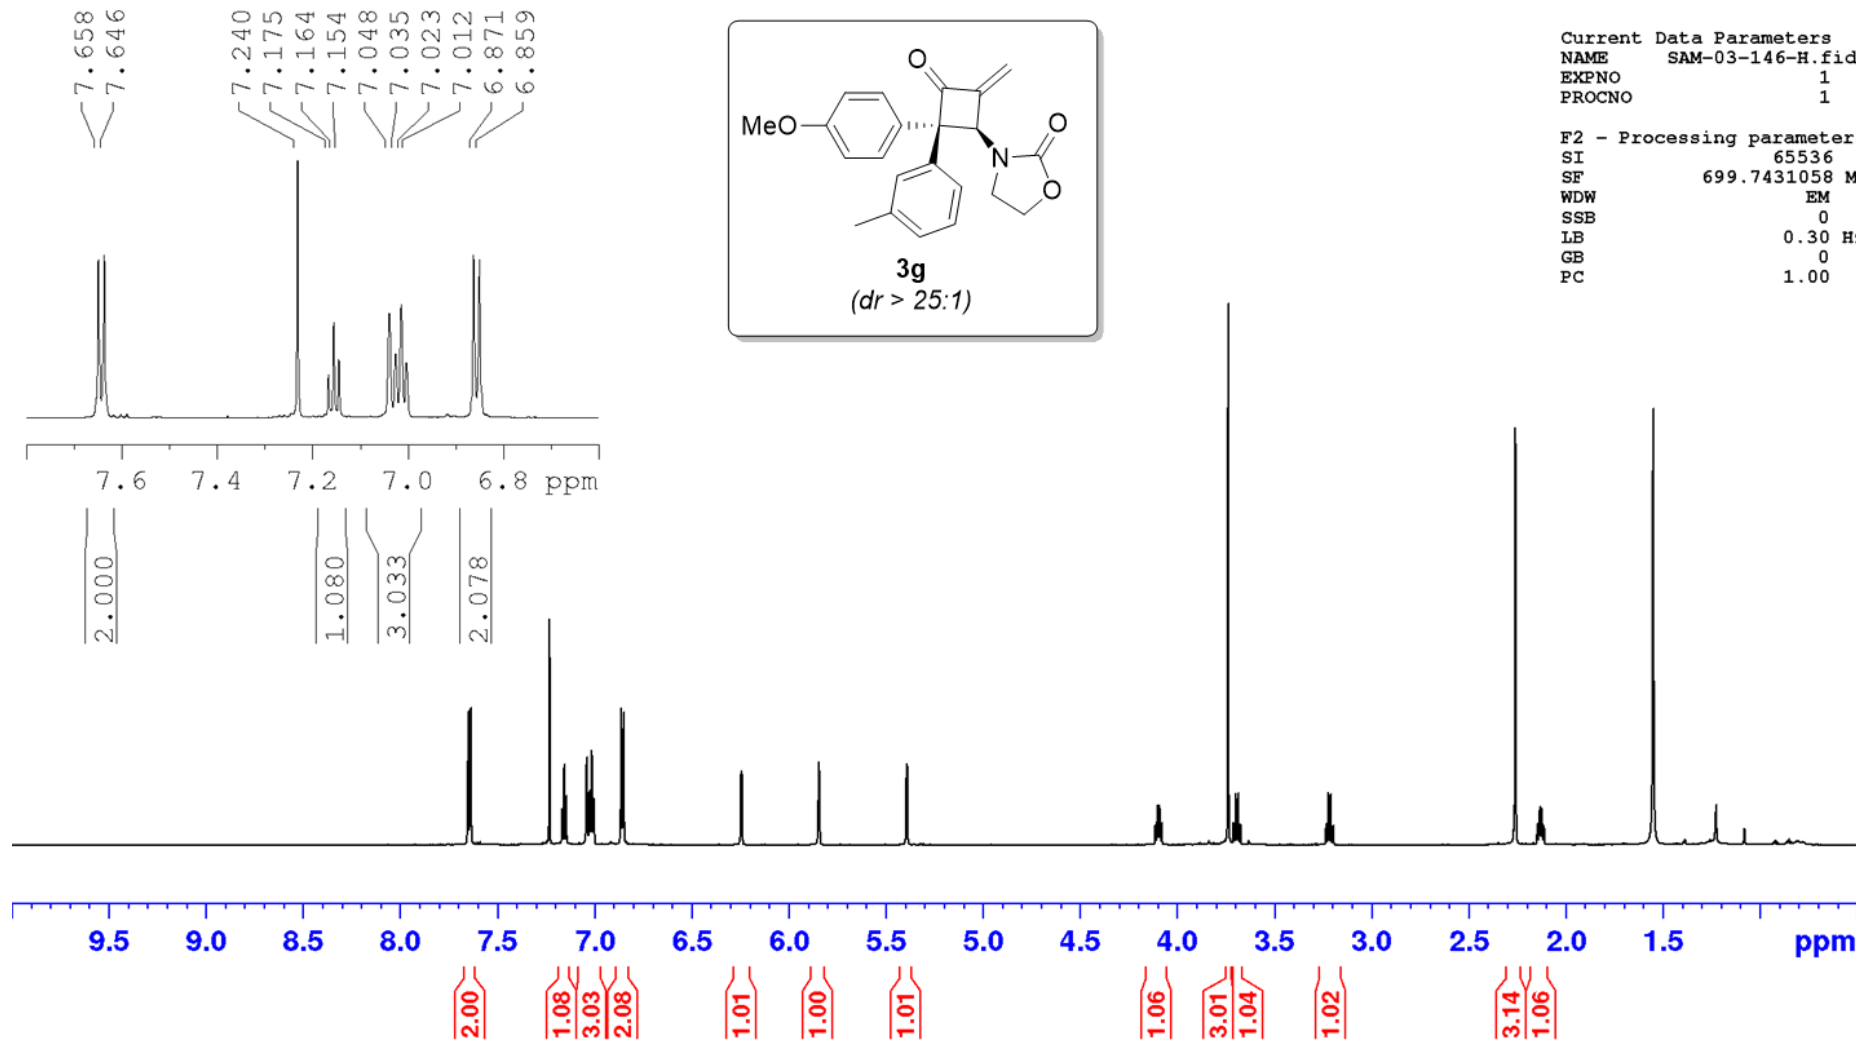

<sup>13</sup>C NMR: 175 MHz  
Solvent : CDCl<sub>3</sub>

Current Data Parameters  
NAME SAM-03-146-C.fid  
EXPNO 3  
PROCNO 1  
  
F2 - Processing parameters  
SI 131072  
SF 175.9505384 MHz  
WDW EM  
SSB 0  
LB 0.30 Hz  
GB 0  
PC 1.00

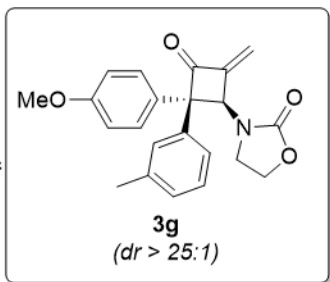

198.03

158.76  
158.48

149.99

138.83

138.24

132.42

128.96

128.28

128.22

127.27

123.93

119.56

114.26

78.34

77.18

77.00

76.82

62.54

57.84

55.25

41.07

21.48

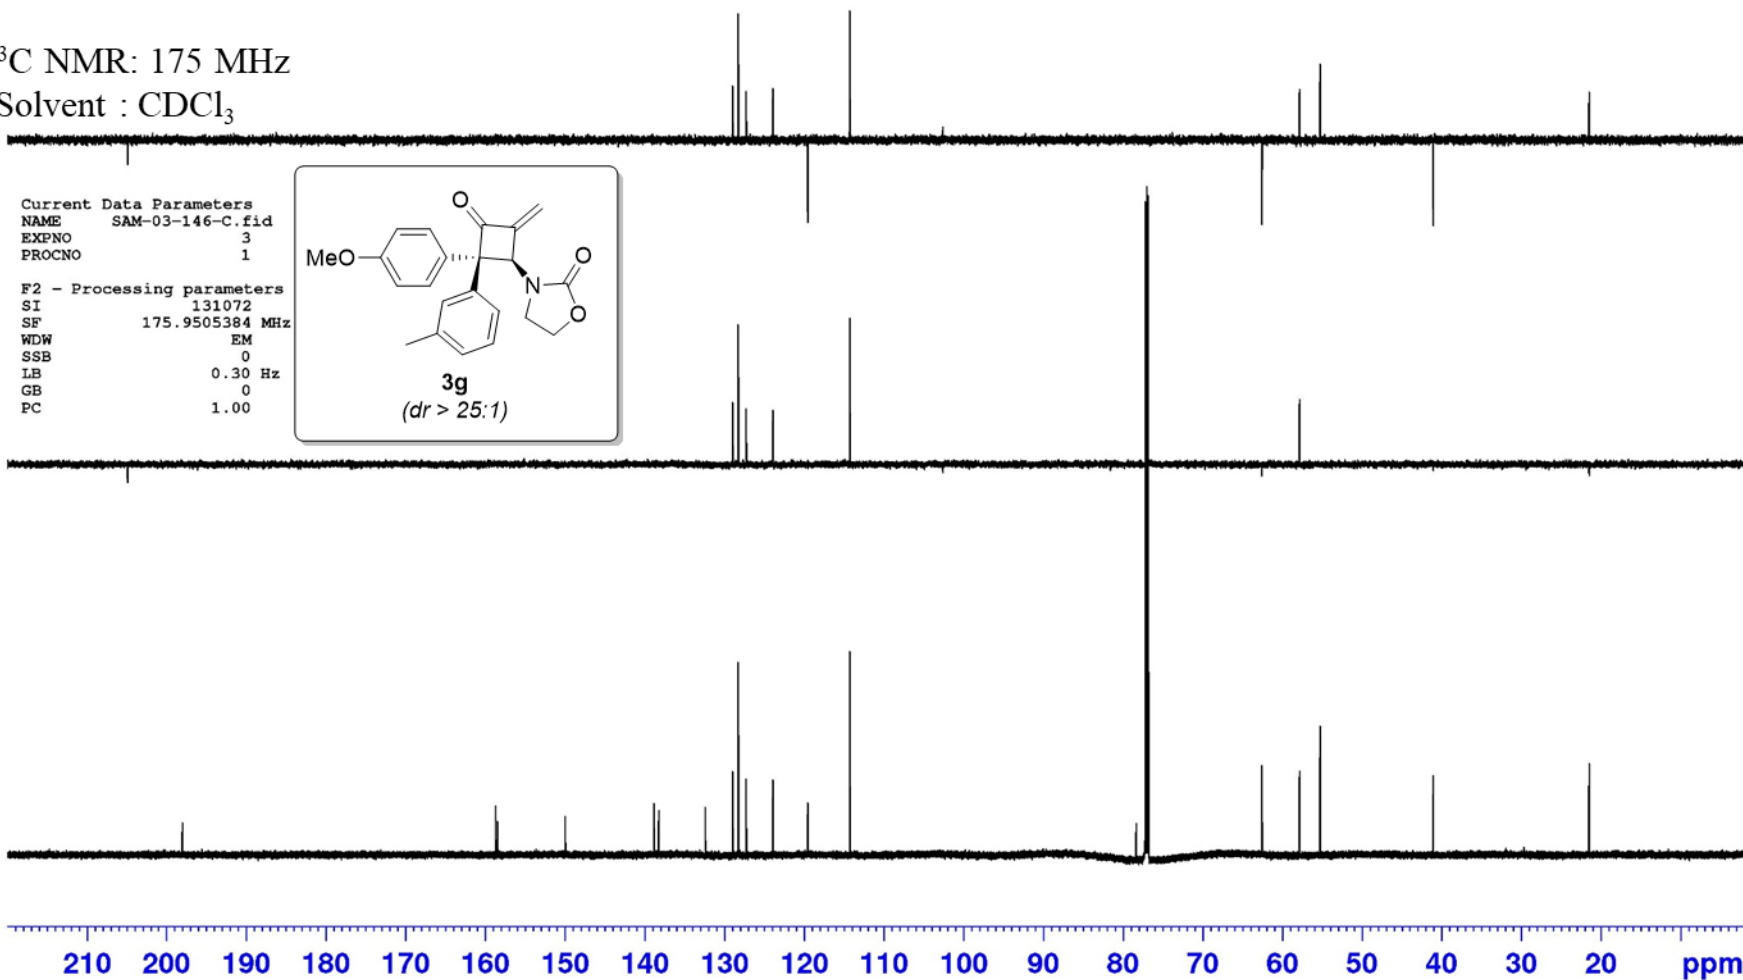

$^1\text{H}$  NMR: 700 MHz  
Solvent :  $\text{CDCl}_3$

7.643  
7.630  
7.318  
7.240  
7.230  
7.219  
7.207  
7.197  
7.195  
7.119  
7.108  
6.881  
6.869

6.286  
6.284  
6.282  
5.868  
5.446

4.174  
4.166  
4.161  
4.154  
4.149  
4.141  
3.811  
3.800  
3.787  
3.775  
3.752  
3.310  
3.298  
3.285  
3.273

2.255  
2.247  
2.242  
2.234  
2.229  
2.221  
1.547

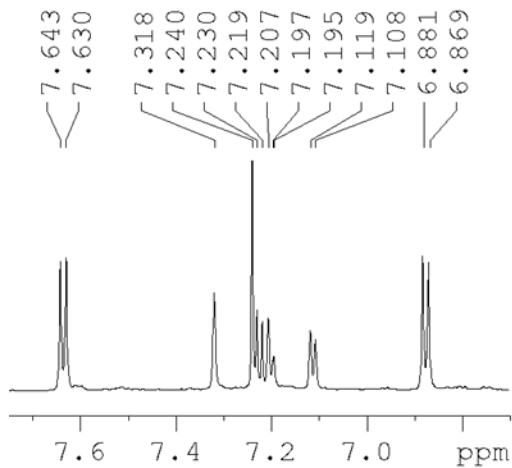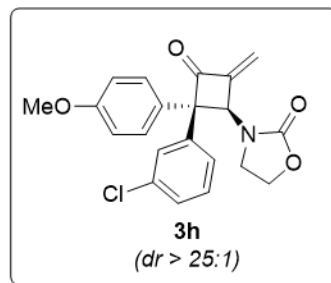

Current Data Parameters  
NAME SAM-03-133-H.fid  
EXPNO 1  
PROCNO 1  
  
F2 - Processing parameters  
SI 65536  
SF 699.7431021 MHz  
WDW EM  
SSB 0  
LB 0.30 Hz  
GB 0  
PC 1.00

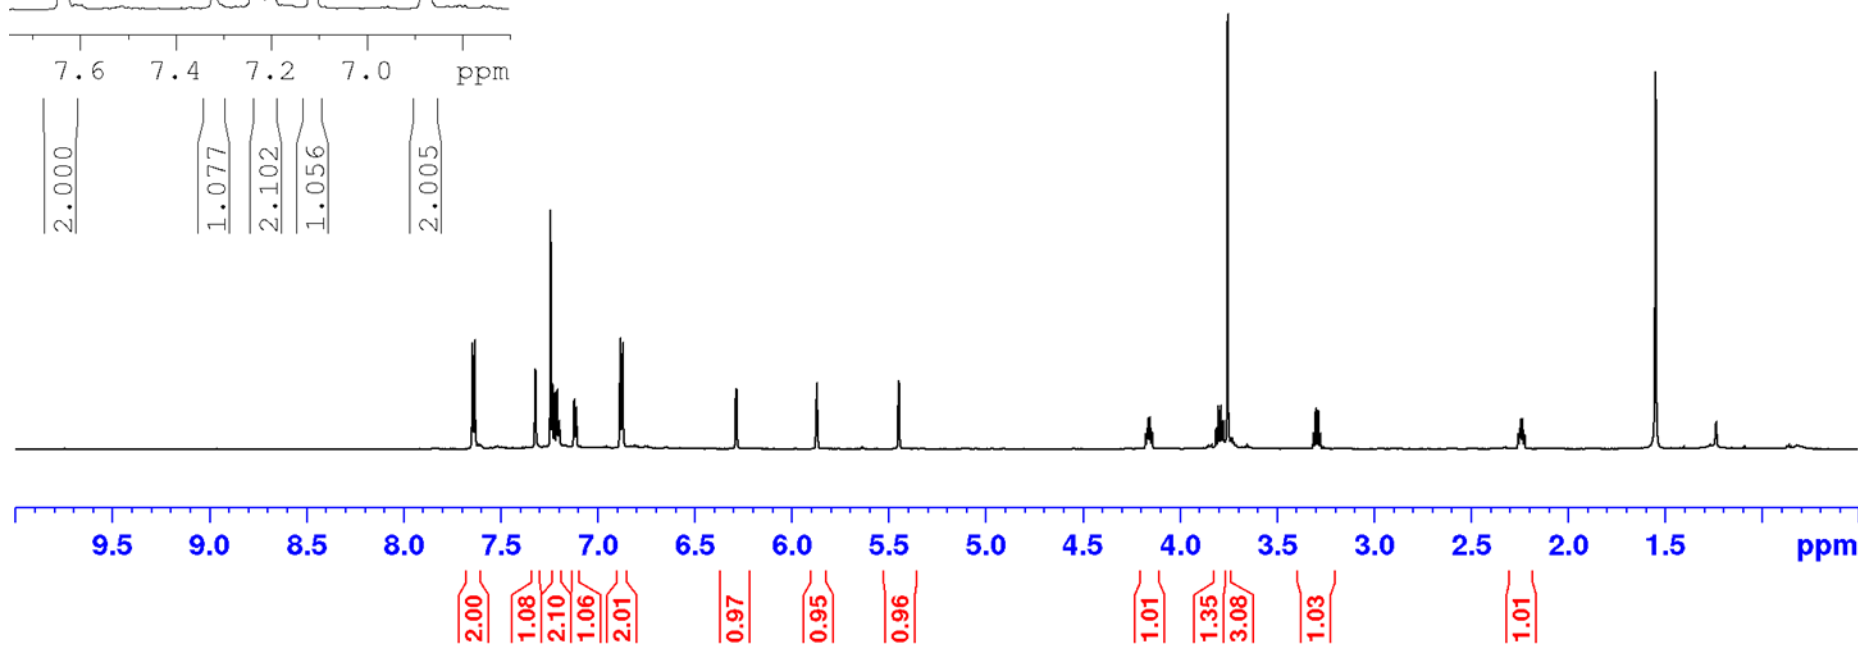

$^{13}\text{C}$  NMR: 175 MHz  
Solvent :  $\text{CDCl}_3$

Current Data Parameters  
NAME SAM-03-133-C.fid  
EXPNO 3  
PROCNO 1

F2 - Processing parameters  
SI 131072  
SF 175.9505390 MHz  
WDW EM  
SSB 0  
LB 0.30 Hz  
GB 0  
PC 1.00

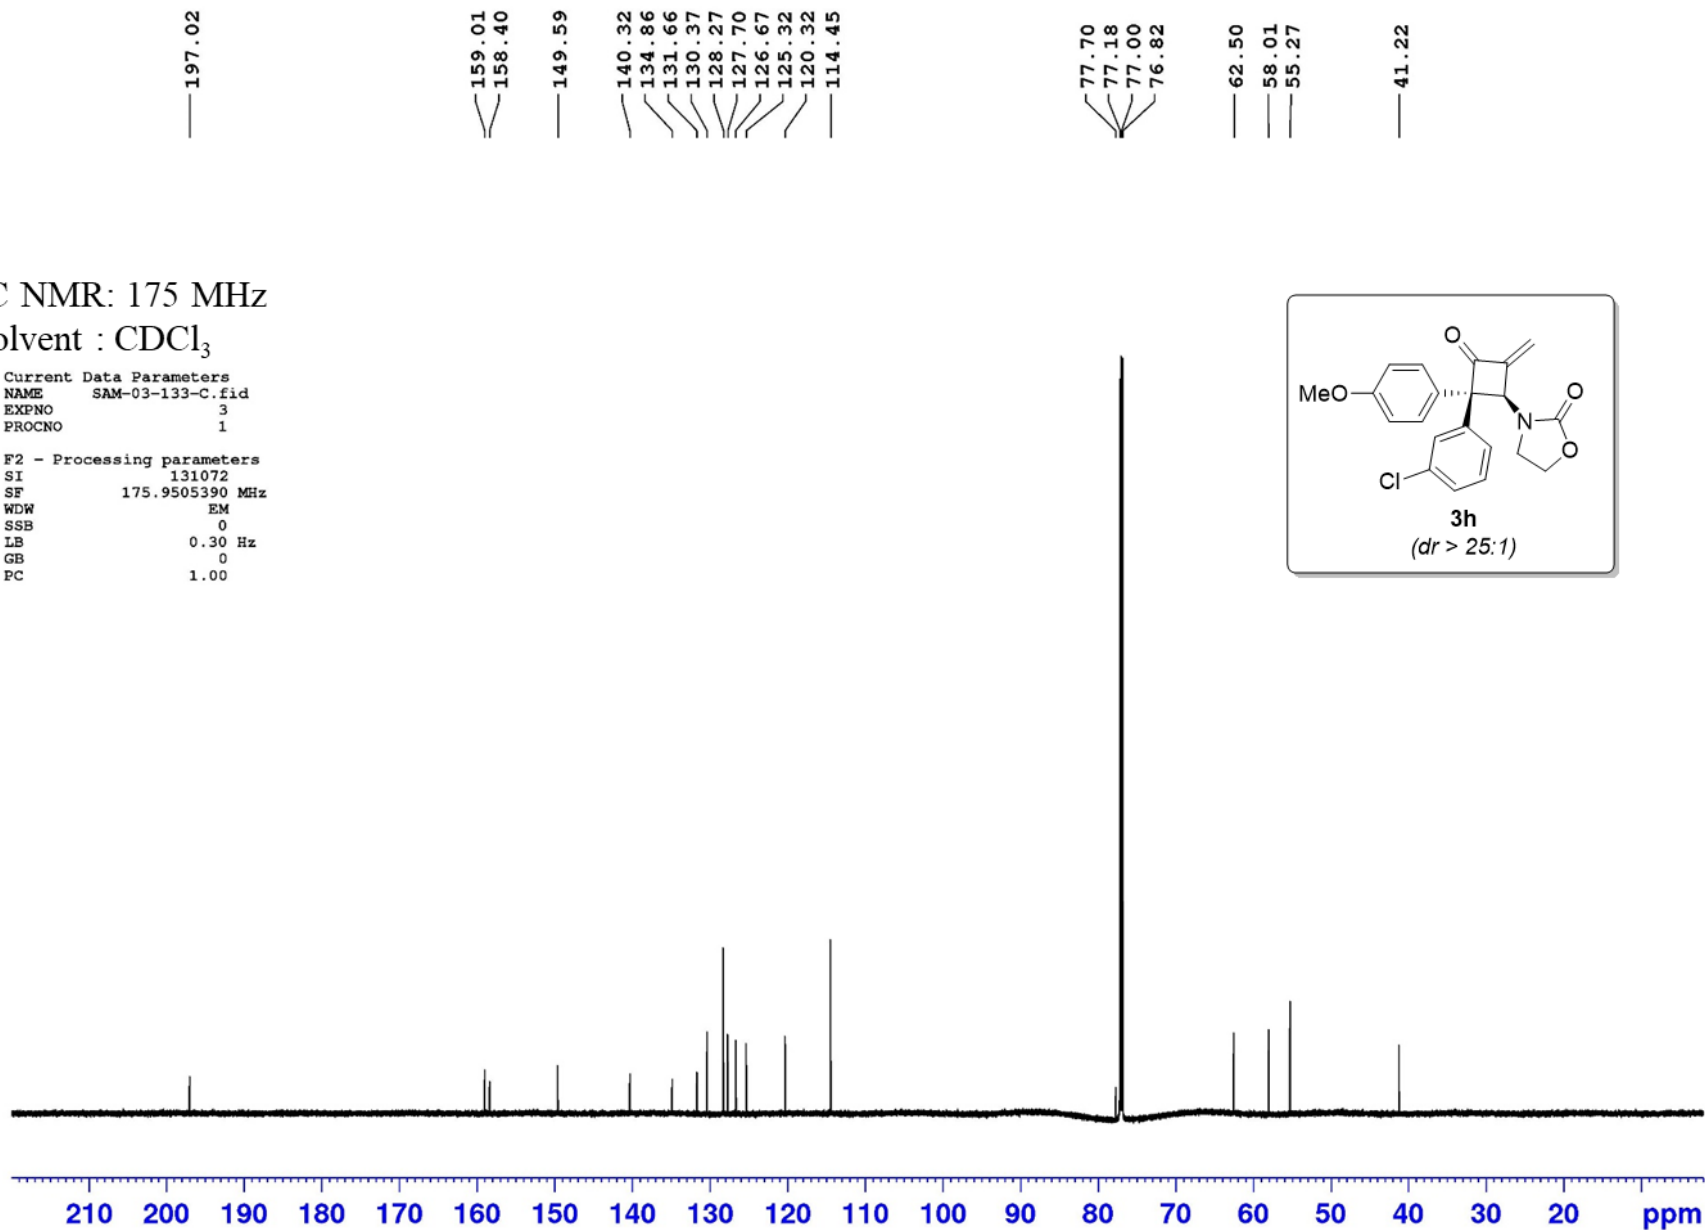

197.02

159.01  
158.40

149.59

140.32

134.86

131.66

130.37

128.27

127.70

126.67

125.32

120.32

114.45

77.70  
77.18  
77.00  
76.82

62.50

58.01

55.27

41.22

<sup>1</sup>H NMR: 700 MHz  
Solvent : CDCl<sub>3</sub>

7.639  
7.627  
7.466  
7.367  
7.364  
7.359  
7.355  
7.354  
7.351  
7.240  
7.181  
7.170  
7.166  
7.163  
6.881  
6.869

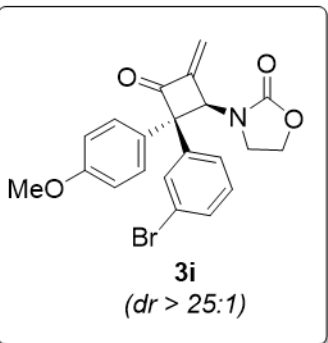

6.281

5.866

5.445

4.178  
4.170  
4.166  
4.158  
4.153  
4.145  
3.822  
3.810  
3.798  
3.785  
3.777  
3.752  
3.310  
3.298  
3.286  
3.273

2.247  
2.239  
2.235  
2.227  
2.222  
2.214

1.544

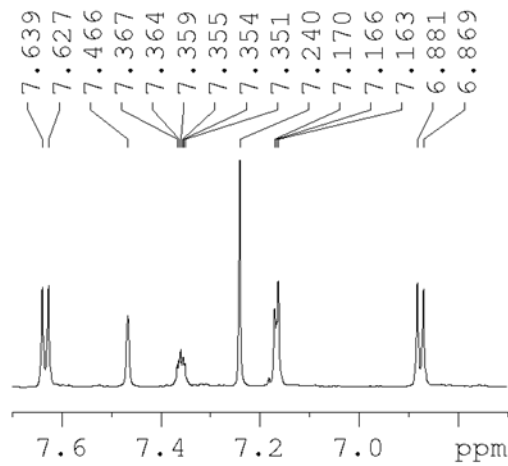

Current Data Parameters  
NAME SAM-03-132-H.fid  
EXPNO 1  
PROCNO 1

F2 - Processing parameters  
SI 65536  
SF 699.7431021 MHz  
WDW EM  
SSB 0  
LB 0.30 Hz  
GB 0  
PC 1.00

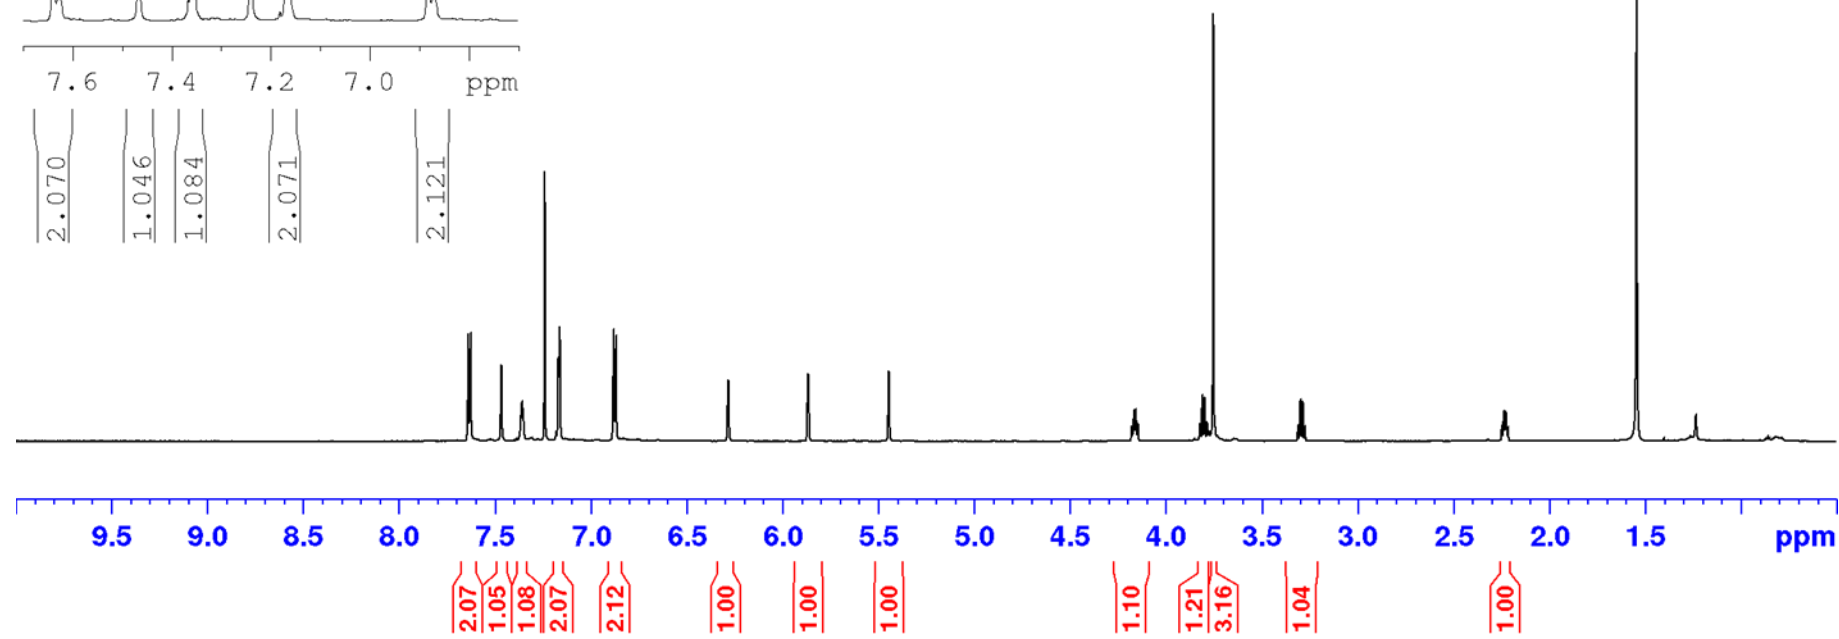

<sup>13</sup>C NMR: 175 MHz  
Solvent : CDCl<sub>3</sub>

Current Data Parameters  
NAME SAM-03-132-C.fid  
EXPNO 3  
PROCNO 1

F2 - Processing parameters  
SI 131072  
SF 175.9505388 MHz  
WDW EM  
SSB 0  
LB 0.30 Hz  
GB 0  
PC 1.00

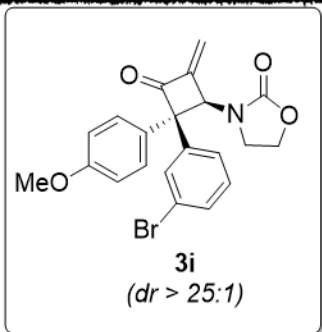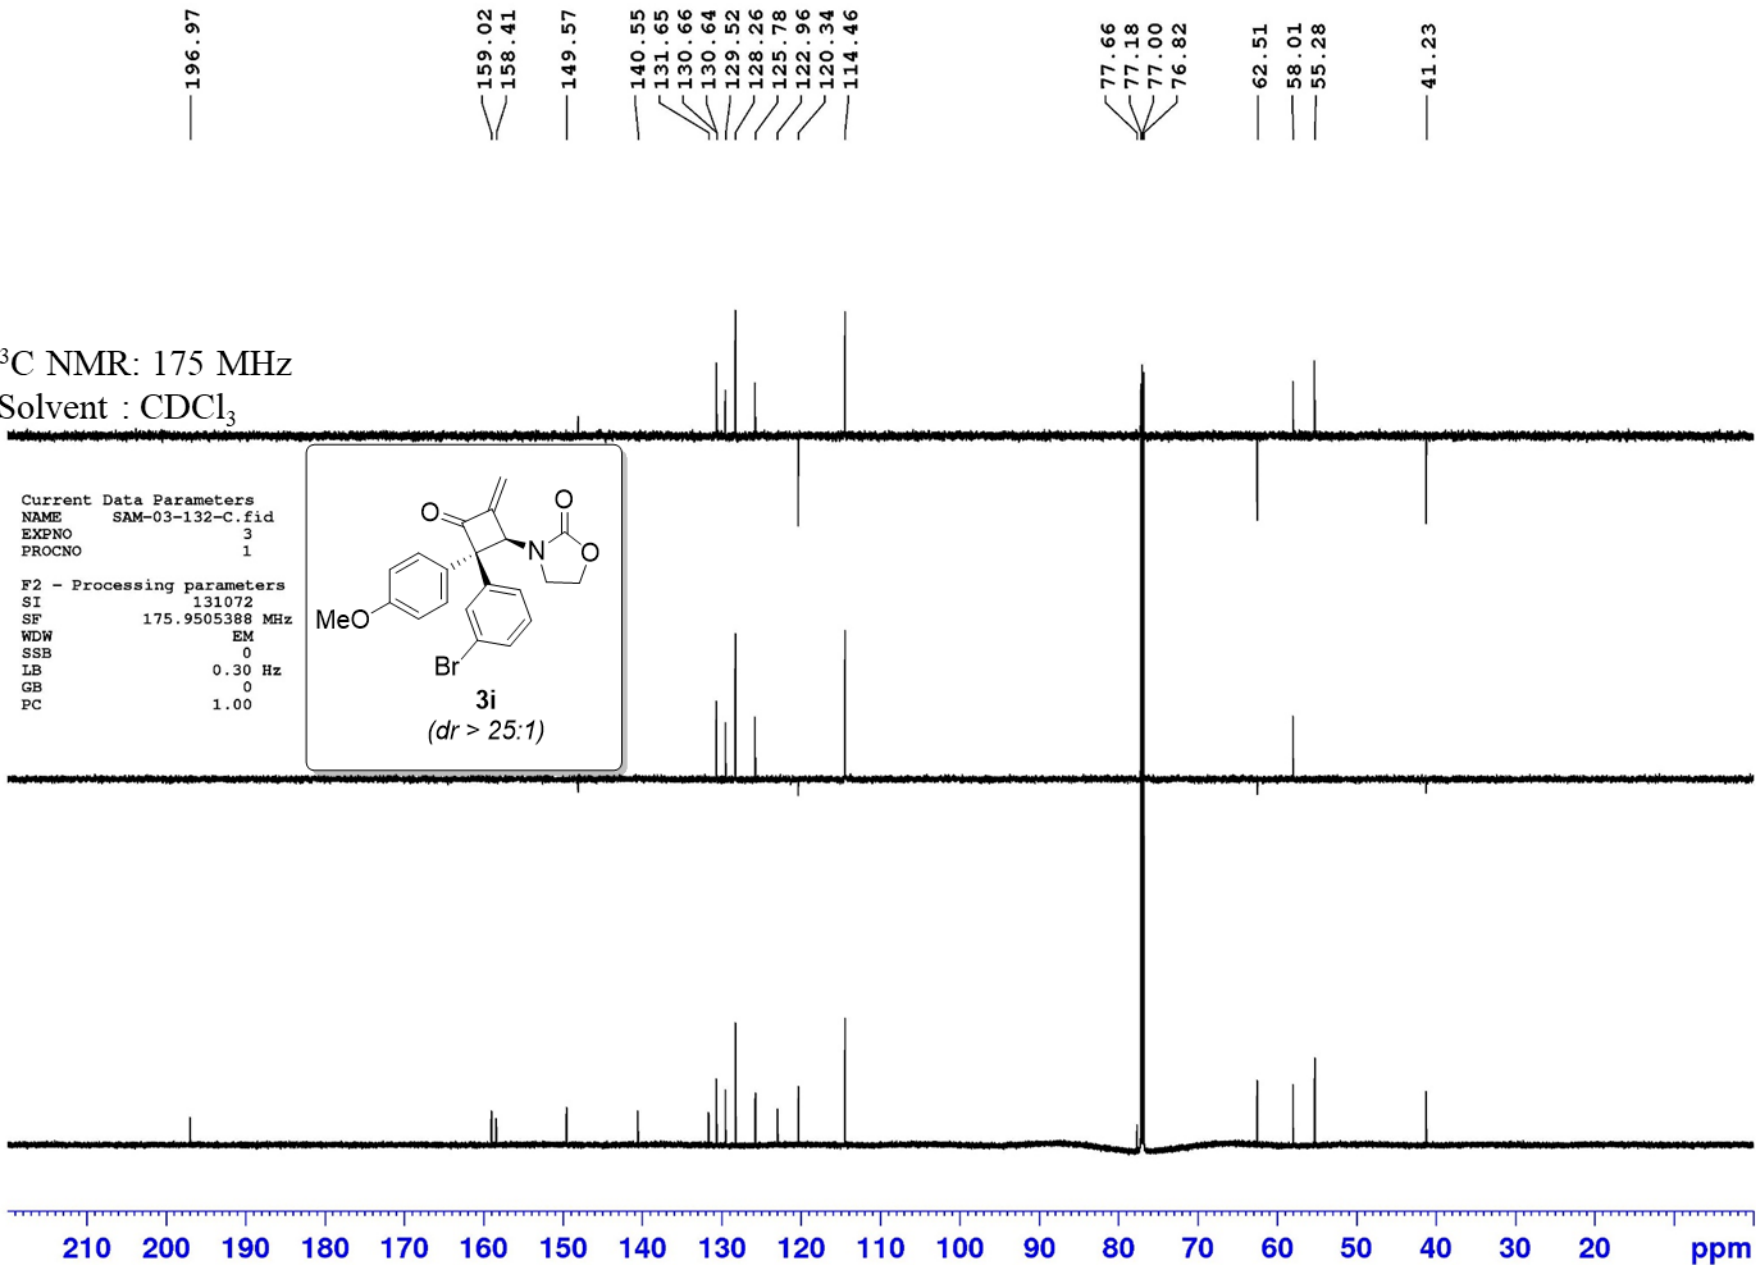

<sup>1</sup>H NMR: 700 MHz  
Solvent : CDCl<sub>3</sub>

7.734  
7.723  
7.625  
7.613  
7.330  
7.319  
7.307  
7.277  
7.268  
7.262  
7.252  
7.240  
7.216  
7.207  
7.198  
7.187  
7.142  
7.131  
7.093  
7.081  
6.256  
5.903  
5.898  
5.894  
5.410  
4.125  
4.117  
4.112  
4.107  
4.105  
4.100  
4.095  
4.092  
4.087  
4.083  
4.075  
3.758  
3.746  
3.734  
3.722  
3.710  
3.698  
3.685  
3.673  
3.258  
3.246  
3.234  
3.222  
3.210  
2.272  
2.261  
2.207  
2.199  
2.195  
2.187  
2.182  
2.174  
2.150  
2.142  
2.137  
2.129  
2.124  
2.116  
1.660

7.734  
7.723  
7.625  
7.613  
7.330  
7.319  
7.307  
7.277  
7.268  
7.262  
7.240  
7.207  
7.198  
7.142  
7.131  
7.093  
7.081

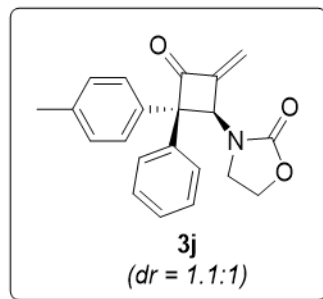

Current Data Parameters  
NAME SAM-03-147-H.fid  
EXPNO 1  
PROCNO 1  
  
F2 - Processing parameters  
SI 65536  
SF 699.7431058 MHz  
WDW EM  
SSB 0  
LB 0.30 Hz  
GB 0  
PC 1.00

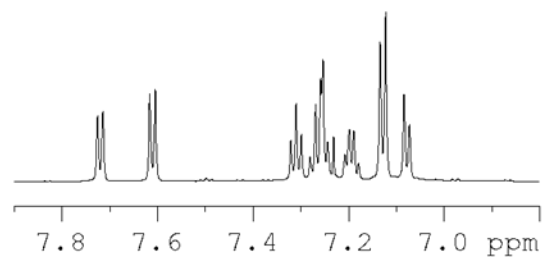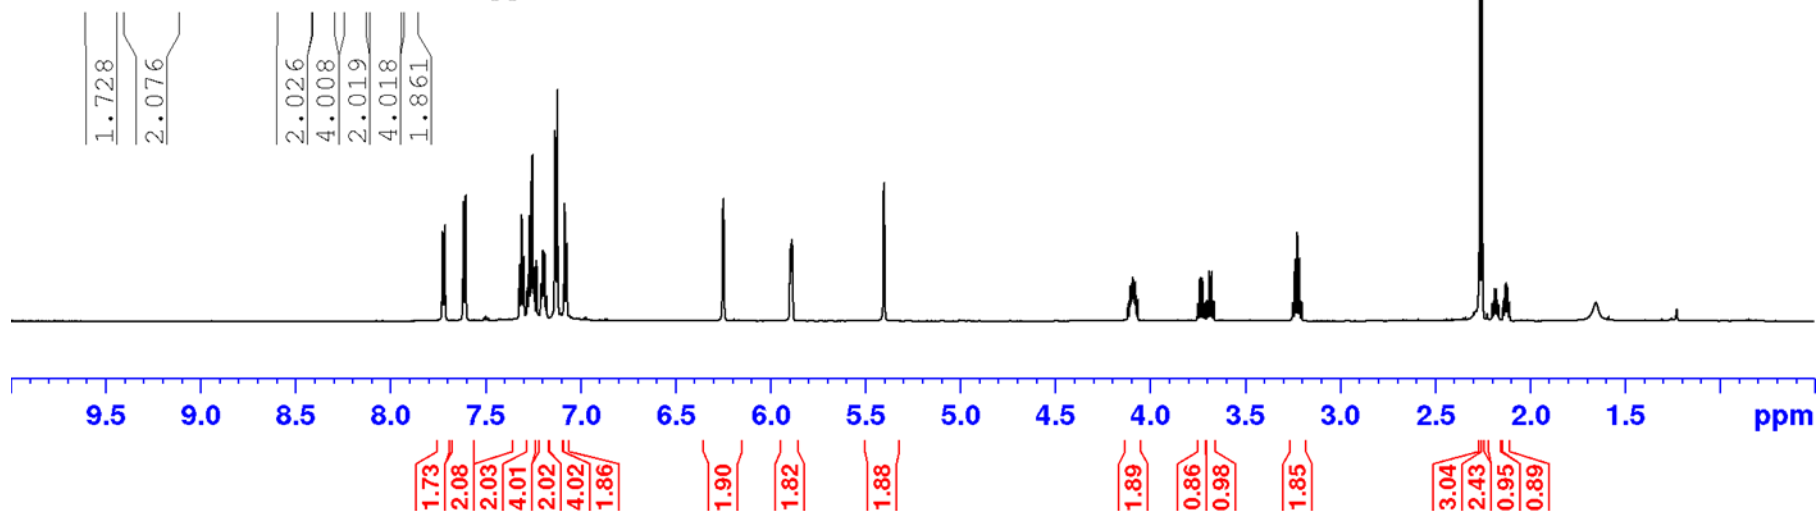

<sup>13</sup>C NMR: 175 MHz  
Solvent: CDCl<sub>3</sub>

Current Data Parameters  
NAME SAM-03-147-C.fid  
EXPNO 3  
PROCNO 1  
  
F2 - Processing parameters  
SI 131072  
SF 175.9505454 MHz  
WDW EM  
SSB 0  
LB 0.30 Hz  
GB 0  
PC 1.00

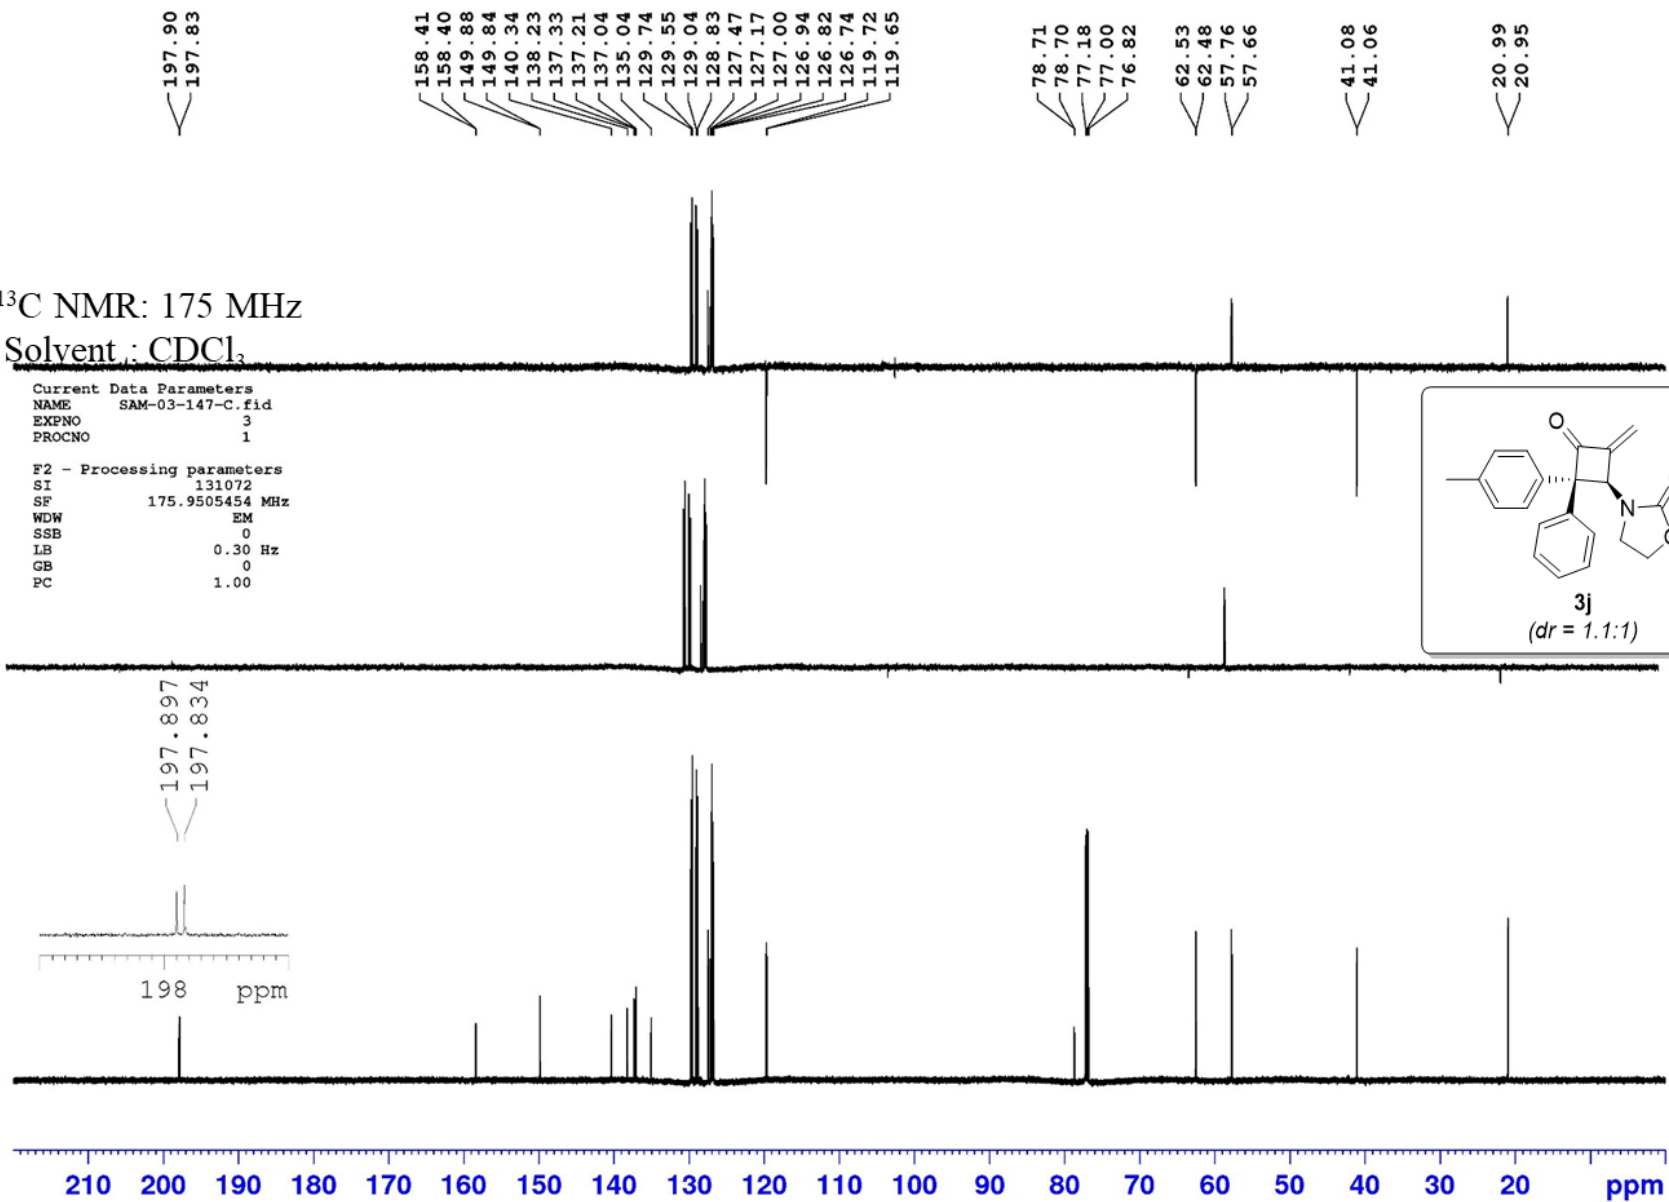



<sup>1</sup>H NMR: 700 MHz  
Solvent : CDCl<sub>3</sub>

7.628  
7.616  
7.269  
7.259  
7.244  
7.242  
7.231  
7.209  
7.208  
7.197  
7.189  
7.187  
6.847  
6.834

6.250  
5.855  
5.400

4.099  
4.091  
4.086  
4.079  
4.074  
4.066  
3.892  
3.883  
3.874  
3.699  
3.687  
3.674  
3.662  
3.235  
3.223  
3.211  
3.199

2.146  
2.138  
2.133  
2.125  
2.121  
2.113  
1.715  
1.706  
1.702  
1.696  
1.684  
1.675  
1.583  
1.443  
1.432  
1.421  
1.410  
0.928  
0.917  
0.906

7.269  
7.259  
7.244  
7.242  
7.231  
7.209  
7.208  
7.197  
7.189  
7.187

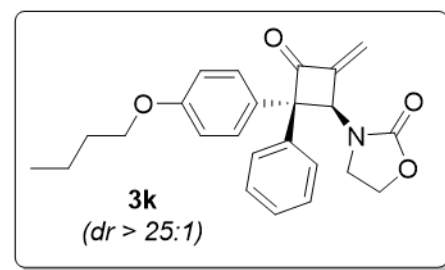

Current Data Parameters  
NAME SAM-03-142-H.fid  
EXPNO 1  
PROCNO 1  
  
F2 - Processing parameters  
SI 65536  
SF 699.7431058 MHz  
WDW EM  
SSB 0  
LB 0.30 Hz  
GB 0  
PC 1.00

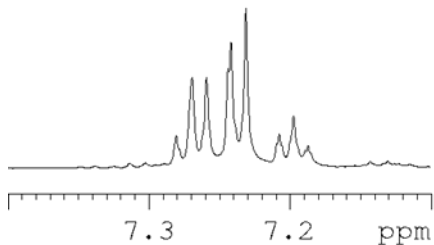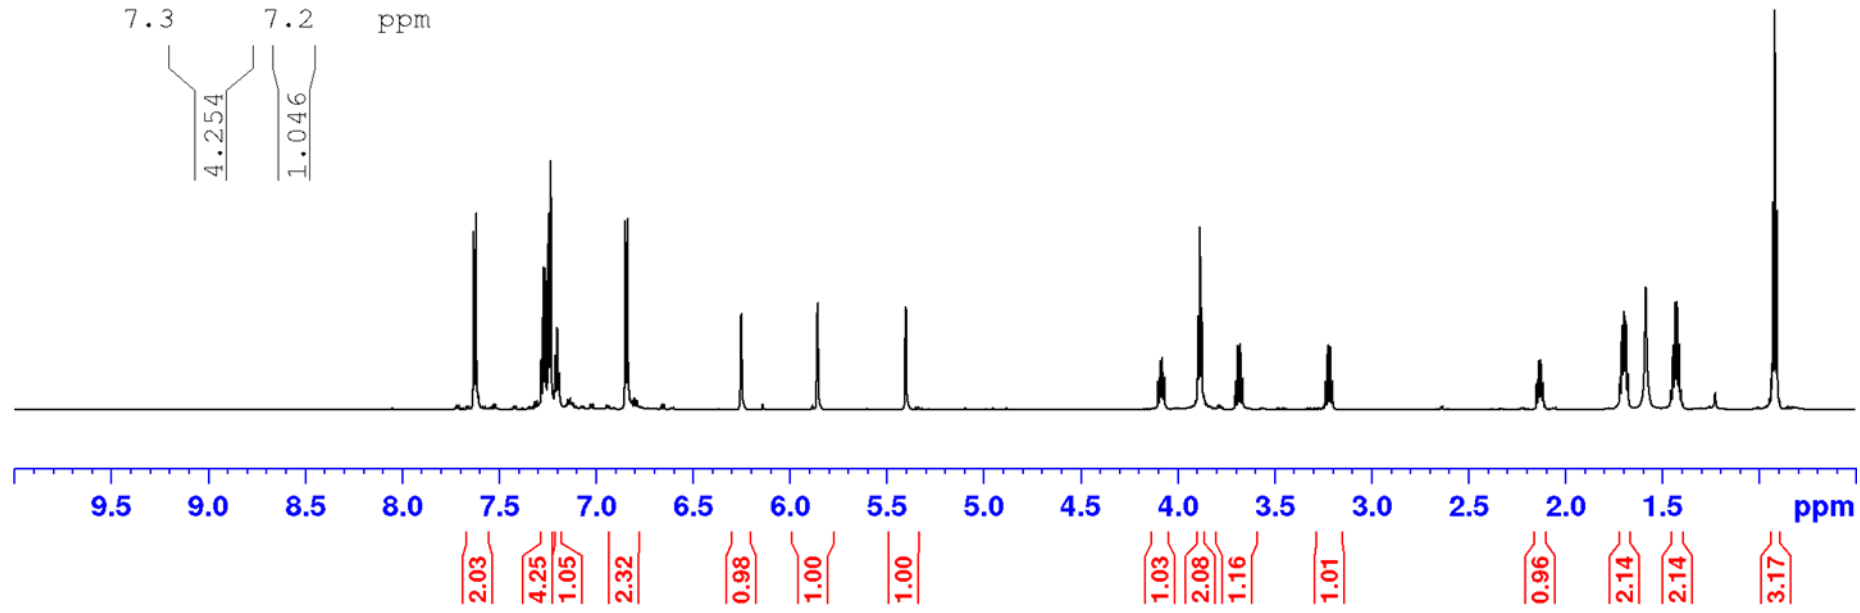

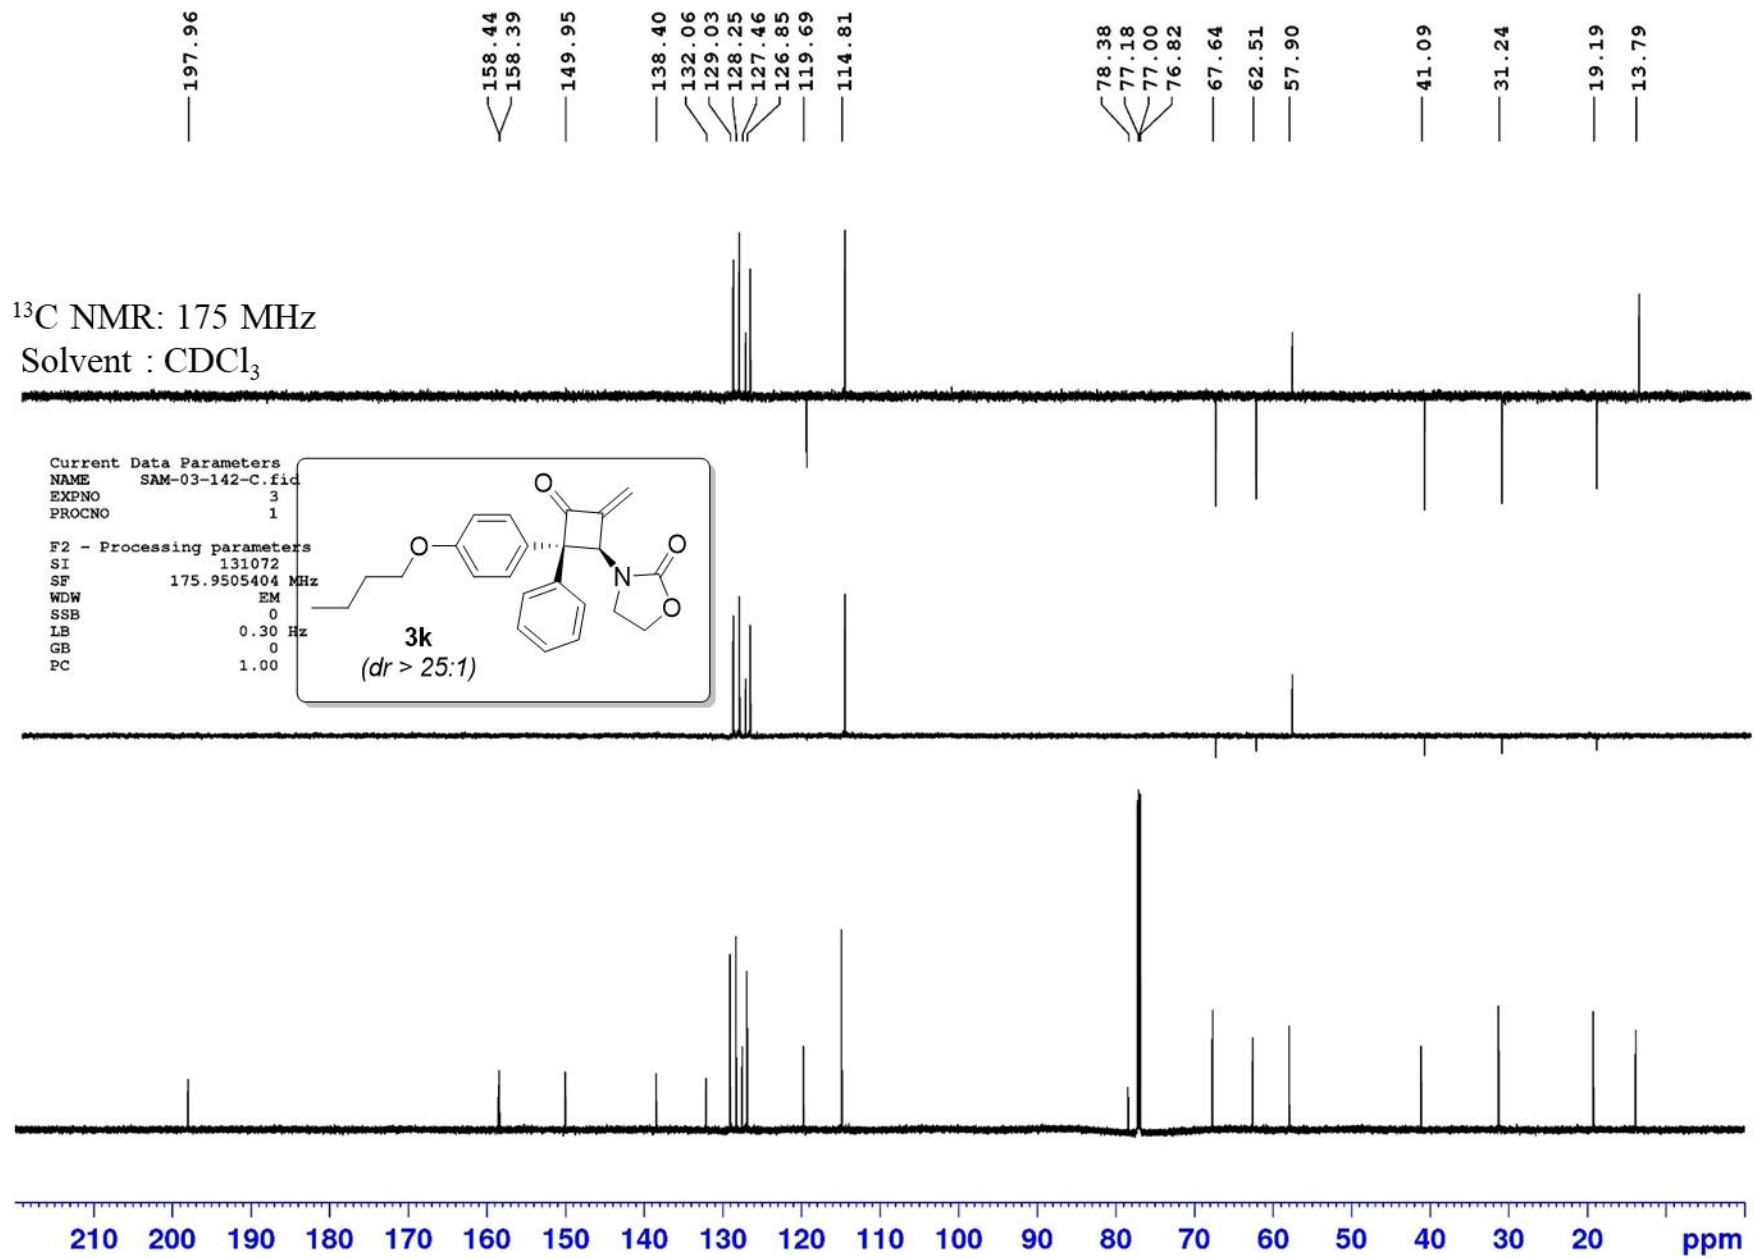

<sup>1</sup>H NMR: 700 MHz  
Solvent : CDCl<sub>3</sub>

7.719  
7.708  
7.345  
7.334  
7.323  
7.276  
7.264  
7.240  
7.236  
7.224  
7.214

6.291  
5.915  
5.458

4.177  
4.169  
4.164  
4.156  
4.152  
4.144  
3.836  
3.823  
3.812  
3.799  
3.314  
3.302  
3.290  
3.277

2.282  
2.274  
2.269  
2.261  
2.257  
2.249  
1.590

7.345  
7.334  
7.323  
7.276  
7.264  
7.240  
7.236  
7.224  
7.214

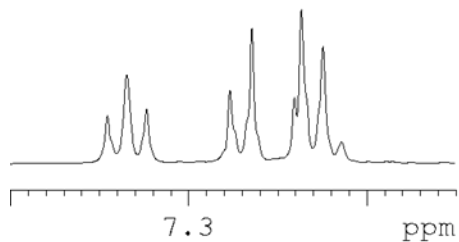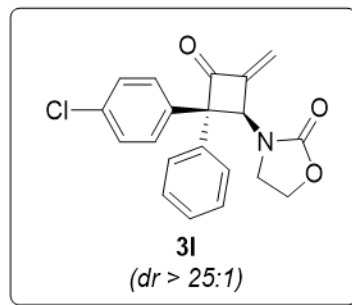

Current Data Parameters  
NAME SAM-03-130-H.fid  
EXPNO 1  
PROCNO 1  
  
F2 - Processing parameters  
SI 65536  
SF 699.7430960 MHz  
WDW EM  
SSB 0  
LB 0.30 Hz  
GB 0  
PC 1.00

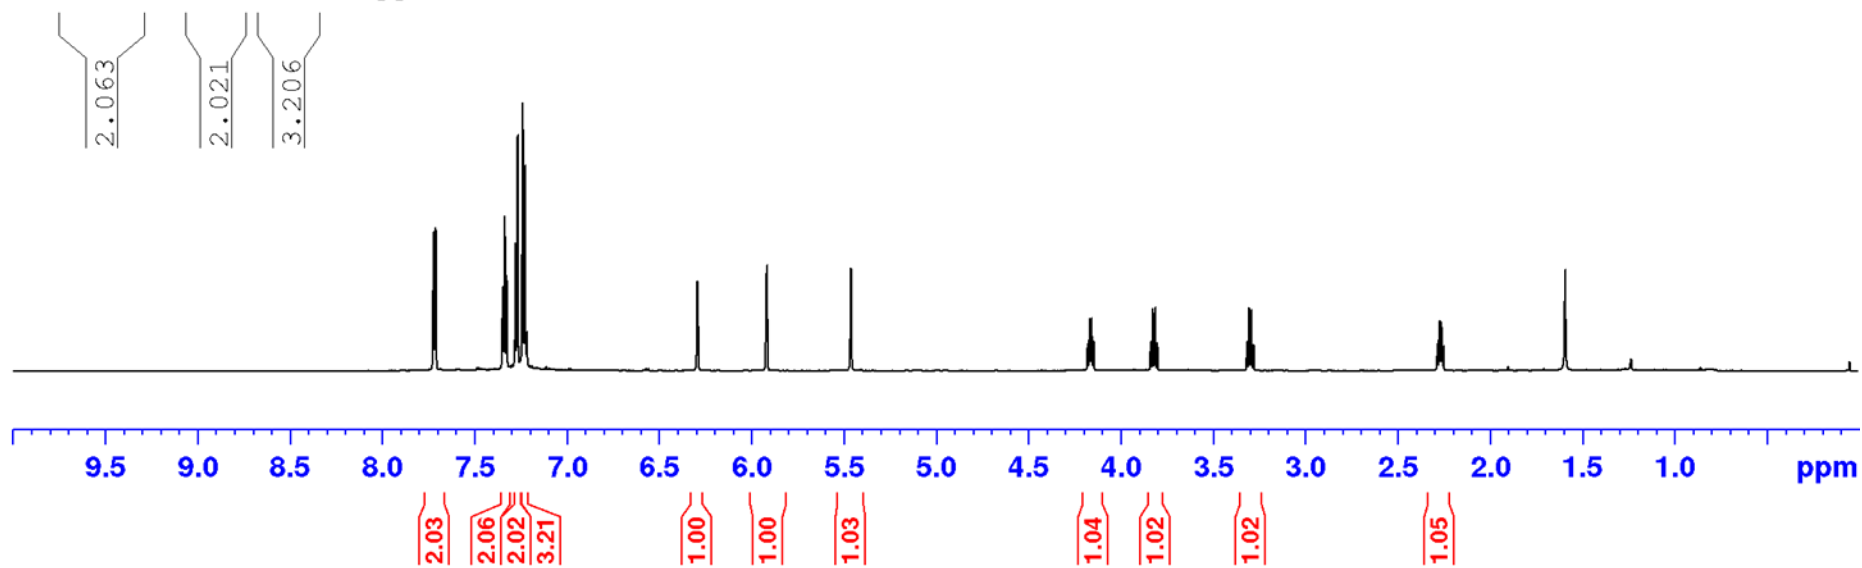

$^{13}\text{C}$  NMR: 175 MHz  
Solvent :  $\text{CDCl}_3$

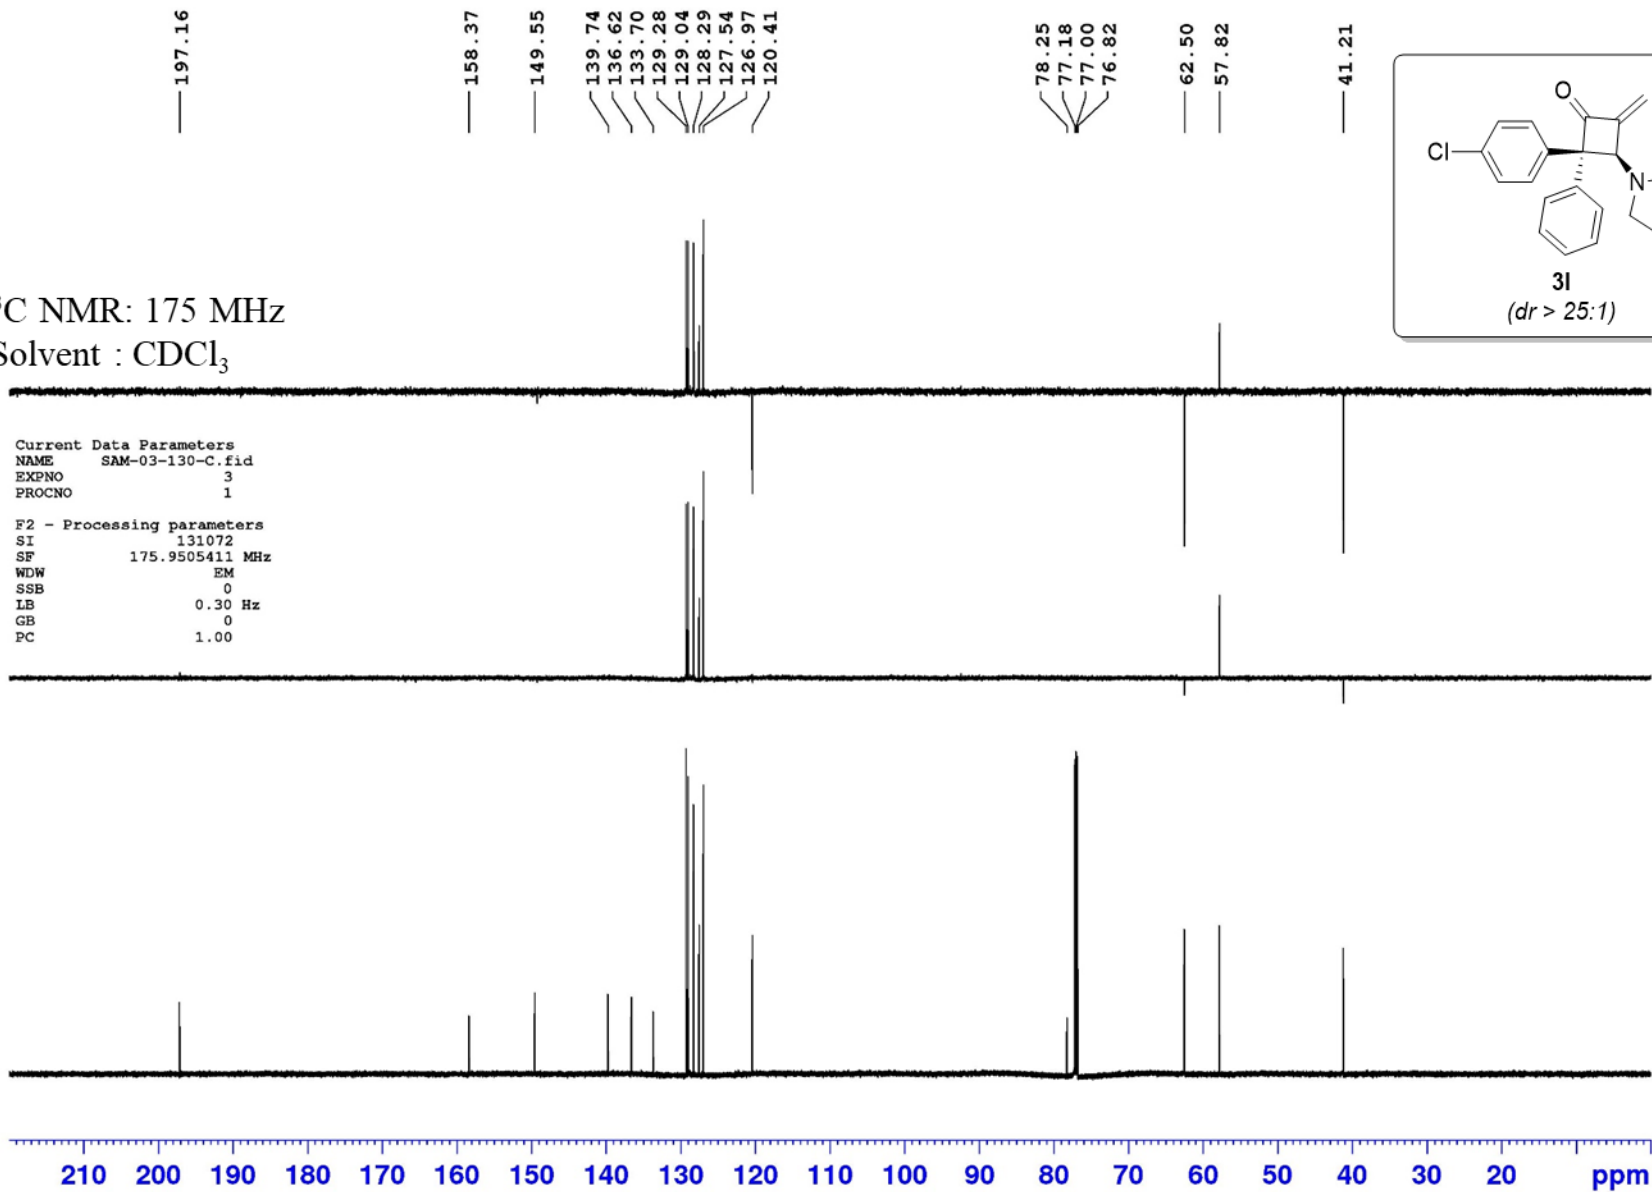

<sup>1</sup>H NMR: 700 MHz  
Solvent : CDCl<sub>3</sub>

7.755  
7.744  
7.743  
7.332  
7.321  
7.298  
7.287  
7.276  
7.267  
7.257  
7.240  
7.225  
7.217  
7.214  
7.207  
7.204  
7.203

6.268

5.925

5.420

4.117  
4.109  
4.104  
4.096  
4.092  
4.084  
3.722  
3.710  
3.698  
3.686  
3.254  
3.242  
3.230  
3.217

2.142  
2.134  
2.130  
2.122  
2.117  
2.109  
1.617

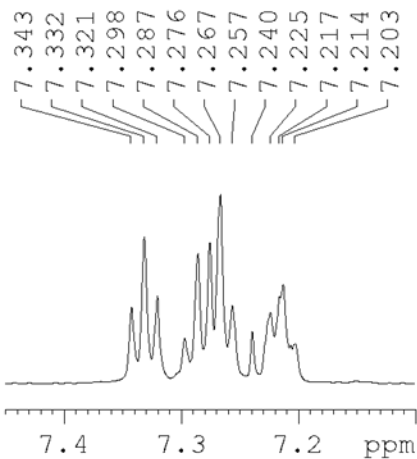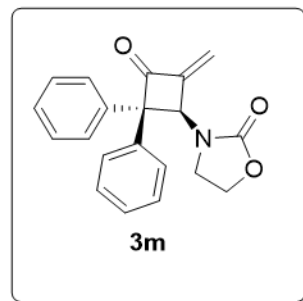

Current Data Parameters  
NAME SAM-03-129-H.fid  
EXPNO 1  
PROCNO 1

F2 - Processing parameters  
SI 65536  
SF 699.7431021 MHz  
WDW EM  
SSB 0  
LB 0.30 Hz  
GB 0  
PC 1.00

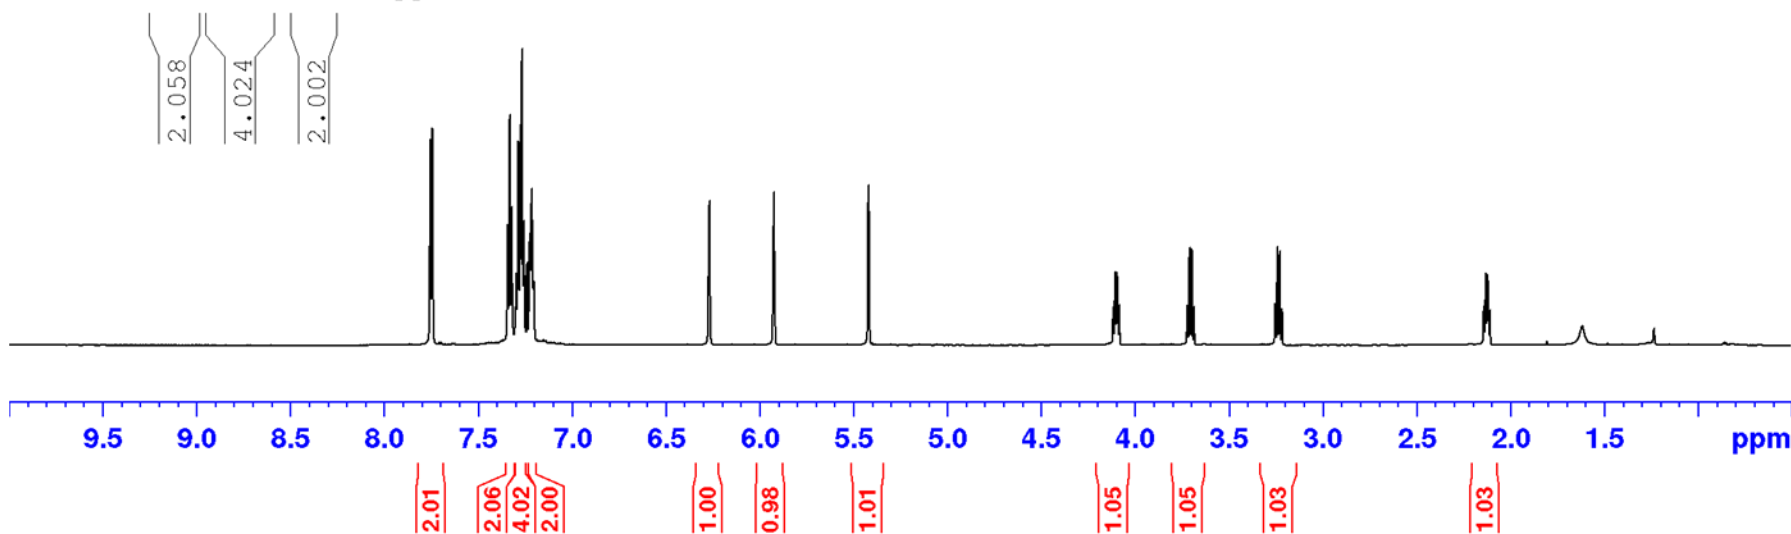

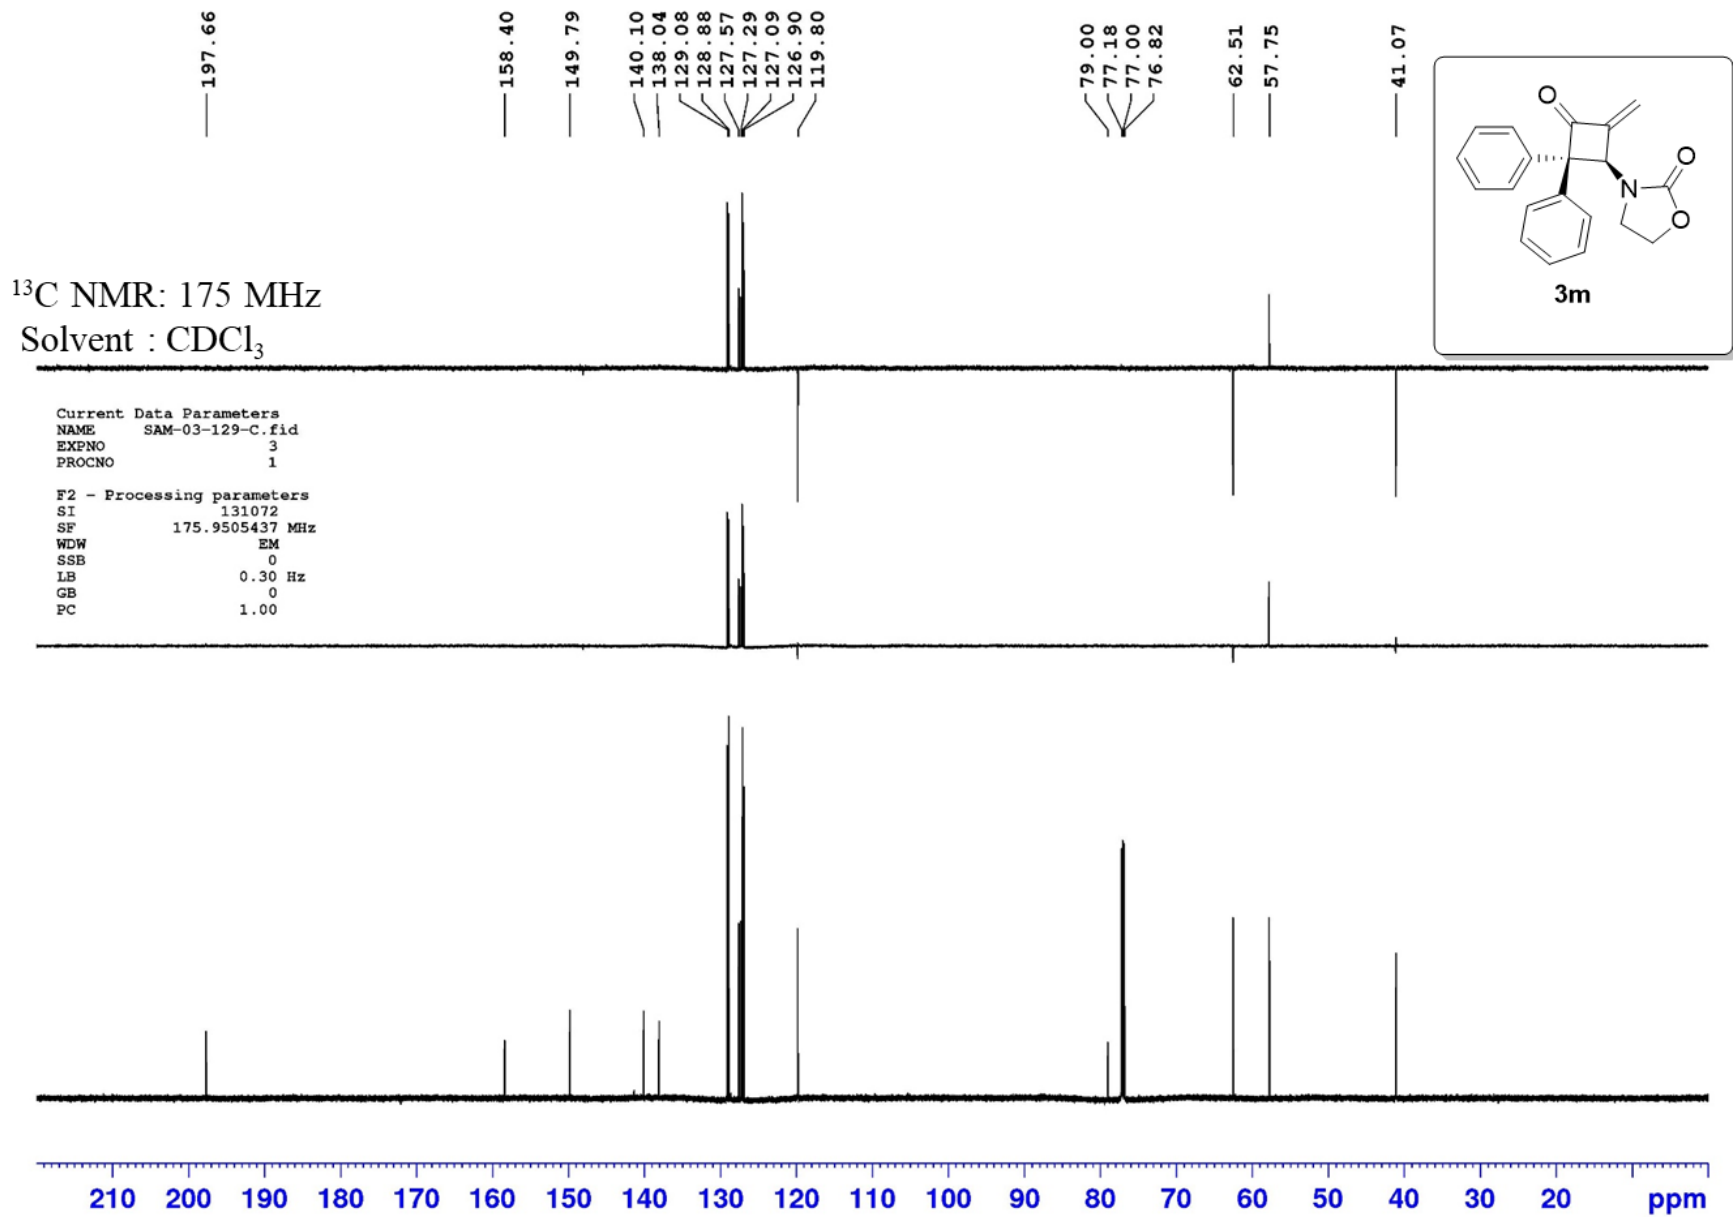

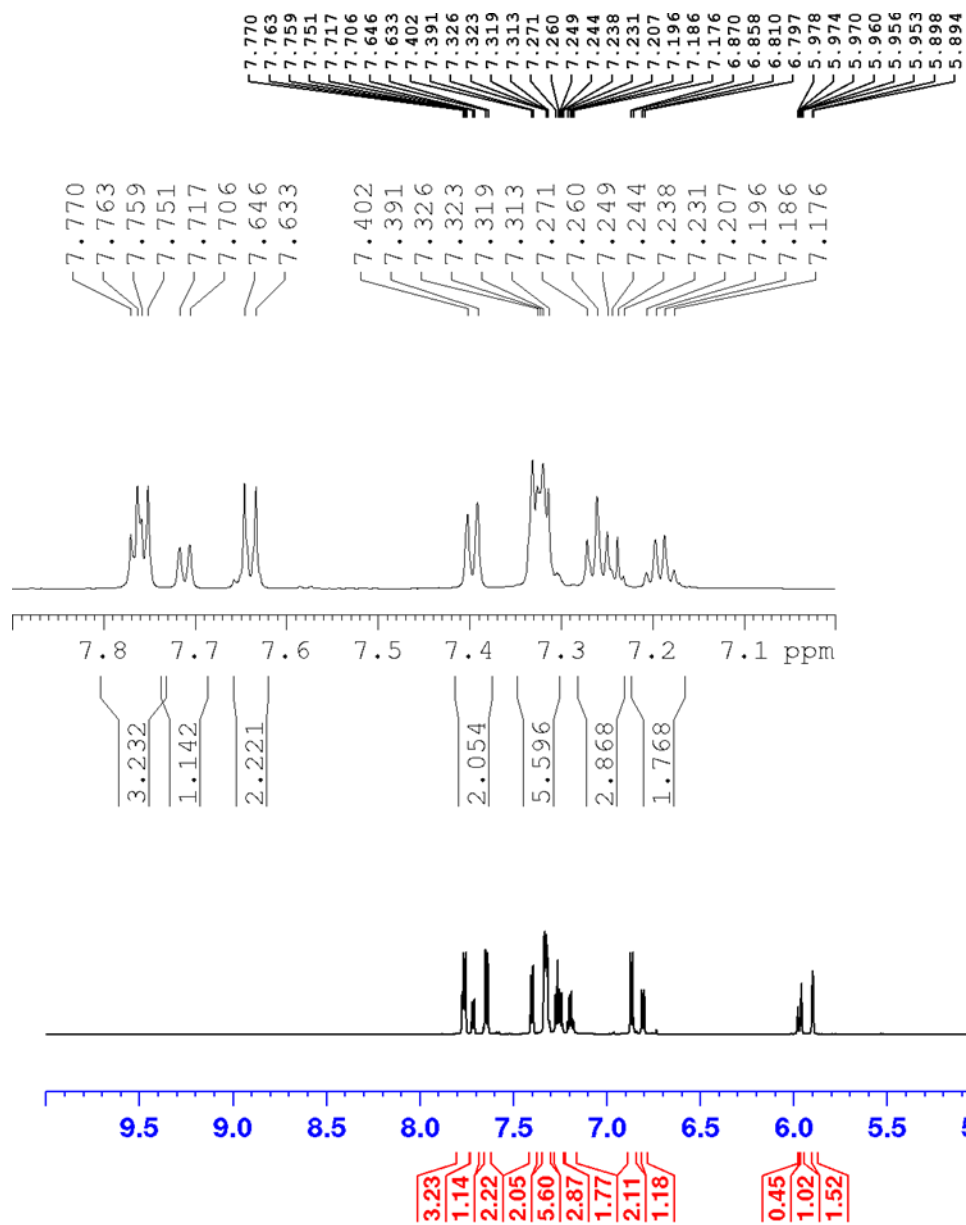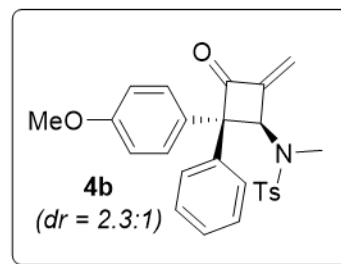

<sup>1</sup>H NMR: 700 MHz  
Solvent : CDCl<sub>3</sub>

Current Data Parameters  
 NAME 1  
 EXPNO 1  
 PROCNO 1

F2 - Processing parameters  
 SI 65536  
 SF 699.7431022 MHz  
 WDW EM  
 SSB 0  
 LB 0.30 Hz  
 GB 0  
 PC 1.00

198.03  
197.99

158.77  
158.66  
149.85  
149.83  
143.95  
143.94  
141.98  
138.02  
135.92  
135.87  
133.88  
129.99  
129.72  
128.90  
128.80  
128.27  
127.72  
127.22  
127.14  
127.11  
127.04  
126.43  
119.05  
119.04  
114.30  
114.27

77.21  
77.03  
76.94  
76.85

61.98  
61.67  
55.26  
55.17

31.05  
30.93  
21.56

198.032  
197.991

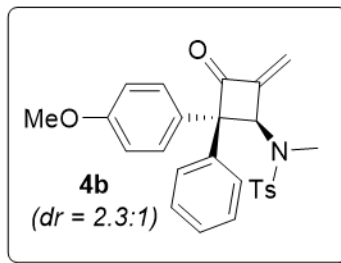

<sup>13</sup>C NMR: 175 MHz  
Solvent : CDCl<sub>3</sub>

Current Data Parameters  
NAME SAM-03-153-C.fid  
EXPNO 1  
PROCNO 1

F2 - Processing parameters  
SI 131072  
SF 175.9505381 MHz  
WDW EM  
SSB 0  
LB 0.30 Hz  
GB 0  
PC 1.00

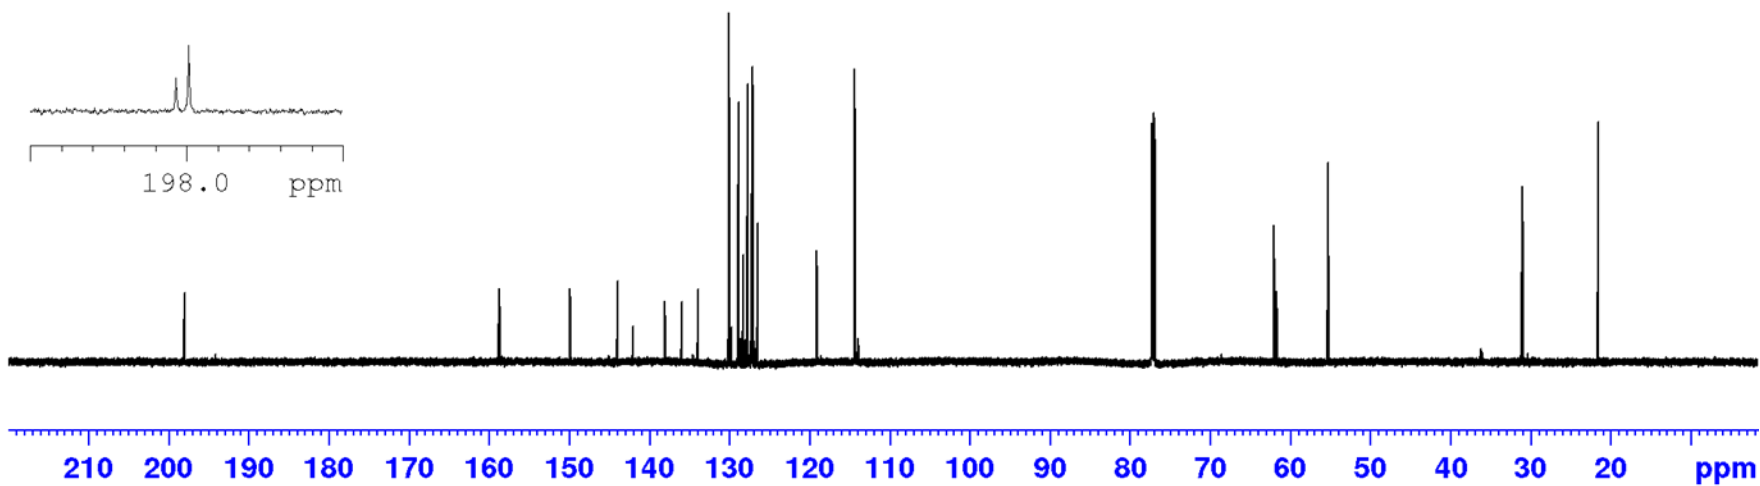



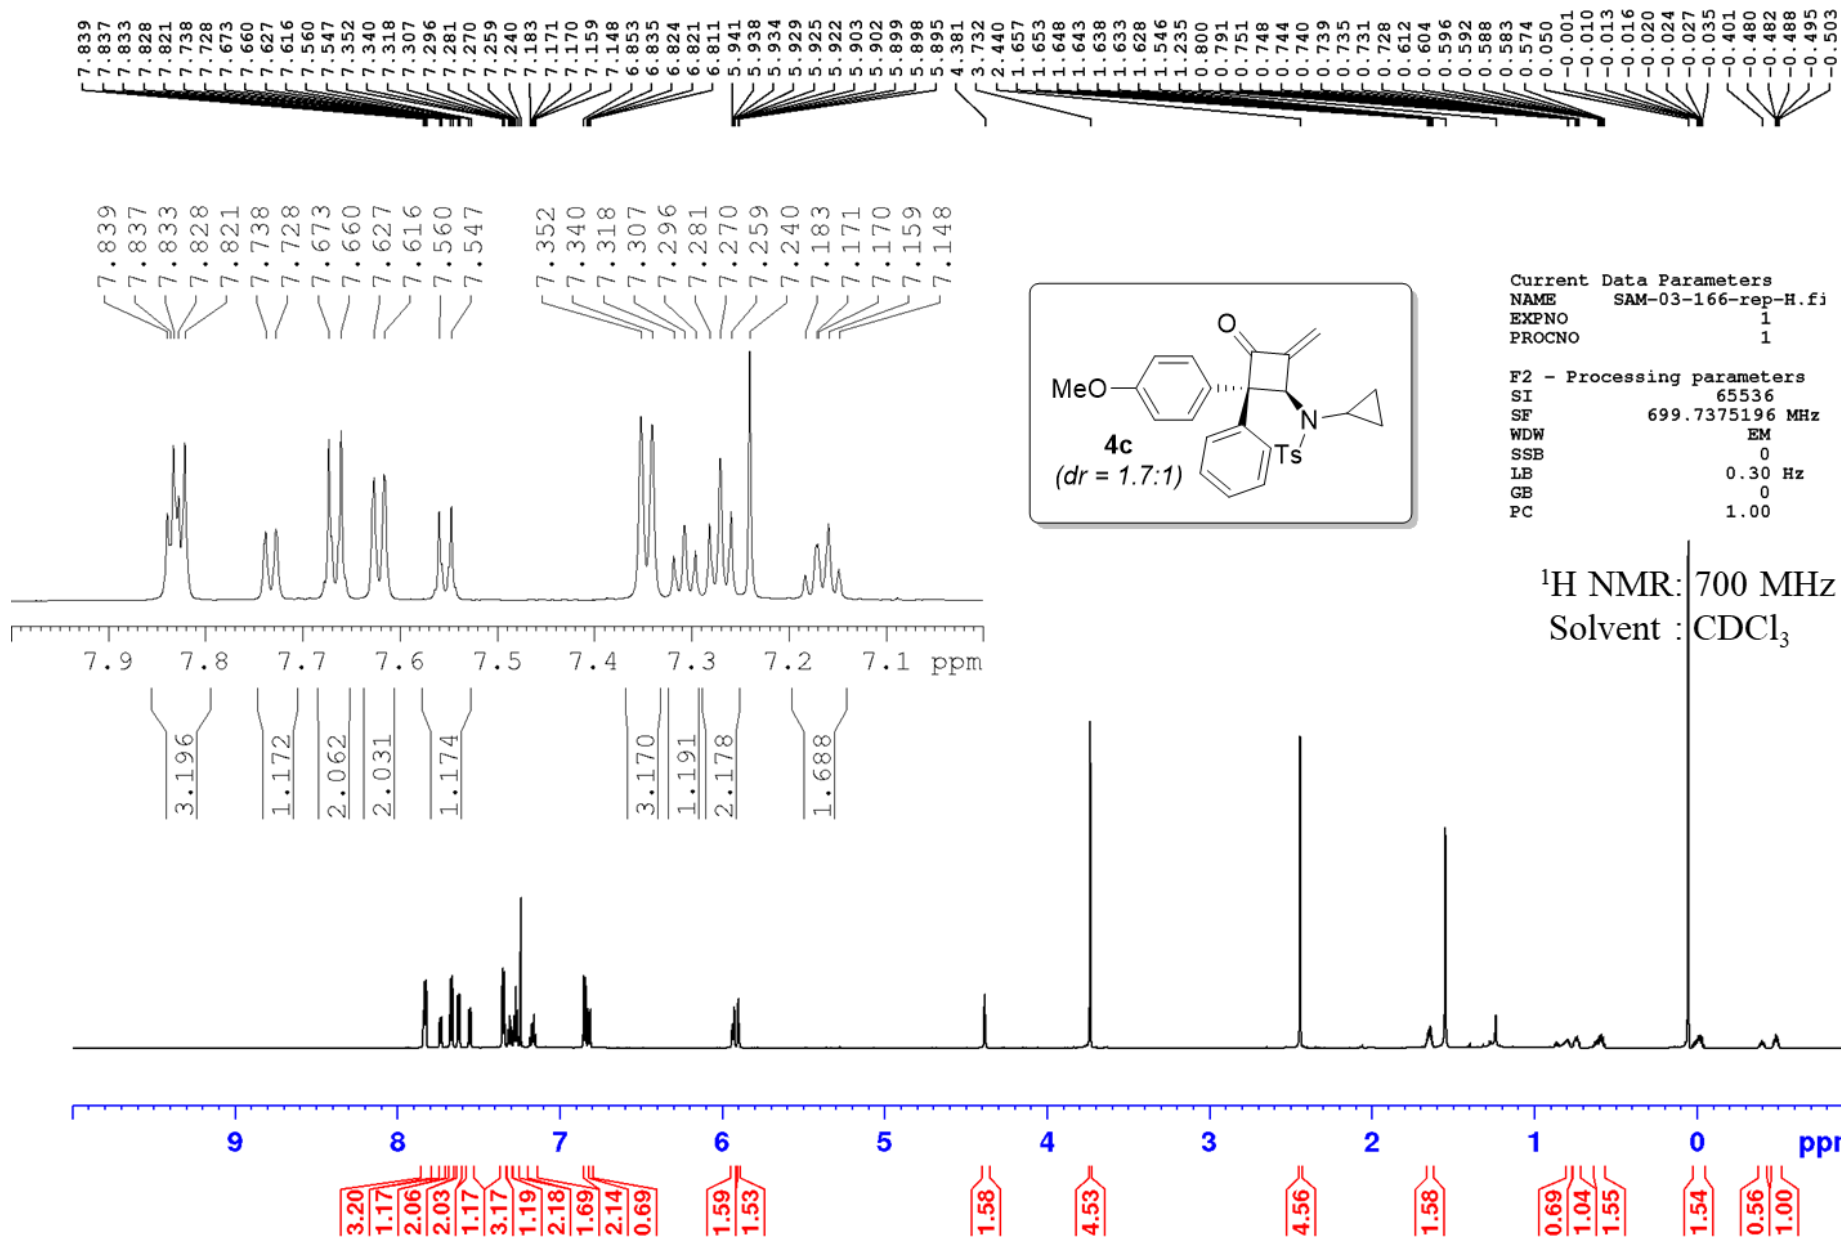

197.863  
197.701

158.609  
158.450  
149.699  
149.676  
144.047  
142.749  
139.766  
135.157  
135.124  
134.539  
131.668  
129.828  
129.055  
128.397  
128.347  
127.690  
127.581  
127.099  
126.968  
126.891  
126.382  
118.646  
118.607  
114.454  
113.83E

77.407  
77.177  
76.995  
76.814

65.321  
65.113

55.232  
55.142

29.734  
29.578

21.582

9.675  
9.518

Current Data Parameters  
NAME SAM-03-166-rep-C.fi  
EXPNO 1  
PROCNO 1

F2 - Processing parameters  
SI 131072  
SF 175.9505395 MHz  
WDW EM  
SSB 0  
LB 0.30 Hz  
GB 0  
PC 1.00

197.863  
197.701

<sup>13</sup>C NMR: 175 MHz  
Solvent : CDCl<sub>3</sub>

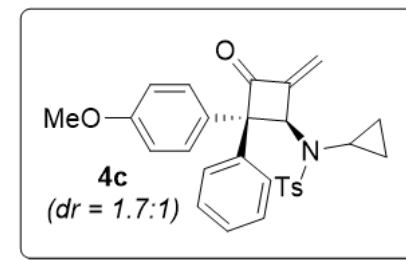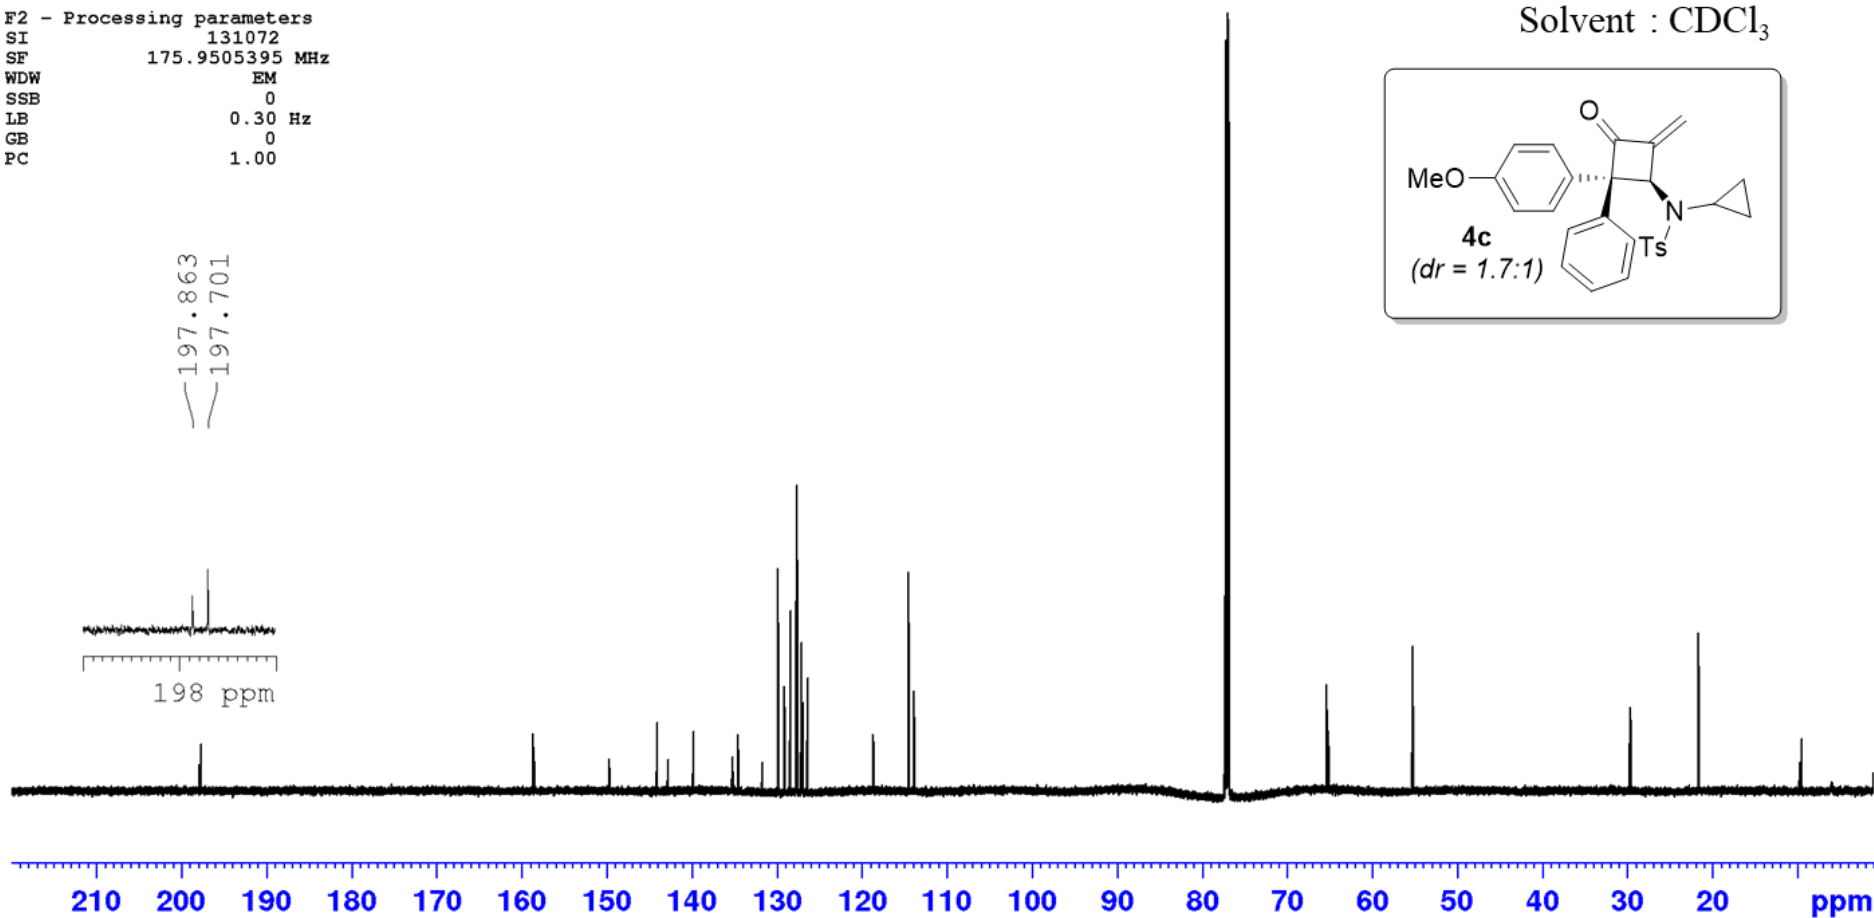

<sup>1</sup>H NMR: 700 MHz  
Solvent : CDCl<sub>3</sub>

7.824  
7.469  
7.457  
7.337  
7.326  
7.317  
7.305  
7.286  
7.266  
7.255  
7.247  
7.244  
7.186  
7.175  
7.165  
6.829  
6.816

6.046

5.714

4.922

3.744  
2.505  
2.490  
2.474  
2.457  
2.435  
1.869  
1.864  
1.852  
1.847  
1.834  
1.830  
1.817  
1.665  
1.660  
1.647  
1.643  
1.629  
1.625  
1.611  
1.599  
1.577  
1.482  
1.410  
1.390  
1.373  
1.294  
1.275  
1.244  
0.983  
0.978  
0.965

7.469  
7.457  
7.337  
7.326  
7.317  
7.305  
7.286  
7.266  
7.255  
7.247  
7.244  
7.186  
7.175  
7.165

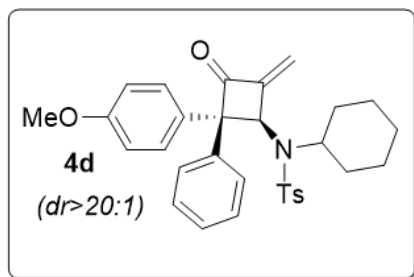

Current Data Parameters  
NAME AK-02-19-AP-H.fid  
EXPNO 1  
PROCNO 1

F2 - Processing parameters  
SI 65536  
SF 699.7430945 MHz  
WDW EM  
SSB 0  
LB 0.30 Hz  
GB 0  
PC 1.00

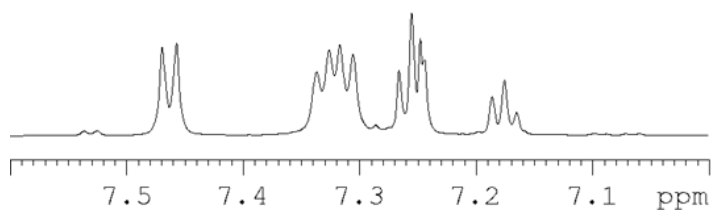

2.079  
4.244  
2.423  
1.182

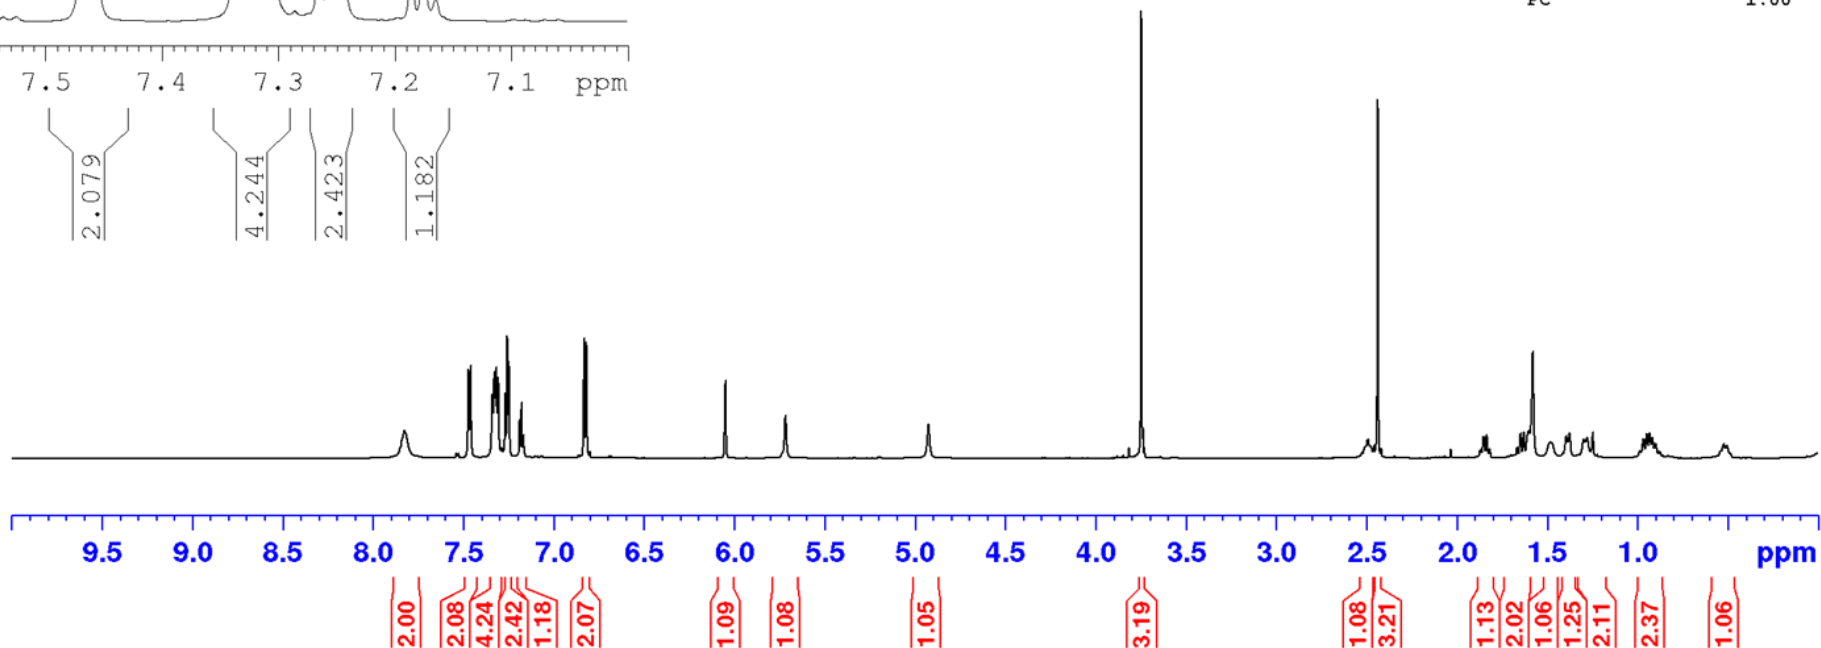

— 194.58

— 158.67

— 152.28

— 143.42

— 139.15

— 133.77

— 129.64

— 128.66

— 128.07

— 127.73

— 119.59

— 114.27

— 78.32

— 77.18

— 77.00

— 76.82

— 63.56

— 62.14

— 55.23

— 32.61

— 32.20

— 28.88

— 27.16

— 26.69

— 25.23

— 21.51

$^{13}\text{C}$  NMR: 175 MHz

Solvent :  $\text{CDCl}_3$

Current Data Parameters  
NAME AK-02-19-AP-C.fid  
EXPNO 1  
PROCNO 1

F2 - Processing parameters  
SI 131072  
SF 175.9273942 MHz  
WDW EM  
SSB 0  
LB 0.30 Hz  
GB 0  
PC 1.00

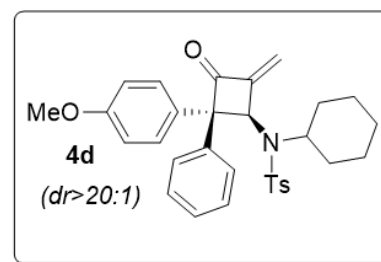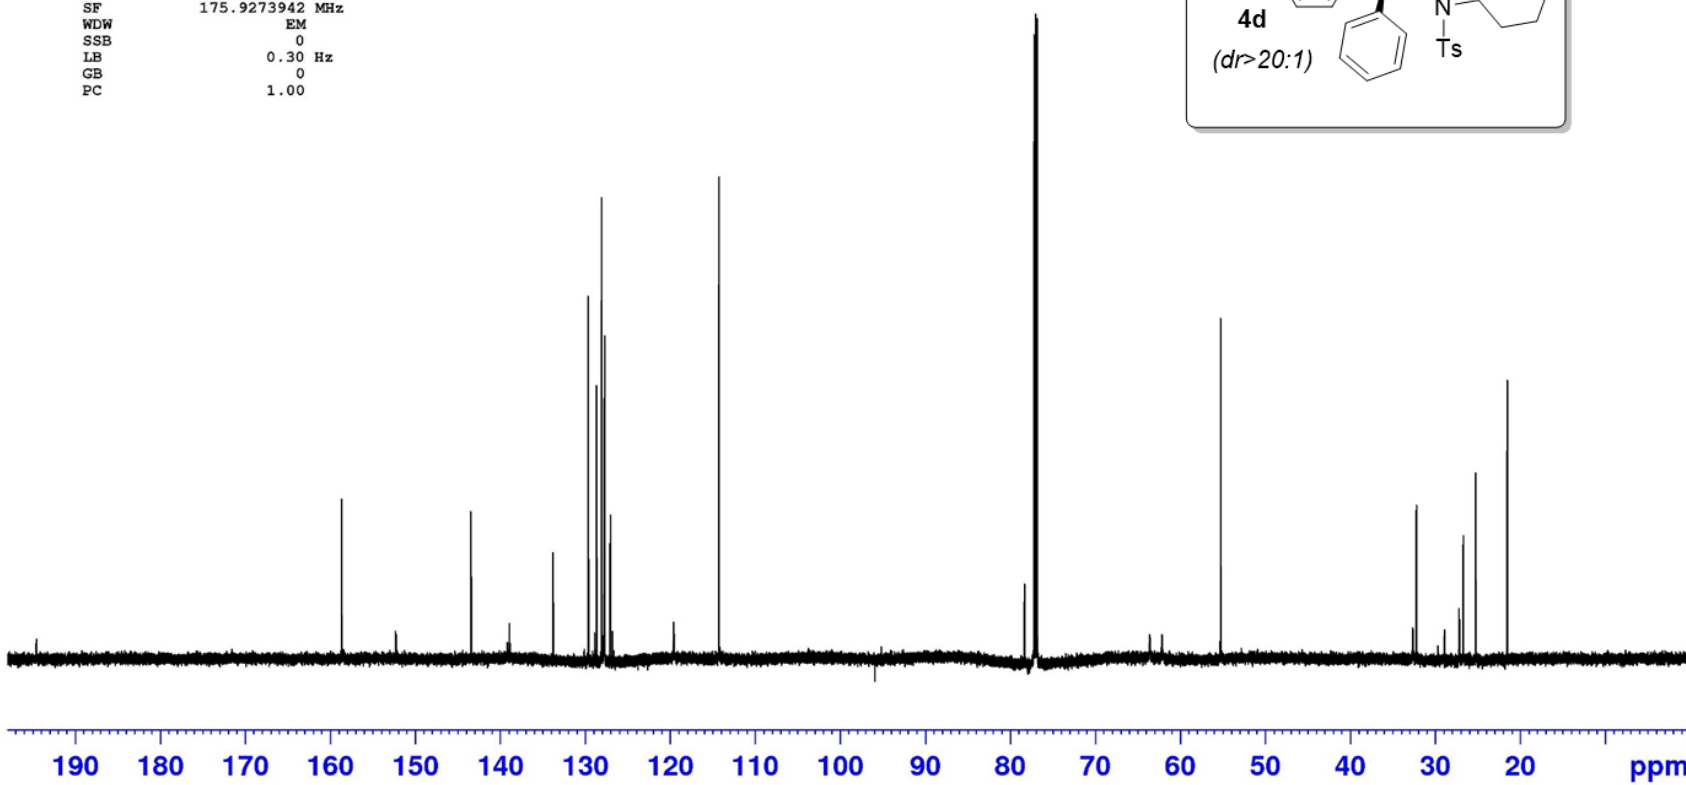

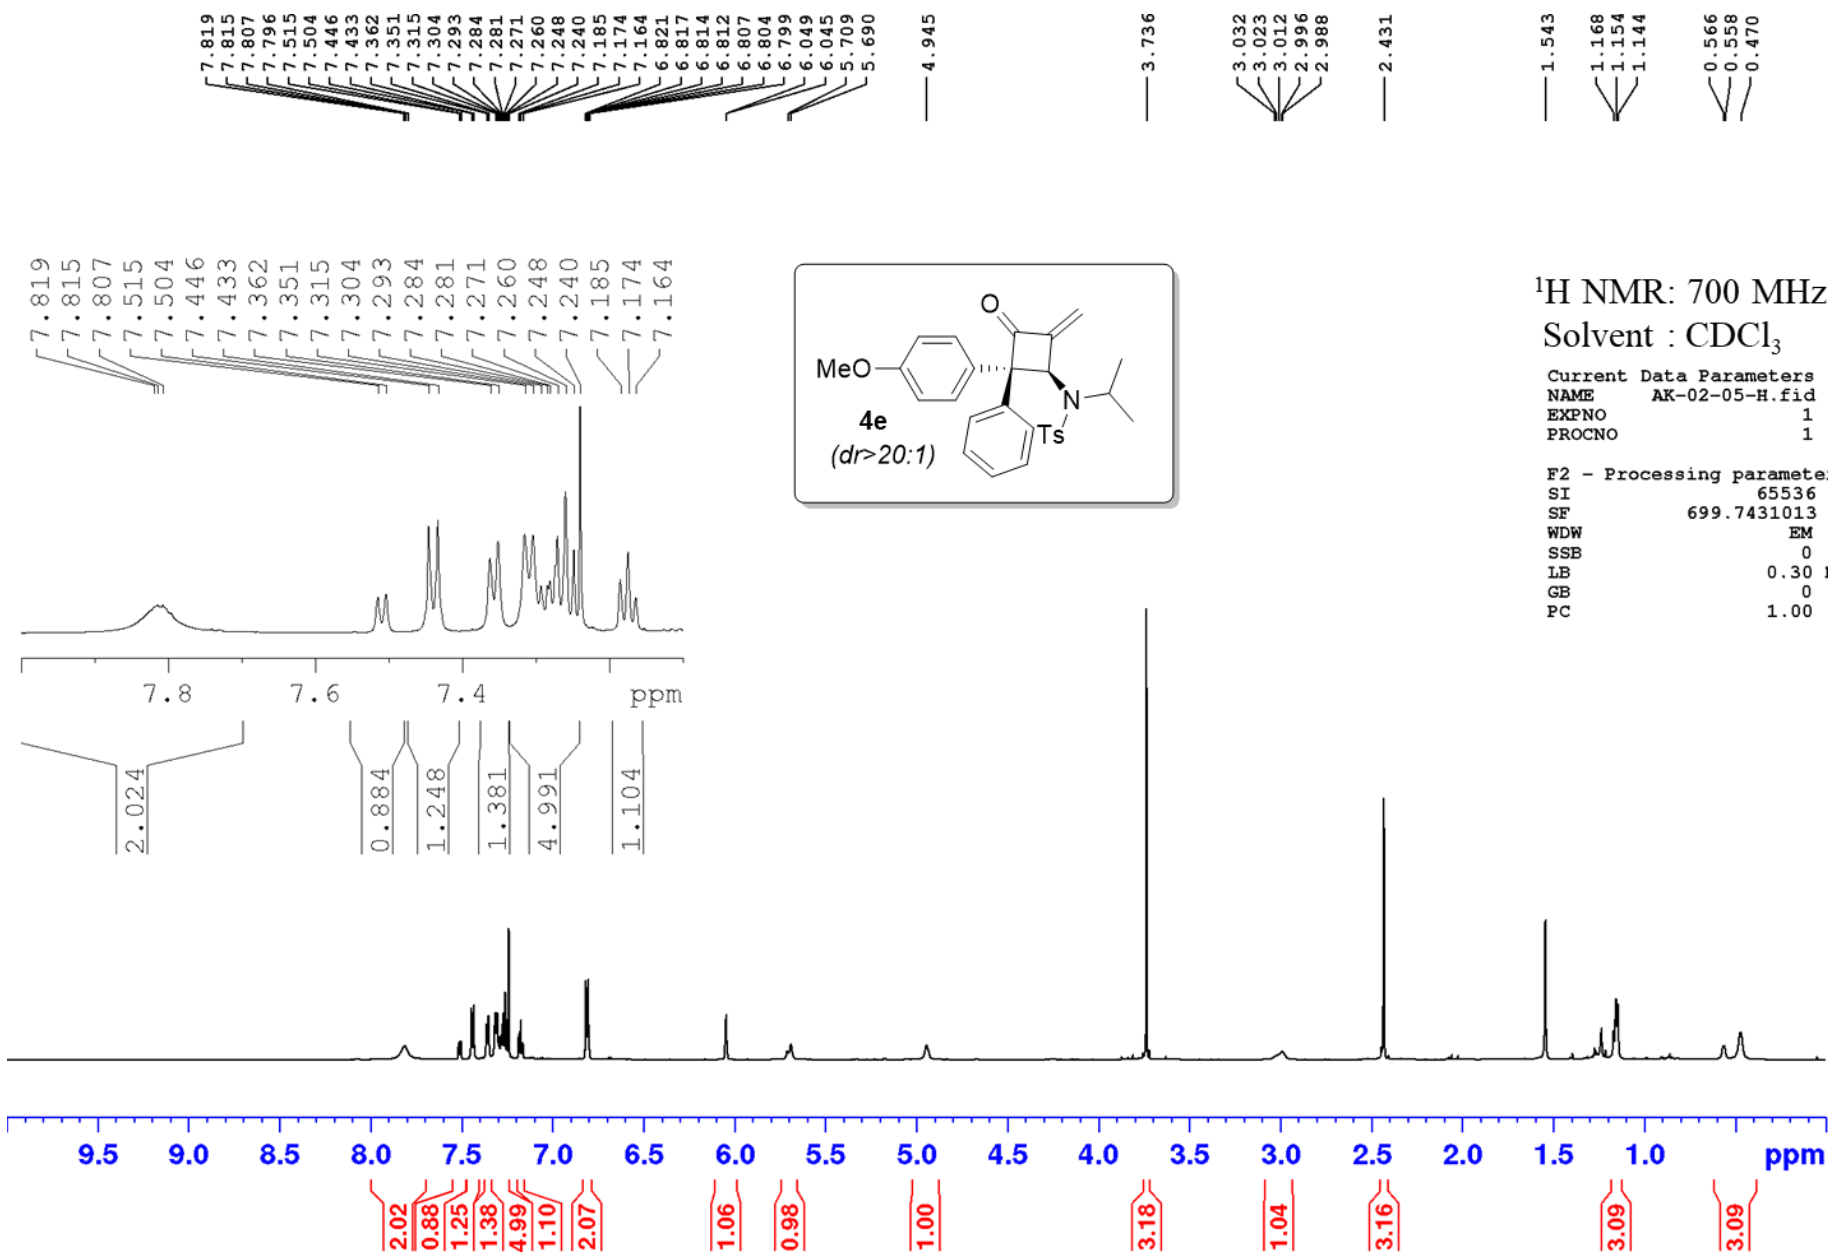

198.85  
198.59

158.60  
152.07  
143.46  
141.91  
138.84  
133.71  
130.82  
129.60  
129.04  
128.83  
128.58  
127.91  
127.80  
127.66  
127.06  
127.02  
126.63  
119.61  
114.22  
114.03

78.32  
78.08  
77.18  
77.00  
76.82

63.58

55.15  
53.05

22.22  
22.00  
21.44

$^{13}\text{C}$  NMR: 175 MHz  
Solvent :  $\text{CDCl}_3$

AK-02-203

Current Data Parameters  
NAME AK-02-203-C.fid  
EXPNO 3  
PROCNO 1

F2 - Processing parameters  
SI 131072  
SF 175.9505559 MHz  
WDW EM  
SSB 0  
LB 0.30 Hz  
GB 0  
PC 1.00

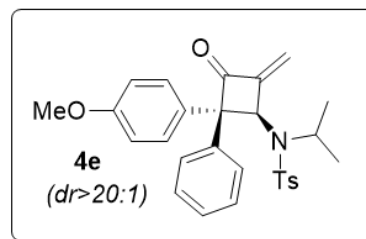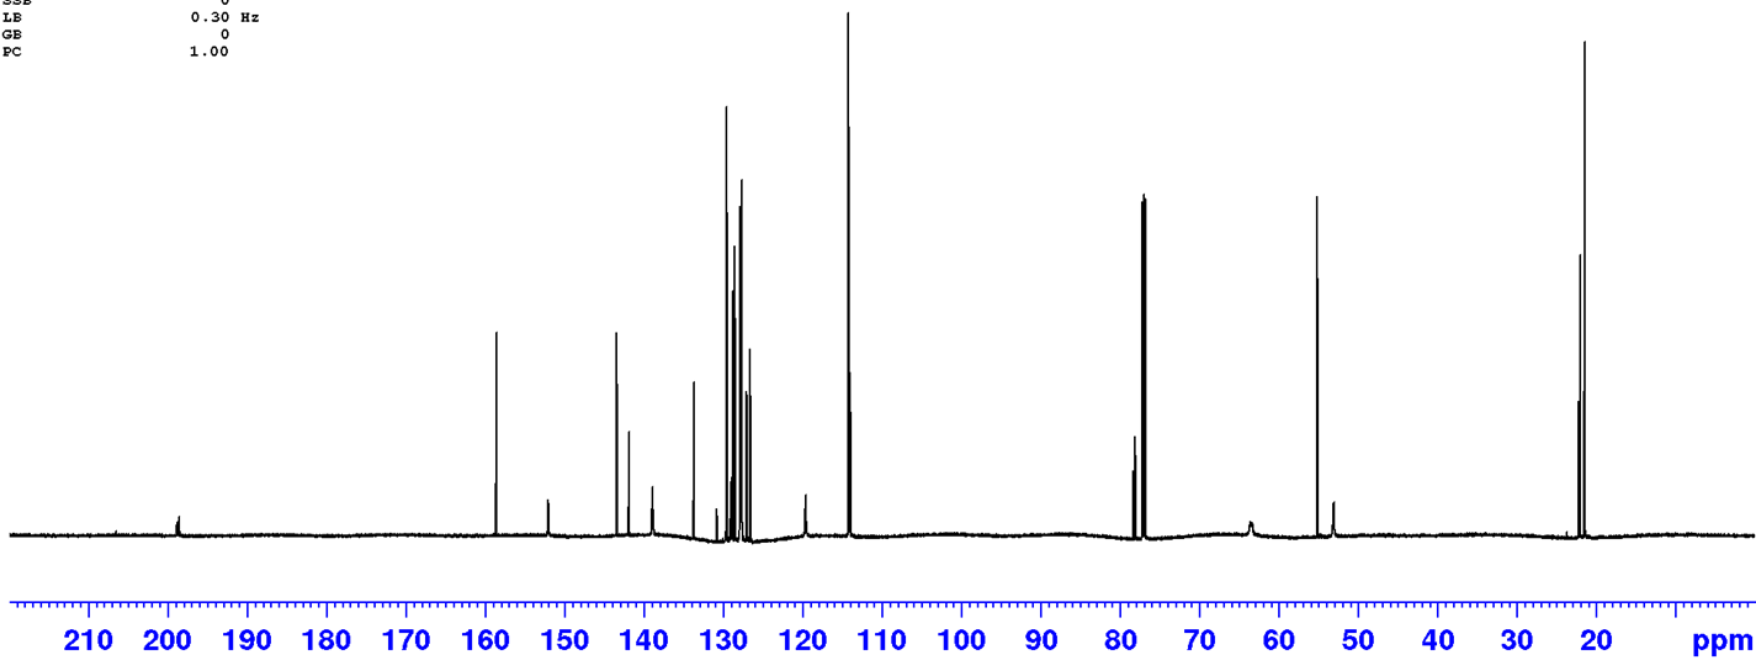

S102

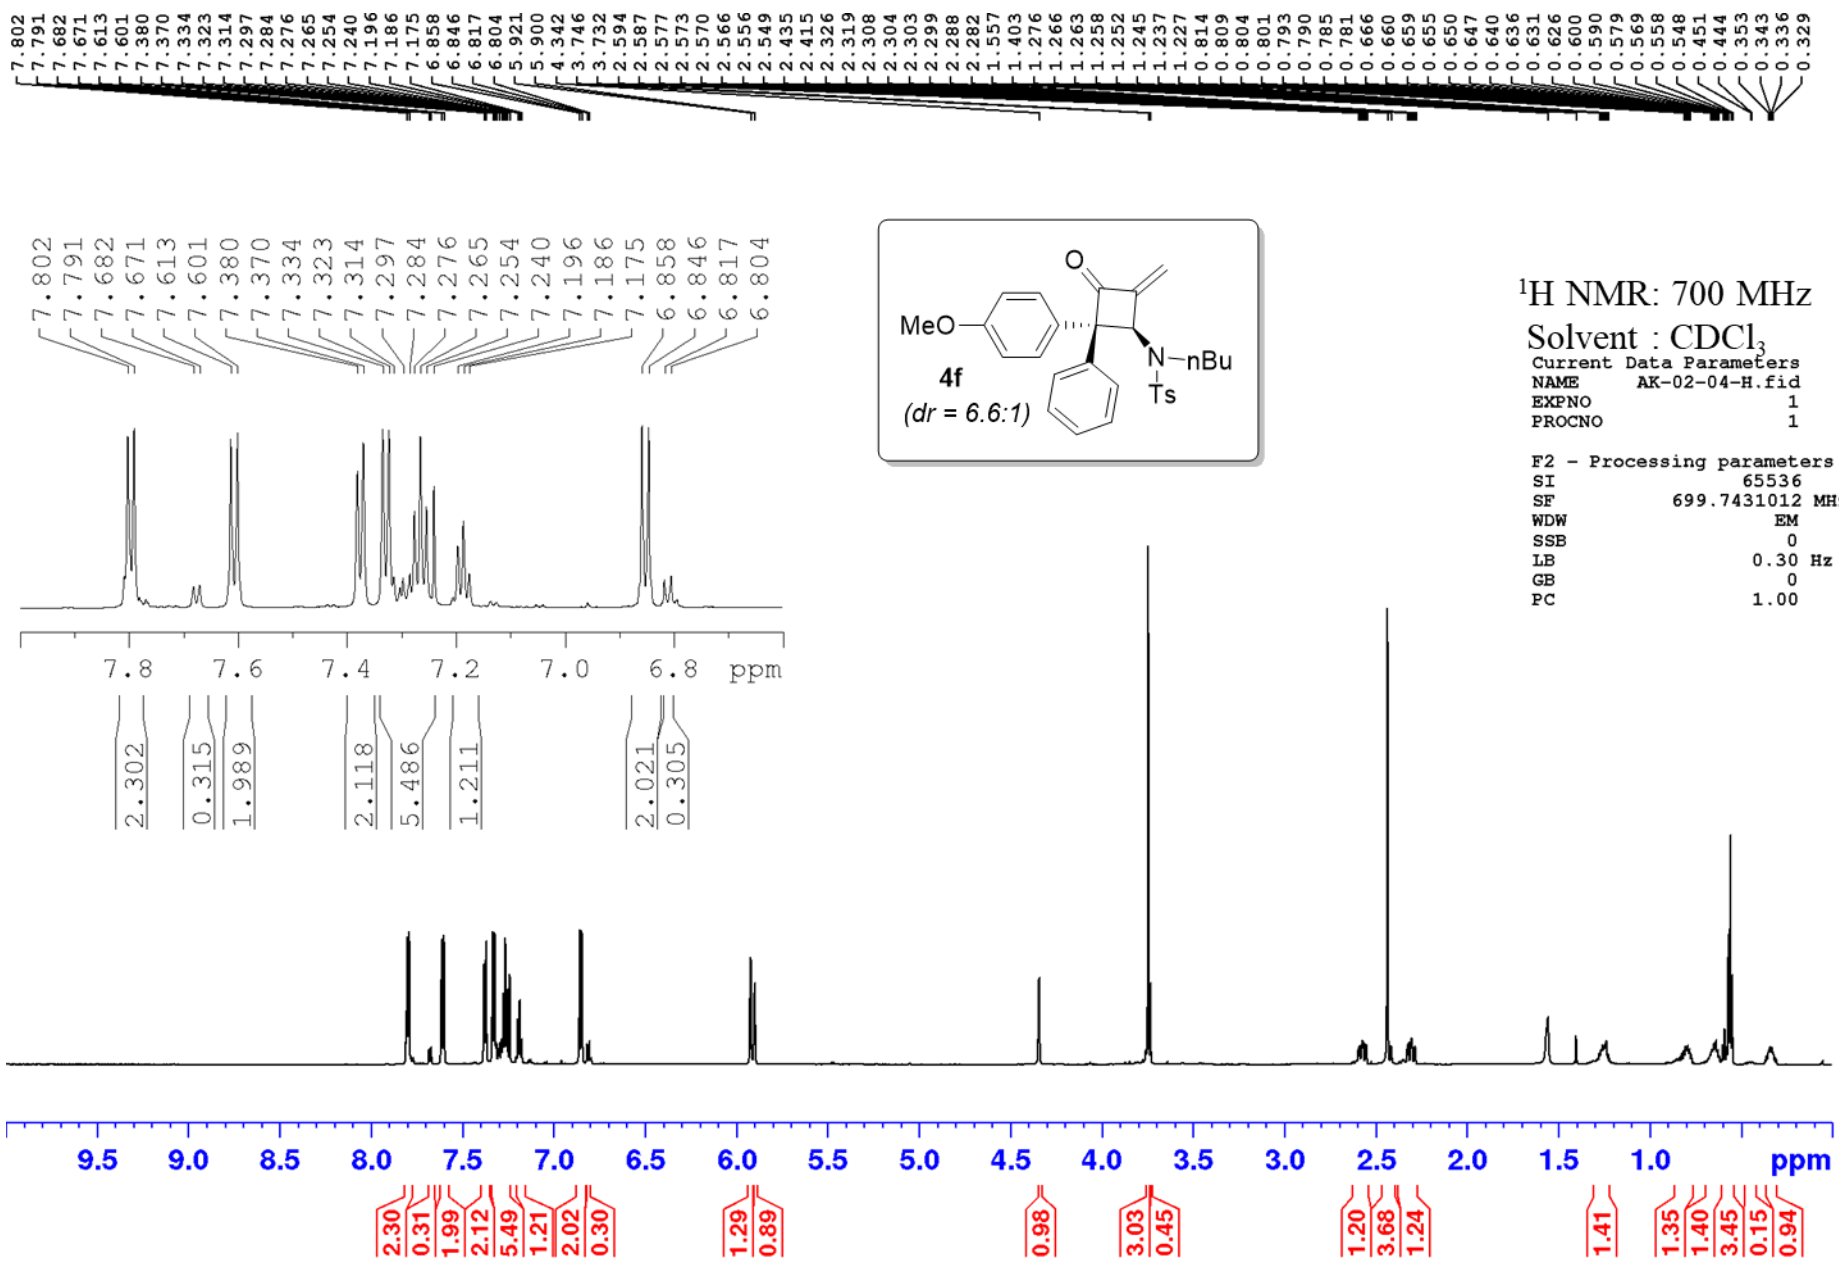

— 198.70  
 — 158.65  
 — 151.24  
 — 143.84  
 — 138.39  
 — 136.87  
 — 134.06  
 — 129.92  
 — 128.72  
 — 127.95  
 — 127.70  
 — 127.31  
 — 127.15  
 — 119.19  
 — 114.28

— 77.83  
 — 77.20  
 — 77.02  
 — 76.83  
 — 63.88  
 — 55.26  
 — 47.68  
 — 31.24  
 — 21.56  
 — 20.36  
 — 13.31

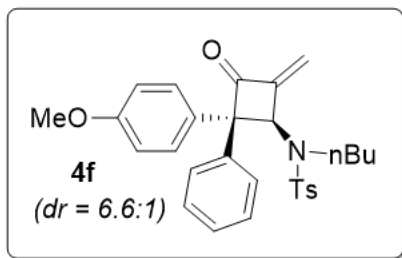

Current Data Parameters  
 NAME AK-02-04-C.fid  
 EXPNO 1  
 PROCNO 1  
  
 F2 - Processing parameters  
 SI 131072  
 SF 175.9505378 MHz  
 WDW EM  
 SSB 0  
 LB 0.30 Hz  
 GB 0  
 PC 1.00

<sup>13</sup>C NMR: 175 MHz  
 Solvent : CDCl<sub>3</sub>

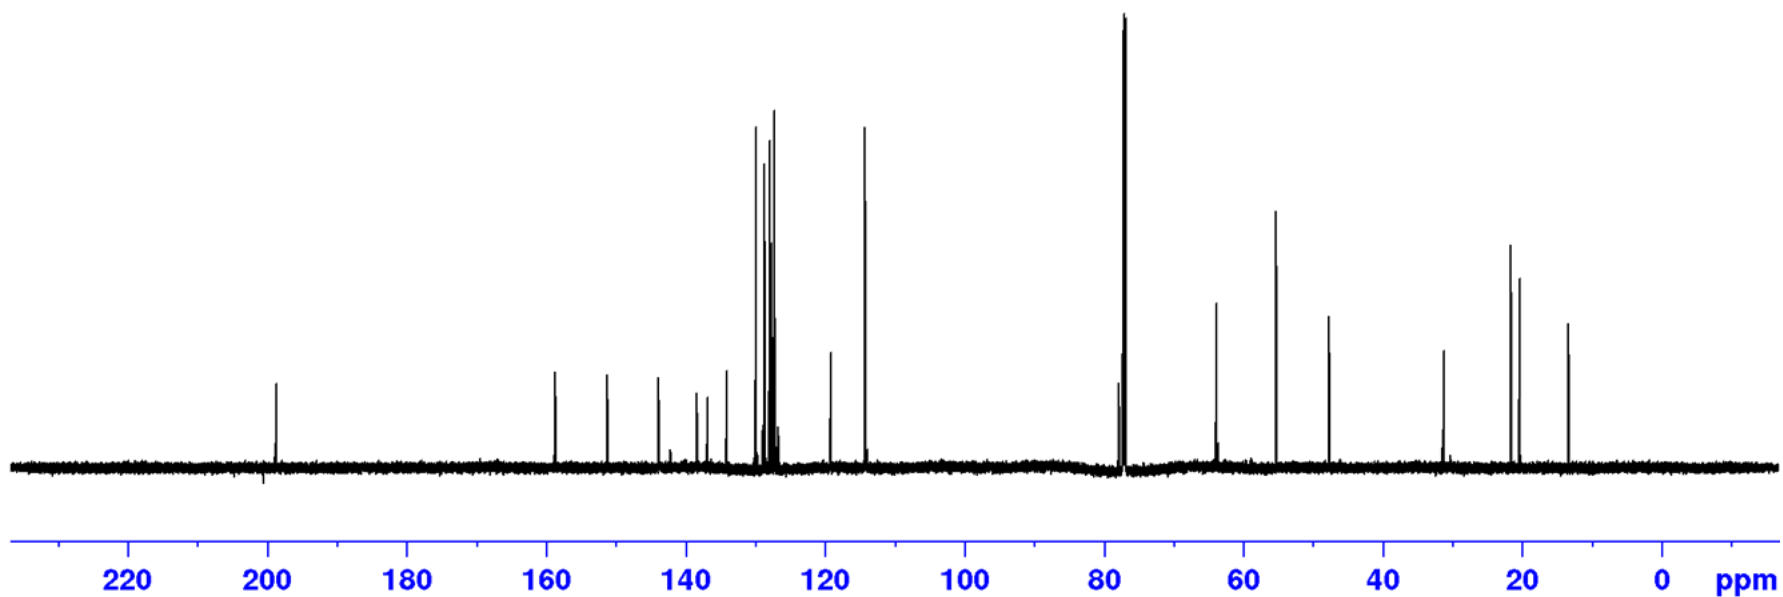

S104



<sup>1</sup>H NMR: 700 MHz  
Solvent : CDCl<sub>3</sub>

7.650  
7.639  
7.579  
7.566  
7.351  
7.340  
7.314  
7.303  
7.289  
7.277  
7.267  
7.262  
7.240  
7.215  
7.204  
7.196  
7.187  
6.848  
6.836  
6.824  
6.812  
6.274  
5.975  
5.955

5.317  
3.732  
2.934  
2.918  
2.173  
2.128  
1.595

7.650  
7.639  
7.579  
7.566  
7.351  
7.340  
7.314  
7.303  
7.289  
7.277  
7.267  
7.262  
7.240  
7.215  
7.204  
7.196  
7.187  
6.848  
6.836  
6.824  
6.812

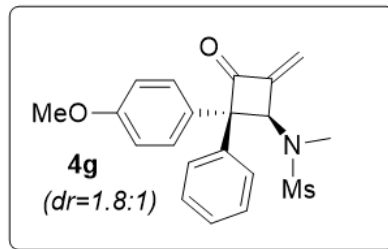

Current Data Parameters  
NAME AK-02-09-H.fid  
EXPNO 1  
PROCNO 1

F2 - Processing parameters  
SI 65536  
SF 699.7431050 MHz  
WDW EM  
SSB 0  
LB 0.30 Hz  
GB 0  
PC 1.00

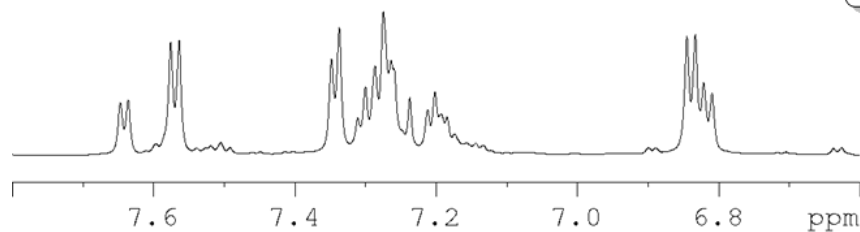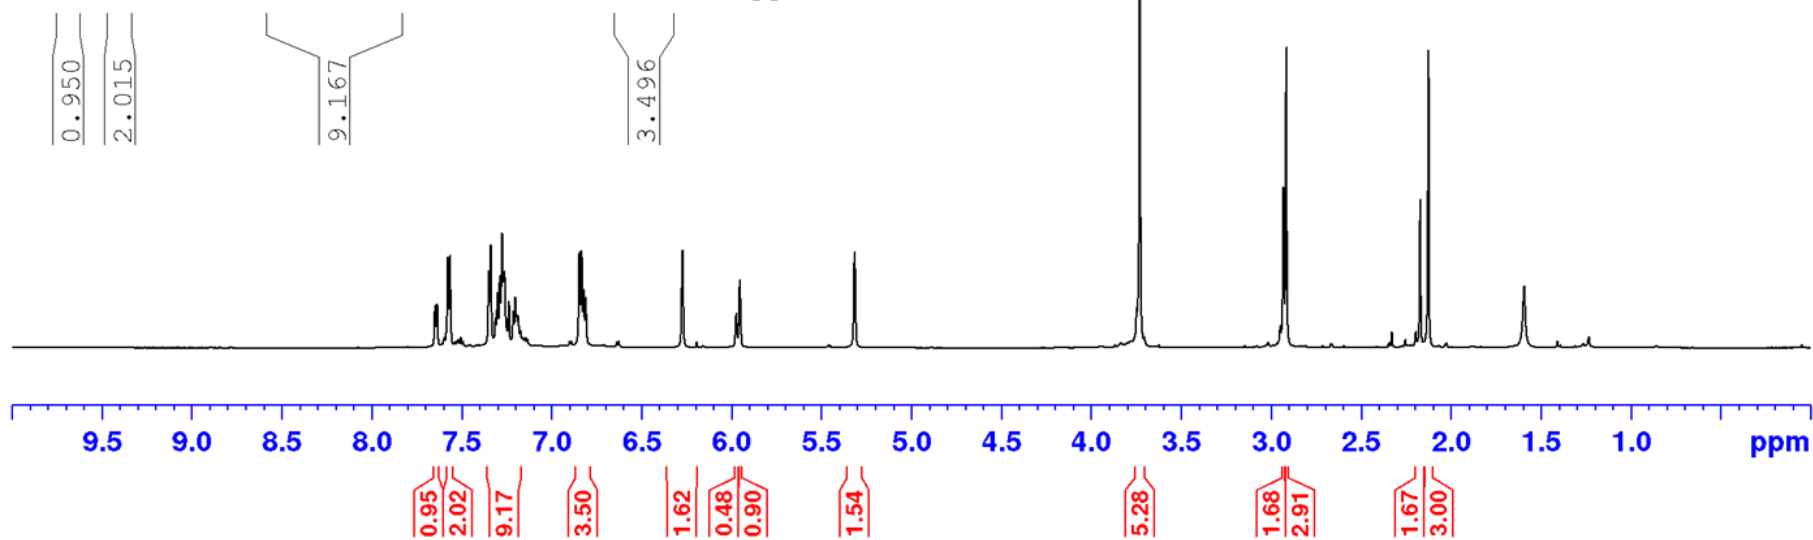

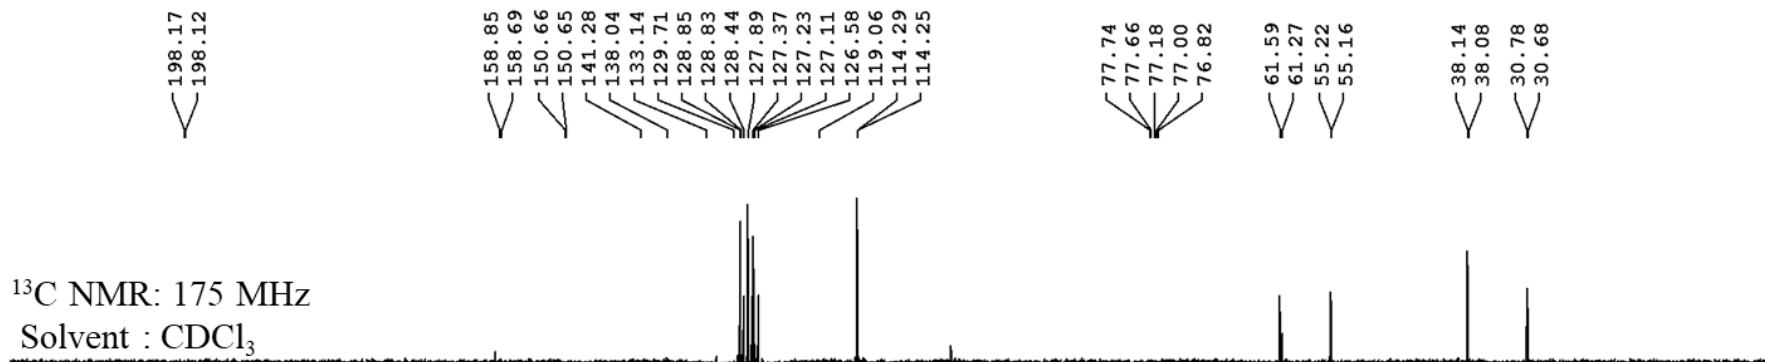

Current Data Parameters  
 NAME AK-02-09-C.fid  
 EXPNO 3  
 PROCNO 1

F2 - Processing parameters  
 SI 131072  
 SF 175.9505435 MHz  
 WDW EM  
 SSB 0  
 LB 0.30 Hz  
 GB 0  
 PC 1.00

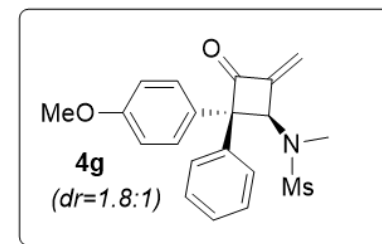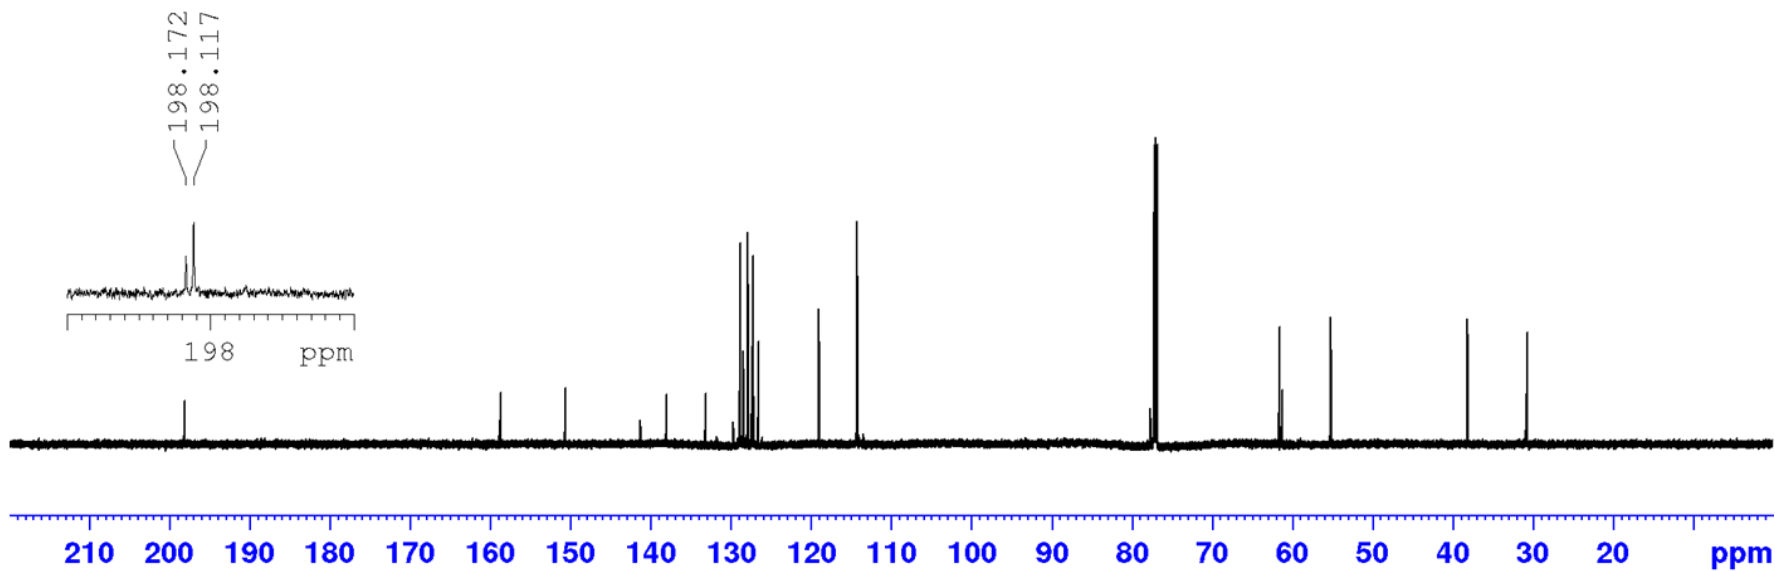

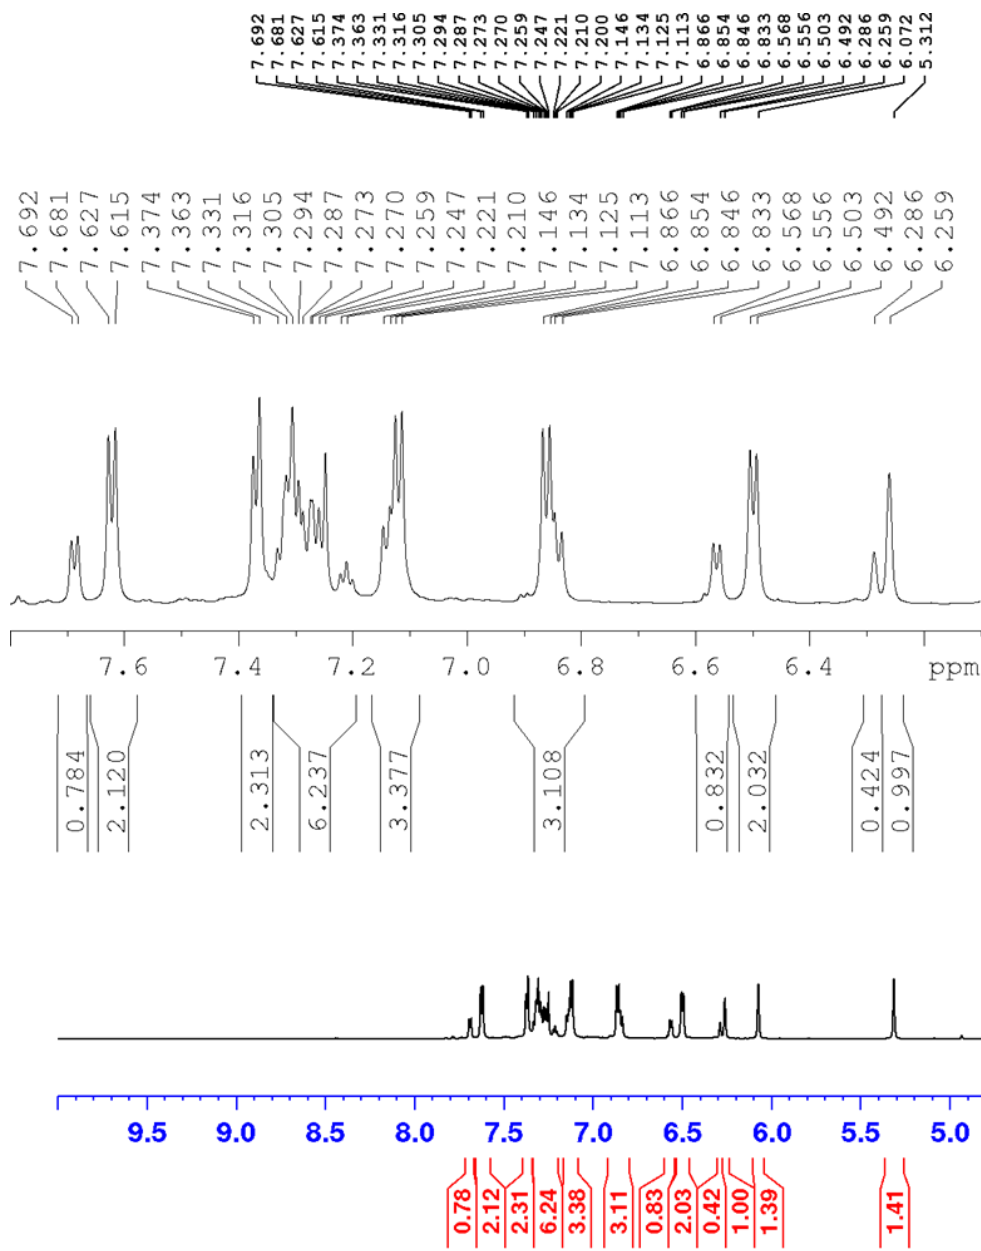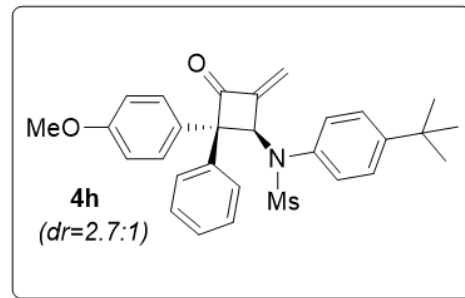

<sup>1</sup>H NMR: 700 MHz  
Solvent : CDCl<sub>3</sub>

Current Data Parameters  
 NAME AK-02-13-AP-H.fid  
 EXPNO 1  
 PROCNO 1

F2 - Processing parameters  
 SI 65536  
 SF 699.7430945 MHz  
 WDW EM  
 SSB 0  
 LB 0.30 Hz  
 GB 0  
 PC 1.00

198.99  
198.74

158.86  
158.75  
152.00  
151.99  
151.10  
151.07  
140.97  
139.28  
133.68  
133.57  
132.79  
131.65  
131.61  
131.15  
129.99  
128.85  
128.81  
128.56  
128.43  
127.33  
127.26  
127.19  
125.93  
125.93  
121.63  
121.60  
114.24  
113.84

79.38  
79.17  
77.20  
77.02  
76.83

63.92  
63.71  
55.30  
55.24

39.74  
39.68  
34.59  
34.58  
31.18  
31.17

Current Data Parameters  
NAME AK-02-13-AP-C.fid  
EXPNO 3  
PROCNO 1  
  
F2 - Processing parameters  
SI 131072  
SF 175.9505386 MHz  
WDW EM  
SSB 0  
LB 0.30 Hz  
GB 0  
PC 1.00

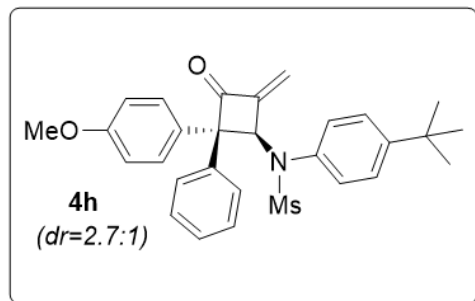

<sup>13</sup>C NMR: 175 MHz  
Solvent : CDCl<sub>3</sub>

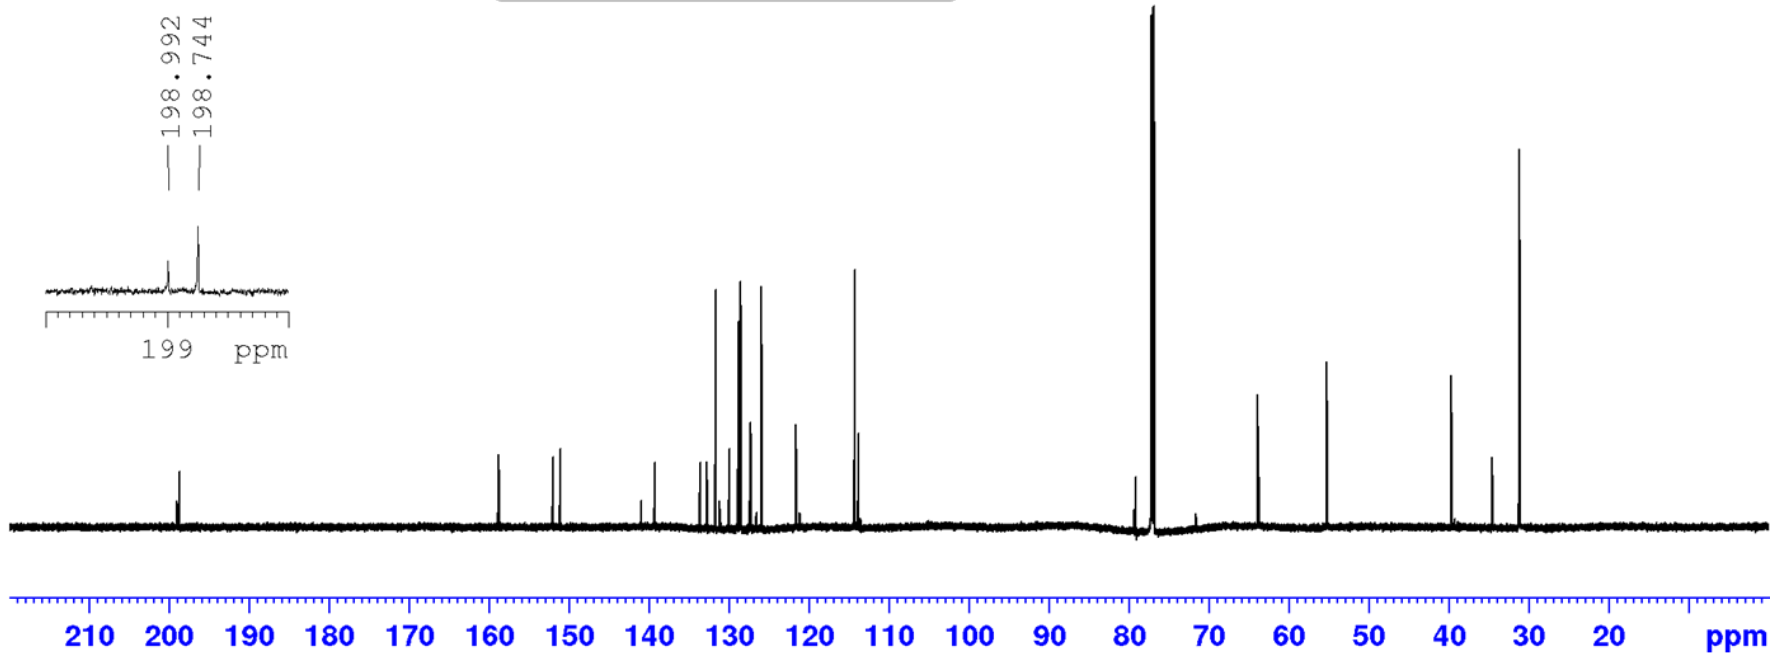

S108

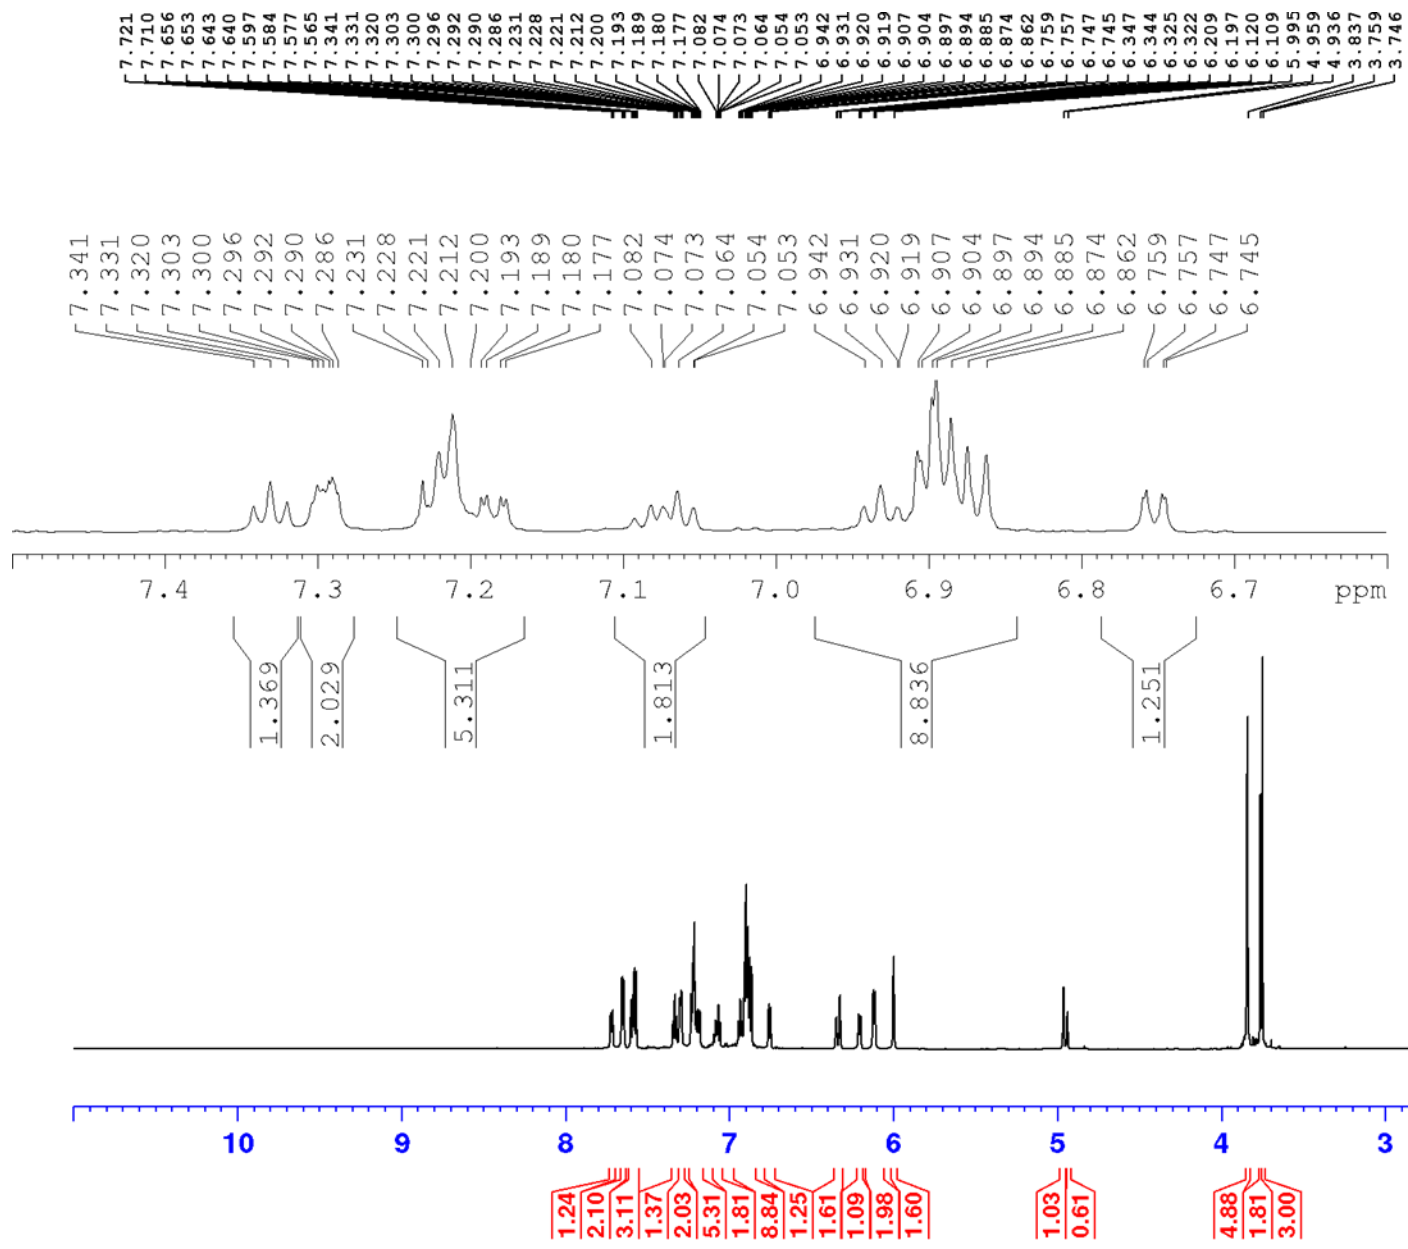

<sup>1</sup>H NMR: 700 MHz  
Solvent : CDCl<sub>3</sub>

Current Data Parameters  
NAME AK-02-20-H.fid  
EXPNO 1  
PROCNO 1

F2 - Processing parameters  
SI 65536  
SF 699.7431020 MHz  
WDW EM  
SSB 0  
LB 0.30 Hz  
GB 0  
PC 1.00

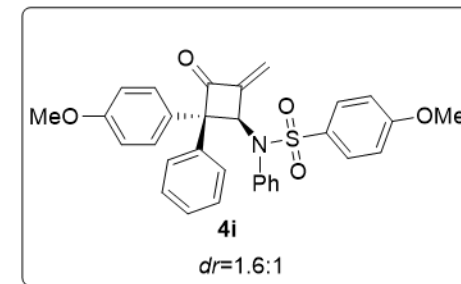

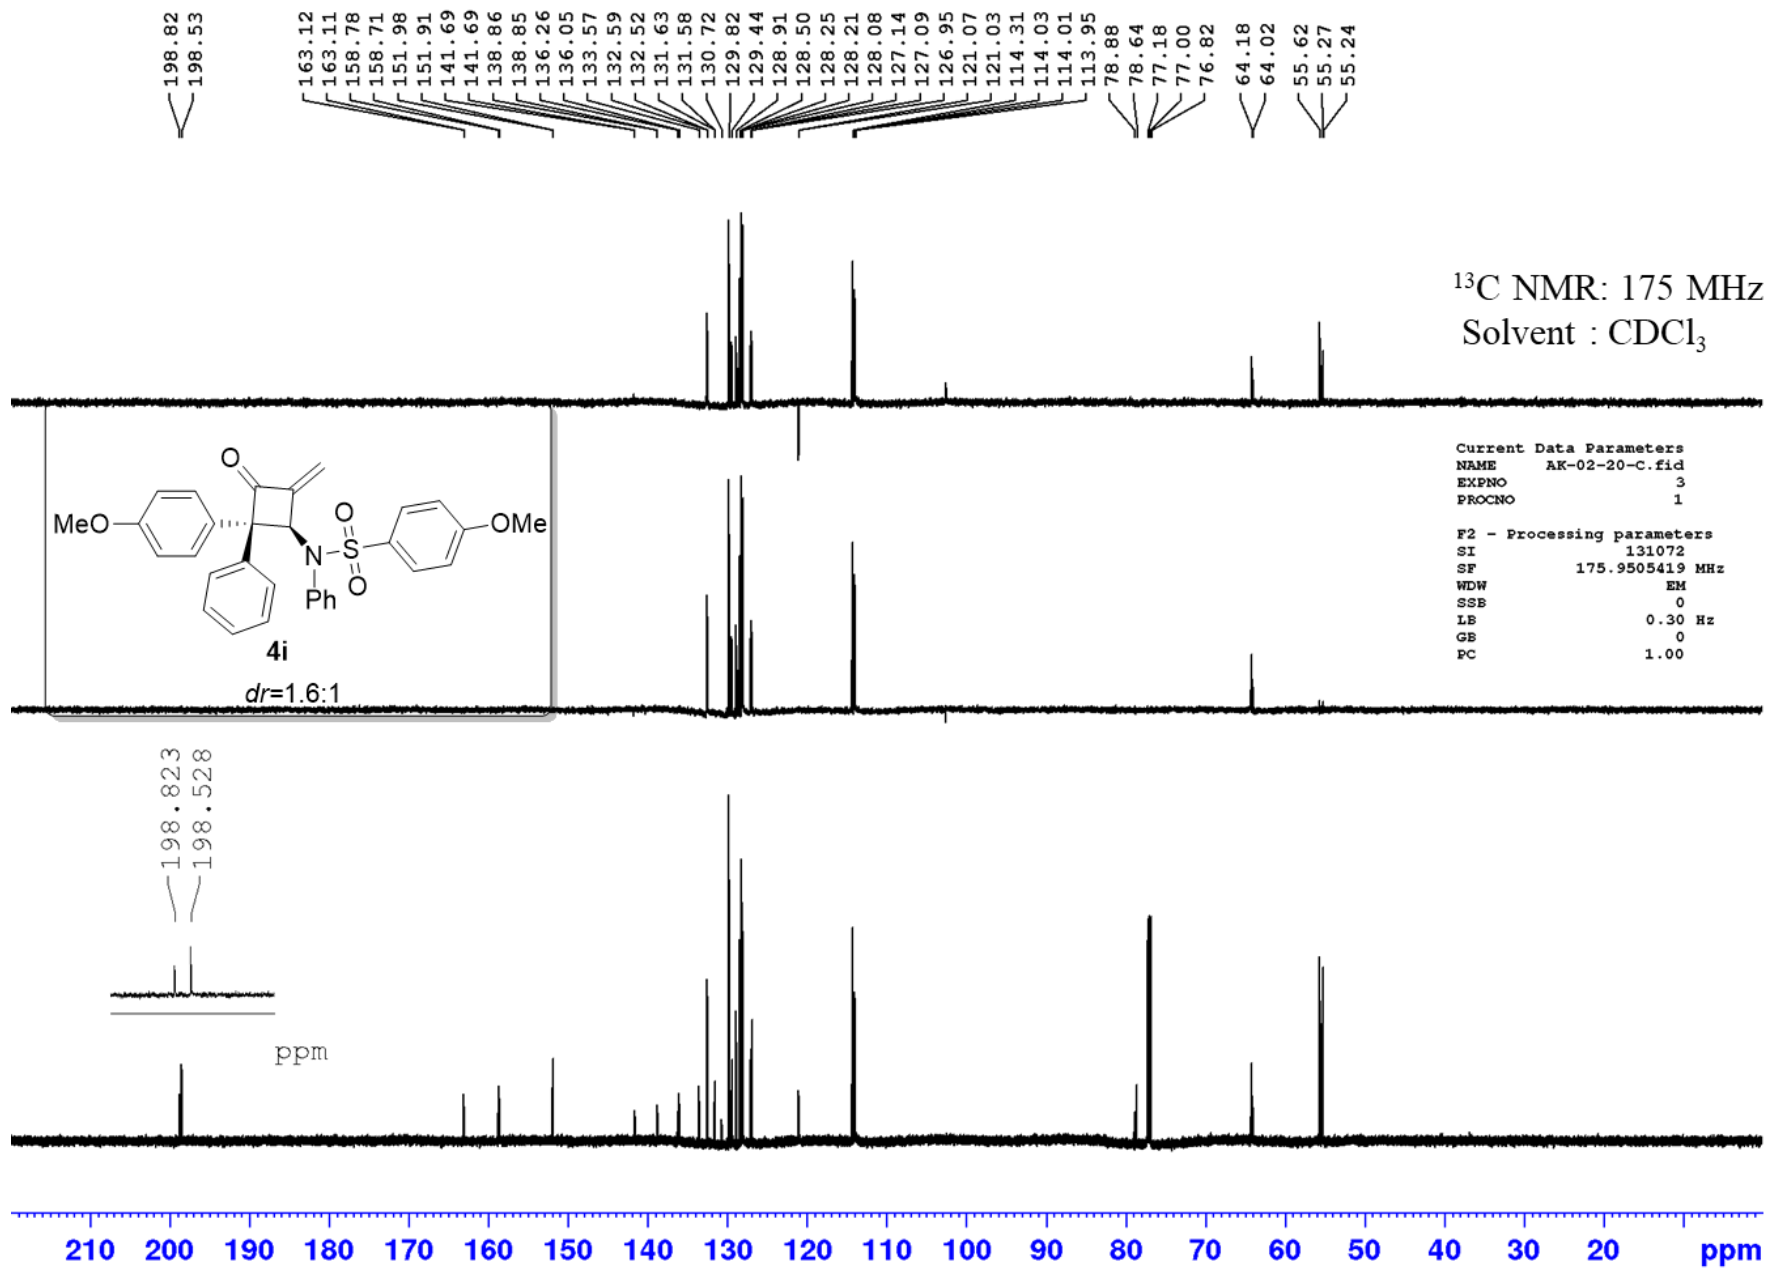

198.82  
198.53

163.12  
163.11  
158.78  
158.71  
151.98  
151.91  
141.69  
141.69  
138.86  
138.85  
136.26  
136.05  
133.57  
132.59  
132.52  
131.63  
131.58  
130.72  
129.82  
129.44  
128.91  
128.50  
128.25  
128.21  
128.08  
127.14  
127.09  
126.95  
121.07  
121.03  
114.31  
114.03  
114.01  
113.95

78.88  
78.64  
77.18  
77.00  
76.82  
64.18  
64.02  
55.62  
55.27  
55.24

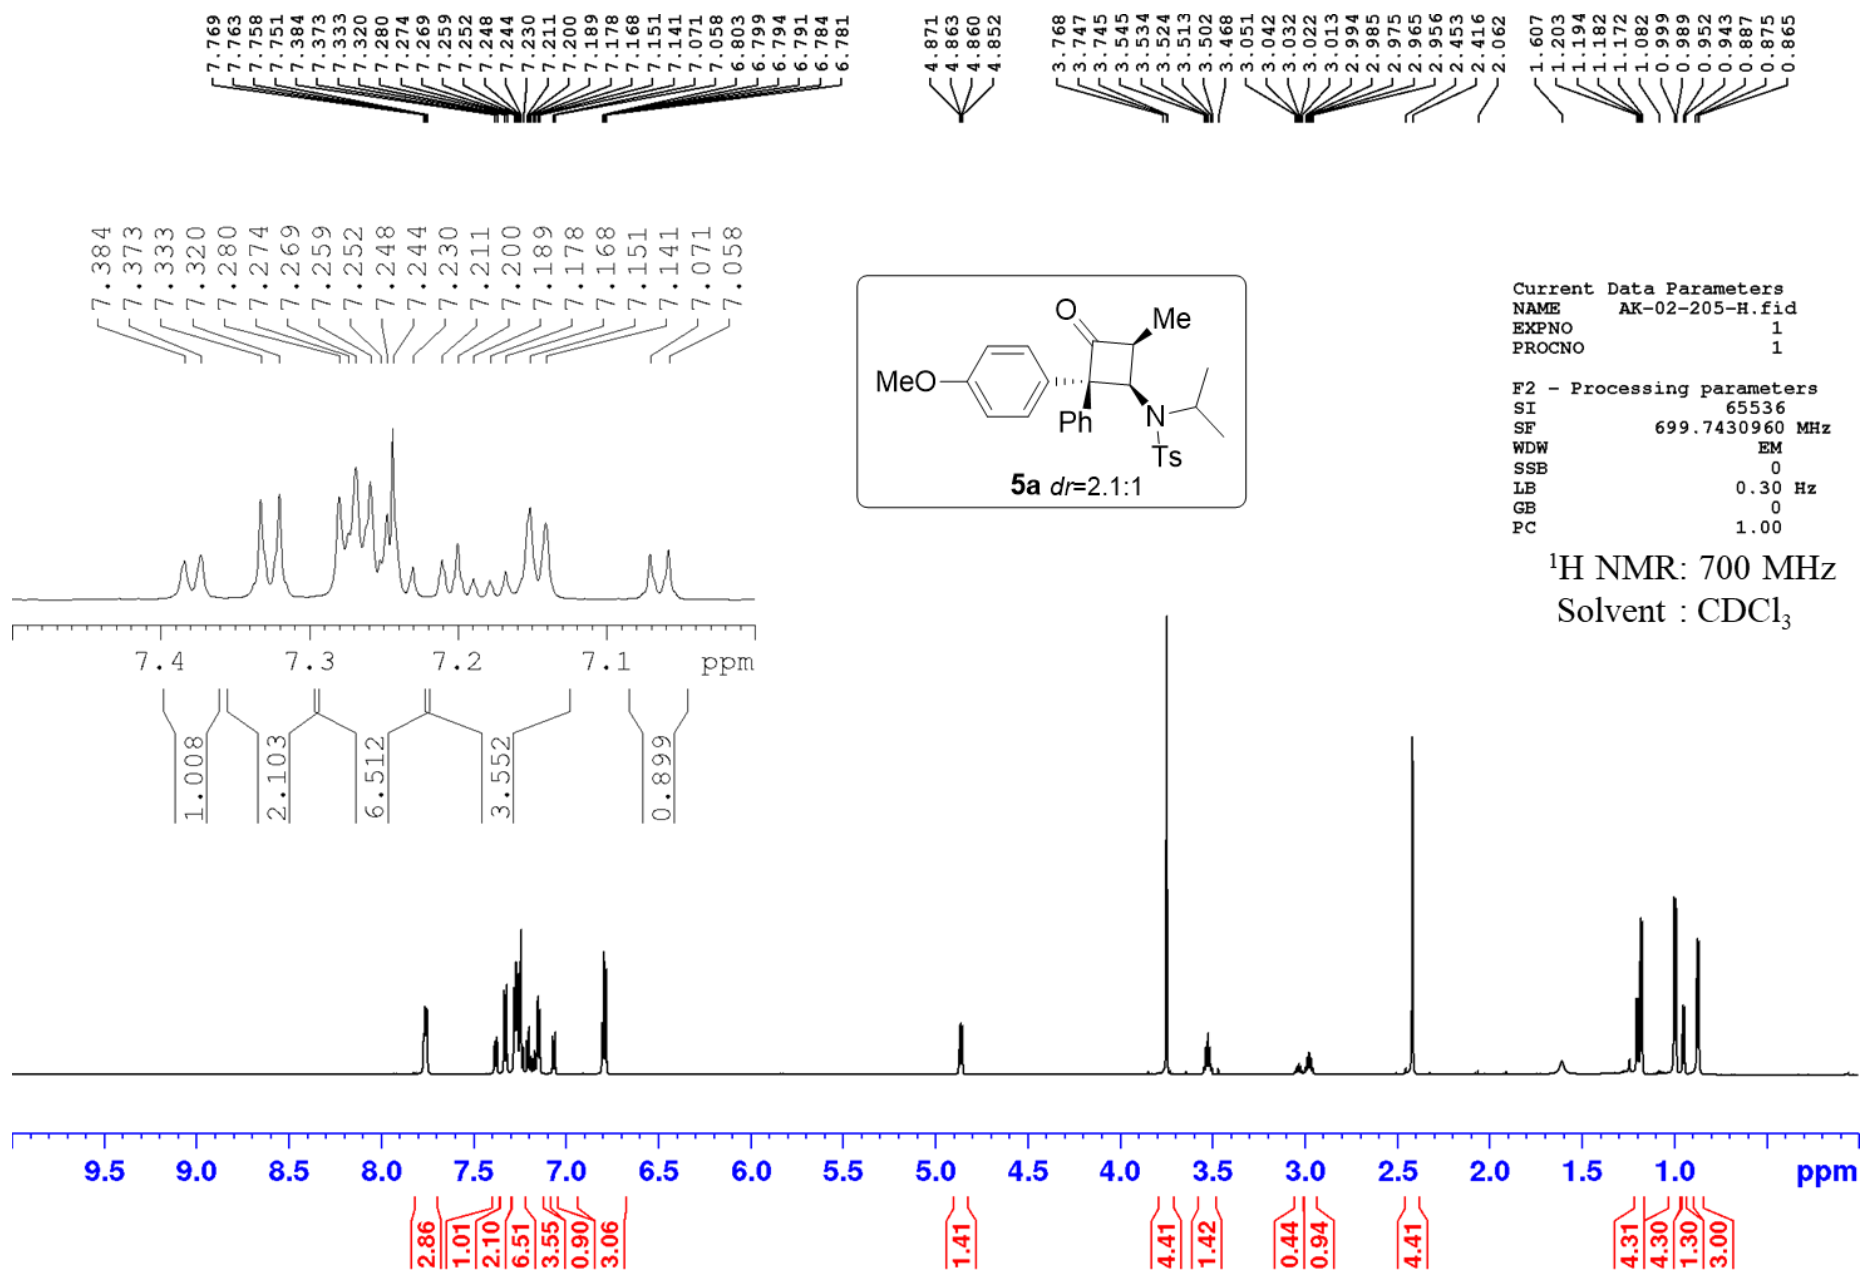

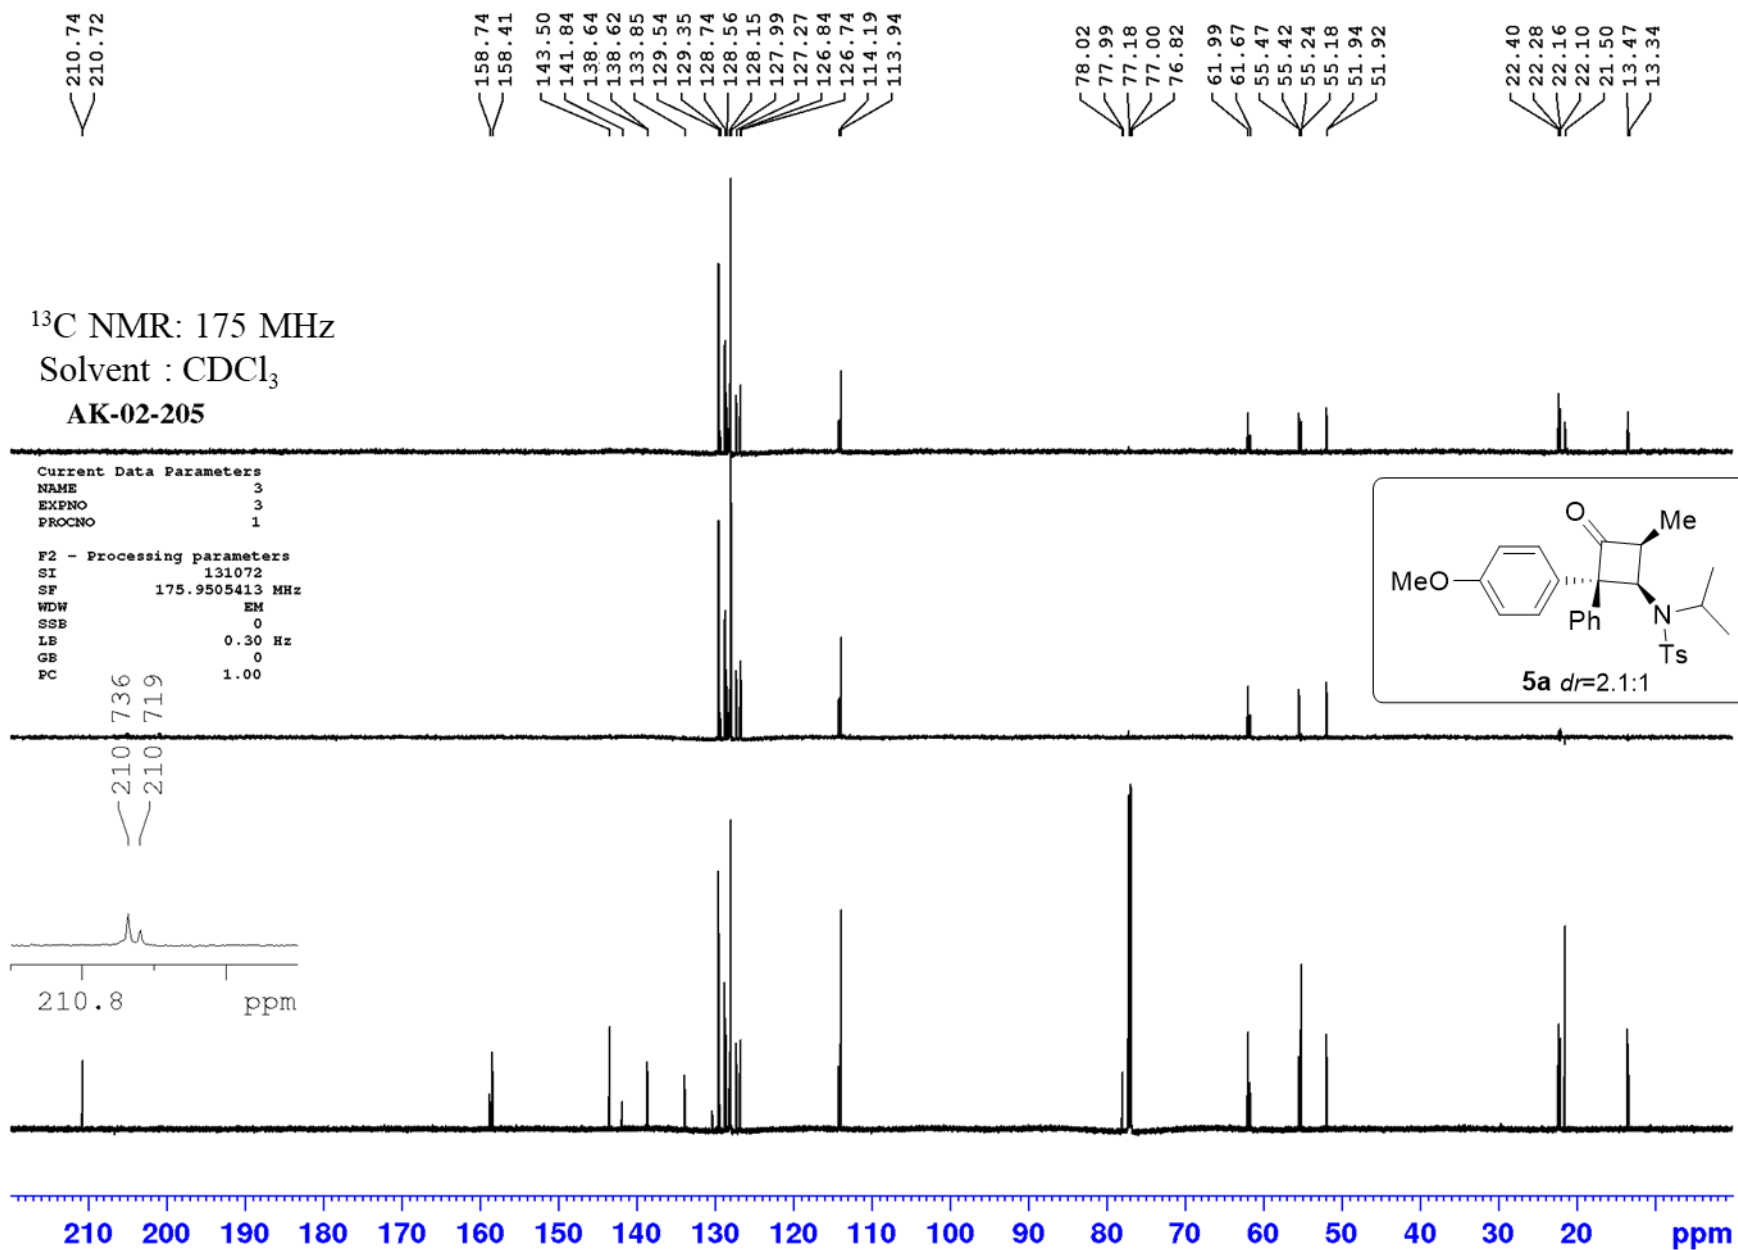



AK-02-205

Sample Name:

AK-02-205

Data Collected on:

Varian-NMR-vnmrs700

Archive directory:

Sample directory:

FidFile: AK-02-205-H

Pulse Sequence: PROTON (s2pul)

Solvent: cdcl3

Data collected on: Jul 27 2023

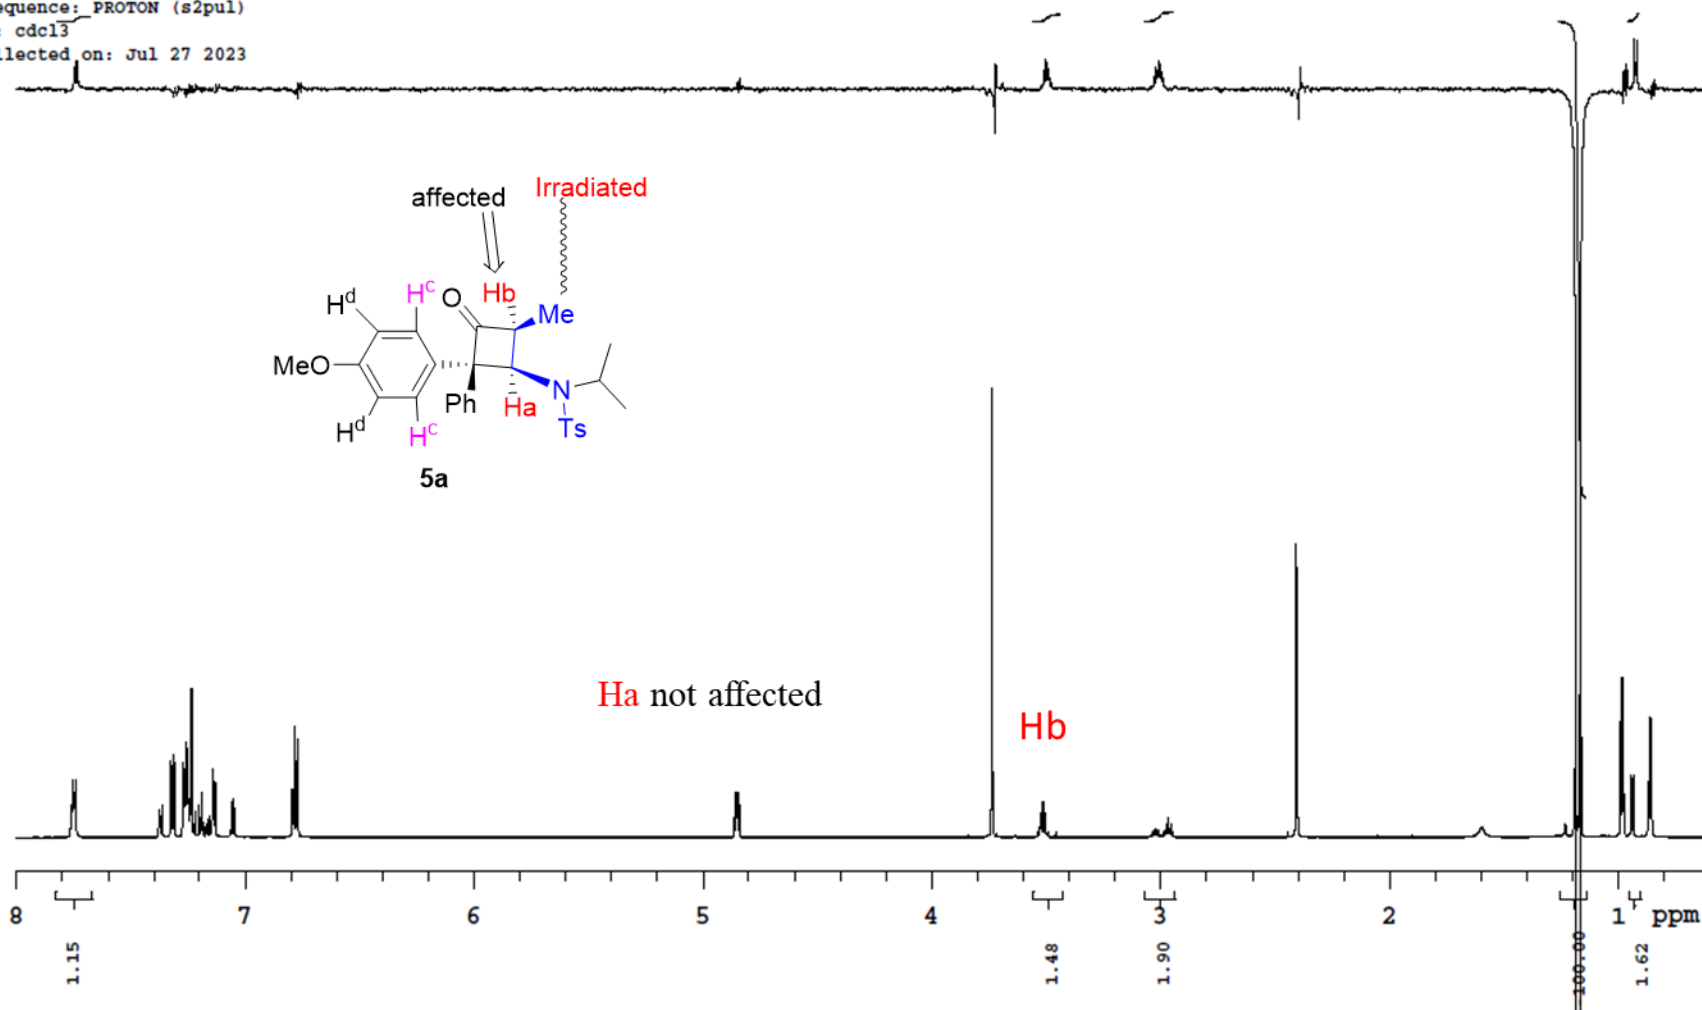

AK-02-205

Sample Name:

AK-02-205

Data Collected on:

Varian-NMR-vnmrs700

Archive directory:

Sample directory:

FidFile: AK-02-205-H

Pulse Sequence: PROTON (s2pul)

Solvent: cdcl3

Data collected on: Jul 27 2023

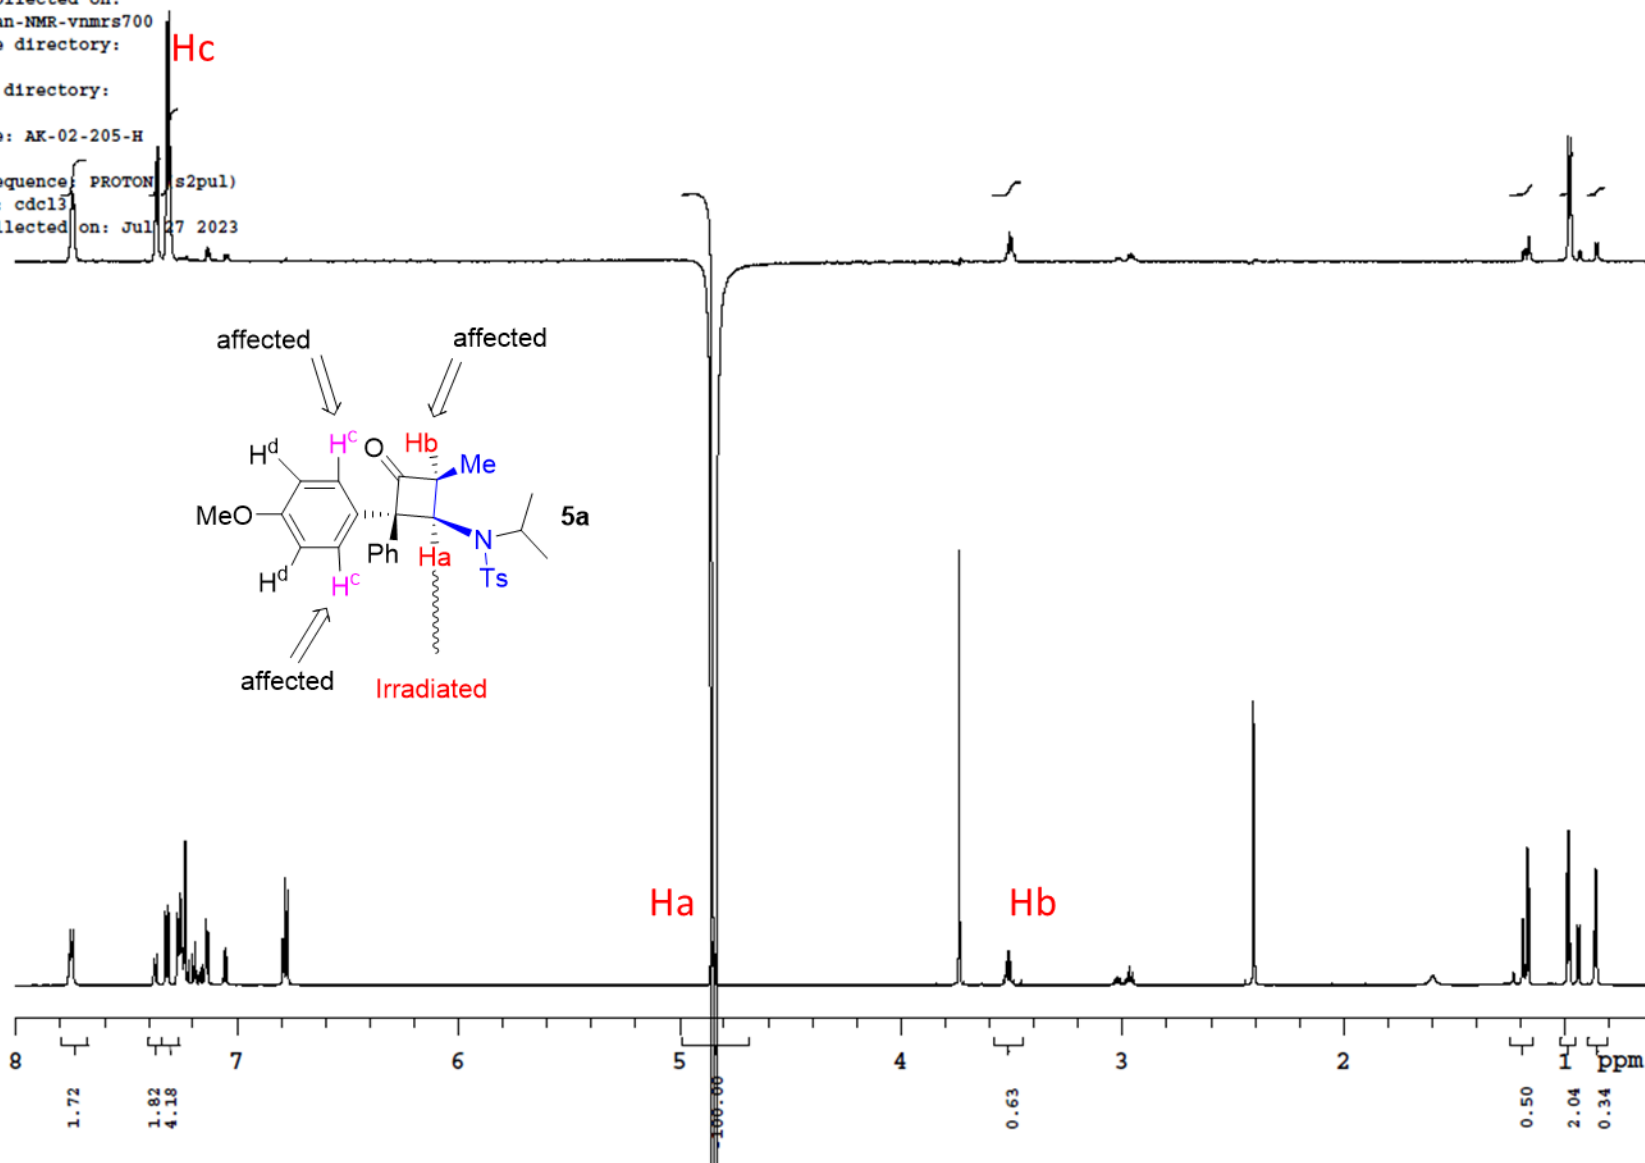

AK-02-205

Sample Name:  
AK-02-205  
Data Collected on:  
Varian-NMR-vnmrs700  
Archive directory:

Sample directory:

FidFile: AK-02-205-H

Pulse Sequence: PROTON (s2pul)  
Solvent: cdcl3  
Data collected on: Jul 27 2023

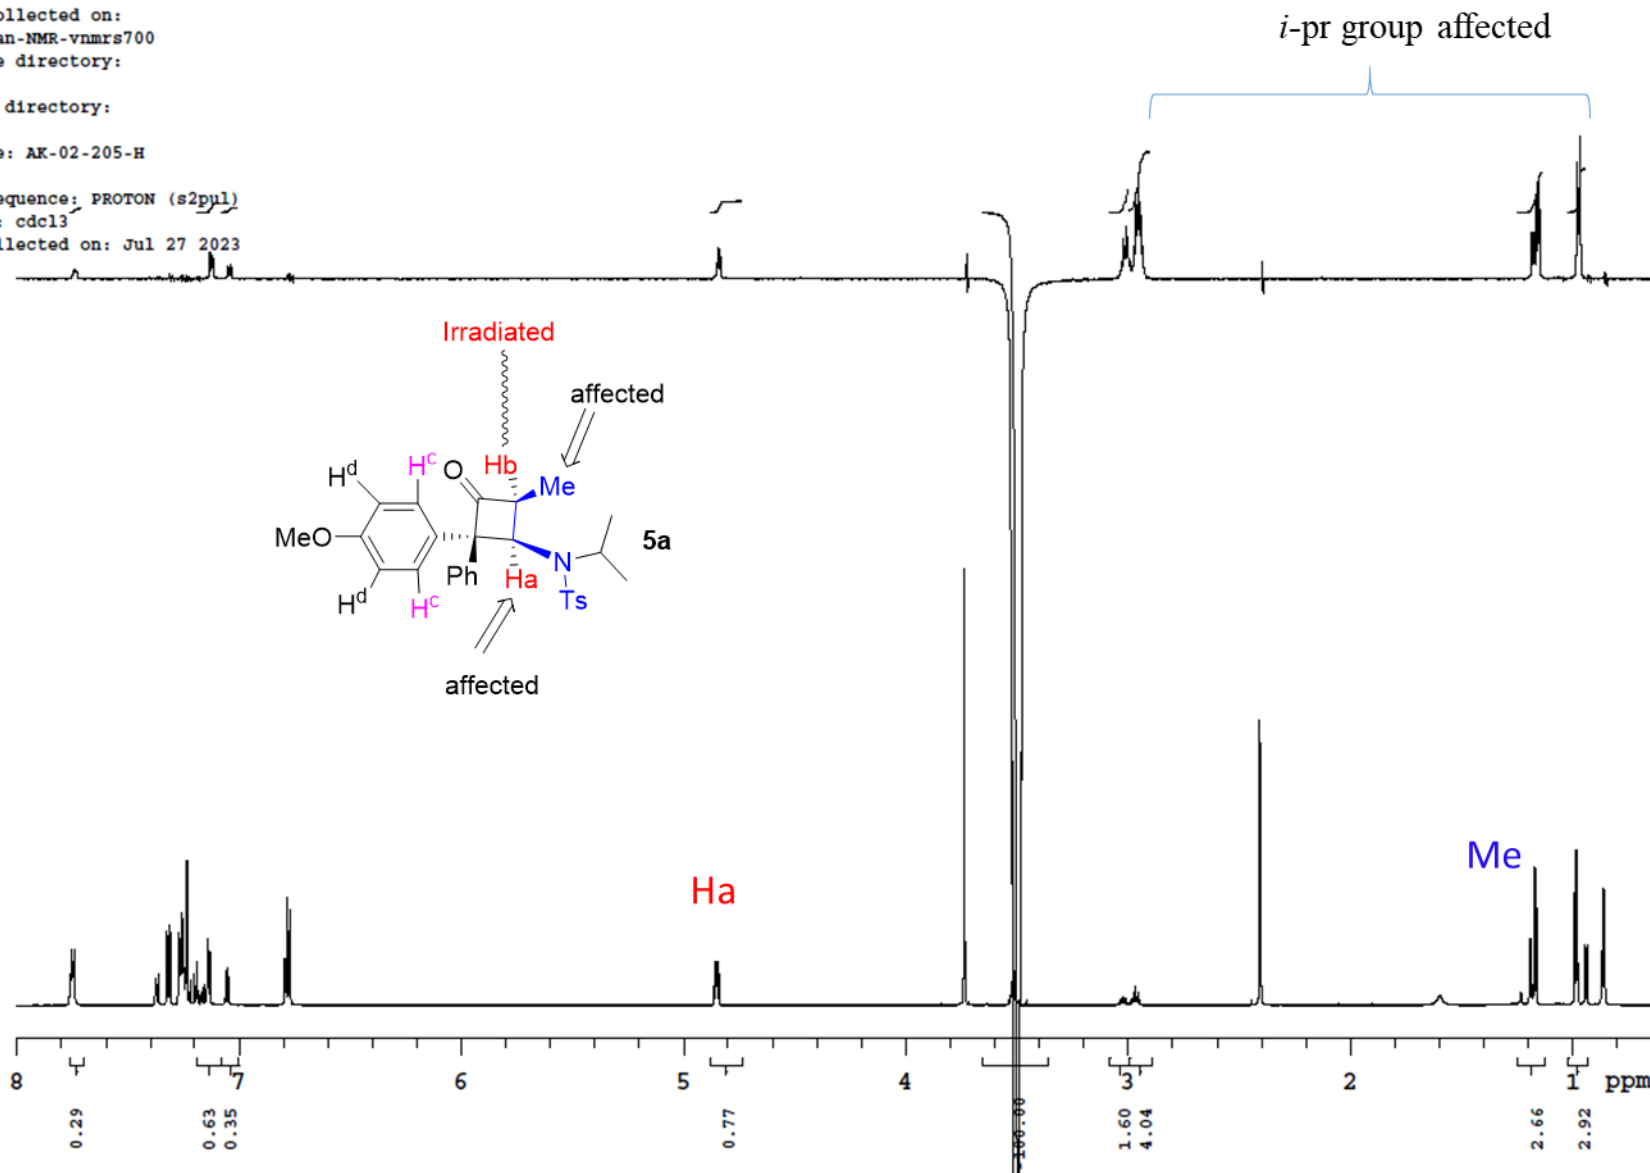

AK-02-205

Sample Name:  
AK-02-205  
Data Collected on:  
Varian-NMR-vnmrs700  
Archive directory:

Sample directory:

FidFile: AK-02-205-H

Pulse Sequence: PROTON (s2pul)  
Solvent: cdcl3  
Data collected on: Jul 27 2023

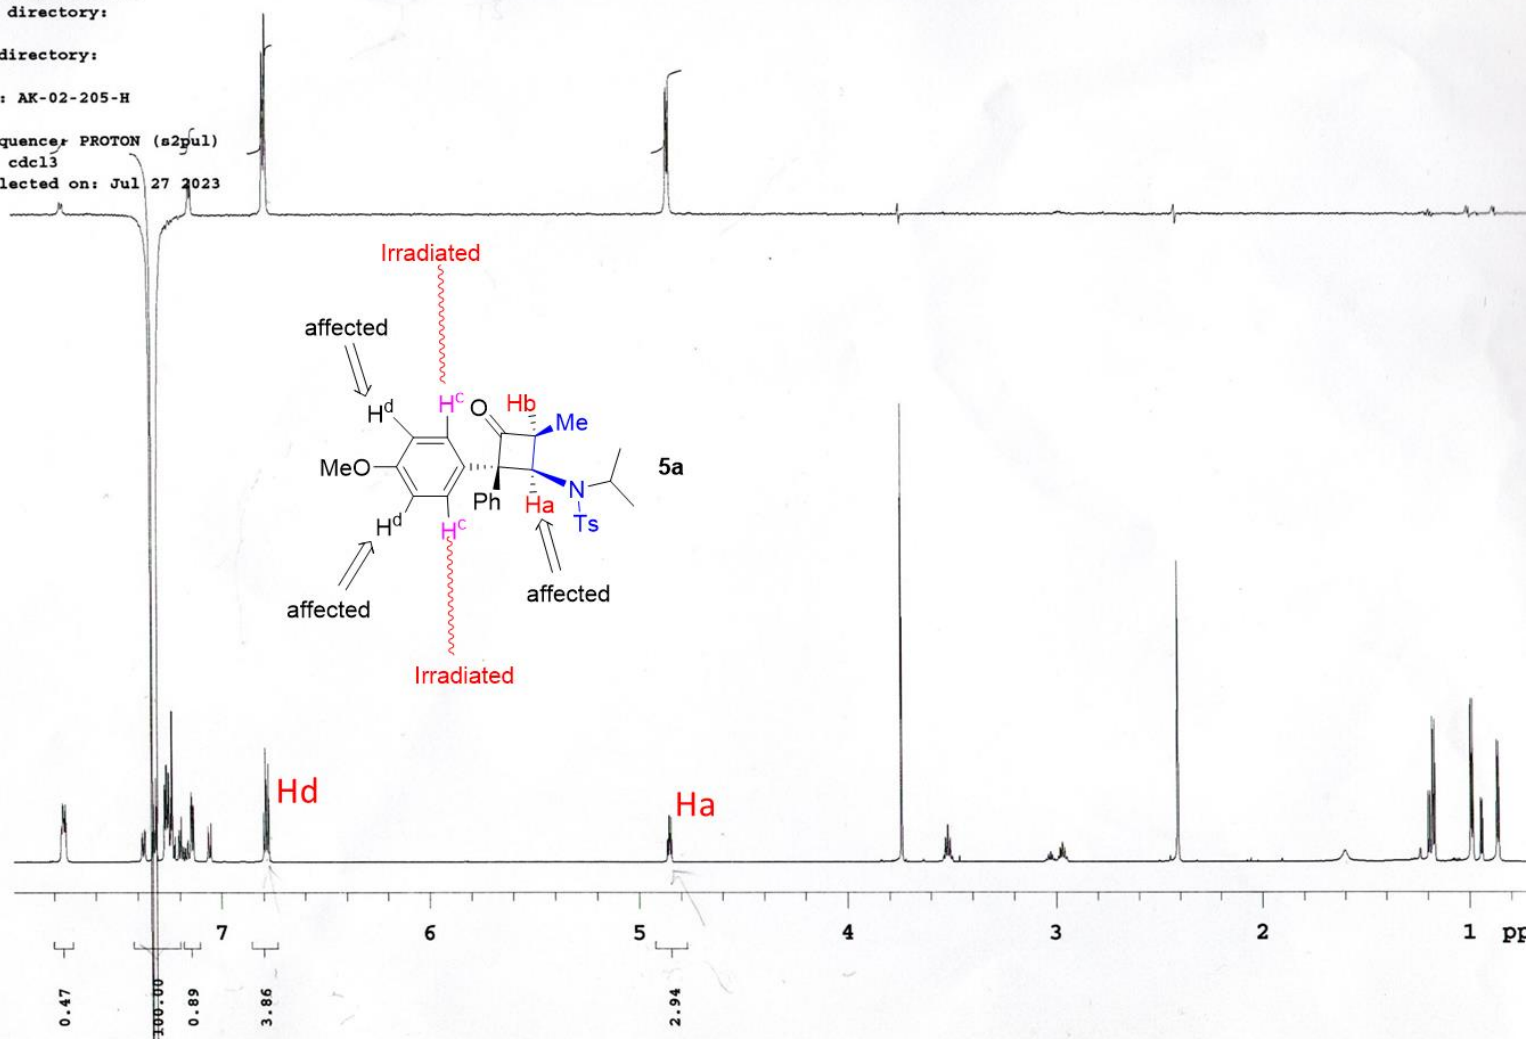

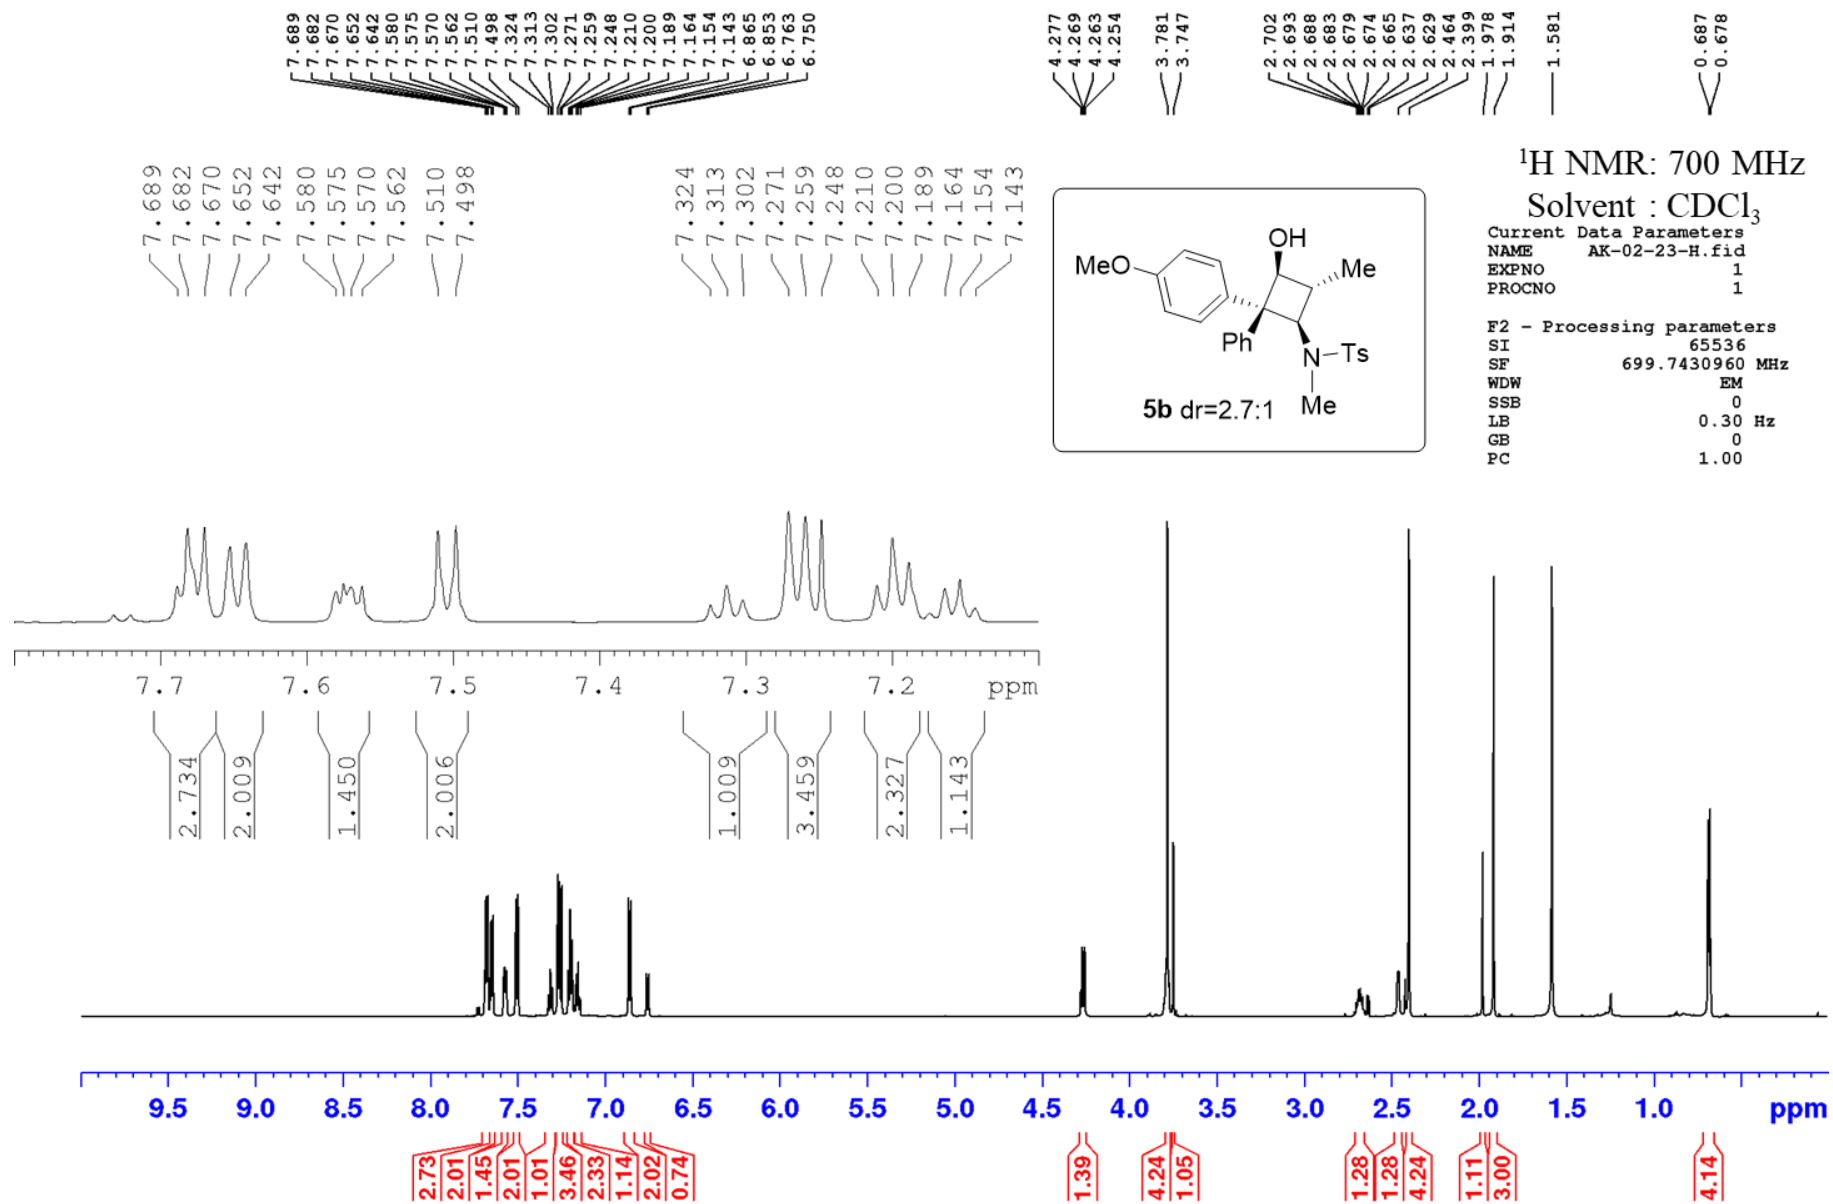

$^{13}\text{C}$  NMR: 175 MHz  
Solvent :  $\text{CDCl}_3$

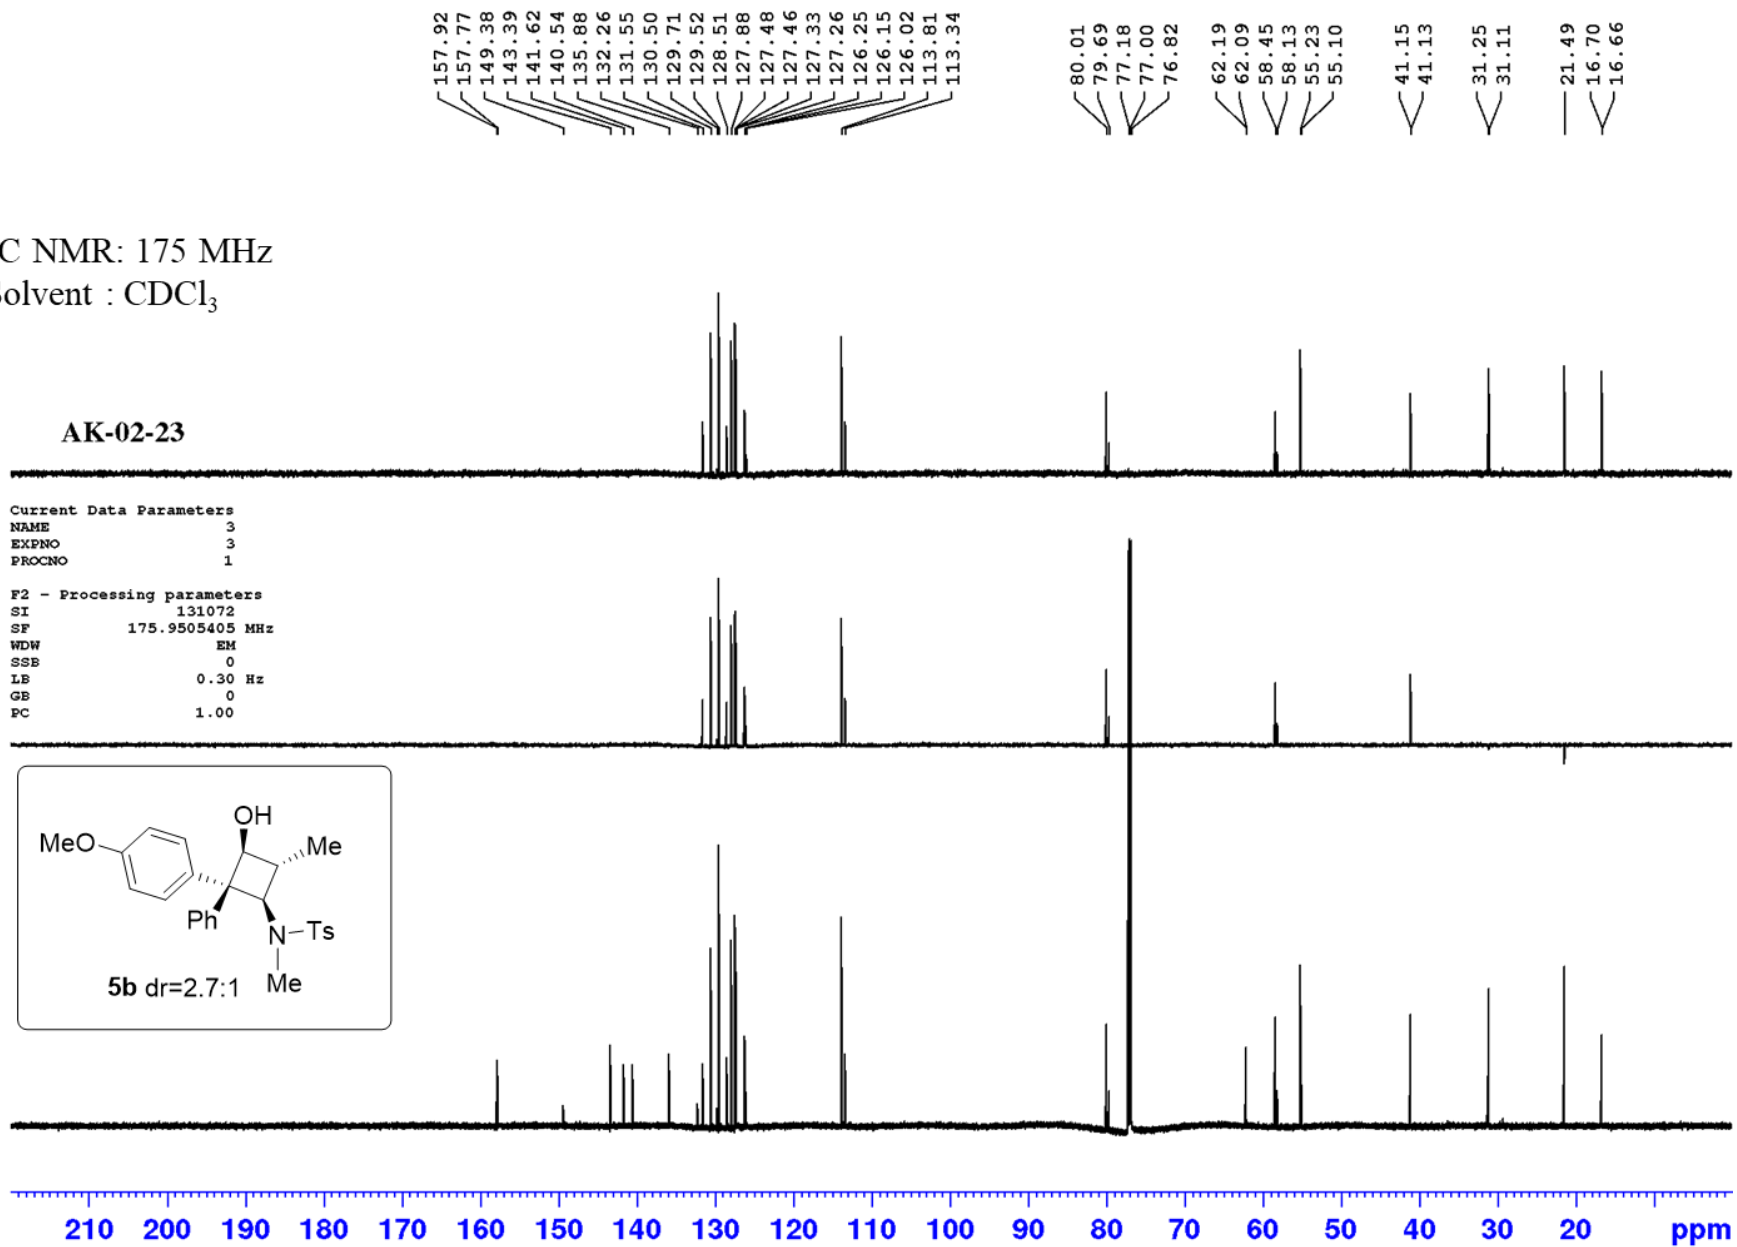

AK-02-23

Sample Name:

AK-02-23

Data Collected on:

Varian-NMR-vnmrs700

Archive directory:

Sample directory:

FidFile: AK-02-23-H

Pulse Sequence: PROTON (s2pul)

Solvent: cdcl3

Data collected on Oct 18 2022

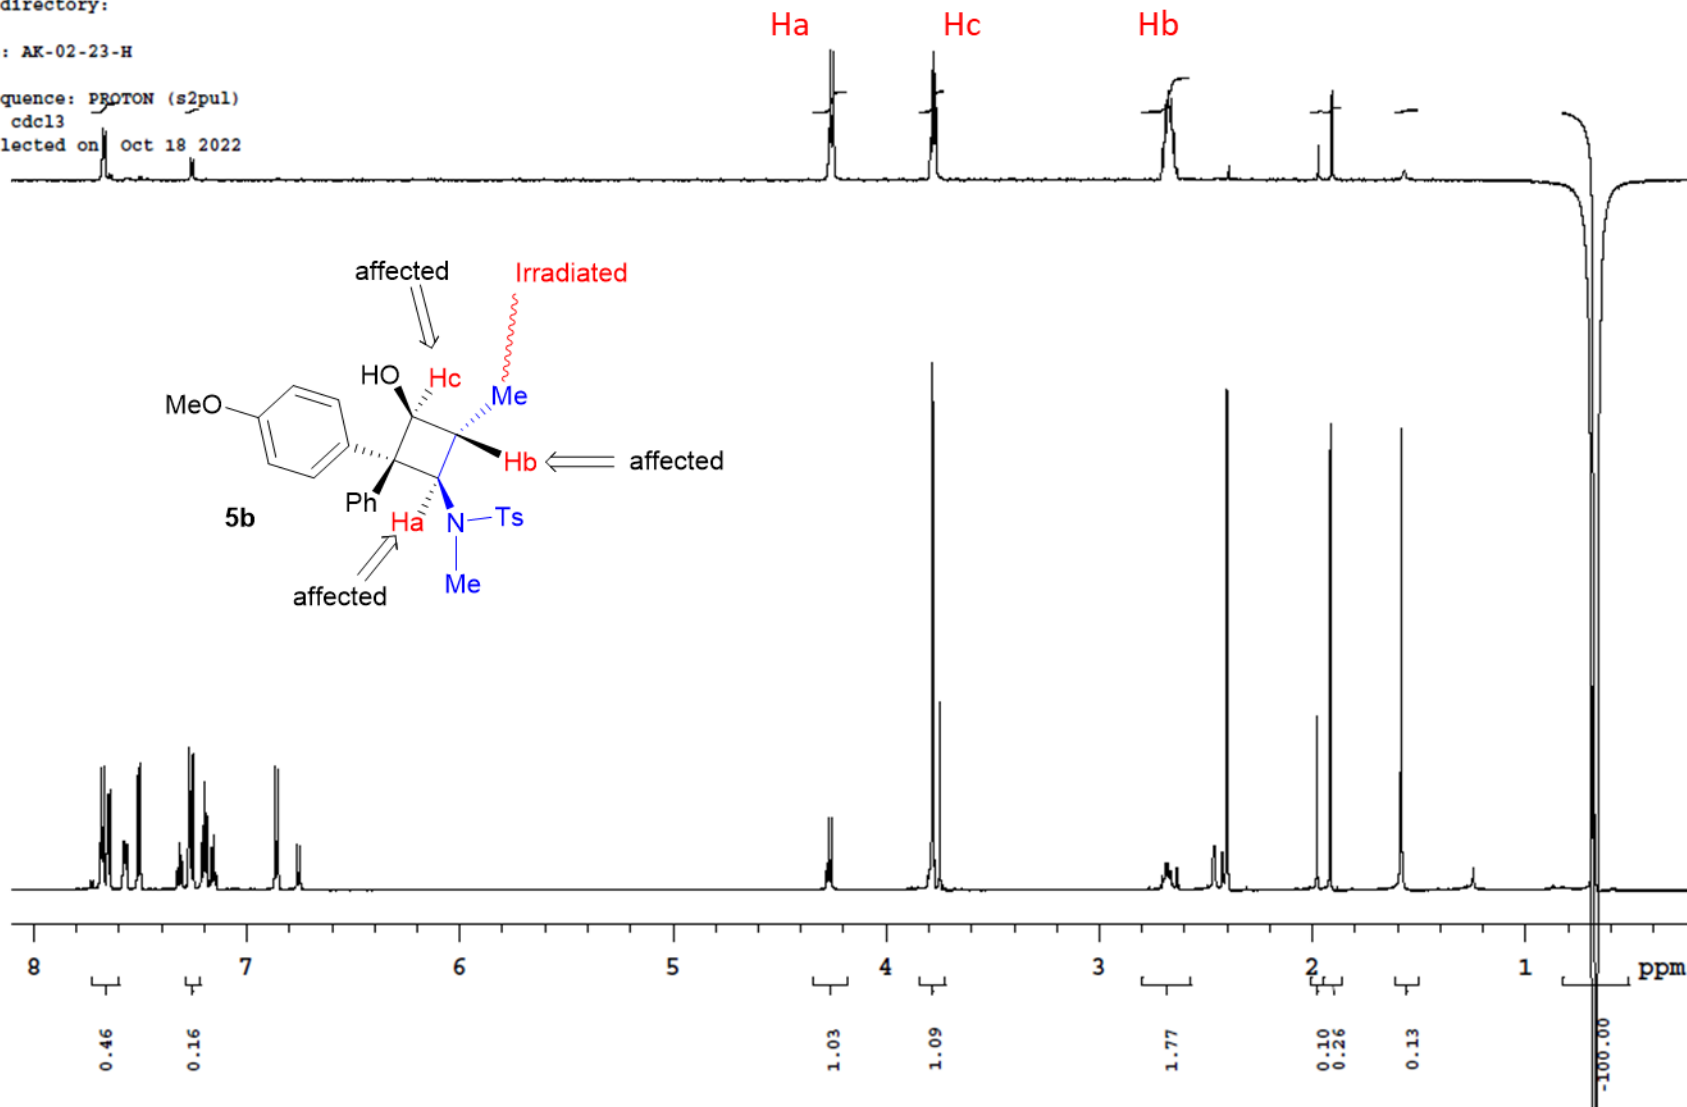

AK-02-23

Sample Name:  
AK-02-23  
Data Collected on:  
Varian-NMR-vnmrs700  
Archive directory:  
Sample directory:  
FidFile: AK-02-23-H  
Pulse Sequence: PROTON (s2pul)  
Solvent: cdcl3  
Data collected on: Oct 18 2022

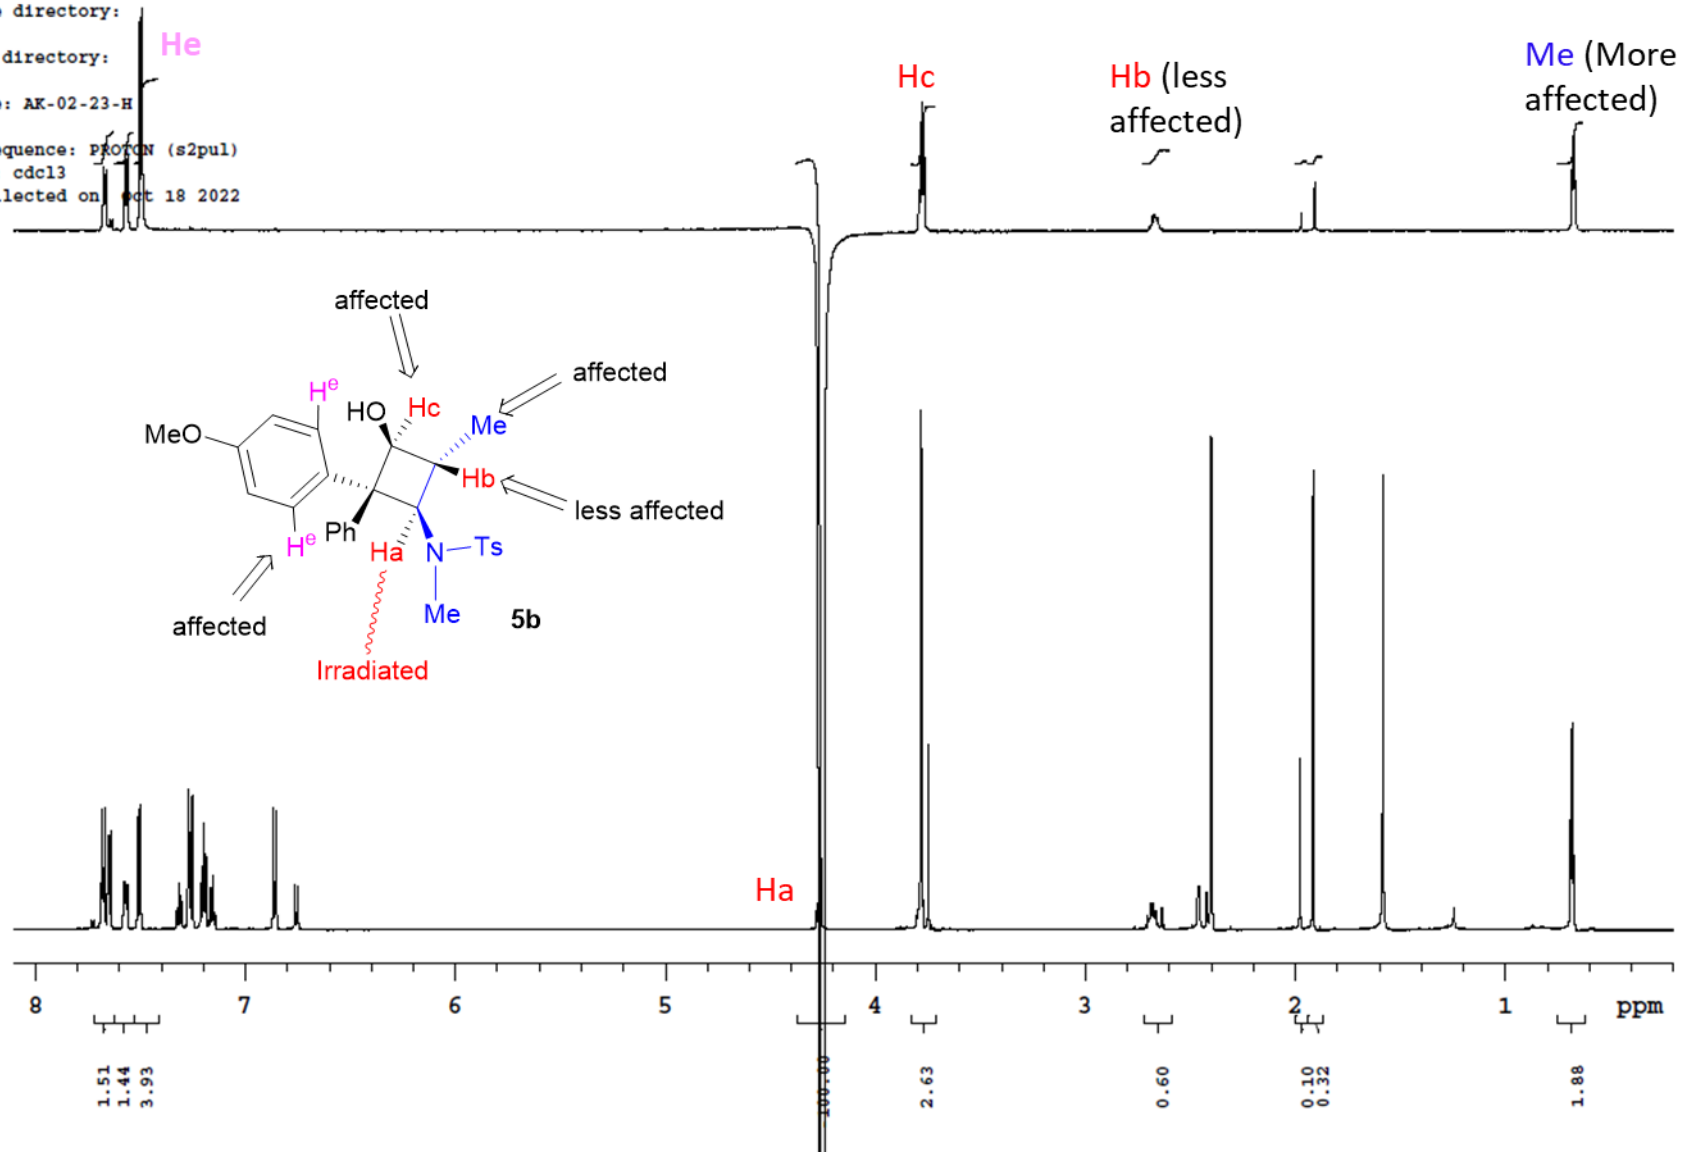



AK-02-23

Sample Name:

AK-02-23

Data Collected on:

Varian-NMR-vnmrs700

Archive directory:

Sample directory:

FidFile: AK-02-23-H

Pulse Sequence: PFGON (s2pul)

Solvent: cdcl3

Data collected on: Oct 18 2022

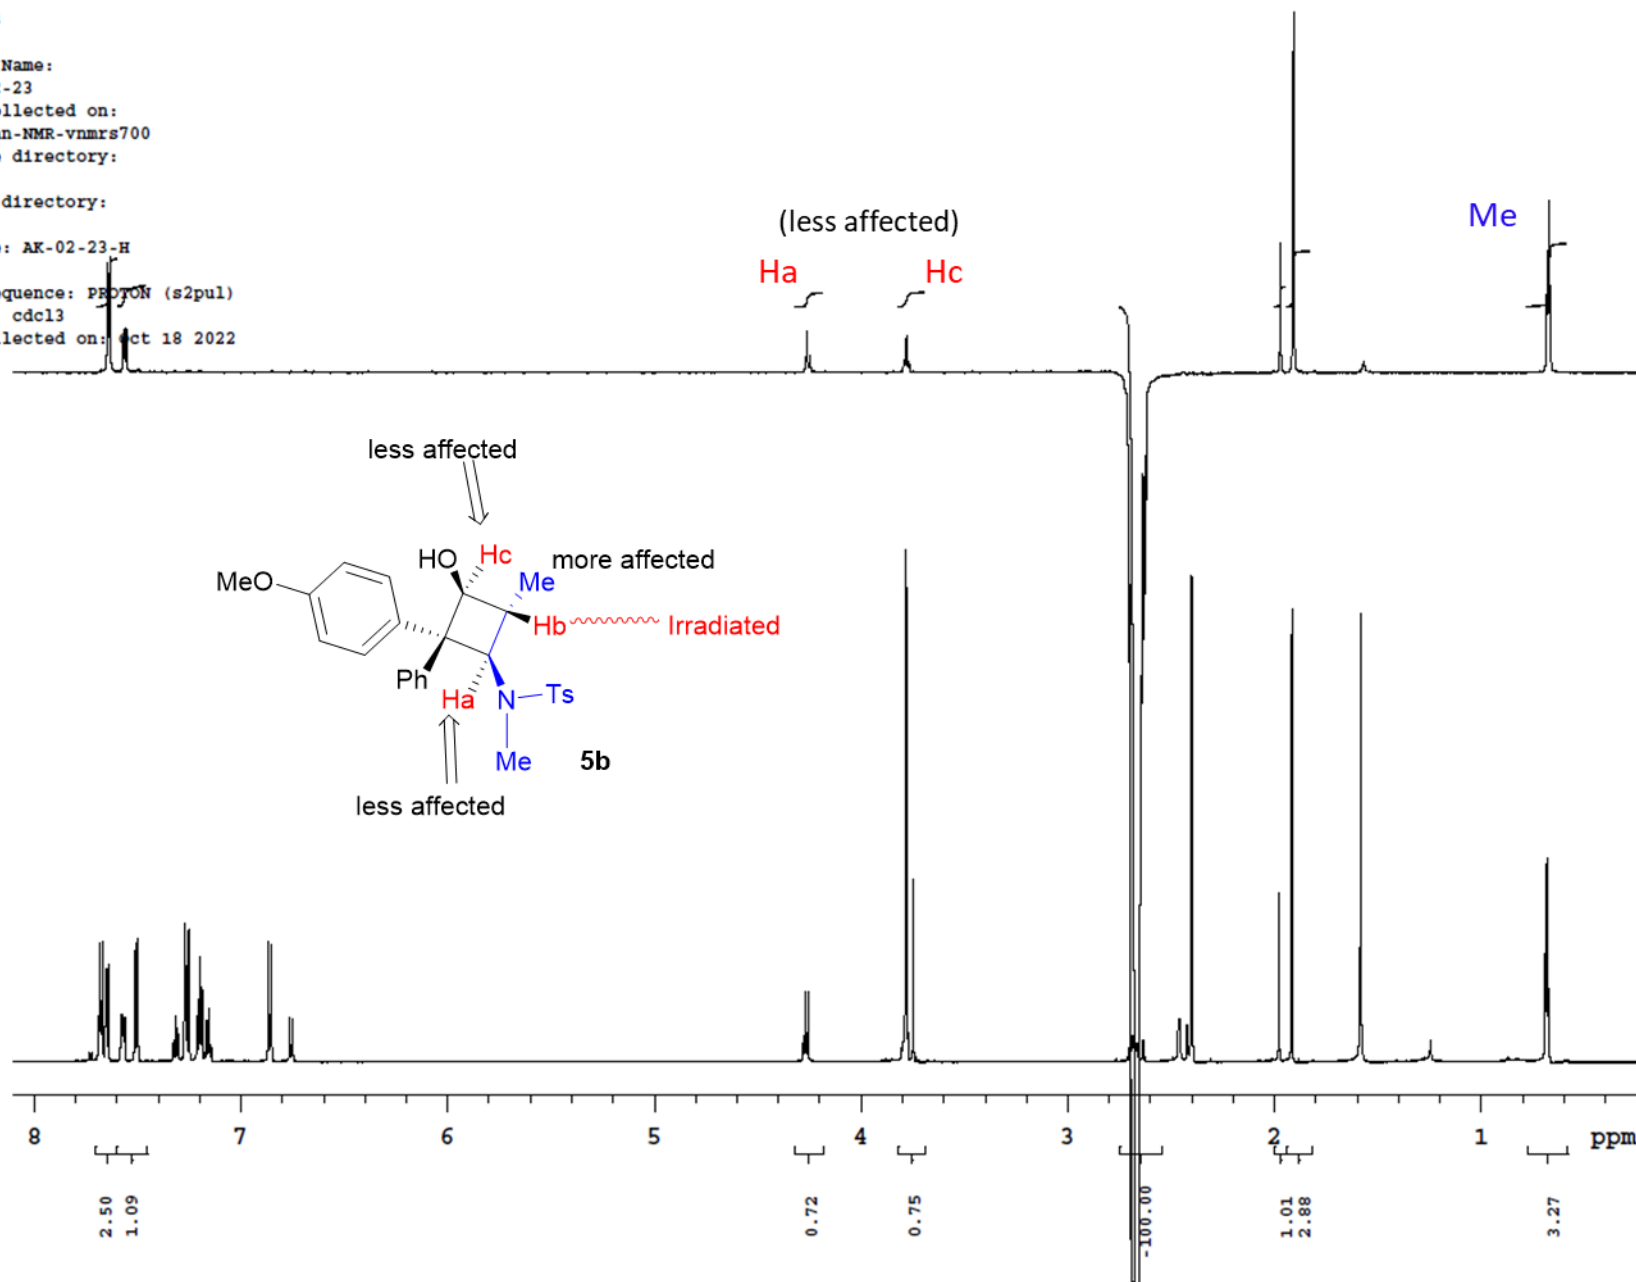

Supplement: d3cc03979j1.pdf [file d3cc03979j1.pdf]
